# Supplementary material for: Dalpiciclib partially abrogates ER signaling activation induced by pyrotinib in HER2+HR+ breast cancer
Source: eLife. 2023 Jan 5;12:e85246. doi: 10.7554/eLife.85246 (PMC9822241; doi:10.7554/eLife.85246)
Supplement: Figure 1—figure supplement 1—source data 1. [file elife-85246-fig1-figsupp1-data1.xlsx]

## Sheet: Sheet1
	C (Log nM)	pyrotinib+tamoxifen			Figure 1-figure supplement 1 a		C (Log μM)	tamoxifen					C (Log μM)	dalpiciclib				C (Log μg/ml)	trastuzumab
		mean	SD					mean	SD					mean	SD				mean	SD
	0	99.8	4.84				0	98.7	5.87				0	101.2	4.86			0	100	7.19
	0.47	80.1	3.21				0.47	91.2	6.84				0.3	87.4	6.84			0.49485	82.62	3.09
	0.78	61.2	7.83				0.6	74.5	8.46				0.7	65.8	8.42			0.79588	77.18	4.14
	1.04	49.6	7.42				0.7	53.2	8.32				0.95	53.6	7.84			1.0969	68.21	4.5
	1.41	38.9	4.84				0.78	41.3	7.84				1.04	43.2	6.88			1.39794	66.57	3.89
	1.7	27.8	6.98				0.95	19.8	11.32				1.23	24.2	9.82			1.6989	59.6	8.1
																		2	57.58	6.01
																		2.301	50.2	2.3
																		2.602	43.95	3.1
					Figure 1-figure supplement 1 b				colone number
									ctrl	pyrotinib	tamoxifen	SHR6390	pyrotinib+SHR6390	pyrotinib+tamoxifen	tamoxifen+SHR6390	pyrotinib+tamoxifen+SHR6390
								test 1	113	41	46	88	21	22	49	8
								test 2	105	51	53	76	17	18	51	10
								test 3	111	43	48	84	19	19	47	13
