# Supplementary material for: Dalpiciclib partially abrogates ER signaling activation induced by pyrotinib in HER2+HR+ breast cancer
Source: eLife. 2023 Jan 5;12:e85246. doi: 10.7554/eLife.85246 (PMC9822241; doi:10.7554/eLife.85246)
Supplement: Figure 1—source data 1. [file elife-85246-fig1-data1.xlsx]

## Sheet: Sheet1
Figure 1 a	concentration point	tamoxifen		pyrotinib+tamoxifen		pyrotinib					concentration point	pyrotinib+SHR6390		SHR6390		pyrotinib				concentration point	tamoxifen		SHR6390		tamoxifen+SHR6390
		Mean	SD	Mean	SD	Mean	SD					Mean	SD	Mean	SD	Mean	SD				Mean	SD	Mean	SD	Mean	SD
	0	100	7.44	100	4.62	100	2.19				0	100	2.1	100	7.23	100	2.19			0	100	7.44	100	7.23	100	6.09
	1	95.86	6.87	77.98	7.92	96.08	0.57				1	90.06	2.7	88.69	3.48	96.08	0.57			1	95.86	6.87	88.69	3.48	91.01	9.57
	2	93.52	5.73	69.57	5.52	91.36	6.42				2	81.08	3.12	85.75	2.61	91.36	6.42			2	93.52	5.73	85.75	2.61	86.76	12.27
	3	89.49	6.42	62.11	5.16	80.57	6.15				3	67.13	4.23	77.83	3.42	80.57	6.15			3	89.49	6.42	77.83	3.42	82.07	7.59
	4	71.3	6.39	52.89	1.38	59.96	9.87				4	48.08	4.38	63.96	6.36	59.96	9.87			4	71.3	6.39	63.96	6.36	70.78	3
	5	55.77	2.13	30.22	1.44	50.82	6.12				5	22.99	1.5	52.65	2.82	50.82	6.12			5	55.77	2.13	52.65	2.82	56.28	5.22
	6	39.5	2.34	13.17	2.01	41.16	4.56				6	13.66	1.2	45.11	2.04	41.16	4.56			6	39.5	2.34	45.11	2.04	48.24	7.65
	7	10.02	1.29	6.2	0.84	37.62	4.17				7	8.97	0.81	22.91	3.21	37.62	4.17			7	10.02	1.29	22.91	3.21	12.56	1.98
Figure 1 b		concentration point	tamoxifen		SHR6390		pyrotinib		3 combination
			Mean	SD	Mean	SD	Mean	SD	Mean	SD
		0	100	7.44	100	7.23	100	2.19	100	6.36
		1	95.86	6.87	88.69	3.48	96.08	0.57	83.76	4.44
		2	93.52	5.73	85.75	2.61	91.36	6.42	72.29	3.99
		3	89.49	6.42	77.83	3.42	80.57	6.15	64.29	4.11
		4	71.3	6.39	63.96	6.36	59.96	9.87	50.58	6.36
		5	55.77	2.13	52.65	2.82	50.82	6.12	20.07	2.52
		6	39.5	2.34	45.11	2.04	41.16	4.56	12.73	1.29
		7	10.02	1.29	22.91	3.21	37.62	4.17	6.99	0.96
Figure 1 c			combination at EC50										combination at 1/2 EC50
			3 combination	pyrotinib+SHR6390	pyrotinib+tamoxifen	tamoxifen+SHR6390	DMSO ctrl						3 combination	pyrotinib+SHR6390	pyrotinib+tamoxifen	tamoxifen+SHR6390	DMSO ctrl
		vialibility percentage	15.14	18.45	38.5	45.61	98.5					vialibility percentage	40.56	45.23	56.26	76.82	98.5
		vialibility percentage	14.02	23.18	29.16	54.21	100					vialibility percentage	41.68	47.66	58.32	83.55	94.2
		vialibility percentage	18.13	17.94	32.52	53.64	104.5					vialibility percentage	44.3	51.59	57.38	84.11	103.4
		vialibility percentage	13.07	20.93	37.01	49.91	93.4					vialibility percentage	39.44	53.27	53.46	78.88	100
		vialibility percentage	17.38	17.38	36.64	43.93	108.2					vialibility percentage	45.42	45.79	55.33	75.89	104.1
