# Supplementary material for: Dalpiciclib partially abrogates ER signaling activation induced by pyrotinib in HER2+HR+ breast cancer
Source: eLife. 2023 Jan 5;12:e85246. doi: 10.7554/eLife.85246 (PMC9822241; doi:10.7554/eLife.85246)
Supplement: Figure 2—figure supplement 1—source data 2. [file elife-85246-fig2-figsupp1-data2.xlsx]

## Sheet: Sheet1
		trastuzumab			trastuzumab+taxmoxifen			trastuzumab+dalpiciclib			3 combination
		nuclear	cytoplasm		nuclear	cytoplasm		nuclear	cytoplasm		nuclear	cytoplasm
		91.6	8.4		80	20		27.3	72.7		40	60
		100	0		100	0		25	75		30.7	69.3
		77.8	22.2		83.3	16.7		25	75		25	75
		81.6	18.4		80.91	19.09		13.3	86.7		0	100
		70.9	29.1		66.7	33.3		18.9	81.1		27.8	72.2
