# Supplementary material for: Dalpiciclib partially abrogates ER signaling activation induced by pyrotinib in HER2+HR+ breast cancer
Source: eLife. 2023 Jan 5;12:e85246. doi: 10.7554/eLife.85246 (PMC9822241; doi:10.7554/eLife.85246)
Supplement: Figure 2—source data 1. [file elife-85246-fig2-data1.xlsx]

## Sheet: Sheet1
	DMSO ctrl				pyrotinib				tamoxifen				dalpiciclib		Figure 2 a	cell ratio	pyrotinib+tamoxifen				pyrotinib+dalpiciclib				dalpiciclib+tamoxifen				3 drug combination
	nuclear	cytoplasm			nuclear	cytoplasm			nuclear	cytoplasm			nuclear	cytoplasm			nuclear	cytoplasm			nuclear	cytoplasm			nuclear	cytoplasm			nuclear	cytoplasm
distribution ratio	8.64	91.36			83.33	16.67			12.5	87.5			6.67	93.33			76.47	23.53			76.47	23.53			7.14	92.86			76.74	23.26
distribution ratio	6.52	93.48			88.89	11.11			13.33	66.67			0	100			80	20			83.33	16.67			14.81	85.19			71.43	28.57
distribution ratio	11.76	88.24			85.71	14.29			12.5	87.5			10.71	89.29			88.89	11.11			66.67	33.33			5.89	94.11			68.18	31.82
distribution ratio	10.87	89.13			80	20			20	80			0	100			75.76	24.24			73.17	26.83			13.33	86.67			76.67	23.33
distribution ratio	10	90			72.72	27.27			15.15	84.85			4.76	95.24			75	25			73.68	26.32			8.7	91.3			60.71	39.29
															Figure 2 c				ER unchanged or reduced	ER elevated
																		clinical trial(pyrotinib+letrozole+dalpiciclib)	92	7
																		only received chemotherapy	76	23
																		trastuzumab+chemotherapy	61	39
