# Supplementary material for: Dalpiciclib partially abrogates ER signaling activation induced by pyrotinib in HER2+HR+ breast cancer
Source: eLife. 2023 Jan 5;12:e85246. doi: 10.7554/eLife.85246 (PMC9822241; doi:10.7554/eLife.85246)
Supplement: Figure 3—source data 1. [file elife-85246-fig3-data1.xlsx]

## Sheet: Sheet1
genelist
ESR1
ESR2
HSP90AA1
HSP90AB1
HSP90B
FKBP4
FKBP5
HSPA8
HSPA1A
HSPA2
HSPA1L
HSPA1B
HSPA6
NOCA1
NOCA2
NOCA3
BCL2
EBAG9
KRT9
KRT10
KRT12
KRT13
KRT14
KRT15
KRT16
KRT17
KRT18
KRT19
KRT31
KRT32
KRT33A
KRT33B
KRT34
KRT35
KRT40
KRT39
KRT23
KRT25
KRT28
KRT24
KRT27
KRT20
KRT38
KRT37
KRT36
KRT26
CTSD
TFF1
PGR
TGFA
RARA
FOS
JUN
SP1
GPER1
GNAS
SRC
MMP2
MMP9
HBEGF
ADCY1
ADCY2
ADCY3
ADCY4
ACDY5
ADCY6
ADCY7
ADCY8
ADCY9
PKA
CREB1
ATF2
ATF4
CREB3
CREB3L1
CREB3L2
CREB3L3
CREB3L4
CREB5
ATF6B
EGFR
SHC1
SHC2
SHC3
SHC4
GRB2
SOS
HRAS
KRAS
NRAS
RAF1
MAP2K1
MAP2K2
ERK1
ERK2
PIK3CA
PIK3CD
PIK3CB
PIK3R1
PIK3R2
PIK3R3
AKT1
AKT2
AKT3
GABBR1
GABBR2
GNAI1
GNAI3
GNAI2
GNAO
KCNJ3
KCNJ6
KCNJ15
OPRM1
PRKCD
GNAQ
PLCB1
PLCB2
PLCB3
PLCB4
ITPR1
ITPR2
ITPR3
CALML3
CALML5
CALM2
CALM3
CALML6
CALML4
NOS3
GRM1
