# Supplementary material for: Dalpiciclib partially abrogates ER signaling activation induced by pyrotinib in HER2+HR+ breast cancer
Source: eLife. 2023 Jan 5;12:e85246. doi: 10.7554/eLife.85246 (PMC9822241; doi:10.7554/eLife.85246)
Supplement: Figure 3—source data 2. [file elife-85246-fig3-data2.xlsx]

## Sheet: Sheet1
genelist
CCND1
CCND2
CCND3
CDK4
CDK6
RB1
RBL1
RBL2
ABL1
HDAC1
HDAC2
E2F1
E2F2
E2F3
E2F4
E2F5
TFDP1
TFDP2
GSK3B
TGFB1
TGFB2
TGFB3
SAMD2
SAMD4
MYC
ZBTB17
CDKN2A
CDKN2B
CDKN2C
CDKN2D
CDKN1B
CDKN1C
CDKN1A
CCNE
CDK2
SKP1
CUL1
RBX1
SKP2
CCNA
CDC6
CDC45
CDC7
DBF4
CDK1
CCNB1
CCNB2
CCNB3
CDC25B
CDC25C
YWHAZ
YWHAB
YWHAQ
YWHAE
YWHAG
YWHAH
PLK1
WEE1
WEE2
PKMYT
CCNH
CDK7
APC1
APC2
APC3
APC4
APC5
APC6
APC7
APC8
APC9
APC10
APC11
APC12
APC13
CDC20
PTTG
ESP1
SMC1A
SMC1B
SMC3
STAG1
STAG2
SCC1
TTK
BUB1
BUB3
BUB1B
MAD1L
MAD2
MAD2L2
CDH1
CDC14B
CDC14A
ATR
ATM
TP53
CHEK1
CHEK2
CREBBP
EP300
PRKDC
MDM2
GADD45A
GADD45B
GADD45G
PCNA
SFN
CDC25A
ORC1
ORC2
ORC3
