# Supplementary material for: Dalpiciclib partially abrogates ER signaling activation induced by pyrotinib in HER2+HR+ breast cancer
Source: eLife. 2023 Jan 5;12:e85246. doi: 10.7554/eLife.85246 (PMC9822241; doi:10.7554/eLife.85246)
Supplement: Figure 3—source data 3. [file elife-85246-fig3-data3.xls]

#ID	gene_name	A1_FPKM	A1_count	A2_FPKM	A2_count	A3_FPKM	A3_count	Ctrl1_FPKM	Ctrl1_count	Ctrl2_FPKM	Ctrl2_count	Ctrl3_FPKM	Ctrl3_count	Pvalue	log2FC	regulated	COG_class	COG_class_annotation	GO_annotation	KEGG_annotation	KEGG_pathway_annotation	KOG_class	KOG_class_annotation	Pfam_annotation	Swiss_Prot_annotation	eggNOG_class	eggNOG_class_annotation	NR_annotation	GO_second_level_annotation
ENSG00000079689	SCGN	19.656457	911	19.343913	843	19.158906	1013	4.278617	253	7.711128	347	6.010809	334	2.70E-17	1.542537918	up	--	--	Molecular Function: molecular_function (GO:0003674);; Molecular Function: binding (GO:0005488);; Molecular Function: calcium ion binding (GO:0005509);; Cellular Component: cellular_component (GO:0005575);; Cellular Component: intracellular (GO:0005622);; Cellular Component: cell (GO:0005623);; Cellular Component: nucleus (GO:0005634);; Cellular Component: cytoplasm (GO:0005737);; Cellular Compone…	K14757|2.4e-42|oaa:100076843|K14757 calbindin | (RefSeq) CALB1; calbindin	Endocrine and other factor-regulated calcium reabsorption (ko04961)	[T]	Signal transduction mechanisms	EF hand	Secretagogin OS=Homo sapiens OX=9606 GN=SCGN PE=1 SV=2	T	Signal transduction mechanisms	secretagogin [Homo sapiens]	molecular function: binding (GO:0005488);; cellular component: cell (GO:0005623);; cellular component: cell part (GO:0044464);; cellular component: organelle (GO:0043226);; cellular component: cell junction (GO:0030054);; biological process: cellular process (GO:0009987);; biological process: single-organism process (GO:0044699);; biological process: biological regulation (GO:0065007);; cellular …
ENSG00000008517	IL32	9.551409	371	4.431043	156	8.909916	392	1.999388	98	1.542317	61	2.356108	101	9.18E-08	1.418415889	up	--	--	Biological Process: immune response (GO:0006955);;	K22632|1.0e-100|pps:100967233|K22632 interleukin 32 | (RefSeq) IL32; interleukin-32	Cytokine-cytokine receptor interaction (ko04060)	--	--	Interleukin 32	Interleukin-32 OS=Homo sapiens OX=9606 GN=IL32 PE=1 SV=3	T	Signal transduction mechanisms	interleukin-32 isoform B [Homo sapiens]	biological process: immune system process (GO:0002376);; biological process: response to stimulus (GO:0050896)
ENSG00000169429	CXCL8	21.58968	1339	14.402479	798	20.00215	1375	5.642803	369	4.574852	285	8.473226	525	3.26E-10	1.416983546	up	--	--	Molecular Function: interleukin-8 receptor binding (GO:0005153);; Cellular Component: extracellular space (GO:0005615);; Biological Process: inflammatory response (GO:0006954);; Biological Process: immune response (GO:0006955);; Molecular Function: chemokine activity (GO:0008009);; Biological Process: neutrophil chemotaxis (GO:0030593);; Biological Process: neutrophil activation (GO:0042119);;	K10030|8.1e-49|ggo:101130732|K10030 interleukin 8 | (RefSeq) CXCL8; interleukin-8	Cytokine-cytokine receptor interaction (ko04060);; Viral protein interaction with cytokine and cytokine receptor (ko04061);; Chemokine signaling pathway (ko04062);; NF-kappa B signaling pathway (ko04064);; Phospholipase D signaling pathway (ko04072);; Cellular senescence (ko04218);; Toll-like receptor signaling pathway (ko04620);; NOD-like receptor signaling pathway (ko04621);; RIG-I-like recepto…	--	--	Small cytokines (intecrine/chemokine), interleukin-8 like	Interleukin-8 OS=Homo sapiens OX=9606 GN=CXCL8 PE=1 SV=1	O	Posttranslational modification, protein turnover, chaperones	interleukin-8 isoform 1 precursor [Homo sapiens]	molecular function: binding (GO:0005488);; cellular component: extracellular region (GO:0005576);; cellular component: extracellular region part (GO:0044421);; biological process: response to stimulus (GO:0050896);; biological process: immune system process (GO:0002376);; biological process: cellular process (GO:0009987);; biological process: locomotion (GO:0040011);; biological process: single-o…
ENSG00000108691	CCL2	2.863784	80	1.889289	48	1.661491	51	0.161572	6	0	0	0.210715	7	1.44E-06	1.416349591	up	--	--	Cellular Component: extracellular space (GO:0005615);; Biological Process: immune response (GO:0006955);; Molecular Function: chemokine activity (GO:0008009);;	K14624|4.7e-49|ggo:101134802|K14624 C-C motif chemokine 2 | (RefSeq) CCL2; C-C motif chemokine 2	Cytokine-cytokine receptor interaction (ko04060);; Viral protein interaction with cytokine and cytokine receptor (ko04061);; Chemokine signaling pathway (ko04062);; NOD-like receptor signaling pathway (ko04621);; IL-17 signaling pathway (ko04657);; TNF signaling pathway (ko04668);; AGE-RAGE signaling pathway in diabetic complications (ko04933);; Yersinia infection (ko05135);; Chagas disease (ko05…	--	--	Small cytokines (intecrine/chemokine), interleukin-8 like	C-C motif chemokine 2 OS=Homo sapiens OX=9606 GN=CCL2 PE=1 SV=1	T	Signal transduction mechanisms	C-C motif chemokine 2 precursor [Homo sapiens]	cellular component: extracellular region (GO:0005576);; cellular component: extracellular region part (GO:0044421);; biological process: immune system process (GO:0002376);; biological process: response to stimulus (GO:0050896);; molecular function: binding (GO:0005488)
ENSG00000186352	ANKRD37	7.878439	319	11.29032	421	13.939198	614	2.843159	118	5.060355	187	3.324783	138	3.22E-09	1.407815971	up	--	--	Cellular Component: cellular_component (GO:0005575);; Cellular Component: intracellular (GO:0005622);; Cellular Component: cell (GO:0005623);; Cellular Component: nucleus (GO:0005634);; Cellular Component: cytoplasm (GO:0005737);; Cellular Component: mitochondrion (GO:0005739);; Cellular Component: cytosol (GO:0005829);; Cellular Component: organelle (GO:0043226);; Cellular Component: membrane-bo…	K11967|3.6e-06|pdam:113681834|K11967 ankyrin repeat and IBR domain-containing protein 1 [EC:2.3.2.31] | (RefSeq) ankyrin repeat and IBR domain-containing protein 1-like	--	--	--	Ankyrin repeats (3 copies)	Ankyrin repeat domain-containing protein 37 OS=Homo sapiens OX=9606 GN=ANKRD37 PE=1 SV=1	S	Function unknown	ankyrin repeat domain-containing protein 37 [Homo sapiens]	cellular component: cell (GO:0005623);; cellular component: cell part (GO:0044464);; cellular component: organelle (GO:0043226)
ENSG00000104419	NDRG1	181.495936	19766	270.070534	26334	214.669234	25903	57.660955	6948	72.037777	7849	103.181932	11656	1.68E-11	1.38143787	up	--	--	Biological Process: peripheral nervous system myelin maintenance (GO:0032287);; Biological Process: regulation of cell proliferation (GO:0042127);; Biological Process: mast cell activation (GO:0045576);;	K18266|8.3e-214|hsa:10397|K18266 protein NDRG1 | (RefSeq) NDRG1, CAP43, CMT4D, DRG-1, DRG1, GC4, HMSNL, NDR1, NMSL, PROXY1, RIT42, RTP, TARG1, TDD5; N-myc downstream regulated 1	--	[S]	Function unknown	Ndr family	Protein NDRG1 OS=Homo sapiens OX=9606 GN=NDRG1 PE=1 SV=1	S	Function unknown	protein NDRG1 isoform 1 [Homo sapiens]	biological process: cellular process (GO:0009987);; biological process: multicellular organismal process (GO:0032501);; biological process: developmental process (GO:0032502);; biological process: single-organism process (GO:0044699);; biological process: cellular component organization or biogenesis (GO:0071840);; biological process: biological regulation (GO:0065007);; biological process: immun…
Homo_sapiens_newGene_10589	--	2.97242	255	6.209582	474	4.548673	429	1.017822	96	1.358141	116	1.846188	164	1.95E-07	1.33882793	up	--	--	--	--	--	--	--	--	--	--	--	--	--
Homo_sapiens_newGene_1336	--	0.61197	99	0.272343	40	0.426712	76	0.125911	23	0.046227	8	0.040198	7	2.02E-05	1.269665662	up	--	--	Molecular Function: nucleic acid binding (GO:0003676);; Molecular Function: RNA-directed DNA polymerase activity (GO:0003964);; Molecular Function: RNA-DNA hybrid ribonuclease activity (GO:0004523);;	--	--	[R]	General function prediction only	Reverse transcriptase (RNA-dependent DNA polymerase)	Endogenous retrovirus group K member 113 Pol protein OS=Homo sapiens OX=9606 GN=HERVK_113 PE=3 SV=1	L	Replication, recombination and repair	RecName: Full=Endogenous retrovirus group K member 113 Pol protein; AltName: Full=HERV-K113 Pol protein; AltName: Full=HERV-K_19p13.11 provirus ancestral Pol protein; Includes: RecName: Full=Reverse transcriptase; Short=RT; Includes: RecName: Full=Ribonuclease H; Short=RNase H; Includes: RecName: Full=Integrase; Short=IN [Homo sapiens]	molecular function: binding (GO:0005488);; biological process: metabolic process (GO:0008152);; biological process: cellular process (GO:0009987);; molecular function: catalytic activity (GO:0003824)
Homo_sapiens_newGene_7218	--	3.865664	98	9.626969	217	6.226673	173	1.581855	44	2.609691	66	1.681862	44	1.04E-05	1.232745147	up	--	--	--	--	--	--	--	--	--	--	--	interleukin-15 isoform X1 [Pan troglodytes]	--
ENSG00000187837	HIST1H1C	21.947571	523	29.49225	627	26.019621	683	8.260006	217	10.244638	244	12.321094	304	1.40E-09	1.229036346	up	--	--	Biological Process: negative regulation of transcription from RNA polymerase II promoter (GO:0000122);; Cellular Component: nuclear nucleosome (GO:0000788);; Molecular Function: double-stranded DNA binding (GO:0003690);; Molecular Function: calcium ion binding (GO:0005509);; Molecular Function: ATP binding (GO:0005524);; Molecular Function: GTP binding (GO:0005525);; Biological Process: nucleosom…	K11275|2.4e-58|ggo:101128825|K11275 histone H1/5 | (RefSeq) H1-2; histone H1.2	--	[B]	Chromatin structure and dynamics	linker histone H1 and H5 family	Histone H1.2 OS=Homo sapiens OX=9606 GN=H1-2 PE=1 SV=2	B	Chromatin structure and dynamics	histone H1.2 [Pan troglodytes]	biological process: biological regulation (GO:0065007);; cellular component: cell (GO:0005623);; cellular component: membrane-enclosed lumen (GO:0031974);; cellular component: macromolecular complex (GO:0032991);; cellular component: organelle (GO:0043226);; cellular component: organelle part (GO:0044422);; cellular component: cell part (GO:0044464);; molecular function: binding (GO:0005488);; bi…
ENSG00000084636	COL16A1	0.643499	137	0.510659	97	0.459591	108	0.106678	25	0.114436	25	0.228914	51	2.12E-05	1.213986291	up	--	--	Biological Process: reproduction (GO:0000003);; Biological Process: response to acid chemical (GO:0001101);; Biological Process: regulation of cell-matrix adhesion (GO:0001952);; Biological Process: positive regulation of cell-matrix adhesion (GO:0001954);; Molecular Function: molecular_function (GO:0003674);; Molecular Function: receptor binding (GO:0005102);; Molecular Function: integrin bindin…	K24339|6.5e-257|hsa:1307|K24339 collagen type XVI alpha | (RefSeq) COL16A1, 447AA, FP1572; collagen type XVI alpha 1 chain	Protein digestion and absorption (ko04974)	[W]	Extracellular structures	Collagen triple helix repeat (20 copies)	Collagen alpha-1(XVI) chain OS=Homo sapiens OX=9606 GN=COL16A1 PE=1 SV=2	W	Extracellular structures	collagen alpha-1(XVI) chain precursor [Homo sapiens]	biological process: reproduction (GO:0000003);; biological process: response to stimulus (GO:0050896);; biological process: biological regulation (GO:0065007);; molecular function: binding (GO:0005488);; cellular component: extracellular region (GO:0005576);; cellular component: macromolecular complex (GO:0032991);; cellular component: cell (GO:0005623);; cellular component: cell part (GO:0044464…
ENSG00000122861	PLAU	2.862679	248	1.87815	145	3.167448	302	0.697924	69	0.57522	57	1.266824	114	1.06E-05	1.184401495	up	[O]	Posttranslational modification, protein turnover, chaperones	Molecular Function: serine-type endopeptidase activity (GO:0004252);; Cellular Component: extracellular region (GO:0005576);; Biological Process: plasminogen activation (GO:0031639);;	K01348|1.6e-255|nle:100581844|K01348 urokinase plasminogen activator [EC:3.4.21.73] | (RefSeq) PLAU; urokinase-type plasminogen activator	NF-kappa B signaling pathway (ko04064);; Complement and coagulation cascades (ko04610);; Transcriptional misregulation in cancer (ko05202);; Proteoglycans in cancer (ko05205);; MicroRNAs in cancer (ko05206);; Prostate cancer (ko05215)	--	--	Trypsin	Urokinase-type plasminogen activator OS=Homo sapiens OX=9606 GN=PLAU PE=1 SV=2	O	Posttranslational modification, protein turnover, chaperones	urokinase-type plasminogen activator isoform 2 [Homo sapiens]	biological process: metabolic process (GO:0008152);; molecular function: catalytic activity (GO:0003824);; cellular component: extracellular region (GO:0005576)
ENSG00000134107	BHLHE40	10.160729	1310	12.989904	1492	11.121902	1578	4.373693	620	5.346642	687	5.386893	717	1.88E-13	1.17887128	up	--	--	Molecular Function: RNA polymerase II activating transcription factor binding (GO:0001102);; Molecular Function: transcriptional repressor activity, RNA polymerase II transcription regulatory region sequence-specific binding (GO:0001227);; Molecular Function: transcription corepressor activity (GO:0003714);; Cellular Component: nuclear body (GO:0016604);; Biological Process: circadian regulation …	K03729|3.1e-235|ggo:101151761|K03729 class B basic helix-loop-helix protein 2 | (RefSeq) BHLHE40; class E basic helix-loop-helix protein 40	Circadian rhythm (ko04710)	[K]	Transcription	Helix-loop-helix DNA-binding domain	Class E basic helix-loop-helix protein 40 OS=Homo sapiens OX=9606 GN=BHLHE40 PE=1 SV=1	K	Transcription	class E basic helix-loop-helix protein 40 [Homo sapiens]	molecular function: binding (GO:0005488);; biological process: biological regulation (GO:0065007);; molecular function: nucleic acid binding transcription factor activity (GO:0001071);; molecular function: transcription factor activity, protein binding (GO:0000988);; cellular component: cell (GO:0005623);; cellular component: membrane-enclosed lumen (GO:0031974);; cellular component: organelle (G…
ENSG00000131069	ACSS2	353.046683	39605	418.013656	41571	364.595294	44855	151.863486	18845	169.1325	18919	192.895956	22348	3.77E-16	1.157432909	up	[I]	Lipid transport and metabolism	Molecular Function: acetate-CoA ligase activity (GO:0003987);; Molecular Function: ATP binding (GO:0005524);; Molecular Function: AMP binding (GO:0016208);; Biological Process: acetyl-CoA biosynthetic process from acetate (GO:0019427);;	K01895|0.0e+00|hsa:55902|K01895 acetyl-CoA synthetase [EC:6.2.1.1] | (RefSeq) ACSS2, ACAS2, ACECS, ACS, ACSA, AceCS1, dJ1161H23.1; acyl-CoA synthetase short chain family member 2	Glycolysis / Gluconeogenesis (ko00010);; Pyruvate metabolism (ko00620);; Glyoxylate and dicarboxylate metabolism (ko00630);; Propanoate metabolism (ko00640);; Carbon metabolism (ko01200)	[I]	Lipid transport and metabolism	AMP-binding enzyme	Acetyl-coenzyme A synthetase, cytoplasmic OS=Homo sapiens OX=9606 GN=ACSS2 PE=1 SV=1	I	Lipid transport and metabolism	acetyl-coenzyme A synthetase, cytoplasmic isoform 1 [Homo sapiens]	molecular function: catalytic activity (GO:0003824);; molecular function: binding (GO:0005488);; biological process: metabolic process (GO:0008152);; biological process: cellular process (GO:0009987);; biological process: single-organism process (GO:0044699)
ENSG00000167508	MVD	257.686313	16570	294.56379	16759	276.525308	19431	118.86977	8447	119.184485	7585	143.501802	9379	4.00E-17	1.149225134	up	[I]	Lipid transport and metabolism	Biological Process: isoprenoid biosynthetic process (GO:0008299);; Molecular Function: carboxy-lyase activity (GO:0016831);;	K01597|3.8e-230|hsa:4597|K01597 diphosphomevalonate decarboxylase [EC:4.1.1.33] | (RefSeq) MVD, FP17780, MDDase, MPD, POROK7; mevalonate diphosphate decarboxylase	Terpenoid backbone biosynthesis (ko00900)	[I]	Lipid transport and metabolism	Mevalonate 5-diphosphate decarboxylase C-terminal domain	Diphosphomevalonate decarboxylase OS=Homo sapiens OX=9606 GN=MVD PE=1 SV=1	I	Lipid transport and metabolism	diphosphomevalonate decarboxylase [Homo sapiens]	biological process: metabolic process (GO:0008152);; biological process: cellular process (GO:0009987);; biological process: single-organism process (GO:0044699);; molecular function: catalytic activity (GO:0003824)
ENSG00000090339	ICAM1	4.208097	508	2.458931	265	3.215824	428	0.946757	126	0.975123	118	1.843315	230	2.14E-05	1.101331573	up	--	--	Biological Process: ovarian follicle development (GO:0001541);; Cellular Component: immunological synapse (GO:0001772);; Biological Process: response to amphetamine (GO:0001975);; Biological Process: acute inflammatory response to antigenic stimulus (GO:0002438);; Biological Process: T cell antigen processing and presentation (GO:0002457);; Molecular Function: integrin binding (GO:0005178);; Cell…	K06490|3.8e-310|hsa:3383|K06490 intercellular adhesion molecule 1 | (RefSeq) ICAM1, BB2, CD54, P3.58; intercellular adhesion molecule 1	NF-kappa B signaling pathway (ko04064);; Cell adhesion molecules (ko04514);; Natural killer cell mediated cytotoxicity (ko04650);; TNF signaling pathway (ko04668);; Leukocyte transendothelial migration (ko04670);; AGE-RAGE signaling pathway in diabetic complications (ko04933);; African trypanosomiasis (ko05143);; Malaria (ko05144);; Staphylococcus aureus infection (ko05150);; Influenza A (ko05164…	--	--	Intercellular adhesion molecule (ICAM), N-terminal domain	Intercellular adhesion molecule 1 OS=Homo sapiens OX=9606 GN=ICAM1 PE=1 SV=2	T	Signal transduction mechanisms	intercellular adhesion molecule 1 precursor [Homo sapiens]	biological process: reproduction (GO:0000003);; biological process: reproductive process (GO:0022414);; biological process: multicellular organismal process (GO:0032501);; biological process: developmental process (GO:0032502);; biological process: single-organism process (GO:0044699);; biological process: rhythmic process (GO:0048511);; cellular component: cell (GO:0005623);; cellular component:…
ENSG00000196126	HLA-DRB1	3.069293	140	3.191242	130	2.518945	127	1.20481	61	1.100593	50	1.195858	57	8.32E-06	1.101235185	up	--	--	Biological Process: immune response (GO:0006955);; Cellular Component: integral component of membrane (GO:0016021);; Biological Process: antigen processing and presentation (GO:0019882);; Cellular Component: MHC class II protein complex (GO:0042613);;	K06752|8.6e-146|rro:104673868|K06752 MHC class II antigen | (RefSeq) HLA class II histocompatibility antigen, DRB1-10 beta chain	Phagosome (ko04145);; Cell adhesion molecules (ko04514);; Antigen processing and presentation (ko04612);; Hematopoietic cell lineage (ko04640);; Th1 and Th2 cell differentiation (ko04658);; Th17 cell differentiation (ko04659);; Intestinal immune network for IgA production (ko04672);; Type I diabetes mellitus (ko04940);; Leishmaniasis (ko05140);; Toxoplasmosis (ko05145);; Staphylococcus aureus inf…	--	--	Class II histocompatibility antigen, beta domain	HLA class II histocompatibility antigen, DRB1 beta chain OS=Homo sapiens OX=9606 GN=HLA-DRB1 PE=1 SV=2	T	Signal transduction mechanisms	major histocompatibility complex, class II, DR beta 1 precursor precursor [Homo sapiens]	biological process: immune system process (GO:0002376);; biological process: response to stimulus (GO:0050896);; cellular component: membrane (GO:0016020);; cellular component: membrane part (GO:0044425);; cellular component: cell (GO:0005623);; cellular component: macromolecular complex (GO:0032991);; cellular component: cell part (GO:0044464)
ENSG00000118503	TNFAIP3	2.274017	393	1.597806	231	2.480812	417	0.736019	141	0.85638	114	1.509266	186	4.13E-06	1.101122369	up	--	--	Molecular Function: DNA binding (GO:0003677);; Molecular Function: zinc ion binding (GO:0008270);; Biological Process: protein ubiquitination (GO:0016567);; Biological Process: protein deubiquitination (GO:0016579);;	K11859|0.0e+00|hsa:7128|K11859 tumor necrosis factor, alpha-induced protein 3 [EC:3.4.19.12] | (RefSeq) TNFAIP3, A20, AISBL, OTUD7C, TNFA1P2; TNF alpha induced protein 3	NF-kappa B signaling pathway (ko04064);; Necroptosis (ko04217);; NOD-like receptor signaling pathway (ko04621);; IL-17 signaling pathway (ko04657);; TNF signaling pathway (ko04668);; Measles (ko05162);; Epstein-Barr virus infection (ko05169)	[T]	Signal transduction mechanisms	A20-like zinc finger	Tumor necrosis factor alpha-induced protein 3 OS=Homo sapiens OX=9606 GN=TNFAIP3 PE=1 SV=1	K	Transcription	tumor necrosis factor alpha-induced protein 3 [Homo sapiens]	molecular function: binding (GO:0005488);; biological process: metabolic process (GO:0008152);; biological process: cellular process (GO:0009987)
ENSG00000169245	CXCL10	4.632564	203	2.152795	84	2.840668	137	1.202097	58	1.165269	51	1.134663	52	7.65E-05	1.081903471	up	--	--	Molecular Function: G-protein coupled receptor binding (GO:0001664);; Biological Process: cell activation (GO:0001775);; Biological Process: cell killing (GO:0001906);; Biological Process: regulation of protein phosphorylation (GO:0001932);; Biological Process: response to molecule of bacterial origin (GO:0002237);; Biological Process: immune effector process (GO:0002252);; Biological Process: im…	K12671|1.3e-46|hsa:3627|K12671 C-X-C motif chemokine 10 | (RefSeq) CXCL10, C7, IFI10, INP10, IP-10, SCYB10, crg-2, gIP-10, mob-1; C-X-C motif chemokine ligand 10	Cytokine-cytokine receptor interaction (ko04060);; Viral protein interaction with cytokine and cytokine receptor (ko04061);; Chemokine signaling pathway (ko04062);; Toll-like receptor signaling pathway (ko04620);; RIG-I-like receptor signaling pathway (ko04622);; Cytosolic DNA-sensing pathway (ko04623);; IL-17 signaling pathway (ko04657);; TNF signaling pathway (ko04668);; Hepatitis C (ko05160);;…	--	--	Small cytokines (intecrine/chemokine), interleukin-8 like	C-X-C motif chemokine 10 OS=Homo sapiens OX=9606 GN=CXCL10 PE=1 SV=2	O	Posttranslational modification, protein turnover, chaperones	C-X-C motif chemokine 10 precursor [Homo sapiens]	molecular function: binding (GO:0005488);; biological process: cellular process (GO:0009987);; biological process: single-organism process (GO:0044699);; biological process: cell killing (GO:0001906);; biological process: biological regulation (GO:0065007);; biological process: response to stimulus (GO:0050896);; biological process: immune system process (GO:0002376);; biological process: multice…
ENSG00000160326	SLC2A6	7.418574	678	4.583237	380	5.173618	523	2.225143	223	2.134071	196	3.083687	299	3.49E-06	1.059566004	up	[G]	Carbohydrate transport and metabolism	Cellular Component: integral component of membrane (GO:0016021);; Molecular Function: transmembrane transporter activity (GO:0022857);;	K08144|5.8e-284|hsa:11182|K08144 MFS transporter, SP family, solute carrier family 2 (facilitated glucose transporter), member 6 | (RefSeq) SLC2A6, GLUT6, GLUT9, HSA011372; solute carrier family 2 member 6	--	[R]	General function prediction only	Sugar (and other) transporter	Solute carrier family 2, facilitated glucose transporter member 6 OS=Homo sapiens OX=9606 GN=SLC2A6 PE=1 SV=2	P	Inorganic ion transport and metabolism	solute carrier family 2, facilitated glucose transporter member 6 isoform 1 [Homo sapiens]	cellular component: membrane (GO:0016020);; cellular component: membrane part (GO:0044425);; biological process: localization (GO:0051179);; molecular function: transporter activity (GO:0005215)
ENSG00000155926	SLA	0.53856	60	0.501824	45	0.460737	65	0.096914	13	0.190783	25	0.093022	13	0.000388459	1.048039574	up	--	--	Biological Process: regulation of signal transduction (GO:0009966);;	K08893|3.7e-35|kmr:108246117|K08893 hemopoietic cell kinase [EC:2.7.10.2] | (RefSeq) hck; tyrosine-protein kinase HCK isoform X2	--	--	--	SH2 domain	Src-like-adapter OS=Homo sapiens OX=9606 GN=SLA PE=1 SV=3	T	Signal transduction mechanisms	src-like-adapter isoform a [Homo sapiens]	biological process: biological regulation (GO:0065007)
ENSG00000012223	LTF	10.993143	1215	6.04917	596	9.267302	1127	3.810646	463	3.403097	360	4.892116	559	5.58E-06	1.019898453	up	--	--	Biological Process: regulation of cytokine production (GO:0001817);; Molecular Function: serine-type endopeptidase activity (GO:0004252);; Molecular Function: iron ion binding (GO:0005506);; Cellular Component: extracellular space (GO:0005615);; Cellular Component: cytoplasm (GO:0005737);; Biological Process: antibacterial humoral response (GO:0019731);; Biological Process: antifungal humoral res…	K17283|0.0e+00|hsa:4057|K17283 lactotransferrin [EC:3.4.21.-] | (RefSeq) LTF, GIG12, HEL110, HLF2, LF; lactotransferrin	--	--	--	Transferrin	Lactotransferrin OS=Homo sapiens OX=9606 GN=LTF PE=1 SV=6	K	Transcription	lactotransferrin isoform 1 preproprotein [Homo sapiens]	biological process: biological regulation (GO:0065007);; biological process: metabolic process (GO:0008152);; molecular function: catalytic activity (GO:0003824);; molecular function: binding (GO:0005488);; cellular component: extracellular region (GO:0005576);; cellular component: extracellular region part (GO:0044421);; cellular component: cell (GO:0005623);; cellular component: cell part (GO:0…
Homo_sapiens_newGene_11702	--	1.027077	87	1.06077	80	1.414832	128	0.618557	59	0.460626	29	0.360555	24	0.000376301	1.012442326	up	--	--	--	K23742|8.6e-15|ptr:449579|K23742 lysine-specific demethylase 6C [EC:1.14.11.68] | (RefSeq) UTY; histone demethylase UTY	--	--	--	--	UPF0764 protein C16orf89 OS=Homo sapiens OX=9606 GN=C16orf89 PE=1 SV=2	--	--	similar to zinc finger protein 569, isoform CRA_a [Homo sapiens]	--
ENSG00000174080	CTSF	5.002063	378	4.453377	300	4.869914	405	1.749882	140	2.786099	210	2.363654	177	2.09E-06	1.011886931	up	[O]	Posttranslational modification, protein turnover, chaperones	Molecular Function: cysteine-type peptidase activity (GO:0008234);;	K01373|6.5e-285|hsa:8722|K01373 cathepsin F [EC:3.4.22.41] | (RefSeq) CTSF, CATSF, CLN13; cathepsin F	Lysosome (ko04142);; Apoptosis (ko04210)	[O]	Posttranslational modification, protein turnover, chaperones	Papain family cysteine protease	Cathepsin F OS=Homo sapiens OX=9606 GN=CTSF PE=1 SV=1	O	Posttranslational modification, protein turnover, chaperones	cathepsin F precursor [Homo sapiens]	biological process: metabolic process (GO:0008152);; molecular function: catalytic activity (GO:0003824)
ENSG00000179094	PER1	2.617539	449	2.948246	447	3.538626	648	1.32154	249	1.225783	214	1.714776	306	9.28E-07	0.999434783	up	--	--	Biological Process: negative regulation of transcription from RNA polymerase II promoter (GO:0000122);; Molecular Function: transcription regulatory region sequence-specific DNA binding (GO:0000976);; Molecular Function: RNA polymerase II regulatory region sequence-specific DNA binding (GO:0000977);; Molecular Function: RNA polymerase II core promoter proximal region sequence-specific DNA binding…	K21944|0.0e+00|hsa:5187|K21944 period circadian protein 1 | (RefSeq) PER1, PER, RIGUI, hPER; period circadian regulator 1	Circadian rhythm (ko04710);; Circadian entrainment (ko04713)	[T]	Signal transduction mechanisms	Period protein 2/3C-terminal region	Period circadian protein homolog 1 OS=Homo sapiens OX=9606 GN=PER1 PE=1 SV=2	K	Transcription	period circadian protein homolog 1 [Homo sapiens]	biological process: biological regulation (GO:0065007);; molecular function: binding (GO:0005488);; cellular component: cell (GO:0005623);; cellular component: cell part (GO:0044464);; cellular component: organelle (GO:0043226);; cellular component: organelle part (GO:0044422);; biological process: cellular process (GO:0009987);; biological process: cellular component organization or biogenesis (…
ENSG00000114268	PFKFB4	14.81401	1970	21.490699	2543	18.070963	2645	8.088674	1119	7.615471	1010	11.133583	1529	3.43E-07	0.992556565	up	[E]	Amino acid transport and metabolism	Molecular Function: 6-phosphofructo-2-kinase activity (GO:0003873);; Molecular Function: ATP binding (GO:0005524);; Biological Process: fructose metabolic process (GO:0006000);; Biological Process: fructose 2,6-bisphosphate metabolic process (GO:0006003);;	K19030|7.0e-276|hsa:5210|K19030 6-phosphofructo-2-kinase / fructose-2,6-biphosphatase 4 [EC:2.7.1.105 3.1.3.46] | (RefSeq) PFKFB4; 6-phosphofructo-2-kinase/fructose-2,6-biphosphatase 4	Fructose and mannose metabolism (ko00051);; AMPK signaling pathway (ko04152)	[G]	Carbohydrate transport and metabolism	6-phosphofructo-2-kinase	6-phosphofructo-2-kinase/fructose-2,6-bisphosphatase 4 OS=Homo sapiens OX=9606 GN=PFKFB4 PE=1 SV=6	G	Carbohydrate transport and metabolism	6-phosphofructo-2-kinase/fructose-2,6-bisphosphatase 4 isoform b [Homo sapiens]	biological process: metabolic process (GO:0008152);; biological process: cellular process (GO:0009987);; molecular function: catalytic activity (GO:0003824);; molecular function: binding (GO:0005488);; biological process: single-organism process (GO:0044699)
ENSG00000196136	SERPINA3	54.239454	3302	34.209055	1835	46.940257	3037	18.544376	1200	17.622539	1049	28.387549	1753	4.19E-06	0.990545949	up	[O]	Posttranslational modification, protein turnover, chaperones	Cellular Component: extracellular space (GO:0005615);;	K04525|8.3e-236|hsa:12|K04525 serpin A | (RefSeq) SERPINA3, AACT, ACT, GIG24, GIG25; serpin family A member 3	--	[V]	Defense mechanisms	Serpin (serine protease inhibitor)	Alpha-1-antichymotrypsin OS=Homo sapiens OX=9606 GN=SERPINA3 PE=1 SV=2	V	Defense mechanisms	serpin peptidase inhibitor, clade A (alpha-1 antiproteinase, antitrypsin), member 3, isoform CRA_b [Homo sapiens]	cellular component: extracellular region (GO:0005576);; cellular component: extracellular region part (GO:0044421)
ENSG00000181577	C6orf223	0.919332	122	1.651893	187	0.814017	109	0.368329	54	0.377714	46	0.553419	73	0.000369609	0.989380278	up	--	--	--	--	--	--	--	Family of unknown function (DUF5550)	Uncharacterized protein C6orf223 OS=Homo sapiens OX=9606 GN=C6orf223 PE=2 SV=2	S	Function unknown	RecName: Full=Uncharacterized protein C6orf223 [Homo sapiens]	--
ENSG00000127129	EDN2	2.058944	95	4.25081	175	3.073317	156	0.983912	50	0.970221	45	1.629254	78	0.000399527	0.986968794	up	--	--	Biological Process: branching involved in blood vessel morphogenesis (GO:0001569);; Biological Process: in utero embryonic development (GO:0001701);; Biological Process: histamine secretion (GO:0001821);; Cellular Component: extracellular space (GO:0005615);; Biological Process: regulation of pH (GO:0006885);; Biological Process: adenylate cyclase-inhibiting G-protein coupled receptor signaling p…	K16367|3.3e-85|hsa:1907|K16367 endothelin-2 | (RefSeq) EDN2, ET-2, ET2, PPET2; endothelin 2	cAMP signaling pathway (ko04024);; Neuroactive ligand-receptor interaction (ko04080);; Vascular smooth muscle contraction (ko04270);; Renin secretion (ko04924)	--	--	Endothelin family	Endothelin-2 OS=Homo sapiens OX=9606 GN=EDN2 PE=1 SV=2	O	Posttranslational modification, protein turnover, chaperones	endothelin-2 isoform 1 preproprotein [Homo sapiens]	biological process: multicellular organismal process (GO:0032501);; biological process: developmental process (GO:0032502);; biological process: single-organism process (GO:0044699);; biological process: localization (GO:0051179);; cellular component: extracellular region (GO:0005576);; cellular component: extracellular region part (GO:0044421);; biological process: biological regulation (GO:0065…
ENSG00000121552	CSTA	3.11422	88	2.351184	59	2.623049	82	0.876509	28	1.390688	39	0.740925	22	0.000522941	0.985648417	up	--	--	Molecular Function: cysteine-type endopeptidase inhibitor activity (GO:0004869);;	K13907|5.7e-24|hsa:1475|K13907 cystatin-A/B | (RefSeq) CSTA, AREI, PSS4, STF1, STFA; cystatin A	--	--	--	Cystatin domain	Cystatin-A OS=Homo sapiens OX=9606 GN=CSTA PE=1 SV=1	J	Translation, ribosomal structure and biogenesis	CSTA isoform 2 [Pan troglodytes]	biological process: biological regulation (GO:0065007);; molecular function: molecular function regulator (GO:0098772)
Homo_sapiens_newGene_1736	--	0.957345	156	0.865106	120	1.137535	196	0.440915	99	0.485396	60	0.287719	62	0.000100049	0.972377538	up	--	--	--	--	--	--	--	--	--	--	--	--	--
Homo_sapiens_newGene_10626	--	14.389149	1232	45.698015	3486	21.469302	2023	11.363287	1069	10.557059	901	14.377219	1271	0.000226423	0.945119801	up	--	--	--	--	--	--	--	--	--	--	--	hCG1640777, isoform CRA_a [Homo sapiens]	--
ENSG00000104324	CPQ	1.730296	125	1.452562	94	1.60774	128	0.616008	49	0.612064	45	0.895978	67	0.000442683	0.924014166	up	[O]	Posttranslational modification, protein turnover, chaperones	Molecular Function: carboxypeptidase activity (GO:0004180);; Cellular Component: extracellular space (GO:0005615);; Cellular Component: lysosome (GO:0005764);; Cellular Component: endoplasmic reticulum (GO:0005783);; Cellular Component: Golgi apparatus (GO:0005794);; Biological Process: thyroid hormone generation (GO:0006590);; Biological Process: tissue regeneration (GO:0042246);; Cellular Compo…	K01302|7.5e-270|hsa:10404|K01302 carboxypeptidase Q [EC:3.4.17.-] | (RefSeq) CPQ, LDP, PGCP; carboxypeptidase Q	--	[OPR]	Posttranslational modification, protein turnover, chaperones;; Inorganic ion transport and metabolism;; General function prediction only	Peptidase family M28	Carboxypeptidase Q OS=Homo sapiens OX=9606 GN=CPQ PE=1 SV=1	O	Posttranslational modification, protein turnover, chaperones	carboxypeptidase Q preproprotein [Homo sapiens]	biological process: metabolic process (GO:0008152);; molecular function: catalytic activity (GO:0003824);; cellular component: extracellular region (GO:0005576);; cellular component: extracellular region part (GO:0044421);; cellular component: cell (GO:0005623);; cellular component: organelle (GO:0043226);; cellular component: cell part (GO:0044464);; biological process: cellular process (GO:0009…
ENSG00000169583	CLIC3	18.349649	693	23.014061	774	19.104799	794	9.859042	409	8.749462	329	12.596984	491	1.68E-06	0.922085923	up	--	--	Molecular Function: voltage-gated ion channel activity (GO:0005244);; Molecular Function: chloride channel activity (GO:0005254);; Cellular Component: cytoplasm (GO:0005737);; Cellular Component: chloride channel complex (GO:0034707);; Biological Process: regulation of ion transmembrane transport (GO:0034765);;	K05023|2.5e-133|hsa:9022|K05023 chloride intracellular channel protein 3 | (RefSeq) CLIC3; chloride intracellular channel 3	--	[P]	Inorganic ion transport and metabolism	Glutathione S-transferase, C-terminal domain	Chloride intracellular channel protein 3 OS=Homo sapiens OX=9606 GN=CLIC3 PE=1 SV=2	P	Inorganic ion transport and metabolism	chloride intracellular channel protein 3 [Homo sapiens]	biological process: localization (GO:0051179);; biological process: biological regulation (GO:0065007);; molecular function: transporter activity (GO:0005215);; cellular component: cell (GO:0005623);; cellular component: cell part (GO:0044464);; cellular component: membrane (GO:0016020);; cellular component: macromolecular complex (GO:0032991);; cellular component: membrane part (GO:0044425)
ENSG00000104856	RELB	7.703763	654	5.201558	395	6.950992	629	3.342701	311	2.905363	247	3.783245	333	6.53E-06	0.92108648	up	--	--	Molecular Function: DNA binding (GO:0003677);; Molecular Function: transcription factor activity, sequence-specific DNA binding (GO:0003700);; Cellular Component: nucleus (GO:0005634);; Cellular Component: cytoplasm (GO:0005737);; Biological Process: regulation of transcription from RNA polymerase II promoter (GO:0006357);; Cellular Component: host cell nucleus (GO:0042025);;	K09253|0.0e+00|hsa:5971|K09253 transcription factor RelB | (RefSeq) RELB, I-REL, IMD53, IREL, REL-B; RELB proto-oncogene, NF-kB subunit	MAPK signaling pathway (ko04010);; NF-kappa B signaling pathway (ko04064);; Osteoclast differentiation (ko04380);; C-type lectin receptor signaling pathway (ko04625);; Human T-cell leukemia virus 1 infection (ko05166);; Epstein-Barr virus infection (ko05169)	--	--	RelB transactivation domain	Transcription factor RelB OS=Homo sapiens OX=9606 GN=RELB PE=1 SV=2	K	Transcription	transcription factor RelB [Homo sapiens]	molecular function: binding (GO:0005488);; biological process: biological regulation (GO:0065007);; molecular function: nucleic acid binding transcription factor activity (GO:0001071);; cellular component: cell (GO:0005623);; cellular component: organelle (GO:0043226);; cellular component: cell part (GO:0044464);; cellular component: other organism (GO:0044215);; cellular component: other organis…
ENSG00000156564	LRFN2	0.719619	88	0.761331	83	0.716706	96	0.296344	40	0.389612	48	0.28334	36	0.000537864	0.920976371	up	--	--	Cellular Component: cell surface (GO:0009986);; Cellular Component: glutamatergic synapse (GO:0098978);; Cellular Component: GABA-ergic synapse (GO:0098982);; Cellular Component: integral component of postsynaptic density membrane (GO:0099061);; Biological Process: regulation of postsynaptic density assembly (GO:0099151);; Biological Process: synaptic membrane adhesion (GO:0099560);; Biological P…	K16355|0.0e+00|hsa:57497|K16355 leucine-rich repeat and fibronectin type-III domain-containing protein 2 | (RefSeq) LRFN2, FIGLER2, KIAA1246, SALM1; leucine rich repeat and fibronectin type III domain containing 2	--	[R]	General function prediction only	Leucine rich repeat	Leucine-rich repeat and fibronectin type-III domain-containing protein 2 OS=Homo sapiens OX=9606 GN=LRFN2 PE=1 SV=2	T	Signal transduction mechanisms	leucine-rich repeat and fibronectin type-III domain-containing protein 2 precursor [Homo sapiens]	cellular component: cell (GO:0005623);; cellular component: cell part (GO:0044464);; cellular component: synapse (GO:0045202);; cellular component: membrane (GO:0016020);; cellular component: organelle (GO:0043226);; cellular component: organelle part (GO:0044422);; cellular component: membrane part (GO:0044425);; cellular component: synapse part (GO:0044456);; biological process: biological regu…
ENSG00000170525	PFKFB3	9.427525	1479	12.572294	1834	10.69689	1870	5.130892	850	5.670362	872	6.960957	1131	5.79E-07	0.91607254	up	[E]	Amino acid transport and metabolism	Molecular Function: 6-phosphofructo-2-kinase activity (GO:0003873);; Molecular Function: ATP binding (GO:0005524);; Cellular Component: nucleoplasm (GO:0005654);; Biological Process: fructose metabolic process (GO:0006000);; Biological Process: fructose 2,6-bisphosphate metabolic process (GO:0006003);;	K01103|1.9e-298|pon:100172898|K01103 6-phosphofructo-2-kinase / fructose-2,6-biphosphatase 3 [EC:2.7.1.105 3.1.3.46] | (RefSeq) PFKFB3; 6-phosphofructo-2-kinase/fructose-2, 6-bisphosphatase 3 isoform 1	Fructose and mannose metabolism (ko00051);; HIF-1 signaling pathway (ko04066);; AMPK signaling pathway (ko04152)	[G]	Carbohydrate transport and metabolism	6-phosphofructo-2-kinase	6-phosphofructo-2-kinase/fructose-2,6-bisphosphatase 3 OS=Homo sapiens OX=9606 GN=PFKFB3 PE=1 SV=1	G	Carbohydrate transport and metabolism	6-phosphofructo-2-kinase/fructose-2,6-bisphosphatase 3 isoform 4 [Homo sapiens]	biological process: metabolic process (GO:0008152);; biological process: cellular process (GO:0009987);; molecular function: catalytic activity (GO:0003824);; molecular function: binding (GO:0005488);; cellular component: cell (GO:0005623);; cellular component: organelle (GO:0043226);; cellular component: organelle part (GO:0044422);; cellular component: cell part (GO:0044464);; biological proces…
ENSG00000179344	HLA-DQB1	2.972476	182	2.982833	156	4.718489	305	1.646347	108	1.574904	97	1.9327	114	0.000145968	0.91498271	up	--	--	Biological Process: immune response (GO:0006955);; Cellular Component: integral component of membrane (GO:0016021);; Biological Process: antigen processing and presentation (GO:0019882);; Cellular Component: MHC class II protein complex (GO:0042613);;	K06752|4.9e-146|pps:100972994|K06752 MHC class II antigen | (RefSeq) HLA class II histocompatibility antigen, DQ beta 1 chain	Phagosome (ko04145);; Cell adhesion molecules (ko04514);; Antigen processing and presentation (ko04612);; Hematopoietic cell lineage (ko04640);; Th1 and Th2 cell differentiation (ko04658);; Th17 cell differentiation (ko04659);; Intestinal immune network for IgA production (ko04672);; Type I diabetes mellitus (ko04940);; Leishmaniasis (ko05140);; Toxoplasmosis (ko05145);; Staphylococcus aureus inf…	--	--	Class II histocompatibility antigen, beta domain	HLA class II histocompatibility antigen, DQ beta 1 chain OS=Homo sapiens OX=9606 GN=HLA-DQB1 PE=1 SV=2	T	Signal transduction mechanisms	HLA class II histocompatibility antigen, DQ beta 1 chain isoform 1 precursor [Homo sapiens]	biological process: immune system process (GO:0002376);; biological process: response to stimulus (GO:0050896);; cellular component: membrane (GO:0016020);; cellular component: membrane part (GO:0044425);; cellular component: cell (GO:0005623);; cellular component: macromolecular complex (GO:0032991);; cellular component: cell part (GO:0044464)
ENSG00000148926	ADM	5.929824	413	8.779673	548	10.856167	792	3.331909	257	4.467921	297	5.184189	358	5.59E-05	0.90200879	up	--	--	Molecular Function: hormone activity (GO:0005179);; Cellular Component: extracellular region (GO:0005576);;	K12333|4.9e-100|hsa:133|K12333 adrenomedullin | (RefSeq) ADM, AM, PAMP; adrenomedullin	Neuroactive ligand-receptor interaction (ko04080);; Vascular smooth muscle contraction (ko04270)	--	--	Calcitonin / CGRP / IAPP family	Pro-adrenomedullin OS=Homo sapiens OX=9606 GN=ADM PE=1 SV=1	T	Signal transduction mechanisms	pro-adrenomedullin precursor [Homo sapiens]	molecular function: binding (GO:0005488);; cellular component: extracellular region (GO:0005576)
ENSG00000129521	EGLN3	31.473698	3145	50.285199	4472	37.319925	4114	16.115134	1762	20.90509	2080	25.773568	2654	1.02E-05	0.884595378	up	--	--	Biological Process: response to hypoxia (GO:0001666);; Molecular Function: molecular_function (GO:0003674);; Molecular Function: catalytic activity (GO:0003824);; Cellular Component: cellular_component (GO:0005575);; Cellular Component: intracellular (GO:0005622);; Cellular Component: cell (GO:0005623);; Cellular Component: nucleus (GO:0005634);; Cellular Component: nucleoplasm (GO:0005654);; Cel…	K09592|6.4e-66|hai:109390367|K09592 hypoxia-inducible factor prolyl hydroxylase [EC:1.14.11.29] | (RefSeq) EGLN3; egl-9 family hypoxia inducible factor 3	HIF-1 signaling pathway (ko04066);; Pathways in cancer (ko05200);; Renal cell carcinoma (ko05211)	[T]	Signal transduction mechanisms	--	Prolyl hydroxylase EGLN3 OS=Homo sapiens OX=9606 GN=EGLN3 PE=1 SV=1	T	Signal transduction mechanisms	EGLN3 isoform 5 [Pan troglodytes]	biological process: response to stimulus (GO:0050896);; molecular function: catalytic activity (GO:0003824);; cellular component: cell (GO:0005623);; cellular component: cell part (GO:0044464);; cellular component: organelle (GO:0043226);; cellular component: organelle part (GO:0044422);; biological process: metabolic process (GO:0008152);; biological process: cellular process (GO:0009987);; biol…
ENSG00000126709	IFI6	3.402682	106	3.7182	105	3.003222	104	1.49923	52	1.808268	57	1.455649	49	0.000527088	0.88450989	up	--	--	Cellular Component: integral component of membrane (GO:0016021);;	--	--	--	--	Interferon-induced 6-16 family	Interferon alpha-inducible protein 6 OS=Homo sapiens OX=9606 GN=IFI6 PE=1 SV=2	T	Signal transduction mechanisms	interferon alpha-inducible protein 6 isoform a precursor [Homo sapiens]	cellular component: membrane (GO:0016020);; cellular component: membrane part (GO:0044425)
ENSG00000158373	HIST1H2BD	18.621269	514	16.461867	401	18.495915	549	9.070826	279	10.313792	270	10.102303	286	2.59E-07	0.881321614	up	--	--	Cellular Component: nucleosome (GO:0000786);; Molecular Function: DNA binding (GO:0003677);; Cellular Component: nucleoplasm (GO:0005654);; Cellular Component: cytosol (GO:0005829);; Molecular Function: protein heterodimerization activity (GO:0046982);;	K11252|5.8e-60|aju:106988062|K11252 histone H2B | (RefSeq) histone H2B type 1-M	Alcoholism (ko05034);; Viral carcinogenesis (ko05203);; Systemic lupus erythematosus (ko05322)	[B]	Chromatin structure and dynamics	Core histone H2A/H2B/H3/H4	Histone H2B type 1-D OS=Homo sapiens OX=9606 GN=H2BC5 PE=1 SV=2	B	Chromatin structure and dynamics	histone H2B type 1-M [Macaca mulatta]	cellular component: cell (GO:0005623);; cellular component: macromolecular complex (GO:0032991);; cellular component: organelle (GO:0043226);; cellular component: organelle part (GO:0044422);; cellular component: cell part (GO:0044464);; molecular function: binding (GO:0005488)
Homo_sapiens_newGene_2691	--	2.09001	45	1.905778	37	2.036963	49	0.396645	10	0.737129	16	0.835054	19	0.003097962	0.879401145	up	--	--	--	--	--	--	--	--	--	--	--	--	--
ENSG00000197747	S100A10	64.626297	2882	67.369379	2678	64.011105	3138	33.335793	1634	36.919454	1640	40.415978	1860	2.19E-10	0.870594537	up	--	--	Molecular Function: calcium ion binding (GO:0005509);; Cellular Component: integral component of membrane (GO:0016021);;	K17274|8.5e-51|bbub:102393139|K17274 protein S100-A10 | (RefSeq) S100A10; protein S100-A10	Salmonella infection (ko05132)	--	--	S-100/ICaBP type calcium binding domain	Protein S100-A10 OS=Homo sapiens OX=9606 GN=S100A10 PE=1 SV=2	S	Function unknown	S100 calcium binding protein A10 (annexin II ligand, calpactin I, light polypeptide (p11)), isoform CRA_b, partial [Homo sapiens]	molecular function: binding (GO:0005488);; cellular component: membrane (GO:0016020);; cellular component: membrane part (GO:0044425)
ENSG00000164096	C4orf3	20.333036	2081	26.237072	2322	21.766274	2348	12.110552	1322	13.343343	1354	13.527718	1335	4.73E-10	0.868999238	up	--	--	--	--	--	--	--	Family of unknown function (DUF5542)	Uncharacterized protein C4orf3 OS=Homo sapiens OX=9606 GN=C4orf3 PE=1 SV=2	S	Function unknown	uncharacterized protein C4orf3 isoform 1 [Homo sapiens]	--
ENSG00000100292	HMOX1	10.81213	731	5.168671	312	31.365499	2335	3.956261	294	2.944807	199	3.416434	239	0.003040591	0.86227105	up	[H]	Coenzyme transport and metabolism	Biological Process: angiogenesis (GO:0001525);; Biological Process: response to hypoxia (GO:0001666);; Molecular Function: heme oxygenase (decyclizing) activity (GO:0004392);; Molecular Function: phospholipase D activity (GO:0004630);; Cellular Component: nucleolus (GO:0005730);; Cellular Component: endoplasmic reticulum (GO:0005783);; Cellular Component: cytosol (GO:0005829);; Cellular Component…	K00510|5.6e-159|hsa:3162|K00510 heme oxygenase 1 [EC:1.14.14.18] | (RefSeq) HMOX1, HMOX1D, HO-1, HSP32, bK286B10; heme oxygenase 1	Porphyrin and chlorophyll metabolism (ko00860);; HIF-1 signaling pathway (ko04066);; Ferroptosis (ko04216);; Mineral absorption (ko04978);; Pathways in cancer (ko05200);; MicroRNAs in cancer (ko05206);; Hepatocellular carcinoma (ko05225);; Fluid shear stress and atherosclerosis (ko05418)	[P]	Inorganic ion transport and metabolism	Heme oxygenase	Heme oxygenase 1 OS=Homo sapiens OX=9606 GN=HMOX1 PE=1 SV=1	P	Inorganic ion transport and metabolism	heme oxygenase 1 [Homo sapiens]	biological process: developmental process (GO:0032502);; biological process: single-organism process (GO:0044699);; biological process: response to stimulus (GO:0050896);; biological process: metabolic process (GO:0008152);; molecular function: catalytic activity (GO:0003824);; cellular component: cell (GO:0005623);; cellular component: organelle (GO:0043226);; cellular component: organelle part …
ENSG00000141314	RHBDL3	0.747111	130	1.537352	172	0.935488	179	0.488713	93	0.598566	69	0.764292	92	0.000436344	0.858749682	up	--	--	Molecular Function: serine-type endopeptidase activity (GO:0004252);; Molecular Function: calcium ion binding (GO:0005509);; Cellular Component: integral component of membrane (GO:0016021);;	K02857|2.6e-231|hsa:162494|K02857 rhomboid-related protein 1/2/3 [EC:3.4.21.105] | (RefSeq) RHBDL3, RHBDL4, VRHO; rhomboid like 3	--	[T]	Signal transduction mechanisms	Rhomboid family	Rhomboid-related protein 3 OS=Homo sapiens OX=9606 GN=RHBDL3 PE=2 SV=1	T	Signal transduction mechanisms	rhomboid-related protein 3 isoform 1 [Homo sapiens]	biological process: metabolic process (GO:0008152);; molecular function: catalytic activity (GO:0003824);; molecular function: binding (GO:0005488);; cellular component: membrane (GO:0016020);; cellular component: membrane part (GO:0044425)
Homo_sapiens_newGene_2913	--	1.036594	92	1.285501	97	0.968803	85	0.135148	14	0.507507	45	0.509673	47	0.003957605	0.850968485	up	--	--	--	--	--	--	--	--	--	--	--	--	--
ENSG00000111405	ENDOU	1.160311	102	1.5438	121	1.097757	108	0.62184	60	0.641694	58	0.604272	55	0.000889833	0.845855851	up	--	--	Molecular Function: endoribonuclease activity (GO:0004521);;	K14648|9.5e-245|hsa:8909|K14648 poly(U)-specific endoribonuclease [EC:3.1.-.-] | (RefSeq) ENDOU, P11, PP11, PRSS26; endonuclease, poly(U) specific	--	[R]	General function prediction only	Endoribonuclease XendoU	Poly(U)-specific endoribonuclease OS=Homo sapiens OX=9606 GN=ENDOU PE=1 SV=2	S	Function unknown	poly(U)-specific endoribonuclease isoform 1 precursor [Homo sapiens]	biological process: metabolic process (GO:0008152);; biological process: cellular process (GO:0009987);; molecular function: catalytic activity (GO:0003824)
ENSG00000110921	MVK	90.957363	6799	101.917442	6110	106.114095	8037	52.664775	3697	57.770467	3902	71.015067	4810	7.08E-08	0.840366628	up	[I]	Lipid transport and metabolism	Molecular Function: mevalonate kinase activity (GO:0004496);; Molecular Function: ATP binding (GO:0005524);; Cellular Component: cytosol (GO:0005829);; Biological Process: cholesterol biosynthetic process (GO:0006695);; Biological Process: isopentenyl diphosphate biosynthetic process, mevalonate pathway (GO:0019287);; Cellular Component: intracellular membrane-bounded organelle (GO:0043231);;	K00869|4.7e-225|hsa:4598|K00869 mevalonate kinase [EC:2.7.1.36] | (RefSeq) MVK, LRBP, MK, MVLK, POROK3; mevalonate kinase	Terpenoid backbone biosynthesis (ko00900);; Peroxisome (ko04146)	[I]	Lipid transport and metabolism	GHMP kinases N terminal domain	Mevalonate kinase OS=Homo sapiens OX=9606 GN=MVK PE=1 SV=1	I	Lipid transport and metabolism	unnamed protein product [Homo sapiens]	biological process: metabolic process (GO:0008152);; biological process: cellular process (GO:0009987);; molecular function: catalytic activity (GO:0003824);; molecular function: binding (GO:0005488);; cellular component: cell (GO:0005623);; cellular component: cell part (GO:0044464);; biological process: single-organism process (GO:0044699);; cellular component: organelle (GO:0043226)
ENSG00000167653	PSCA	24.241475	896	22.177487	729	24.935193	1018	12.51019	511	12.689867	453	15.423396	590	9.42E-07	0.837558561	up	--	--	Cellular Component: plasma membrane (GO:0005886);;	K06846|3.6e-08|cjo:107310616|K06846 lymphocyte antigen 6 complex locus protein D/E/G6/H | (RefSeq) lymphocyte antigen 6E-like	--	--	--	u-PAR/Ly-6 domain	Prostate stem cell antigen OS=Homo sapiens OX=9606 GN=PSCA PE=1 SV=2	T	Signal transduction mechanisms	prostate stem cell antigen isoform X2 [Pan paniscus]	cellular component: cell (GO:0005623);; cellular component: membrane (GO:0016020);; cellular component: cell part (GO:0044464)
ENSG00000127324	TSPAN8	8.051348	364	9.588419	388	9.994801	500	4.503726	226	5.727843	259	5.215512	244	8.03E-06	0.834819944	up	--	--	Cellular Component: integral component of membrane (GO:0016021);;	K17349|2.1e-127|hsa:7103|K17349 tetraspanin-8 | (RefSeq) TSPAN8, CO-029, TM4SF3; tetraspanin 8	--	[R]	General function prediction only	Tetraspanin family	Tetraspanin-8 OS=Homo sapiens OX=9606 GN=TSPAN8 PE=1 SV=1	S	Function unknown	tetraspanin-8 [Homo sapiens]	cellular component: membrane (GO:0016020);; cellular component: membrane part (GO:0044425)
ENSG00000171346	KRT15	20.368578	3867	29.488724	4985	21.126704	4186	14.400396	2703	12.648054	2429	14.049444	2733	3.97E-07	0.834333915	up	--	--	Molecular Function: structural molecule activity (GO:0005198);; Cellular Component: intermediate filament (GO:0005882);;	K07604|2.2e-197|hsa:3866|K07604 type I keratin, acidic | (RefSeq) KRT15, CK15, K15, K1CO; keratin 15	Estrogen signaling pathway (ko04915);; Staphylococcus aureus infection (ko05150)	--	--	Intermediate filament protein	Keratin, type I cytoskeletal 15 OS=Homo sapiens OX=9606 GN=KRT15 PE=1 SV=3	Z	Cytoskeleton	keratin, type I cytoskeletal 15 [Homo sapiens]	molecular function: structural molecule activity (GO:0005198);; cellular component: cell (GO:0005623);; cellular component: organelle (GO:0043226);; cellular component: organelle part (GO:0044422);; cellular component: cell part (GO:0044464);; cellular component: supramolecular complex (GO:0099080)
ENSG00000103316	CRYM	22.447864	1179	20.904672	999	21.4781	1258	10.8987	629	11.547033	626	14.473144	789	7.20E-07	0.827691009	up	[E]	Amino acid transport and metabolism	Cellular Component: cytosol (GO:0005829);;	K18258|1.3e-172|hsa:1428|K18258 thiomorpholine-carboxylate dehydrogenase [EC:1.5.1.25] | (RefSeq) CRYM, DFNA40, THBP; crystallin mu	--	[E]	Amino acid transport and metabolism	Ornithine cyclodeaminase/mu-crystallin family	Ketimine reductase mu-crystallin OS=Homo sapiens OX=9606 GN=CRYM PE=1 SV=1	E	Amino acid transport and metabolism	ketimine reductase mu-crystallin [Homo sapiens]	cellular component: cell (GO:0005623);; cellular component: cell part (GO:0044464)
ENSG00000143320	CRABP2	152.446184	5579	183.646515	6010	155.765367	6284	79.459422	3214	87.503041	3217	113.281702	4310	1.27E-06	0.817548949	up	--	--	Molecular Function: retinoic acid binding (GO:0001972);; Cellular Component: cytosol (GO:0005829);; Biological Process: retinoic acid catabolic process (GO:0034653);;	K17289|1.1e-72|hsa:1382|K17289 cellular retinoic acid-binding protein 2 | (RefSeq) CRABP2, CRABP-II, RBP6; cellular retinoic acid binding protein 2	--	[I]	Lipid transport and metabolism	Lipocalin / cytosolic fatty-acid binding protein family	Cellular retinoic acid-binding protein 2 OS=Homo sapiens OX=9606 GN=CRABP2 PE=1 SV=2	K	Transcription	cellular retinoic acid-binding protein 2 [Homo sapiens]	molecular function: binding (GO:0005488);; cellular component: cell (GO:0005623);; cellular component: cell part (GO:0044464);; biological process: metabolic process (GO:0008152);; biological process: cellular process (GO:0009987);; biological process: single-organism process (GO:0044699);; biological process: biological regulation (GO:0065007)
ENSG00000100100	PIK3IP1	19.802181	1786	20.734703	1670	19.626168	1956	9.614467	955	11.753742	1065	13.358877	1246	4.89E-07	0.815015968	up	--	--	Biological Process: negative regulation of phosphatidylinositol 3-kinase signaling (GO:0014067);; Cellular Component: integral component of membrane (GO:0016021);; Biological Process: negative regulation of phosphatidylinositol 3-kinase activity (GO:0043553);;	K01343|2.8e-08|biu:109553480|K01343 tissue plasminogen activator [EC:3.4.21.68] | (RefSeq) PLAT; tissue-type plasminogen activator	Apelin signaling pathway (ko04371);; Complement and coagulation cascades (ko04610);; Transcriptional misregulation in cancer (ko05202);; Prostate cancer (ko05215);; Fluid shear stress and atherosclerosis (ko05418)	--	--	Kringle domain	Phosphoinositide-3-kinase-interacting protein 1 OS=Homo sapiens OX=9606 GN=PIK3IP1 PE=1 SV=2	T	Signal transduction mechanisms	phosphoinositide-3-kinase-interacting protein 1 isoform 1 precursor [Homo sapiens]	biological process: biological regulation (GO:0065007);; cellular component: membrane (GO:0016020);; cellular component: membrane part (GO:0044425)
ENSG00000104892	KLC3	6.042025	390	7.150216	420	6.087014	443	3.398487	249	3.798334	251	3.897535	255	4.32E-06	0.812333755	up	--	--	Molecular Function: microtubule motor activity (GO:0003777);; Cellular Component: cytoplasm (GO:0005737);; Cellular Component: kinesin complex (GO:0005871);; Cellular Component: microtubule (GO:0005874);; Molecular Function: microtubule binding (GO:0008017);; Biological Process: axo-dendritic transport (GO:0008088);; Molecular Function: kinesin binding (GO:0019894);; Cellular Component: motile ci…	K10407|1.2e-122|hsa:147700|K10407 kinesin light chain | (RefSeq) KLC3, KLC2, KLC2L, KLCt, KNS2B; kinesin light chain 3	Alzheimer disease (ko05010);; Parkinson disease (ko05012);; Amyotrophic lateral sclerosis (ko05014);; Huntington disease (ko05016);; Prion disease (ko05020);; Salmonella infection (ko05132)	[Z]	Cytoskeleton	Tetratricopeptide repeat	Kinesin light chain 3 OS=Homo sapiens OX=9606 GN=KLC3 PE=1 SV=2	Z	Cytoskeleton	kinesin light chain 3 isoform X2 [Homo sapiens]	molecular function: catalytic activity (GO:0003824);; cellular component: cell (GO:0005623);; cellular component: cell part (GO:0044464);; cellular component: macromolecular complex (GO:0032991);; cellular component: organelle (GO:0043226);; cellular component: organelle part (GO:0044422);; cellular component: supramolecular complex (GO:0099080);; molecular function: binding (GO:0005488);; biolog…
ENSG00000143847	PPFIA4	0.242493	51	0.513973	110	0.334549	88	0.174224	46	0.166644	40	0.149078	30	0.005126357	0.806877397	up	--	--	Cellular Component: presynaptic active zone (GO:0048786);;	K19931|1.7e-20|xla:108705383|K19931 protein lin-7 | (RefSeq) protein lin-7 homolog B-like	--	[R]	General function prediction only	SAM domain (Sterile alpha motif)	Liprin-alpha-4 OS=Homo sapiens OX=9606 GN=PPFIA4 PE=2 SV=3	S	Function unknown	liprin-alpha-4 isoform X5 [Pan paniscus]	cellular component: cell (GO:0005623);; cellular component: synapse part (GO:0044456);; cellular component: cell part (GO:0044464);; cellular component: synapse (GO:0045202)
Homo_sapiens_newGene_7131	--	3.095771	551	2.190739	348	3.412107	544	1.427603	279	1.158112	206	1.83527	337	0.000260452	0.804525703	up	--	--	--	--	--	--	--	--	--	--	--	FKSG60 [Homo sapiens]	--
ENSG00000137880	GCHFR	35.908117	1034	50.088816	1288	42.417094	1347	22.733809	723	23.842916	685	27.64994	824	2.88E-06	0.803151889	up	--	--	Cellular Component: nucleoplasm (GO:0005654);; Biological Process: negative regulation of biosynthetic process (GO:0009890);; Molecular Function: hydrolase activity (GO:0016787);;	--	--	--	--	GTP cyclohydrolase I feedback regulatory protein (GFRP)	GTP cyclohydrolase 1 feedback regulatory protein OS=Homo sapiens OX=9606 GN=GCHFR PE=1 SV=3	S	Function unknown	GTP cyclohydrolase 1 feedback regulatory protein [Homo sapiens]	cellular component: cell (GO:0005623);; cellular component: organelle (GO:0043226);; cellular component: organelle part (GO:0044422);; cellular component: cell part (GO:0044464);; biological process: biological regulation (GO:0065007);; molecular function: catalytic activity (GO:0003824)
ENSG00000160752	FDPS	361.965705	16809	413.432563	16963	412.105013	20450	206.623677	10371	225.608919	10346	271.156714	12663	4.05E-08	0.802603	up	[H]	Coenzyme transport and metabolism	Biological Process: isoprenoid biosynthetic process (GO:0008299);; Molecular Function: transferase activity (GO:0016740);;	K00787|2.3e-246|hsa:2224|K00787 farnesyl diphosphate synthase [EC:2.5.1.1 2.5.1.10] | (RefSeq) FDPS, FPPS, FPS, POROK9; farnesyl diphosphate synthase	Terpenoid backbone biosynthesis (ko00900);; Influenza A (ko05164);; Human T-cell leukemia virus 1 infection (ko05166)	[H]	Coenzyme transport and metabolism	Polyprenyl synthetase	Farnesyl pyrophosphate synthase OS=Homo sapiens OX=9606 GN=FDPS PE=1 SV=4	H	Coenzyme transport and metabolism	farnesyl pyrophosphate synthase isoform a [Homo sapiens]	biological process: metabolic process (GO:0008152);; biological process: cellular process (GO:0009987);; biological process: single-organism process (GO:0044699);; molecular function: catalytic activity (GO:0003824)
ENSG00000171345	KRT19	2743.050831	140792	3282.002042	150270	2892.223135	163548	1559.834099	87721	1647.414793	84170	2052.251765	108663	1.86E-07	0.797680436	up	--	--	Biological Process: desmosome assembly (GO:0002159);; Molecular Function: structural molecule activity (GO:0005198);; Cellular Component: intermediate filament (GO:0005882);; Cellular Component: adherens junction (GO:0005912);; Biological Process: cell adhesion (GO:0007155);; Cellular Component: catenin complex (GO:0016342);; Molecular Function: alpha-catenin binding (GO:0045294);; Molecular Func…	K07604|3.8e-214|hsa:3880|K07604 type I keratin, acidic | (RefSeq) KRT19, CK19, K19, K1CS; keratin 19	Estrogen signaling pathway (ko04915);; Staphylococcus aureus infection (ko05150)	--	--	Intermediate filament protein	Keratin, type I cytoskeletal 19 OS=Homo sapiens OX=9606 GN=KRT19 PE=1 SV=4	Z	Cytoskeleton	keratin, type I cytoskeletal 19 [Homo sapiens]	biological process: cellular process (GO:0009987);; biological process: single-organism process (GO:0044699);; biological process: cellular component organization or biogenesis (GO:0071840);; molecular function: structural molecule activity (GO:0005198);; cellular component: cell (GO:0005623);; cellular component: organelle (GO:0043226);; cellular component: organelle part (GO:0044422);; cellular…
ENSG00000109099	PMP22	1.394546	96	0.92069	56	1.509482	112	0.629345	43	0.46927	33	0.711613	51	0.00452649	0.796880251	up	--	--	Cellular Component: bicellular tight junction (GO:0005923);; Biological Process: negative regulation of cell proliferation (GO:0008285);; Biological Process: negative regulation of neuron projection development (GO:0010977);; Cellular Component: integral component of membrane (GO:0016021);; Biological Process: myelination (GO:0042552);; Cellular Component: compact myelin (GO:0043218);;	K19289|3.8e-80|hsa:5376|K19289 peripheral myelin protein 22 | (RefSeq) PMP22, CIDP, CMT1A, CMT1E, DSS, GAS-3, GAS3, HMSNIA, HNPP, Sp110; peripheral myelin protein 22	--	--	--	PMP-22/EMP/MP20/Claudin family	Peripheral myelin protein 22 OS=Homo sapiens OX=9606 GN=PMP22 PE=1 SV=1	T	Signal transduction mechanisms	peripheral myelin protein 22 isoform 1 [Homo sapiens]	cellular component: cell junction (GO:0030054);; biological process: biological regulation (GO:0065007);; biological process: cellular process (GO:0009987);; biological process: multicellular organismal process (GO:0032501);; biological process: developmental process (GO:0032502);; biological process: single-organism process (GO:0044699);; cellular component: membrane (GO:0016020);; cellular comp…
ENSG00000175946	KLHL38	0.734626	55	0.717499	48	0.780892	64	0.304029	25	0.412911	31	0.283641	22	0.00584256	0.792102664	up	[S]	Function unknown	Cellular Component: ubiquitin ligase complex (GO:0000151);; Cellular Component: nuclear chromatin (GO:0000790);; Molecular Function: actin binding (GO:0003779);; Molecular Function: protein binding (GO:0005515);; Cellular Component: cellular_component (GO:0005575);; Cellular Component: intracellular (GO:0005622);; Cellular Component: cell (GO:0005623);; Cellular Component: nucleoplasm (GO:0005654…	K13959|0.0e+00|hsa:340359|K13959 kelch-like protein 38 | (RefSeq) KLHL38, C8ORFK36; kelch like family member 38	--	[TR]	Signal transduction mechanisms;; General function prediction only	Kelch motif	Kelch-like protein 38 OS=Homo sapiens OX=9606 GN=KLHL38 PE=1 SV=3	T	Signal transduction mechanisms	kelch-like protein 38 [Homo sapiens]	cellular component: cell (GO:0005623);; cellular component: macromolecular complex (GO:0032991);; cellular component: cell part (GO:0044464);; cellular component: membrane-enclosed lumen (GO:0031974);; cellular component: organelle (GO:0043226);; cellular component: organelle part (GO:0044422);; molecular function: binding (GO:0005488);; biological process: cellular process (GO:0009987);; biologi…
ENSG00000119938	PPP1R3C	5.423124	508	6.157012	514	6.32651	653	3.561379	367	3.429315	320	3.573093	346	1.04E-06	0.791946981	up	--	--	Biological Process: glycogen metabolic process (GO:0005977);;	K07189|3.4e-189|hsa:5507|K07189 protein phosphatase 1 regulatory subunit 3A/B/C/D/E | (RefSeq) PPP1R3C, PPP1R5, PTG; protein phosphatase 1 regulatory subunit 3C	Insulin signaling pathway (ko04910);; Insulin resistance (ko04931)	[OT]	Posttranslational modification, protein turnover, chaperones;; Signal transduction mechanisms	Carbohydrate/starch-binding module (family 21)	Protein phosphatase 1 regulatory subunit 3C OS=Homo sapiens OX=9606 GN=PPP1R3C PE=1 SV=2	--	--	protein phosphatase 1 regulatory subunit 3C [Homo sapiens]	biological process: metabolic process (GO:0008152);; biological process: cellular process (GO:0009987);; biological process: single-organism process (GO:0044699)
ENSG00000176171	BNIP3	28.482827	3046	38.171391	3633	33.591082	3944	16.298978	1914	21.11312	2250	21.510007	2373	1.24E-06	0.791911673	up	--	--	Cellular Component: mitochondrial envelope (GO:0005740);; Cellular Component: integral component of membrane (GO:0016021);; Biological Process: positive regulation of apoptotic process (GO:0043065);;	K15464|1.8e-117|hsa:664|K15464 BCL2/adenovirus E1B 19 kDa protein-interacting protein 3 | (RefSeq) BNIP3, NIP3; BCL2 interacting protein 3	FoxO signaling pathway (ko04068);; Mitophagy - animal (ko04137);; Autophagy - animal (ko04140);; Shigellosis (ko05131);; Legionellosis (ko05134)	--	--	BNIP3	BCL2/adenovirus E1B 19 kDa protein-interacting protein 3 OS=Homo sapiens OX=9606 GN=BNIP3 PE=1 SV=3	U	Intracellular trafficking, secretion, and vesicular transport	BNIP3 isoform 3, partial [Pan troglodytes]	cellular component: cell (GO:0005623);; cellular component: organelle (GO:0043226);; cellular component: organelle part (GO:0044422);; cellular component: cell part (GO:0044464);; cellular component: membrane (GO:0016020);; cellular component: membrane part (GO:0044425);; biological process: biological regulation (GO:0065007)
ENSG00000177181	RIMKLA	0.668096	221	0.864135	255	0.608033	222	0.400119	146	0.488461	161	0.28561	98	0.000628995	0.791513202	up	[HJ]	Coenzyme transport and metabolism;; Translation, ribosomal structure and biogenesis	Molecular Function: ATP binding (GO:0005524);;	K18311|1.5e-226|ggo:101137769|K18311 N-acetylaspartylglutamate/N-acetylaspartylglutamylglutamate synthase [EC:6.3.2.41 6.3.2.42] | (RefSeq) RIMKLA; N-acetylaspartylglutamate synthase A	Alanine, aspartate and glutamate metabolism (ko00250)	--	--	RimK-like ATP-grasp domain	N-acetylaspartylglutamate synthase A OS=Homo sapiens OX=9606 GN=RIMKLA PE=2 SV=2	F	Nucleotide transport and metabolism	N-acetylaspartylglutamate synthase A [Homo sapiens]	molecular function: binding (GO:0005488)
ENSG00000179593	ALOX15B	105.282606	10291	140.111406	11755	112.441279	11682	56.744149	6103	66.805515	6511	81.219925	8224	3.60E-06	0.782829006	up	--	--	Molecular Function: iron ion binding (GO:0005506);; Molecular Function: oxidoreductase activity, acting on single donors with incorporation of molecular oxygen, incorporation of two atoms of oxygen (GO:0016702);;	K08022|0.0e+00|hsa:247|K08022 arachidonate 15-lipoxygenase (second type) / 8-lipoxygenase (S-type) [EC:1.13.11.33 1.13.11.-] | (RefSeq) ALOX15B, 15-LOX-2; arachidonate 15-lipoxygenase type B	Arachidonic acid metabolism (ko00590);; Serotonergic synapse (ko04726)	--	--	Lipoxygenase	Polyunsaturated fatty acid lipoxygenase ALOX15B OS=Homo sapiens OX=9606 GN=ALOX15B PE=1 SV=3	E	Amino acid transport and metabolism	polyunsaturated fatty acid lipoxygenase ALOX15B isoform d [Homo sapiens]	molecular function: binding (GO:0005488);; biological process: metabolic process (GO:0008152);; biological process: single-organism process (GO:0044699);; molecular function: catalytic activity (GO:0003824)
ENSG00000079459	FDFT1	330.736076	24973	417.716487	26101	389.261014	29863	201.524474	15820	219.246674	15955	269.690698	19002	5.04E-08	0.781927825	up	[I]	Lipid transport and metabolism	Molecular Function: farnesyl-diphosphate farnesyltransferase activity (GO:0004310);; Cellular Component: endoplasmic reticulum (GO:0005783);; Biological Process: lipid biosynthetic process (GO:0008610);; Cellular Component: integral component of membrane (GO:0016021);; Molecular Function: squalene synthase activity (GO:0051996);;	K00801|6.9e-243|hsa:2222|K00801 farnesyl-diphosphate farnesyltransferase [EC:2.5.1.21] | (RefSeq) FDFT1, DGPT, ERG9, SQS, SQSD, SS; farnesyl-diphosphate farnesyltransferase 1	Steroid biosynthesis (ko00100)	[I]	Lipid transport and metabolism	Squalene/phytoene synthase	Squalene synthase OS=Homo sapiens OX=9606 GN=FDFT1 PE=1 SV=1	I	Lipid transport and metabolism	squalene synthase [Pongo abelii]	molecular function: catalytic activity (GO:0003824);; cellular component: cell (GO:0005623);; cellular component: organelle (GO:0043226);; cellular component: cell part (GO:0044464);; biological process: metabolic process (GO:0008152);; biological process: single-organism process (GO:0044699);; cellular component: membrane (GO:0016020);; cellular component: membrane part (GO:0044425)
Homo_sapiens_newGene_10037	--	11.600472	262	13.459009	271	13.603593	338	5.134711	128	7.106781	160	8.947679	209	0.000710574	0.781714916	up	--	--	--	--	--	--	--	--	--	--	--	--	--
Homo_sapiens_newGene_4437	--	198.910805	12508	325.541542	18380	320.358108	22330	125.665104	8674	134.841248	8478	216.782677	13896	0.000316919	0.780251036	up	--	--	--	--	--	--	--	--	--	--	--	--	--
Homo_sapiens_newGene_10325	--	1.994962	370	2.262588	374	1.680166	343	0.845755	172	1.235396	228	1.26918	243	0.000303797	0.77987554	up	--	--	--	K12581|1.0e-15|nle:100584332|K12581 CCR4-NOT transcription complex subunit 7/8 | (RefSeq) CNOT8; CCR4-NOT transcription complex subunit 8 isoform X1	RNA degradation (ko03018)	--	--	--	Putative uncharacterized protein encoded by LINC00596 OS=Homo sapiens OX=9606 GN=LINC00596 PE=5 SV=1	S	Function unknown	hypothetical protein EGM_08570, partial [Macaca fascicularis]	--
ENSG00000161677	JOSD2	15.390061	552	18.558229	585	19.145812	728	11.460623	436	8.792806	307	11.443811	404	1.56E-05	0.778930839	up	--	--	Molecular Function: thiol-dependent ubiquitin-specific protease activity (GO:0004843);; Biological Process: protein deubiquitination (GO:0016579);;	K15235|1.6e-101|hsa:126119|K15235 josephin [EC:3.4.19.12] | (RefSeq) JOSD2, SBBI54; Josephin domain containing 2	--	[R]	General function prediction only	Josephin	Josephin-2 OS=Homo sapiens OX=9606 GN=JOSD2 PE=1 SV=1	S	Function unknown	JOSD2 protein, partial [Homo sapiens]	biological process: metabolic process (GO:0008152);; molecular function: catalytic activity (GO:0003824);; biological process: cellular process (GO:0009987)
ENSG00000215845	TSTD1	105.129909	2232	118.307881	2249	121.608293	2849	56.242095	1303	68.633894	1452	80.523953	1760	3.92E-06	0.777157803	up	--	--	Molecular Function: thiosulfate-thiol sulfurtransferase activity (GO:0050337);; Biological Process: sulfide oxidation, using sulfide:quinone oxidoreductase (GO:0070221);;	K01013|2.0e-53|pon:100939343|K01013 thiosulfate:glutathione sulfurtransferase [EC:2.8.1.-] | (RefSeq) TSTD1; thiosulfate:glutathione sulfurtransferase isoform X1	--	[P]	Inorganic ion transport and metabolism	Rhodanese-like domain	Thiosulfate:glutathione sulfurtransferase OS=Homo sapiens OX=9606 GN=TSTD1 PE=1 SV=3	P	Inorganic ion transport and metabolism	LOC100134860 protein, partial [Homo sapiens]	molecular function: catalytic activity (GO:0003824);; biological process: metabolic process (GO:0008152);; biological process: cellular process (GO:0009987);; biological process: single-organism process (GO:0044699)
ENSG00000198892	SHISA4	2.895097	145	3.05406	136	2.875784	158	1.586952	87	1.574737	79	1.729566	89	0.000725273	0.77663102	up	--	--	--	K10135|1.2e-11|sanh:107704442|K10135 scotin | (RefSeq) protein shisa-5-like	p53 signaling pathway (ko04115)	--	--	Wnt and FGF inhibitory regulator	Protein shisa-4 OS=Homo sapiens OX=9606 GN=SHISA4 PE=1 SV=3	S	Function unknown	protein shisa-4 precursor [Homo sapiens]	--
ENSG00000160285	LSS	102.698708	17791	123.096919	17638	115.249785	20857	66.928761	12050	65.009979	10578	78.538085	13252	1.80E-08	0.76709855	up	[I]	Lipid transport and metabolism	Molecular Function: lanosterol synthase activity (GO:0000250);; Cellular Component: lipid droplet (GO:0005811);; Biological Process: triterpenoid biosynthetic process (GO:0016104);; Molecular Function: beta-amyrin synthase activity (GO:0042300);;	K01852|0.0e+00|hsa:4047|K01852 lanosterol synthase [EC:5.4.99.7] | (RefSeq) LSS, APMR4, CTRCT44, HYPT14, OSC; lanosterol synthase	Steroid biosynthesis (ko00100)	[I]	Lipid transport and metabolism	Squalene-hopene cyclase C-terminal domain	Lanosterol synthase OS=Homo sapiens OX=9606 GN=LSS PE=1 SV=1	I	Lipid transport and metabolism	lanosterol synthase isoform 1 [Homo sapiens]	molecular function: catalytic activity (GO:0003824);; cellular component: cell (GO:0005623);; cellular component: organelle (GO:0043226);; cellular component: cell part (GO:0044464);; biological process: metabolic process (GO:0008152);; biological process: cellular process (GO:0009987);; biological process: single-organism process (GO:0044699)
ENSG00000120129	DUSP1	24.194178	1813	29.494287	1970	27.428864	2262	16.177794	1332	13.720628	1024	18.568901	1437	3.53E-06	0.766788606	up	--	--	Molecular Function: protein tyrosine phosphatase activity (GO:0004725);; Molecular Function: MAP kinase tyrosine/serine/threonine phosphatase activity (GO:0017017);;	K21278|7.0e-207|ggo:101145560|K21278 dual specificity protein phosphatase 1 [EC:3.1.3.16 3.1.3.48] | (RefSeq) DUSP1; dual specificity protein phosphatase 1	MAPK signaling pathway (ko04010);; Serotonergic synapse (ko04726);; Parkinson disease (ko05012);; Fluid shear stress and atherosclerosis (ko05418)	[V]	Defense mechanisms	Dual specificity phosphatase, catalytic domain	Dual specificity protein phosphatase 1 OS=Homo sapiens OX=9606 GN=DUSP1 PE=1 SV=3	V	Defense mechanisms	dual specificity protein phosphatase 1 [Homo sapiens]	biological process: metabolic process (GO:0008152);; biological process: cellular process (GO:0009987);; molecular function: catalytic activity (GO:0003824);; biological process: biological regulation (GO:0065007)
ENSG00000166710	B2M	285.712945	10102	286.605252	9093	233.358034	11008	157.097609	6273	169.958485	5947	141.381887	7066	6.73E-09	0.765921126	up	--	--	Biological Process: antigen processing and presentation of peptide antigen via MHC class I (GO:0002474);; Cellular Component: extracellular region (GO:0005576);; Biological Process: immune response (GO:0006955);; Cellular Component: MHC class I protein complex (GO:0042612);;	K08055|1.0e-61|ggo:101132159|K08055 beta-2-microglobulin | (RefSeq) B2M; beta-2-microglobulin isoform X2	Antigen processing and presentation (ko04612);; Human cytomegalovirus infection (ko05163);; Human T-cell leukemia virus 1 infection (ko05166);; Herpes simplex virus 1 infection (ko05168);; Epstein-Barr virus infection (ko05169);; Human immunodeficiency virus 1 infection (ko05170)	--	--	Immunoglobulin C1-set domain	Beta-2-microglobulin OS=Homo sapiens OX=9606 GN=B2M PE=1 SV=1	W	Extracellular structures	beta-2-microglobulin precursor [Pan troglodytes]	biological process: immune system process (GO:0002376);; cellular component: extracellular region (GO:0005576);; biological process: response to stimulus (GO:0050896);; cellular component: cell (GO:0005623);; cellular component: membrane (GO:0016020);; cellular component: macromolecular complex (GO:0032991);; cellular component: membrane part (GO:0044425);; cellular component: cell part (GO:00444…
ENSG00000173141	MRPL57	27.489258	2291	27.889761	2072	28.68446	2632	14.425071	1321	16.017139	1330	19.994812	1721	2.98E-06	0.763877162	up	--	--	Molecular Function: structural constituent of ribosome (GO:0003735);; Cellular Component: mitochondrial ribosome (GO:0005761);; Biological Process: translation (GO:0006412);;	--	--	--	--	Mitochondrial ribosome protein 63	Ribosomal protein 63, mitochondrial OS=Homo sapiens OX=9606 GN=MRPL57 PE=1 SV=1	J	Translation, ribosomal structure and biogenesis	ribosomal protein 63, mitochondrial [Homo sapiens]	molecular function: structural molecule activity (GO:0005198);; cellular component: cell (GO:0005623);; cellular component: macromolecular complex (GO:0032991);; cellular component: organelle (GO:0043226);; cellular component: organelle part (GO:0044422);; cellular component: cell part (GO:0044464);; biological process: metabolic process (GO:0008152);; biological process: cellular process (GO:000…
ENSG00000124762	CDKN1A	13.918482	1119	11.094125	801	12.649022	1147	6.852276	612	7.972554	635	8.111644	675	2.52E-06	0.762470665	up	--	--	Cellular Component: cyclin-dependent protein kinase holoenzyme complex (GO:0000307);; Molecular Function: cyclin-dependent protein serine/threonine kinase inhibitor activity (GO:0004861);; Cellular Component: nucleoplasm (GO:0005654);; Cellular Component: cytosol (GO:0005829);; Biological Process: protein import into nucleus (GO:0006606);; Biological Process: DNA damage response, signal transduct…	K06625|4.0e-93|ggo:101126640|K06625 cyclin-dependent kinase inhibitor 1A | (RefSeq) CDKN1A; cyclin-dependent kinase inhibitor 1 isoform X1	Endocrine resistance (ko01522);; Platinum drug resistance (ko01524);; ErbB signaling pathway (ko04012);; HIF-1 signaling pathway (ko04066);; FoxO signaling pathway (ko04068);; Cell cycle (ko04110);; p53 signaling pathway (ko04115);; PI3K-Akt signaling pathway (ko04151);; Cellular senescence (ko04218);; JAK-STAT signaling pathway (ko04630);; Oxytocin signaling pathway (ko04921);; Parathyroid hormo…	[T]	Signal transduction mechanisms	Cyclin-dependent kinase inhibitor	Cyclin-dependent kinase inhibitor 1 OS=Homo sapiens OX=9606 GN=CDKN1A PE=1 SV=3	K	Transcription	cyclin-dependent kinase, partial [Homo sapiens]	cellular component: cell (GO:0005623);; cellular component: macromolecular complex (GO:0032991);; cellular component: cell part (GO:0044464);; biological process: biological regulation (GO:0065007);; molecular function: molecular function regulator (GO:0098772);; cellular component: organelle (GO:0043226);; cellular component: organelle part (GO:0044422);; biological process: single-organism proc…
ENSG00000263429	TMEM238L	1.369102	78	1.067489	55	1.179616	74	0.26057	17	0.716691	41	0.593856	35	0.00928818	0.761915305	up	--	--	Cellular Component: integral component of membrane (GO:0016021);;	--	--	--	--	TMEM238 protein family	Putative transmembrane protein LOC100289255 OS=Homo sapiens OX=9606 PE=5 SV=2	S	Function unknown	hCG1800530, isoform CRA_b [Homo sapiens]	cellular component: membrane (GO:0016020);; cellular component: membrane part (GO:0044425)
Homo_sapiens_newGene_7705	--	1.474763	50	1.456596	44	2.151899	79	0.471066	18	0.91558	31	0.813914	28	0.009538571	0.760292944	up	--	--	--	--	--	--	--	--	--	--	--	--	--
ENSG00000169174	PCSK9	2.198696	297	2.262064	273	1.569	234	1.101371	164	1.410366	190	0.944316	132	0.000607694	0.758551351	up	[S]	Function unknown	Cellular Component: lytic vacuole (GO:0000323);; Biological Process: urogenital system development (GO:0001655);; Biological Process: kidney development (GO:0001822);; Biological Process: liver development (GO:0001889);; Biological Process: regulation of receptor recycling (GO:0001919);; Biological Process: negative regulation of receptor recycling (GO:0001920);; Biological Process: regulation of…	K13050|0.0e+00|hsa:255738|K13050 proprotein convertase subtilisin/kexin type 9 [EC:3.4.21.-] | (RefSeq) PCSK9, FH3, FHCL3, HCHOLA3, LDLCQ1, NARC-1, NARC1, PC9; proprotein convertase subtilisin/kexin type 9	Cholesterol metabolism (ko04979)	--	--	Proprotein convertase subtilisin-like/kexin type 9 C-terminal domain	Proprotein convertase subtilisin/kexin type 9 OS=Homo sapiens OX=9606 GN=PCSK9 PE=1 SV=3	O	Posttranslational modification, protein turnover, chaperones	proprotein convertase subtilisin/kexin type 9 preproprotein [Homo sapiens]	cellular component: cell (GO:0005623);; cellular component: organelle (GO:0043226);; cellular component: cell part (GO:0044464);; biological process: multicellular organismal process (GO:0032501);; biological process: developmental process (GO:0032502);; biological process: single-organism process (GO:0044699);; biological process: biological regulation (GO:0065007);; molecular function: catalyti…
Homo_sapiens_newGene_11010	--	3.1526	313	4.679101	440	3.037667	469	3.16263	342	1.373098	105	2.187777	227	0.004495757	0.756708689	up	--	--	--	--	--	--	--	--	--	--	--	--	--
ENSG00000105137	SYDE1	2.092838	255	3.340126	368	2.26064	306	1.122093	155	1.011614	113	1.922801	247	0.003636079	0.756653651	up	--	--	Biological Process: signal transduction (GO:0007165);;	K20655|2.3e-219|nle:100589671|K20655 Rho GTPase-activating protein SYDE | (RefSeq) SYDE1; rho GTPase-activating protein SYDE1	--	[T]	Signal transduction mechanisms	RhoGAP domain	Rho GTPase-activating protein SYDE1 OS=Homo sapiens OX=9606 GN=SYDE1 PE=1 SV=1	T	Signal transduction mechanisms	synapse defective 1, Rho GTPase, homolog 1 (C. elegans), isoform CRA_a [Homo sapiens]	biological process: cellular process (GO:0009987);; biological process: biological regulation (GO:0065007)
ENSG00000125347	IRF1	2.857048	364	2.000771	236	2.402458	326	1.244405	177	1.02532	136	1.657854	227	0.001165172	0.756052371	up	--	--	Molecular Function: transcription factor activity, sequence-specific DNA binding (GO:0003700);; Cellular Component: nucleus (GO:0005634);; Cellular Component: cytoplasm (GO:0005737);; Biological Process: apoptotic process (GO:0006915);; Biological Process: negative regulation of cell proliferation (GO:0008285);; Biological Process: positive regulation of type I interferon production (GO:0032481);…	K09444|7.7e-189|hsa:3659|K09444 interferon regulatory factor 1 | (RefSeq) IRF1, IRF-1, MAR; interferon regulatory factor 1	C-type lectin receptor signaling pathway (ko04625);; TNF signaling pathway (ko04668);; Prolactin signaling pathway (ko04917);; Pertussis (ko05133);; Human papillomavirus infection (ko05165)	--	--	Interferon regulatory factor transcription factor	Interferon regulatory factor 1 OS=Homo sapiens OX=9606 GN=IRF1 PE=1 SV=2	K	Transcription	interferon regulatory factor 1 isoform 1 [Homo sapiens]	biological process: biological regulation (GO:0065007);; molecular function: nucleic acid binding transcription factor activity (GO:0001071);; cellular component: cell (GO:0005623);; cellular component: organelle (GO:0043226);; cellular component: cell part (GO:0044464);; biological process: cellular process (GO:0009987);; biological process: single-organism process (GO:0044699);; biological proc…
ENSG00000117318	ID3	2.624149	122	6.372704	264	5.312936	272	2.856509	146	1.819961	85	2.643438	127	0.005103982	0.753275077	up	--	--	Cellular Component: nucleus (GO:0005634);; Cellular Component: cytoplasm (GO:0005737);; Biological Process: negative regulation of transcription, DNA-templated (GO:0045892);; Molecular Function: protein dimerization activity (GO:0046983);;	K17694|4.1e-63|hsa:3399|K17694 DNA-binding protein inhibitor ID3 | (RefSeq) ID3, HEIR-1, bHLHb25; inhibitor of DNA binding 3, HLH protein	TGF-beta signaling pathway (ko04350);; Signaling pathways regulating pluripotency of stem cells (ko04550)	--	--	Helix-loop-helix DNA-binding domain	DNA-binding protein inhibitor ID-3 OS=Homo sapiens OX=9606 GN=ID3 PE=1 SV=2	K	Transcription	DNA-binding protein inhibitor ID-3 [Homo sapiens]	cellular component: cell (GO:0005623);; cellular component: organelle (GO:0043226);; cellular component: cell part (GO:0044464);; biological process: biological regulation (GO:0065007);; molecular function: binding (GO:0005488)
ENSG00000180596	HIST1H2BC	2.212157	54	1.918203	40	1.871869	50	0.906602	25	0.766228	18	0.90872	24	0.010004151	0.752704164	up	--	--	Cellular Component: nucleosome (GO:0000786);; Biological Process: innate immune response in mucosa (GO:0002227);; Molecular Function: DNA binding (GO:0003677);; Cellular Component: extracellular space (GO:0005615);; Cellular Component: nucleoplasm (GO:0005654);; Cellular Component: cytosol (GO:0005829);; Biological Process: antibacterial humoral response (GO:0019731);; Molecular Function: protein…	K11252|9.9e-60|aju:106988066|K11252 histone H2B | (RefSeq) histone H2B type 1	Alcoholism (ko05034);; Viral carcinogenesis (ko05203);; Systemic lupus erythematosus (ko05322)	[B]	Chromatin structure and dynamics	Core histone H2A/H2B/H3/H4	Histone H2B type 1-C/E/F/G/I OS=Homo sapiens OX=9606 GN=H2BC4 PE=1 SV=4	B	Chromatin structure and dynamics	histone H2B type 1 [Macaca mulatta]	cellular component: cell (GO:0005623);; cellular component: macromolecular complex (GO:0032991);; cellular component: organelle (GO:0043226);; cellular component: organelle part (GO:0044422);; cellular component: cell part (GO:0044464);; biological process: immune system process (GO:0002376);; biological process: response to stimulus (GO:0050896);; molecular function: binding (GO:0005488);; cellu…
ENSG00000100906	NFKBIA	104.324458	6010	90.016785	4607	100.673625	6386	49.988695	3172	52.406684	3016	73.666953	4390	2.42E-05	0.750983153	up	[T]	Signal transduction mechanisms	Cellular Component: cytosol (GO:0005829);; Cellular Component: plasma membrane (GO:0005886);;	K04734|6.6e-161|hsa:4792|K04734 NF-kappa-B inhibitor alpha | (RefSeq) NFKBIA, EDAID2, IKBA, MAD-3, NFKBI; NFKB inhibitor alpha	cAMP signaling pathway (ko04024);; Chemokine signaling pathway (ko04062);; NF-kappa B signaling pathway (ko04064);; Apoptosis (ko04210);; Osteoclast differentiation (ko04380);; Toll-like receptor signaling pathway (ko04620);; NOD-like receptor signaling pathway (ko04621);; RIG-I-like receptor signaling pathway (ko04622);; Cytosolic DNA-sensing pathway (ko04623);; C-type lectin receptor signaling …	[R]	General function prediction only	Ankyrin repeats (3 copies)	NF-kappa-B inhibitor alpha OS=Homo sapiens OX=9606 GN=NFKBIA PE=1 SV=1	K	Transcription	NF-kappa-B inhibitor alpha [Homo sapiens]	cellular component: cell (GO:0005623);; cellular component: cell part (GO:0044464);; cellular component: membrane (GO:0016020)
ENSG00000163435	ELF3	84.455775	9477	78.426277	8455	88.557621	10743	44.718075	5723	44.940162	4957	61.275189	7371	7.77E-06	0.75065518	up	--	--	Molecular Function: RNA polymerase II core promoter proximal region sequence-specific DNA binding (GO:0000978);; Molecular Function: transcriptional activator activity, RNA polymerase II transcription regulatory region sequence-specific binding (GO:0001228);; Biological Process: blastocyst development (GO:0001824);; Cellular Component: nucleoplasm (GO:0005654);; Cellular Component: Golgi apparatu…	K09429|5.1e-213|ggo:101127911|K09429 E74-like factor 3 | (RefSeq) ELF3; ETS-related transcription factor Elf-3	--	[K]	Transcription	Ets-domain	ETS-related transcription factor Elf-3 OS=Homo sapiens OX=9606 GN=ELF3 PE=1 SV=1	K	Transcription	ETS-related transcription factor Elf-3 [Homo sapiens]	molecular function: binding (GO:0005488);; biological process: biological regulation (GO:0065007);; molecular function: nucleic acid binding transcription factor activity (GO:0001071);; biological process: developmental process (GO:0032502);; biological process: single-organism process (GO:0044699);; cellular component: cell (GO:0005623);; cellular component: organelle (GO:0043226);; cellular com…
ENSG00000069399	BCL3	37.180762	2776	33.956893	2245	38.464896	3145	19.955008	1642	20.723353	1529	25.946888	1992	2.53E-06	0.750497505	up	[T]	Signal transduction mechanisms	Biological Process: protein import into nucleus, translocation (GO:0000060);; Biological Process: response to protozoan (GO:0001562);; Biological Process: cell activation (GO:0001775);; Biological Process: regulation of cytokine production (GO:0001817);; Biological Process: negative regulation of cytokine production (GO:0001818);; Biological Process: positive regulation of cytokine production (GO…	K09258|1.3e-226|hsa:602|K09258 B-cell CLL/lymphoma protein 3 | (RefSeq) BCL3, BCL4, D19S37; BCL3 transcription coactivator	C-type lectin receptor signaling pathway (ko04625);; TNF signaling pathway (ko04668)	[R]	General function prediction only	Ankyrin repeats (3 copies)	B-cell lymphoma 3 protein OS=Homo sapiens OX=9606 GN=BCL3 PE=1 SV=2	K	Transcription	B-cell lymphoma 3 protein [Homo sapiens]	biological process: localization (GO:0051179);; biological process: response to stimulus (GO:0050896);; biological process: multi-organism process (GO:0051704);; biological process: cellular process (GO:0009987);; biological process: single-organism process (GO:0044699);; biological process: biological regulation (GO:0065007);; biological process: immune system process (GO:0002376);; biological p…
ENSG00000169884	WNT10B	1.371709	116	1.052878	79	1.073257	100	0.554501	52	0.744259	63	0.546278	48	0.004403515	0.748827103	up	--	--	Molecular Function: receptor binding (GO:0005102);; Cellular Component: extracellular region (GO:0005576);; Biological Process: multicellular organism development (GO:0007275);; Biological Process: Wnt signaling pathway (GO:0016055);;	K01357|1.2e-228|ggo:101142818|K01357 wingless-type MMTV integration site family, member 10 | (RefSeq) WNT10B; protein Wnt-10b	mTOR signaling pathway (ko04150);; Wnt signaling pathway (ko04310);; Hippo signaling pathway (ko04390);; Signaling pathways regulating pluripotency of stem cells (ko04550);; Melanogenesis (ko04916);; Cushing syndrome (ko04934);; Alzheimer disease (ko05010);; Human papillomavirus infection (ko05165);; Pathways in cancer (ko05200);; Proteoglycans in cancer (ko05205);; Basal cell carcinoma (ko05217)…	[T]	Signal transduction mechanisms	wnt family	Protein Wnt-10b OS=Homo sapiens OX=9606 GN=WNT10B PE=1 SV=2	T	Signal transduction mechanisms	protein Wnt-10b precursor [Homo sapiens]	molecular function: binding (GO:0005488);; cellular component: extracellular region (GO:0005576);; biological process: multicellular organismal process (GO:0032501);; biological process: developmental process (GO:0032502);; biological process: single-organism process (GO:0044699);; biological process: cellular process (GO:0009987);; biological process: signaling (GO:0023052);; biological process:…
Homo_sapiens_newGene_4349	--	0.997096	85	0.800192	61	0.877681	83	0.396416	37	0.375183	32	0.547301	49	0.007417373	0.747203302	up	--	--	--	--	--	--	--	--	--	--	--	--	--
ENSG00000149809	TM7SF2	301.489501	16806	314.625708	15362	292.893161	17777	174.934142	10335	163.058229	9243	207.979415	12459	7.70E-07	0.746085088	up	[O]	Posttranslational modification, protein turnover, chaperones	Cellular Component: endoplasmic reticulum (GO:0005783);; Cellular Component: endoplasmic reticulum membrane (GO:0005789);; Biological Process: cholesterol biosynthetic process (GO:0006695);; Cellular Component: integral component of membrane (GO:0016021);; Cellular Component: intracellular membrane-bounded organelle (GO:0043231);; Molecular Function: delta14-sterol reductase activity (GO:0050613)…	K00222|2.6e-242|hsa:7108|K00222 Delta14-sterol reductase [EC:1.3.1.70] | (RefSeq) TM7SF2, ANG1, C14SR, DHCR14A, NET47; transmembrane 7 superfamily member 2	Steroid biosynthesis (ko00100)	[IT]	Lipid transport and metabolism;; Signal transduction mechanisms	Ergosterol biosynthesis ERG4/ERG24 family	Delta(14)-sterol reductase TM7SF2 OS=Homo sapiens OX=9606 GN=TM7SF2 PE=1 SV=3	I	Lipid transport and metabolism	delta(14)-sterol reductase TM7SF2 isoform 1 [Homo sapiens]	cellular component: cell (GO:0005623);; cellular component: organelle (GO:0043226);; cellular component: cell part (GO:0044464);; cellular component: membrane (GO:0016020);; cellular component: organelle part (GO:0044422);; cellular component: membrane part (GO:0044425);; biological process: metabolic process (GO:0008152);; biological process: single-organism process (GO:0044699);; molecular func…
ENSG00000170421	KRT8	2436.73612	168373	2864.038164	174760	2595.057682	198362	1490.362654	112443	1457.969498	100653	1898.811049	135540	1.19E-06	0.740473965	up	--	--	--	--	--	--	--	--	--	--	--	KRT8 isoform 4 [Pan troglodytes]	--
Homo_sapiens_newGene_8485	--	0.152985	37	0.341233	118	0.160495	69	0.080091	32	0.112544	44	0.035919	14	0.013171281	0.738259194	up	--	--	--	--	--	--	--	--	--	--	--	--	--
ENSG00000213937	CLDN9	6.862555	522	6.458855	438	5.345374	448	3.423477	287	3.619326	275	4.171456	328	8.67E-05	0.73695627	up	--	--	Biological Process: epithelial cell morphogenesis (GO:0003382);; Molecular Function: structural molecule activity (GO:0005198);; Cellular Component: cytoplasm (GO:0005737);; Cellular Component: bicellular tight junction (GO:0005923);; Biological Process: establishment of endothelial blood-brain barrier (GO:0014045);; Cellular Component: integral component of membrane (GO:0016021);; Cellular Compo…	K06087|2.8e-102|hsa:9080|K06087 claudin | (RefSeq) CLDN9; claudin 9	Cell adhesion molecules (ko04514);; Tight junction (ko04530);; Leukocyte transendothelial migration (ko04670);; Pathogenic Escherichia coli infection (ko05130);; Hepatitis C (ko05160)	--	--	PMP-22/EMP/MP20/Claudin family	Claudin-9 OS=Homo sapiens OX=9606 GN=CLDN9 PE=1 SV=1	S	Function unknown	claudin-9 [Homo sapiens]	biological process: cellular process (GO:0009987);; biological process: developmental process (GO:0032502);; biological process: single-organism process (GO:0044699);; biological process: cellular component organization or biogenesis (GO:0071840);; molecular function: structural molecule activity (GO:0005198);; cellular component: cell (GO:0005623);; cellular component: cell part (GO:0044464);; c…
ENSG00000111674	ENO2	5.001301	448	8.363685	679	6.578091	659	3.168034	321	3.933832	356	4.490082	421	0.000560413	0.736515522	up	[G]	Carbohydrate transport and metabolism	Cellular Component: phosphopyruvate hydratase complex (GO:0000015);; Molecular Function: magnesium ion binding (GO:0000287);; Cellular Component: photoreceptor inner segment (GO:0001917);; Molecular Function: phosphopyruvate hydratase activity (GO:0004634);; Cellular Component: cytosol (GO:0005829);; Cellular Component: plasma membrane (GO:0005886);; Biological Process: glycolytic process (GO:000…	K01689|1.0e-249|hsa:2026|K01689 enolase [EC:4.2.1.11] | (RefSeq) ENO2, HEL-S-279, NSE; enolase 2	Glycolysis / Gluconeogenesis (ko00010);; Carbon metabolism (ko01200);; Biosynthesis of amino acids (ko01230);; RNA degradation (ko03018);; HIF-1 signaling pathway (ko04066)	[G]	Carbohydrate transport and metabolism	Enolase, C-terminal TIM barrel domain	Gamma-enolase OS=Homo sapiens OX=9606 GN=ENO2 PE=1 SV=3	G	Carbohydrate transport and metabolism	gamma-enolase [Homo sapiens]	cellular component: cell (GO:0005623);; cellular component: macromolecular complex (GO:0032991);; cellular component: cell part (GO:0044464);; molecular function: binding (GO:0005488);; molecular function: catalytic activity (GO:0003824);; cellular component: membrane (GO:0016020);; biological process: metabolic process (GO:0008152);; biological process: cellular process (GO:0009987);; biological…
ENSG00000005448	WDR54	1.975538	76	3.727275	142	2.968143	140	1.539649	72	1.109385	47	1.645415	73	0.007701536	0.735946139	up	--	--	--	--	--	--	--	--	WD repeat-containing protein 54 OS=Homo sapiens OX=9606 GN=WDR54 PE=1 SV=1	S	Function unknown	WD repeat-containing protein 54 isoform b [Homo sapiens]	--
ENSG00000077150	NFKB2	12.42273	1476	10.438567	1114	10.510064	1411	6.861013	901	5.962897	715	7.785211	953	8.80E-06	0.733905872	up	[T]	Signal transduction mechanisms	Molecular Function: DNA binding (GO:0003677);; Molecular Function: transcription factor activity, sequence-specific DNA binding (GO:0003700);; Cellular Component: cytoplasm (GO:0005737);; Biological Process: signal transduction (GO:0007165);; Cellular Component: host cell nucleus (GO:0042025);;	K04469|0.0e+00|pps:100984729|K04469 nuclear factor of kappa light polypeptide gene enhancer in B-cells 2 | (RefSeq) NFKB2; nuclear factor kappa B subunit 2	MAPK signaling pathway (ko04010);; NF-kappa B signaling pathway (ko04064);; Osteoclast differentiation (ko04380);; C-type lectin receptor signaling pathway (ko04625);; Legionellosis (ko05134);; Human T-cell leukemia virus 1 infection (ko05166);; Epstein-Barr virus infection (ko05169);; Pathways in cancer (ko05200);; Viral carcinogenesis (ko05203);; Breast cancer (ko05224)	--	--	Rel homology DNA-binding domain	Nuclear factor NF-kappa-B p100 subunit OS=Homo sapiens OX=9606 GN=NFKB2 PE=1 SV=4	K	Transcription	nuclear factor NF-kappa-B p100 subunit isoform b [Homo sapiens]	molecular function: binding (GO:0005488);; biological process: biological regulation (GO:0065007);; molecular function: nucleic acid binding transcription factor activity (GO:0001071);; cellular component: cell (GO:0005623);; cellular component: cell part (GO:0044464);; biological process: cellular process (GO:0009987);; cellular component: other organism (GO:0044215);; cellular component: other …
ENSG00000117394	SLC2A1	32.616959	4412	42.625088	5174	37.227985	5581	21.831855	3262	21.425484	2898	26.089159	3669	2.25E-06	0.733780869	up	[G]	Carbohydrate transport and metabolism	Molecular Function: glucose transmembrane transporter activity (GO:0005355);; Cellular Component: integral component of membrane (GO:0016021);;	K07299|2.4e-274|ggo:101145851|K07299 MFS transporter, SP family, solute carrier family 2 (facilitated glucose transporter), member 1 | (RefSeq) SLC2A1; solute carrier family 2, facilitated glucose transporter member 1	HIF-1 signaling pathway (ko04066);; Insulin secretion (ko04911);; Thyroid hormone signaling pathway (ko04919);; Adipocytokine signaling pathway (ko04920);; Glucagon signaling pathway (ko04922);; Insulin resistance (ko04931);; Bile secretion (ko04976);; Human T-cell leukemia virus 1 infection (ko05166);; Pathways in cancer (ko05200);; Renal cell carcinoma (ko05211);; Central carbon metabolism in c…	[G]	Carbohydrate transport and metabolism	Sugar (and other) transporter	Solute carrier family 2, facilitated glucose transporter member 1 OS=Homo sapiens OX=9606 GN=SLC2A1 PE=1 SV=2	P	Inorganic ion transport and metabolism	solute carrier family 2, facilitated glucose transporter member 1 [Homo sapiens]	biological process: single-organism process (GO:0044699);; biological process: localization (GO:0051179);; molecular function: transporter activity (GO:0005215);; cellular component: membrane (GO:0016020);; cellular component: membrane part (GO:0044425)
ENSG00000215218	UBE2QL1	5.427711	870	5.203761	743	5.012655	884	3.060253	539	3.472076	554	3.228633	535	3.49E-07	0.733646446	up	--	--	Molecular Function: molecular_function (GO:0003674);; Molecular Function: catalytic activity (GO:0003824);; Molecular Function: ubiquitin-protein transferase activity (GO:0004842);; Cellular Component: cellular_component (GO:0005575);; Cellular Component: intracellular (GO:0005622);; Cellular Component: cell (GO:0005623);; Cellular Component: nucleus (GO:0005634);; Cellular Component: plasma memb…	K10582|8.4e-88|aju:113603673|K10582 ubiquitin-conjugating enzyme E2 Q [EC:2.3.2.23] | (RefSeq) UBE2QL1; ubiquitin-conjugating enzyme E2Q-like protein 1 isoform X1	Ubiquitin mediated proteolysis (ko04120)	[O]	Posttranslational modification, protein turnover, chaperones	Ubiquitin-conjugating enzyme	Ubiquitin-conjugating enzyme E2Q-like protein 1 OS=Homo sapiens OX=9606 GN=UBE2QL1 PE=1 SV=2	O	Posttranslational modification, protein turnover, chaperones	ubiquitin-conjugating enzyme E2Q-like protein 1, partial [Hylobates moloch]	molecular function: catalytic activity (GO:0003824);; cellular component: cell (GO:0005623);; cellular component: cell part (GO:0044464);; cellular component: organelle (GO:0043226);; cellular component: membrane (GO:0016020);; biological process: metabolic process (GO:0008152);; biological process: cellular process (GO:0009987)
ENSG00000171236	LRG1	0.466081	53	0.762812	77	0.784312	98	0.249892	31	0.287445	33	0.412977	49	0.010862927	0.731626308	up	--	--	Biological Process: cell activation (GO:0001775);; Biological Process: immune effector process (GO:0002252);; Biological Process: cell activation involved in immune response (GO:0002263);; Biological Process: myeloid leukocyte activation (GO:0002274);; Biological Process: myeloid cell activation involved in immune response (GO:0002275);; Biological Process: neutrophil activation involved in immun…	--	--	[R]	General function prediction only	Leucine rich repeat	Leucine-rich alpha-2-glycoprotein OS=Homo sapiens OX=9606 GN=LRG1 PE=1 SV=2	T	Signal transduction mechanisms	Leucine-rich alpha-2-glycoprotein 1 [Homo sapiens]	biological process: cellular process (GO:0009987);; biological process: single-organism process (GO:0044699);; biological process: immune system process (GO:0002376);; biological process: response to stimulus (GO:0050896);; molecular function: binding (GO:0005488);; cellular component: extracellular region (GO:0005576);; cellular component: extracellular region part (GO:0044421);; cellular compon…
ENSG00000167799	NUDT8	25.804842	708	31.509185	779	28.500968	863	15.174807	458	16.46404	451	20.636813	587	6.78E-05	0.727199016	up	[V]	Defense mechanisms	Molecular Function: hydrolase activity (GO:0016787);;	K18665|2.1e-71|ggo:101143790|K18665 nudix motif 8 [EC:3.6.1.-] | (RefSeq) NUDT8; nucleoside diphosphate-linked moiety X motif 8	--	--	--	NUDIX domain	Nucleoside diphosphate-linked moiety X motif 8 OS=Homo sapiens OX=9606 GN=NUDT8 PE=1 SV=2	L	Replication, recombination and repair	nucleoside diphosphate-linked moiety X motif 8 isoform 2 [Homo sapiens]	molecular function: catalytic activity (GO:0003824)
ENSG00000141526	SLC16A3	28.903284	2330	36.528146	3050	31.381287	2949	17.331996	1662	19.797795	1657	24.060366	2042	3.41E-05	0.726755478	up	[P]	Inorganic ion transport and metabolism	Cellular Component: plasma membrane (GO:0005886);; Molecular Function: lactate transmembrane transporter activity (GO:0015129);; Cellular Component: nuclear membrane (GO:0031965);; Biological Process: plasma membrane lactate transport (GO:0035879);; Cellular Component: parallel fiber to Purkinje cell synapse (GO:0098688);; Cellular Component: integral component of postsynaptic density membrane (G…	K08180|6.7e-263|hsa:9123|K08180 MFS transporter, MCT family, solute carrier family 16 (monocarboxylic acid transporters), member 3 | (RefSeq) SLC16A3, MCT_3, MCT_4, MCT-3, MCT-4, MCT3, MCT4; solute carrier family 16 member 3	Central carbon metabolism in cancer (ko05230)	[G]	Carbohydrate transport and metabolism	Major Facilitator Superfamily	Monocarboxylate transporter 4 OS=Homo sapiens OX=9606 GN=SLC16A3 PE=1 SV=1	P	Inorganic ion transport and metabolism	monocarboxylate transporter 4 [Homo sapiens]	cellular component: cell (GO:0005623);; cellular component: membrane (GO:0016020);; cellular component: cell part (GO:0044464);; biological process: single-organism process (GO:0044699);; biological process: localization (GO:0051179);; molecular function: transporter activity (GO:0005215);; cellular component: organelle (GO:0043226);; cellular component: organelle part (GO:0044422);; cellular com…
ENSG00000172893	DHCR7	261.18238	24907	253.507934	21642	250.738895	26471	154.169356	16127	149.362972	14172	181.350336	17751	7.82E-08	0.723602693	up	[O]	Posttranslational modification, protein turnover, chaperones	Biological Process: blood vessel development (GO:0001568);; Cellular Component: endoplasmic reticulum (GO:0005783);; Cellular Component: cytosol (GO:0005829);; Biological Process: cholesterol biosynthetic process (GO:0006695);; Biological Process: post-embryonic development (GO:0009791);; Cellular Component: integral component of membrane (GO:0016021);; Biological Process: cell differentiation (G…	K00213|8.9e-295|hsa:1717|K00213 7-dehydrocholesterol reductase [EC:1.3.1.21] | (RefSeq) DHCR7, SLOS; 7-dehydrocholesterol reductase	Steroid biosynthesis (ko00100)	[IT]	Lipid transport and metabolism;; Signal transduction mechanisms	Ergosterol biosynthesis ERG4/ERG24 family	7-dehydrocholesterol reductase OS=Homo sapiens OX=9606 GN=DHCR7 PE=1 SV=1	I	Lipid transport and metabolism	7-dehydrocholesterol reductase [Homo sapiens]	biological process: developmental process (GO:0032502);; biological process: single-organism process (GO:0044699);; cellular component: cell (GO:0005623);; cellular component: organelle (GO:0043226);; cellular component: cell part (GO:0044464);; biological process: metabolic process (GO:0008152);; biological process: multicellular organismal process (GO:0032501);; cellular component: membrane (GO…
ENSG00000186132	C2orf76	8.115618	228	11.540582	282	10.822946	326	5.727227	192	6.693892	193	4.466686	138	0.000658899	0.723166365	up	--	--	--	--	--	[S]	Function unknown	Uncharacterized conserved protein (DUF2340)	UPF0538 protein C2orf76 OS=Homo sapiens OX=9606 GN=C2orf76 PE=1 SV=3	S	Function unknown	UPF0538 protein C2orf76 isoform 1 [Homo sapiens]	--
Homo_sapiens_newGene_11543	--	3.810271	69	5.590054	90	7.958125	158	2.134356	43	3.626219	65	2.96024	56	0.010172689	0.72239646	up	[J]	Translation, ribosomal structure and biogenesis	Biological Process: ribosomal small subunit assembly (GO:0000028);; Molecular Function: structural constituent of ribosome (GO:0003735);; Molecular Function: laminin receptor activity (GO:0005055);; Cellular Component: nucleus (GO:0005634);; Cellular Component: plasma membrane (GO:0005886);; Biological Process: translation (GO:0006412);; Cellular Component: cytosolic small ribosomal subunit (GO:0…	K02998|7.8e-66|aju:106966658|K02998 small subunit ribosomal protein SAe | (RefSeq) RPSA; 40S ribosomal protein SA	Ribosome (ko03010)	[J]	Translation, ribosomal structure and biogenesis	Ribosomal protein S2	40S ribosomal protein SA OS=Homo sapiens OX=9606 GN=RPSA PE=1 SV=4	J	Translation, ribosomal structure and biogenesis	40S ribosomal protein SA-like [Macaca nemestrina]	biological process: cellular process (GO:0009987);; biological process: cellular component organization or biogenesis (GO:0071840);; molecular function: structural molecule activity (GO:0005198);; molecular function: molecular transducer activity (GO:0060089);; cellular component: cell (GO:0005623);; cellular component: organelle (GO:0043226);; cellular component: cell part (GO:0044464);; cellula…
ENSG00000149925	ALDOA	1348.035308	75121	1679.571834	83150	1398.296871	87421	791.835557	48436	833.573644	46361	1105.457767	64227	1.72E-05	0.720893495	up	[G]	Carbohydrate transport and metabolism	Molecular Function: fructose-bisphosphate aldolase activity (GO:0004332);; Cellular Component: cytosol (GO:0005829);; Biological Process: glycolytic process (GO:0006096);;	K01623|1.0e-238|mcf:101925639|K01623 fructose-bisphosphate aldolase, class I [EC:4.1.2.13] | (RefSeq) ALDOA; aldolase, fructose-bisphosphate A	Glycolysis / Gluconeogenesis (ko00010);; Pentose phosphate pathway (ko00030);; Fructose and mannose metabolism (ko00051);; Carbon metabolism (ko01200);; Biosynthesis of amino acids (ko01230);; HIF-1 signaling pathway (ko04066)	[G]	Carbohydrate transport and metabolism	Fructose-bisphosphate aldolase class-I	Fructose-bisphosphate aldolase A OS=Homo sapiens OX=9606 GN=ALDOA PE=1 SV=2	F	Nucleotide transport and metabolism	fructose-bisphosphate aldolase A isoform 2 [Homo sapiens]	molecular function: catalytic activity (GO:0003824);; cellular component: cell (GO:0005623);; cellular component: cell part (GO:0044464);; biological process: metabolic process (GO:0008152);; biological process: cellular process (GO:0009987);; biological process: single-organism process (GO:0044699)
ENSG00000122971	ACADS	3.075937	223	4.564833	295	3.854276	307	2.05575	164	1.589389	115	2.836201	212	0.003145756	0.718931378	up	[I]	Lipid transport and metabolism	Molecular Function: acyl-CoA dehydrogenase activity (GO:0003995);; Cellular Component: nucleoplasm (GO:0005654);; Cellular Component: mitochondrion (GO:0005739);; Cellular Component: centrosome (GO:0005813);; Molecular Function: flavin adenine dinucleotide binding (GO:0050660);;	K00248|3.3e-229|hsa:35|K00248 butyryl-CoA dehydrogenase [EC:1.3.8.1] | (RefSeq) ACADS, ACAD3, SCAD; acyl-CoA dehydrogenase short chain	Fatty acid degradation (ko00071);; Valine, leucine and isoleucine degradation (ko00280);; beta-Alanine metabolism (ko00410);; Propanoate metabolism (ko00640);; Butanoate metabolism (ko00650);; Carbon metabolism (ko01200);; Fatty acid metabolism (ko01212)	[I]	Lipid transport and metabolism	Acyl-CoA dehydrogenase, C-terminal domain	Short-chain specific acyl-CoA dehydrogenase, mitochondrial OS=Homo sapiens OX=9606 GN=ACADS PE=1 SV=1	C	Energy production and conversion	short-chain specific acyl-CoA dehydrogenase, mitochondrial isoform 1 precursor [Homo sapiens]	biological process: metabolic process (GO:0008152);; biological process: single-organism process (GO:0044699);; molecular function: catalytic activity (GO:0003824);; cellular component: cell (GO:0005623);; cellular component: organelle (GO:0043226);; cellular component: organelle part (GO:0044422);; cellular component: cell part (GO:0044464);; molecular function: binding (GO:0005488)
ENSG00000103490	PYCARD	25.263573	855	29.311794	908	25.585324	981	15.372027	571	15.342882	517	18.907455	687	3.69E-05	0.717872286	up	--	--	Molecular Function: cysteine-type endopeptidase activity (GO:0004197);;	K12799|1.9e-42|ggo:101128578|K12799 apoptosis-associated speck-like protein containing a CARD | (RefSeq) PYCARD; apoptosis-associated speck-like protein containing a CARD	Necroptosis (ko04217);; NOD-like receptor signaling pathway (ko04621);; Cytosolic DNA-sensing pathway (ko04623);; C-type lectin receptor signaling pathway (ko04625);; Salmonella infection (ko05132);; Pertussis (ko05133);; Legionellosis (ko05134);; Yersinia infection (ko05135);; Influenza A (ko05164)	--	--	PAAD/DAPIN/Pyrin domain	Apoptosis-associated speck-like protein containing a CARD OS=Homo sapiens OX=9606 GN=PYCARD PE=1 SV=2	K	Transcription	PYCARD isoform 1 [Pan troglodytes]	biological process: metabolic process (GO:0008152);; molecular function: catalytic activity (GO:0003824)
ENSG00000203812	HIST2H2AA3	14.60596	298	17.89921	325	17.045736	383	9.65239	217	8.845577	180	11.358137	239	0.000332985	0.71778315	up	--	--	Cellular Component: nucleosome (GO:0000786);; Molecular Function: DNA binding (GO:0003677);; Cellular Component: nucleus (GO:0005634);; Molecular Function: protein heterodimerization activity (GO:0046982);;	K11251|2.4e-64|aml:100466877|K11251 histone H2A | (RefSeq) histone H2A type 2-A	Necroptosis (ko04217);; Alcoholism (ko05034);; Systemic lupus erythematosus (ko05322)	[B]	Chromatin structure and dynamics	C-terminus of histone H2A	Histone H2A type 2-A OS=Homo sapiens OX=9606 GN=H2AC18 PE=1 SV=3	B	Chromatin structure and dynamics	PREDICTED: LOW QUALITY PROTEIN: uncharacterized protein LOC105821768 [Propithecus coquereli]	cellular component: cell (GO:0005623);; cellular component: macromolecular complex (GO:0032991);; cellular component: organelle (GO:0043226);; cellular component: organelle part (GO:0044422);; cellular component: cell part (GO:0044464);; molecular function: binding (GO:0005488)
ENSG00000242114	MTFP1	26.438412	1136	38.464907	1311	32.171674	1494	16.698539	803	19.265175	795	21.119042	959	1.78E-05	0.717727586	up	--	--	Cellular Component: mitochondrion (GO:0005739);; Biological Process: apoptotic process (GO:0006915);; Biological Process: mitochondrion organization (GO:0007005);; Biological Process: response to muscle activity (GO:0014850);;	K17981|1.3e-88|ggo:101142035|K17981 mitochondrial fission process protein 1 | (RefSeq) MTFP1; mitochondrial fission process protein 1 isoform X1	--	[S]	Function unknown	Mitochondrial 18 KDa protein (MTP18)	Mitochondrial fission process protein 1 OS=Homo sapiens OX=9606 GN=MTFP1 PE=1 SV=1	C	Energy production and conversion	mitochondrial fission process protein 1 isoform a [Homo sapiens]	cellular component: cell (GO:0005623);; cellular component: organelle (GO:0043226);; cellular component: cell part (GO:0044464);; biological process: cellular process (GO:0009987);; biological process: single-organism process (GO:0044699);; biological process: cellular component organization or biogenesis (GO:0071840);; biological process: response to stimulus (GO:0050896)
ENSG00000119703	ZC2HC1C	0.641043	73	0.876974	64	0.469816	55	0.488729	38	0.679318	38	0.150581	25	0.011766241	0.717384638	up	--	--	--	--	--	--	--	--	Zinc finger C2HC domain-containing protein 1C OS=Homo sapiens OX=9606 GN=ZC2HC1C PE=1 SV=3	S	Function unknown	zinc finger C2HC domain-containing protein 1C isoform a [Homo sapiens]	--
Homo_sapiens_newGene_169	--	1.551204	227	1.916636	250	2.604477	419	0.254802	41	1.500936	219	1.037587	157	0.014436857	0.716918303	up	--	--	--	--	--	--	--	--	--	--	--	--	--
Homo_sapiens_newGene_8481	--	0.539673	101	0.62282	127	0.85297	146	0.179226	47	0.445988	84	0.441334	77	0.008227605	0.711861595	up	--	--	--	--	--	--	--	--	--	--	--	--	--
ENSG00000284292	AC004922.1	0.577907	46	0.615915	44	1.693507	169	0.488489	39	0.423219	35	0.055719	4	0.014891859	0.707579982	up	--	--	Cellular Component: Arp2/3 protein complex (GO:0005885);; Biological Process: Arp2/3 complex-mediated actin nucleation (GO:0034314);; Molecular Function: actin filament binding (GO:0051015);;	K05757|1.1e-192|aju:106981214|K05757 actin related protein 2/3 complex, subunit 1A/1B | (RefSeq) ARPC1A; actin-related protein 2/3 complex subunit 1A	Endocytosis (ko04144);; Fc gamma R-mediated phagocytosis (ko04666);; Regulation of actin cytoskeleton (ko04810);; Bacterial invasion of epithelial cells (ko05100);; Salmonella infection (ko05132)	[Z]	Cytoskeleton	WD domain, G-beta repeat	Actin-related protein 2/3 complex subunit 1A OS=Homo sapiens OX=9606 GN=ARPC1A PE=1 SV=2	Z	Cytoskeleton	T0170890 isoform 1 [Pongo abelii]	cellular component: cell (GO:0005623);; cellular component: macromolecular complex (GO:0032991);; cellular component: organelle (GO:0043226);; cellular component: organelle part (GO:0044422);; cellular component: cell part (GO:0044464);; biological process: cellular process (GO:0009987);; biological process: single-organism process (GO:0044699);; biological process: biological regulation (GO:0065…
ENSG00000102032	RENBP	0.855934	43	0.802477	37	0.72495	42	0.273843	16	0.158548	9	0.462565	25	0.017821575	0.70568611	up	[G]	Carbohydrate transport and metabolism	Molecular Function: catalytic activity (GO:0003824);;	K01787|6.6e-257|hsa:5973|K01787 N-acylglucosamine 2-epimerase [EC:5.1.3.8] | (RefSeq) RENBP, RBP, RNBP; renin binding protein	Amino sugar and nucleotide sugar metabolism (ko00520)	--	--	N-acylglucosamine 2-epimerase (GlcNAc 2-epimerase)	N-acylglucosamine 2-epimerase OS=Homo sapiens OX=9606 GN=RENBP PE=1 SV=2	K	Transcription	N-acylglucosamine 2-epimerase [Homo sapiens]	molecular function: catalytic activity (GO:0003824)
ENSG00000120437	ACAT2	64.259987	7581	72.597244	7635	71.115807	9237	41.620865	5396	44.158127	5190	47.471924	5785	2.49E-08	0.705621974	up	[I]	Lipid transport and metabolism	Molecular Function: transferase activity, transferring acyl groups other than amino-acyl groups (GO:0016747);;	K00626|2.4e-224|hsa:39|K00626 acetyl-CoA C-acetyltransferase [EC:2.3.1.9] | (RefSeq) ACAT2; acetyl-CoA acetyltransferase 2	Fatty acid degradation (ko00071);; Synthesis and degradation of ketone bodies (ko00072);; Valine, leucine and isoleucine degradation (ko00280);; Lysine degradation (ko00310);; Tryptophan metabolism (ko00380);; Pyruvate metabolism (ko00620);; Glyoxylate and dicarboxylate metabolism (ko00630);; Propanoate metabolism (ko00640);; Butanoate metabolism (ko00650);; Terpenoid backbone biosynthesis (ko009…	[I]	Lipid transport and metabolism	Thiolase, N-terminal domain	Acetyl-CoA acetyltransferase, cytosolic OS=Homo sapiens OX=9606 GN=ACAT2 PE=1 SV=2	I	Lipid transport and metabolism	acetyl-CoA acetyltransferase, cytosolic isoform 1 [Homo sapiens]	molecular function: catalytic activity (GO:0003824)
ENSG00000174276	ZNHIT2	73.599884	3566	81.022476	3500	80.563545	4298	41.946568	2234	48.718113	2352	57.494034	2877	6.99E-06	0.705081837	up	--	--	Molecular Function: metal ion binding (GO:0046872);;	K12816|2.8e-15|lhu:105678498|K12816 pre-mRNA-processing factor 17 | (RefSeq) pre-mRNA-processing factor 17 isoform X1	Spliceosome (ko03040)	[S]	Function unknown	HIT zinc finger	Zinc finger HIT domain-containing protein 2 OS=Homo sapiens OX=9606 GN=ZNHIT2 PE=1 SV=1	S	Function unknown	zinc finger HIT domain-containing protein 2 [Homo sapiens]	molecular function: binding (GO:0005488)
ENSG00000174917	C19orf70	28.584836	935	35.185111	998	32.38486	1135	21.906271	759	19.622017	623	20.498339	670	9.78E-07	0.70447317	up	--	--	Cellular Component: nucleoplasm (GO:0005654);; Cellular Component: mitochondrion (GO:0005739);; Cellular Component: MICOS complex (GO:0061617);;	--	--	--	--	MICOS complex subunit MIC13, QIL1	MICOS complex subunit MIC13 OS=Homo sapiens OX=9606 GN=MICOS13 PE=1 SV=1	S	Function unknown	MICOS complex subunit MIC13 isoform 2 precursor [Homo sapiens]	cellular component: cell (GO:0005623);; cellular component: organelle (GO:0043226);; cellular component: organelle part (GO:0044422);; cellular component: cell part (GO:0044464);; cellular component: membrane (GO:0016020);; cellular component: macromolecular complex (GO:0032991);; cellular component: membrane part (GO:0044425)
ENSG00000162078	ZG16B	23.463325	814	26.846902	779	23.985679	890	12.66659	490	13.07921	451	18.197148	660	0.000207758	0.701382215	up	--	--	Biological Process: reproduction (GO:0000003);; Molecular Function: molecular_function (GO:0003674);; Molecular Function: catalytic activity (GO:0003824);; Molecular Function: endopeptidase activity (GO:0004175);; Molecular Function: serine-type endopeptidase activity (GO:0004252);; Cellular Component: cellular_component (GO:0005575);; Cellular Component: extracellular region (GO:0005576);; Cellu…	--	--	--	--	--	--	O	Posttranslational modification, protein turnover, chaperones	--	biological process: reproduction (GO:0000003);; molecular function: catalytic activity (GO:0003824);; biological process: metabolic process (GO:0008152);; cellular component: extracellular region (GO:0005576);; cellular component: cell (GO:0005623);; cellular component: cell part (GO:0044464);; cellular component: membrane (GO:0016020);; biological process: reproductive process (GO:0022414);; bio…
ENSG00000118508	RAB32	6.481899	293	6.789613	274	7.673999	382	3.956827	197	4.464619	201	4.534868	212	0.000248339	0.701130766	up	[R]	General function prediction only	Molecular Function: GTPase activity (GO:0003924);; Molecular Function: GTP binding (GO:0005525);; Cellular Component: trans-Golgi network (GO:0005802);; Biological Process: vesicle-mediated transport (GO:0016192);; Cellular Component: vesicle (GO:0031982);;	K07918|3.2e-125|hsa:10981|K07918 Ras-related protein Rab-32 | (RefSeq) RAB32; RAB32, member RAS oncogene family	--	[T]	Signal transduction mechanisms	Ras family	Ras-related protein Rab-32 OS=Homo sapiens OX=9606 GN=RAB32 PE=1 SV=3	U	Intracellular trafficking, secretion, and vesicular transport	ras-related protein Rab-32 [Homo sapiens]	molecular function: catalytic activity (GO:0003824);; molecular function: binding (GO:0005488);; cellular component: cell (GO:0005623);; cellular component: organelle (GO:0043226);; cellular component: organelle part (GO:0044422);; cellular component: cell part (GO:0044464);; biological process: localization (GO:0051179)
ENSG00000162551	ALPL	0.707541	58	1.097171	81	1.027802	94	0.265908	29	0.439911	41	0.596723	51	0.014204051	0.700603995	up	[PR]	Inorganic ion transport and metabolism;; General function prediction only	Molecular Function: alkaline phosphatase activity (GO:0004035);;	K01077|1.7e-307|hsa:249|K01077 alkaline phosphatase [EC:3.1.3.1] | (RefSeq) ALPL, AP-TNAP, APTNAP, HOPS, TNALP, TNAP, TNSALP; alkaline phosphatase, biomineralization associated	Thiamine metabolism (ko00730);; Folate biosynthesis (ko00790)	[P]	Inorganic ion transport and metabolism	Alkaline phosphatase	Alkaline phosphatase, tissue-nonspecific isozyme OS=Homo sapiens OX=9606 GN=ALPL PE=1 SV=4	G	Carbohydrate transport and metabolism	alkaline phosphatase, tissue-nonspecific isozyme isoform 1 preproprotein [Homo sapiens]	biological process: metabolic process (GO:0008152);; biological process: cellular process (GO:0009987);; molecular function: catalytic activity (GO:0003824)
Homo_sapiens_newGene_5893	--	1.719235	133	1.737847	120	2.447017	208	1.100176	94	1.321963	102	1.015317	81	0.003911878	0.700150547	up	--	--	--	--	--	--	--	--	--	--	--	hCG2038304, partial [Homo sapiens]	--
ENSG00000196972	SMIM10L2B	0.355813	37	0.798369	73	0.558446	63	0.257026	29	0.216563	22	0.306795	33	0.017353766	0.699978081	up	--	--	--	--	--	--	--	Domain of unknown function (DUF4560)	Small integral membrane protein 10-like protein 2A OS=Homo sapiens OX=9606 GN=SMIM10L2A PE=4 SV=1	S	Function unknown	small integral membrane protein 10-like protein 2B [Homo sapiens]	--
ENSG00000137038	DMAC1	4.391764	449	5.052721	461	4.789721	539	2.683042	302	2.65144	270	3.452482	365	0.000222133	0.699440665	up	--	--	Cellular Component: cellular_component (GO:0005575);; Cellular Component: intracellular (GO:0005622);; Cellular Component: cell (GO:0005623);; Cellular Component: cytoplasm (GO:0005737);; Cellular Component: mitochondrion (GO:0005739);; Cellular Component: mitochondrial envelope (GO:0005740);; Cellular Component: mitochondrial inner membrane (GO:0005743);; Biological Process: organelle organizati…	--	--	--	--	Domain of unknown function (DUF4536)	Distal membrane-arm assembly complex protein 1 OS=Homo sapiens OX=9606 GN=DMAC1 PE=1 SV=1	S	Function unknown	distal membrane-arm assembly complex protein 1 isoform 2 [Homo sapiens]	cellular component: cell (GO:0005623);; cellular component: cell part (GO:0044464);; cellular component: organelle (GO:0043226);; cellular component: organelle part (GO:0044422);; cellular component: membrane (GO:0016020);; biological process: cellular process (GO:0009987);; biological process: cellular component organization or biogenesis (GO:0071840)
ENSG00000181458	TMEM45A	0.947764	57	1.280064	64	1.137809	77	0.394287	28	0.768464	46	0.472347	30	0.014222039	0.699334839	up	--	--	Cellular Component: integral component of membrane (GO:0016021);;	--	--	--	--	Family of unknown function (DUF716)	Transmembrane protein 45A OS=Homo sapiens OX=9606 GN=TMEM45A PE=1 SV=1	S	Function unknown	transmembrane protein 45A isoform 1 [Homo sapiens]	cellular component: membrane (GO:0016020);; cellular component: membrane part (GO:0044425)
ENSG00000136235	GPNMB	135.997824	14069	122.028169	11073	133.159555	14925	91.685527	10287	85.933307	8789	77.314179	8103	2.42E-09	0.697871064	up	--	--	Cellular Component: integral component of membrane (GO:0016021);;	K20732|0.0e+00|ptr:463289|K20732 transmembrane glycoprotein NMB | (RefSeq) GPNMB; transmembrane glycoprotein NMB isoform X2	--	--	--	PKD domain	Transmembrane glycoprotein NMB OS=Homo sapiens OX=9606 GN=GPNMB PE=1 SV=2	T	Signal transduction mechanisms	transmembrane glycoprotein NMB isoform b precursor [Homo sapiens]	cellular component: membrane (GO:0016020);; cellular component: membrane part (GO:0044425)
ENSG00000101441	CST4	180.134171	5019	187.682968	4662	204.142792	6262	114.996552	3521	109.99765	3054	138.935684	3998	3.02E-06	0.697784281	up	--	--	Biological Process: eye development (GO:0001654);; Biological Process: response to hypoxia (GO:0001666);; Biological Process: cell activation (GO:0001775);; Molecular Function: protease binding (GO:0002020);; Molecular Function: cysteine-type endopeptidase inhibitor activity (GO:0004869);; Cellular Component: basement membrane (GO:0005604);; Cellular Component: extracellular space (GO:0005615);; …	K13900|8.5e-76|hsa:1472|K13900 cystatin-S | (RefSeq) CST4; cystatin S	Salivary secretion (ko04970)	--	--	Cystatin domain	Cystatin-S OS=Homo sapiens OX=9606 GN=CST4 PE=1 SV=3	O	Posttranslational modification, protein turnover, chaperones	cystatin-S precursor [Homo sapiens]	biological process: multicellular organismal process (GO:0032501);; biological process: developmental process (GO:0032502);; biological process: single-organism process (GO:0044699);; biological process: response to stimulus (GO:0050896);; biological process: cellular process (GO:0009987);; molecular function: binding (GO:0005488);; biological process: biological regulation (GO:0065007);; molecul…
ENSG00000074800	ENO1	899.557976	59691	1210.387416	71832	1024.84734	74818	574.265628	41797	627.597512	41419	776.412519	53175	2.26E-05	0.697418831	up	[G]	Carbohydrate transport and metabolism	Cellular Component: phosphopyruvate hydratase complex (GO:0000015);; Molecular Function: magnesium ion binding (GO:0000287);; Molecular Function: phosphopyruvate hydratase activity (GO:0004634);; Cellular Component: cytosol (GO:0005829);; Cellular Component: plasma membrane (GO:0005886);; Biological Process: glycolytic process (GO:0006096);;	K01689|7.5e-248|ggo:101137139|K01689 enolase [EC:4.2.1.11] | (RefSeq) ENO1; alpha-enolase	Glycolysis / Gluconeogenesis (ko00010);; Carbon metabolism (ko01200);; Biosynthesis of amino acids (ko01230);; RNA degradation (ko03018);; HIF-1 signaling pathway (ko04066)	[G]	Carbohydrate transport and metabolism	Enolase, C-terminal TIM barrel domain	Alpha-enolase OS=Homo sapiens OX=9606 GN=ENO1 PE=1 SV=2	G	Carbohydrate transport and metabolism	alpha-enolase [Pan troglodytes]	cellular component: cell (GO:0005623);; cellular component: macromolecular complex (GO:0032991);; cellular component: cell part (GO:0044464);; molecular function: binding (GO:0005488);; molecular function: catalytic activity (GO:0003824);; cellular component: membrane (GO:0016020);; biological process: metabolic process (GO:0008152);; biological process: cellular process (GO:0009987);; biological…
ENSG00000196968	FUT11	6.422131	492	8.302554	569	6.44051	551	3.450628	291	4.91203	375	4.686804	376	0.000380051	0.697232632	up	--	--	Biological Process: protein glycosylation (GO:0006486);; Cellular Component: integral component of membrane (GO:0016021);; Cellular Component: Golgi cisterna membrane (GO:0032580);; Molecular Function: alpha-(1->3)-fucosyltransferase activity (GO:0046920);;	K11257|1.1e-268|hsa:170384|K11257 galactoside 3-L-fucosyltransferase 11 [EC:2.4.1.-] | (RefSeq) FUT11, FUCTXI; fucosyltransferase 11	--	[GE]	Carbohydrate transport and metabolism;; Amino acid transport and metabolism	Glycosyltransferase family 10 (fucosyltransferase) C-term	Alpha-(1,3)-fucosyltransferase 11 OS=Homo sapiens OX=9606 GN=FUT11 PE=1 SV=1	G	Carbohydrate transport and metabolism	alpha-(1,3)-fucosyltransferase 11 isoform 2 precursor [Homo sapiens]	biological process: metabolic process (GO:0008152);; biological process: cellular process (GO:0009987);; biological process: single-organism process (GO:0044699);; cellular component: membrane (GO:0016020);; cellular component: membrane part (GO:0044425);; cellular component: cell (GO:0005623);; cellular component: organelle (GO:0043226);; cellular component: organelle part (GO:0044422);; cellula…
ENSG00000114023	FAM162A	13.663706	1261	16.618754	1623	16.343241	1773	9.376907	973	8.91853	991	16.667686	1109	4.21E-05	0.695955629	up	--	--	Cellular Component: mitochondrion (GO:0005739);; Cellular Component: cytosol (GO:0005829);; Cellular Component: integral component of membrane (GO:0016021);;	--	--	--	--	Protein of unknown function (DUF1075)	Protein FAM162A OS=Homo sapiens OX=9606 GN=FAM162A PE=1 SV=2	S	Function unknown	protein FAM162A [Homo sapiens]	cellular component: cell (GO:0005623);; cellular component: organelle (GO:0043226);; cellular component: cell part (GO:0044464);; cellular component: membrane (GO:0016020);; cellular component: membrane part (GO:0044425)
ENSG00000102144	PGK1	178.256927	32317	281.220123	45448	225.243103	44959	118.130127	23536	140.889801	25448	167.094589	31288	0.0001353	0.69570323	up	[G]	Carbohydrate transport and metabolism	Molecular Function: phosphoglycerate kinase activity (GO:0004618);; Molecular Function: ATP binding (GO:0005524);; Biological Process: glycolytic process (GO:0006096);;	K00927|1.0e-238|hsa:5230|K00927 phosphoglycerate kinase [EC:2.7.2.3] | (RefSeq) PGK1, HEL-S-68p, MIG10, PGKA; phosphoglycerate kinase 1	Glycolysis / Gluconeogenesis (ko00010);; Carbon metabolism (ko01200);; Biosynthesis of amino acids (ko01230);; HIF-1 signaling pathway (ko04066)	[G]	Carbohydrate transport and metabolism	Phosphoglycerate kinase	Phosphoglycerate kinase 1 OS=Homo sapiens OX=9606 GN=PGK1 PE=1 SV=3	G	Carbohydrate transport and metabolism	phosphoglycerate kinase 1 isoform X1 [Nomascus leucogenys]	biological process: metabolic process (GO:0008152);; biological process: cellular process (GO:0009987);; molecular function: catalytic activity (GO:0003824);; molecular function: binding (GO:0005488);; biological process: single-organism process (GO:0044699)
ENSG00000002933	TMEM176A	2.142196	76	1.848159	79	2.623444	107	0.879728	39	0.79969	46	1.020313	60	0.011294111	0.694867923	up	--	--	Cellular Component: integral component of membrane (GO:0016021);; Biological Process: negative regulation of dendritic cell differentiation (GO:2001199);;	--	--	--	--	CD20-like family	Transmembrane protein 176A OS=Homo sapiens OX=9606 GN=TMEM176A PE=1 SV=1	S	Function unknown	hepatocellular carcinoma-associated antigen 112, isoform CRA_c [Homo sapiens]	cellular component: membrane (GO:0016020);; cellular component: membrane part (GO:0044425);; biological process: biological regulation (GO:0065007)
ENSG00000167074	TEF	7.355622	1200	7.996529	1162	7.629957	1365	4.49713	807	5.061549	823	5.175759	872	7.45E-07	0.694615847	up	--	--	Molecular Function: transcription factor activity, sequence-specific DNA binding (GO:0003700);; Cellular Component: nucleus (GO:0005634);; Biological Process: regulation of transcription from RNA polymerase II promoter (GO:0006357);; Molecular Function: sequence-specific DNA binding (GO:0043565);;	K09058|1.3e-161|ggo:101139220|K09058 thyrotrophic embryonic factor | (RefSeq) TEF; thyrotroph embryonic factor	--	[K]	Transcription	Basic region leucine zipper	Thyrotroph embryonic factor OS=Homo sapiens OX=9606 GN=TEF PE=1 SV=3	K	Transcription	thyrotroph embryonic factor [Macaca mulatta]	biological process: biological regulation (GO:0065007);; molecular function: nucleic acid binding transcription factor activity (GO:0001071);; cellular component: cell (GO:0005623);; cellular component: organelle (GO:0043226);; cellular component: cell part (GO:0044464);; molecular function: binding (GO:0005488)
ENSG00000180573	HIST1H2AC	10.255811	620	9.340169	495	12.6368	819	6.535734	429	6.795313	404	6.934743	430	7.02E-05	0.693294252	up	--	--	Cellular Component: nucleosome (GO:0000786);; Molecular Function: DNA binding (GO:0003677);; Cellular Component: nucleus (GO:0005634);; Molecular Function: protein heterodimerization activity (GO:0046982);;	K11251|1.8e-64|aju:106988039|K11251 histone H2A | (RefSeq) histone H2A type 1-C	Necroptosis (ko04217);; Alcoholism (ko05034);; Systemic lupus erythematosus (ko05322)	[B]	Chromatin structure and dynamics	C-terminus of histone H2A	Histone H2A type 1-C OS=Homo sapiens OX=9606 GN=H2AC6 PE=1 SV=3	B	Chromatin structure and dynamics	histone H2A type 1-C-like [Piliocolobus tephrosceles]	cellular component: cell (GO:0005623);; cellular component: macromolecular complex (GO:0032991);; cellular component: organelle (GO:0043226);; cellular component: organelle part (GO:0044422);; cellular component: cell part (GO:0044464);; molecular function: binding (GO:0005488)
ENSG00000225663	MCRIP1	83.741392	3713	82.502259	3228	82.851478	4014	44.471763	2284	51.873934	2301	58.874899	2750	2.19E-06	0.689270793	up	--	--	Cellular Component: cellular_component (GO:0005575);; Cellular Component: intracellular (GO:0005622);; Cellular Component: cell (GO:0005623);; Cellular Component: nucleus (GO:0005634);; Cellular Component: cytoplasm (GO:0005737);; Biological Process: biological_process (GO:0008150);; Cellular Component: cytoplasmic stress granule (GO:0010494);; Biological Process: regulation of epithelial to mese…	K17566|4.7e-17|gfr:102032806|K17566 protein phosphatase 1 regulatory subunit 27 | (RefSeq) PPP1R27; protein phosphatase 1 regulatory subunit 27	--	--	--	FAM195 family	Mapk-regulated corepressor-interacting protein 1 OS=Homo sapiens OX=9606 GN=MCRIP1 PE=1 SV=1	S	Function unknown	LOW QUALITY PROTEIN: MCRIP1 isoform 1 [Pongo abelii]	cellular component: cell (GO:0005623);; cellular component: cell part (GO:0044464);; cellular component: organelle (GO:0043226);; cellular component: macromolecular complex (GO:0032991);; biological process: biological regulation (GO:0065007)
ENSG00000114923	SLC4A3	2.068638	307	2.782769	306	2.068725	370	1.363164	246	1.136137	182	1.505387	217	0.000265748	0.688618375	up	--	--	Molecular Function: inorganic anion exchanger activity (GO:0005452);; Cellular Component: integral component of membrane (GO:0016021);;	K13856|0.0e+00|hsa:6508|K13856 solute carrier family 4 (anion exchanger), member 3 | (RefSeq) SLC4A3, AE3, CAE3/BAE3, SLC2C; solute carrier family 4 member 3	--	[P]	Inorganic ion transport and metabolism	HCO3- transporter family	Anion exchange protein 3 OS=Homo sapiens OX=9606 GN=SLC4A3 PE=1 SV=2	P	Inorganic ion transport and metabolism	anion exchange protein 3 isoform 1 [Homo sapiens]	biological process: localization (GO:0051179);; molecular function: transporter activity (GO:0005215);; cellular component: membrane (GO:0016020);; cellular component: membrane part (GO:0044425)
ENSG00000105472	CLEC11A	2.016855	107	2.30781	109	2.237685	130	1.062043	62	1.520215	80	1.222981	67	0.005774791	0.687851311	up	--	--	Molecular Function: carbohydrate binding (GO:0030246);;	K17521|2.6e-173|hsa:6320|K17521 C-type lectin domain family 11 member A | (RefSeq) CLEC11A, CLECSF3, LSLCL, P47, SCGF; C-type lectin domain containing 11A	--	[TV]	Signal transduction mechanisms;; Defense mechanisms	Lectin C-type domain	C-type lectin domain family 11 member A OS=Homo sapiens OX=9606 GN=CLEC11A PE=1 SV=1	--	--	C-type lectin domain family 11 member A precursor [Homo sapiens]	molecular function: binding (GO:0005488)
ENSG00000203724	C1orf53	24.558334	536	26.703938	520	35.273379	847	16.438623	395	16.361614	356	20.717299	468	0.000547916	0.687365062	up	--	--	--	K09373|4.7e-13|lcm:102364557|K09373 LIM homeobox protein 2/9 | (RefSeq) LHX9; LIM homeobox 9	--	--	--	Family of unknown function (DUF5522)	Uncharacterized protein C1orf53 OS=Homo sapiens OX=9606 GN=C1orf53 PE=1 SV=1	S	Function unknown	uncharacterized protein C1orf53 [Homo sapiens]	--
ENSG00000101298	SNPH	16.5917	2972	13.49618	2170	14.915962	3002	7.809431	1566	9.064434	1662	11.815958	2115	7.51E-05	0.687007928	up	--	--	Molecular Function: syntaxin-1 binding (GO:0017075);;	--	--	--	--	Golgi-localised syntaxin-1-binding clamp	Syntaphilin OS=Homo sapiens OX=9606 GN=SNPH PE=1 SV=2	U	Intracellular trafficking, secretion, and vesicular transport	syntaphilin isoform 1 [Homo sapiens]	molecular function: binding (GO:0005488)
ENSG00000197043	ANXA6	99.715489	8572	103.318265	7934	104.900516	9794	55.500639	5407	65.817831	5638	73.570968	6623	1.67E-06	0.685849751	up	--	--	Molecular Function: calcium ion binding (GO:0005509);; Molecular Function: calcium-dependent phospholipid binding (GO:0005544);; Cellular Component: mitochondrion (GO:0005739);; Biological Process: calcium ion transport (GO:0006816);; Biological Process: regulation of muscle contraction (GO:0006937);; Cellular Component: perinuclear region of cytoplasm (GO:0048471);; Biological Process: mitochond…	K17094|0.0e+00|hsa:309|K17094 annexin A6 | (RefSeq) ANXA6, ANX6, CBP68, CPB-II, p68, p70; annexin A6	--	[U]	Intracellular trafficking, secretion, and vesicular transport	Annexin	Annexin A6 OS=Homo sapiens OX=9606 GN=ANXA6 PE=1 SV=3	U	Intracellular trafficking, secretion, and vesicular transport	annexin A6 isoform 1 [Homo sapiens]	molecular function: binding (GO:0005488);; cellular component: cell (GO:0005623);; cellular component: organelle (GO:0043226);; cellular component: cell part (GO:0044464);; biological process: localization (GO:0051179);; biological process: biological regulation (GO:0065007);; biological process: cellular process (GO:0009987);; biological process: single-organism process (GO:0044699);; biological…
ENSG00000142089	IFITM3	16.6136	498	14.959283	400	16.09251	532	11.089688	366	8.757416	262	10.301857	319	0.000121403	0.6848925	up	--	--	Cellular Component: integral component of membrane (GO:0016021);;	K06566|1.7e-70|ggo:101128980|K06566 interferon induced transmembrane protein | (RefSeq) interferon-induced transmembrane protein 3 isoform X2	--	--	--	Interferon-induced transmembrane protein	Interferon-induced transmembrane protein 3 OS=Homo sapiens OX=9606 GN=IFITM3 PE=1 SV=2	S	Function unknown	interferon-induced transmembrane protein 3 [Homo sapiens]	cellular component: membrane (GO:0016020);; cellular component: membrane part (GO:0044425)
Homo_sapiens_newGene_9244	--	1.255851	160	1.790477	199	1.664743	232	1.03149	144	0.78737	101	0.965122	128	0.002837397	0.683436358	up	--	--	--	--	--	--	--	--	--	--	--	uncharacterized protein LOC117981721 isoform X2 [Pan paniscus]	--
ENSG00000143369	ECM1	4.650396	358	6.076479	409	4.100901	347	3.042202	255	3.178589	238	3.089513	244	0.000445633	0.682534859	up	--	--	Cellular Component: extracellular space (GO:0005615);; Biological Process: signal transduction (GO:0007165);;	K23867|0.0e+00|hsa:1893|K23867 extracellular matrix protein 1 | (RefSeq) ECM1, URBWD; extracellular matrix protein 1	--	--	--	Extracellular matrix protein 1 (ECM1)	Extracellular matrix protein 1 OS=Homo sapiens OX=9606 GN=ECM1 PE=1 SV=2	T	Signal transduction mechanisms	extracellular matrix protein 1 isoform 1 precursor [Homo sapiens]	cellular component: extracellular region (GO:0005576);; cellular component: extracellular region part (GO:0044421);; biological process: cellular process (GO:0009987);; biological process: biological regulation (GO:0065007)
ENSG00000135480	KRT7	959.051983	62055	1055.63578	61227	992.133102	70000	606.268467	43065	576.781395	37325	744.239651	50014	3.52E-06	0.682449395	up	--	--	Cellular Component: keratin filament (GO:0045095);;	K07605|1.6e-243|hsa:3855|K07605 type II keratin, basic | (RefSeq) KRT7, CK7, K2C7, K7, SCL; keratin 7	--	--	--	Intermediate filament protein	Keratin, type II cytoskeletal 7 OS=Homo sapiens OX=9606 GN=KRT7 PE=1 SV=5	Z	Cytoskeleton	keratin, type II cytoskeletal 7 [Homo sapiens]	cellular component: cell (GO:0005623);; cellular component: organelle (GO:0043226);; cellular component: organelle part (GO:0044422);; cellular component: cell part (GO:0044464);; cellular component: supramolecular complex (GO:0099080)
ENSG00000272196	HIST2H2AA4	14.696737	308	15.966575	298	16.524527	381	9.363061	216	8.802057	184	11.190104	242	0.000529146	0.682411843	up	--	--	Cellular Component: nucleosome (GO:0000786);; Molecular Function: DNA binding (GO:0003677);; Cellular Component: nucleus (GO:0005634);; Molecular Function: protein heterodimerization activity (GO:0046982);;	K11251|2.4e-64|aml:100466877|K11251 histone H2A | (RefSeq) histone H2A type 2-A	Necroptosis (ko04217);; Alcoholism (ko05034);; Systemic lupus erythematosus (ko05322)	[B]	Chromatin structure and dynamics	C-terminus of histone H2A	Histone H2A type 2-A OS=Homo sapiens OX=9606 GN=H2AC18 PE=1 SV=3	B	Chromatin structure and dynamics	PREDICTED: LOW QUALITY PROTEIN: uncharacterized protein LOC105821768 [Propithecus coquereli]	cellular component: cell (GO:0005623);; cellular component: macromolecular complex (GO:0032991);; cellular component: organelle (GO:0043226);; cellular component: organelle part (GO:0044422);; cellular component: cell part (GO:0044464);; molecular function: binding (GO:0005488)
ENSG00000133935	ERG28	43.987736	4297	46.001362	4006	45.716103	4917	25.667824	2756	30.446688	2963	31.928104	3222	6.55E-07	0.6822058	up	--	--	Cellular Component: integral component of membrane (GO:0016021);;	--	--	[S]	Function unknown	Erg28 like protein	Ergosterol biosynthetic protein 28 homolog OS=Homo sapiens OX=9606 GN=ERG28 PE=1 SV=1	S	Function unknown	ergosterol biosynthetic protein 28 homolog [Pongo abelii]	cellular component: membrane (GO:0016020);; cellular component: membrane part (GO:0044425)
ENSG00000168754	FAM178B	12.095084	478	14.918068	531	6.51403	597	7.31836	350	6.798471	267	8.722188	423	0.000824999	0.682198451	up	--	--	--	K06521|1.7e-09|hai:109392006|K06521 semaphorin 4 | (RefSeq) SEMA4C; semaphorin 4C	Axon guidance (ko04360)	--	--	Family of unknown function, FAM178	Protein FAM178B OS=Homo sapiens OX=9606 GN=FAM178B PE=2 SV=3	S	Function unknown	protein FAM178B isoform A [Homo sapiens]	--
ENSG00000147155	EBP	77.275399	4847	90.874291	5264	85.192257	5819	49.539715	3440	47.477552	2985	63.010067	4220	3.71E-05	0.681317834	up	--	--	Cellular Component: endoplasmic reticulum (GO:0005783);; Cellular Component: integral component of membrane (GO:0016021);; Biological Process: sterol metabolic process (GO:0016125);; Molecular Function: cholestenol delta-isomerase activity (GO:0047750);;	K01824|5.9e-135|hsa:10682|K01824 cholestenol Delta-isomerase [EC:5.3.3.5] | (RefSeq) EBP, CDPX2, CHO2, CPX, CPXD, MEND; EBP cholestenol delta-isomerase	Steroid biosynthesis (ko00100)	[I]	Lipid transport and metabolism	EXPERA (EXPanded EBP superfamily)	3-beta-hydroxysteroid-Delta(8),Delta(7)-isomerase OS=Homo sapiens OX=9606 GN=EBP PE=1 SV=3	I	Lipid transport and metabolism	3-beta-hydroxysteroid-Delta(8),Delta(7)-isomerase [Homo sapiens]	cellular component: cell (GO:0005623);; cellular component: organelle (GO:0043226);; cellular component: cell part (GO:0044464);; cellular component: membrane (GO:0016020);; cellular component: membrane part (GO:0044425);; biological process: metabolic process (GO:0008152);; biological process: single-organism process (GO:0044699);; molecular function: catalytic activity (GO:0003824)
Homo_sapiens_newGene_7875	--	15.267471	1586	19.370198	1791	18.255896	2088	9.699321	1108	11.439374	1183	12.703898	1361	3.00E-05	0.68037909	up	--	--	Cellular Component: integral component of membrane (GO:0016021);;	--	--	--	--	--	Protein MOST-1 OS=Homo sapiens OX=9606 GN=C8orf17 PE=1 SV=1	--	--	unnamed protein product [Homo sapiens]	cellular component: membrane (GO:0016020);; cellular component: membrane part (GO:0044425)
ENSG00000078804	TP53INP2	109.657233	16803	95.804959	13213	93.493104	15954	57.816982	9836	63.686397	9726	72.096509	11538	2.45E-06	0.678488131	up	--	--	Biological Process: positive regulation of autophagy (GO:0010508);; Biological Process: positive regulation of transcription, DNA-templated (GO:0045893);;	K21247|4.1e-101|hsa:58476|K21247 tumor protein p53-inducible nuclear protein 2 | (RefSeq) TP53INP2, C20orf110, DOR, PIG-U, PIGU, PINH, dJ1181N3.1; tumor protein p53 inducible nuclear protein 2	Autophagy - animal (ko04140)	--	--	DOR family	Tumor protein p53-inducible nuclear protein 2 OS=Homo sapiens OX=9606 GN=TP53INP2 PE=1 SV=2	K	Transcription	hypothetical protein [Homo sapiens]	biological process: biological regulation (GO:0065007)
ENSG00000052802	MSMO1	54.782785	4374	57.063809	4133	49.054186	4298	36.835436	3239	40.614495	3248	27.35461	2295	3.59E-06	0.677400986	up	[I]	Lipid transport and metabolism	Molecular Function: iron ion binding (GO:0005506);; Biological Process: lipid biosynthetic process (GO:0008610);; Cellular Component: integral component of membrane (GO:0016021);; Molecular Function: oxidoreductase activity (GO:0016491);;	K07750|1.2e-177|ggo:101135163|K07750 methylsterol monooxygenase [EC:1.14.18.9] | (RefSeq) MSMO1; methylsterol monooxygenase 1 isoform X1	Steroid biosynthesis (ko00100)	[I]	Lipid transport and metabolism	Fatty acid hydroxylase superfamily	Methylsterol monooxygenase 1 OS=Homo sapiens OX=9606 GN=MSMO1 PE=1 SV=1	I	Lipid transport and metabolism	methylsterol monooxygenase 1 [Pongo abelii]	molecular function: binding (GO:0005488);; biological process: metabolic process (GO:0008152);; biological process: single-organism process (GO:0044699);; cellular component: membrane (GO:0016020);; cellular component: membrane part (GO:0044425);; molecular function: catalytic activity (GO:0003824)
ENSG00000087076	HSD17B14	3.533369	159	3.830394	155	4.724395	235	2.125682	108	2.37964	109	2.711978	126	0.003283649	0.677128993	up	[IQR]	Lipid transport and metabolism;; Secondary metabolites biosynthesis, transport and catabolism;; General function prediction only	Molecular Function: oxidoreductase activity (GO:0016491);;	K00826|3.8e-93|ocu:100358400|K00826 branched-chain amino acid aminotransferase [EC:2.6.1.42] | (RefSeq) BCAT2; branched chain amino acid transaminase 2	Cysteine and methionine metabolism (ko00270);; Valine, leucine and isoleucine degradation (ko00280);; Valine, leucine and isoleucine biosynthesis (ko00290);; Pantothenate and CoA biosynthesis (ko00770);; 2-Oxocarboxylic acid metabolism (ko01210);; Biosynthesis of amino acids (ko01230)	[R]	General function prediction only	Enoyl-(Acyl carrier protein) reductase	17-beta-hydroxysteroid dehydrogenase 14 OS=Homo sapiens OX=9606 GN=HSD17B14 PE=1 SV=1	Q	Secondary metabolites biosynthesis, transport and catabolism	17-beta-hydroxysteroid dehydrogenase 14 [Homo sapiens]	molecular function: catalytic activity (GO:0003824)
ENSG00000134824	FADS2	883.662887	107458	994.618326	104199	887.080783	120138	562.676508	74128	552.988599	68526	690.788485	83674	4.10E-07	0.676641126	up	[I]	Lipid transport and metabolism	Biological Process: lipid metabolic process (GO:0006629);; Cellular Component: integral component of membrane (GO:0016021);; Molecular Function: oxidoreductase activity (GO:0016491);;	K10226|3.0e-260|hsa:9415|K10226 acyl-CoA 6-desaturase (Delta-6 desaturase) [EC:1.14.19.3] | (RefSeq) FADS2, D6D, DES6, FADSD6, LLCDL2, SLL0262, TU13; fatty acid desaturase 2	alpha-Linolenic acid metabolism (ko00592);; Biosynthesis of unsaturated fatty acids (ko01040);; Fatty acid metabolism (ko01212);; PPAR signaling pathway (ko03320)	[I]	Lipid transport and metabolism	Fatty acid desaturase	Acyl-CoA 6-desaturase OS=Homo sapiens OX=9606 GN=FADS2 PE=1 SV=1	I	Lipid transport and metabolism	acyl-CoA 6-desaturase isoform 1 [Pan troglodytes]	biological process: metabolic process (GO:0008152);; biological process: single-organism process (GO:0044699);; cellular component: membrane (GO:0016020);; cellular component: membrane part (GO:0044425);; molecular function: catalytic activity (GO:0003824)
ENSG00000198832	SELENOM	2.81469	73	2.691684	64	2.264034	65	0.78535	34	1.305418	36	1.568642	43	0.01526582	0.676560894	up	--	--	Biological Process: system process (GO:0003008);; Cellular Component: cellular_component (GO:0005575);; Cellular Component: intracellular (GO:0005622);; Cellular Component: cell (GO:0005623);; Cellular Component: cytoplasm (GO:0005737);; Cellular Component: endoplasmic reticulum (GO:0005783);; Cellular Component: Golgi apparatus (GO:0005794);; Biological Process: transport (GO:0006810);; Biologic…	--	--	--	--	Sep15/SelM redox domain	Selenoprotein M OS=Homo sapiens OX=9606 GN=SELENOM PE=1 SV=3	S	Function unknown	selenoprotein M precursor [Pan troglodytes]	biological process: multicellular organismal process (GO:0032501);; cellular component: cell (GO:0005623);; cellular component: cell part (GO:0044464);; cellular component: organelle (GO:0043226);; biological process: localization (GO:0051179);; biological process: single-organism process (GO:0044699);; biological process: cellular process (GO:0009987);; biological process: signaling (GO:0023052)…
ENSG00000010278	CD9	545.76292	24543	642.711419	26098	603.301003	30504	344.491422	17068	378.626346	17313	439.809536	20629	3.82E-06	0.674214465	up	--	--	Cellular Component: integral component of membrane (GO:0016021);;	K06460|1.4e-125|hsa:928|K06460 CD9 antigen | (RefSeq) CD9, BTCC-1, DRAP-27, MIC3, MRP-1, TSPAN-29, TSPAN29; CD9 molecule	Hematopoietic cell lineage (ko04640)	[R]	General function prediction only	Tetraspanin family	CD9 antigen OS=Homo sapiens OX=9606 GN=CD9 PE=1 SV=4	S	Function unknown	CD9 antigen isoform 1 [Homo sapiens]	cellular component: membrane (GO:0016020);; cellular component: membrane part (GO:0044425)
Homo_sapiens_newGene_7194	--	1.880334	285	1.23776	167	1.039489	174	0.084392	15	0.294142	45	1.102098	173	0.022861291	0.673765139	up	--	--	--	--	--	--	--	--	--	--	--	--	--
ENSG00000196976	LAGE3	23.50436	828	24.286312	763	23.040613	894	14.202648	550	12.840035	451	17.931221	653	0.000173396	0.673160962	up	--	--	Cellular Component: EKC/KEOPS complex (GO:0000408);; Cellular Component: cellular_component (GO:0005575);; Cellular Component: intracellular (GO:0005622);; Cellular Component: cell (GO:0005623);; Cellular Component: nucleus (GO:0005634);; Cellular Component: nucleoplasm (GO:0005654);; Cellular Component: cytoplasm (GO:0005737);; Cellular Component: nuclear body (GO:0016604);; Cellular Component: …	K15902|8.6e-68|hsa:8270|K15902 EKC/KEOPS complex subunit PCC1/LAGE3 | (RefSeq) LAGE3, CVG5, DXS9879E, DXS9951E, ESO3, GAMOS2, ITBA2, Pcc1; L antigen family member 3	--	--	--	Transcription factor Pcc1	EKC/KEOPS complex subunit LAGE3 OS=Homo sapiens OX=9606 GN=LAGE3 PE=1 SV=2	S	Function unknown	EKC/KEOPS complex subunit LAGE3 [Homo sapiens]	cellular component: cell (GO:0005623);; cellular component: macromolecular complex (GO:0032991);; cellular component: cell part (GO:0044464);; cellular component: organelle (GO:0043226);; cellular component: organelle part (GO:0044422);; cellular component: membrane-enclosed lumen (GO:0031974)
ENSG00000185303	SFTPA2	4.218032	319	5.882821	344	5.480083	478	3.118465	259	3.058834	237	3.587526	256	0.000405121	0.67229591	up	--	--	--	K10067|4.5e-96|hsa:729238|K10067 pulmonary surfactant-associated protein A | (RefSeq) SFTPA2, COLEC5, PSAP, PSP-A, PSPA, SFTP1, SFTPA2B, SP-2A, SP-A, SPA2, SPAII; surfactant protein A2	Phagosome (ko04145);; Pertussis (ko05133)	[TV]	Signal transduction mechanisms;; Defense mechanisms	Lectin C-type domain	Pulmonary surfactant-associated protein A2 OS=Homo sapiens OX=9606 GN=SFTPA2 PE=1 SV=1	--	--	pulmonary surfactant-associated protein A2 isoform 1 precursor [Homo sapiens]	--
ENSG00000274180	NATD1	3.257964	596	3.379317	552	3.254895	656	1.798865	362	2.325458	424	2.242346	424	7.30E-05	0.671346233	up	[R]	General function prediction only	--	K06975|1.4e-60|hsa:256302|K06975 uncharacterized protein | (RefSeq) NATD1, C17orf103, Gtlf3b; N-acetyltransferase domain containing 1	--	--	--	GCN5-related N-acetyl-transferase	Protein NATD1 OS=Homo sapiens OX=9606 GN=NATD1 PE=1 SV=2	S	Function unknown	protein NATD1 [Homo sapiens]	--
ENSG00000067064	IDI1	135.443801	11709	143.252833	10882	123.041048	11943	70.695045	8251	86.73027	8705	64.494909	7042	2.07E-08	0.668399833	up	[I]	Lipid transport and metabolism	Molecular Function: hydrolase activity (GO:0016787);;	K01823|1.1e-130|ggo:101131151|K01823 isopentenyl-diphosphate Delta-isomerase [EC:5.3.3.2] | (RefSeq) IDI1; isopentenyl-diphosphate Delta-isomerase 1 isoform X2	Terpenoid backbone biosynthesis (ko00900)	[Q]	Secondary metabolites biosynthesis, transport and catabolism	NUDIX domain	Isopentenyl-diphosphate Delta-isomerase 1 OS=Homo sapiens OX=9606 GN=IDI1 PE=1 SV=2	Q	Secondary metabolites biosynthesis, transport and catabolism	IDI1 protein, partial [Homo sapiens]	molecular function: catalytic activity (GO:0003824)
ENSG00000106066	CPVL	1.641012	117	2.013058	129	2.191318	169	0.987555	84	1.245977	91	1.149851	85	0.004986393	0.668062416	up	[E]	Amino acid transport and metabolism	Molecular Function: serine-type carboxypeptidase activity (GO:0004185);;	K09645|5.8e-286|hsa:54504|K09645 vitellogenic carboxypeptidase-like protein [EC:3.4.16.-] | (RefSeq) CPVL, HVLP; carboxypeptidase vitellogenic like	--	[OE]	Posttranslational modification, protein turnover, chaperones;; Amino acid transport and metabolism	Serine carboxypeptidase	Probable serine carboxypeptidase CPVL OS=Homo sapiens OX=9606 GN=CPVL PE=1 SV=2	O	Posttranslational modification, protein turnover, chaperones	probable serine carboxypeptidase CPVL isoform b precursor [Homo sapiens]	biological process: metabolic process (GO:0008152);; molecular function: catalytic activity (GO:0003824)
ENSG00000148671	ADIRF	119.476646	3911	130.144589	3839	120.828711	4410	69.132799	2465	72.161176	2341	98.762587	3341	9.90E-05	0.667960422	up	--	--	Cellular Component: nucleoplasm (GO:0005654);; Cellular Component: cytosol (GO:0005829);; Biological Process: positive regulation of fat cell differentiation (GO:0045600);;	K21408|8.8e-11|csab:103215869|K21408 adipogenesis regulatory factor | (RefSeq) ADIRF; adipogenesis regulatory factor	--	--	--	--	Adipogenesis regulatory factor OS=Homo sapiens OX=9606 GN=ADIRF PE=1 SV=1	K	Transcription	adipogenesis regulatory factor isoform X3 [Pan paniscus]	cellular component: cell (GO:0005623);; cellular component: organelle (GO:0043226);; cellular component: organelle part (GO:0044422);; cellular component: cell part (GO:0044464);; biological process: biological regulation (GO:0065007)
ENSG00000166562	SEC11C	53.647499	2294	58.705302	2148	57.55245	2615	34.739163	1693	40.77008	1569	36.873861	1628	1.07E-08	0.666729131	up	[U]	Intracellular trafficking, secretion, and vesicular transport	Cellular Component: signal peptidase complex (GO:0005787);; Biological Process: signal peptide processing (GO:0006465);; Molecular Function: serine-type peptidase activity (GO:0008236);; Cellular Component: integral component of membrane (GO:0016021);;	K13280|3.5e-83|ggo:101148433|K13280 signal peptidase I [EC:3.4.21.89] | (RefSeq) SEC11C; signal peptidase complex catalytic subunit SEC11C	Protein export (ko03060)	[U]	Intracellular trafficking, secretion, and vesicular transport	Peptidase S24-like	Signal peptidase complex catalytic subunit SEC11C OS=Homo sapiens OX=9606 GN=SEC11C PE=1 SV=3	U	Intracellular trafficking, secretion, and vesicular transport	signal peptidase complex catalytic subunit SEC11C isoform X2 [Nomascus leucogenys]	cellular component: cell (GO:0005623);; cellular component: membrane (GO:0016020);; cellular component: macromolecular complex (GO:0032991);; cellular component: organelle (GO:0043226);; cellular component: organelle part (GO:0044422);; cellular component: membrane part (GO:0044425);; cellular component: cell part (GO:0044464);; biological process: metabolic process (GO:0008152);; biological proc…
Homo_sapiens_newGene_2652	--	0.46873	60	0.4061	46	0.535129	75	0.160316	23	0.044704	6	0.308438	41	0.024508723	0.666611567	up	--	--	--	K17985|2.4e-16|hsa:55626|K17985 activating molecule in BECN1-regulated autophagy protein 1 | (RefSeq) AMBRA1, DCAF3, WDR94; autophagy and beclin 1 regulator 1	Mitophagy - animal (ko04137);; Autophagy - animal (ko04140);; Alzheimer disease (ko05010);; Amyotrophic lateral sclerosis (ko05014);; Huntington disease (ko05016);; Spinocerebellar ataxia (ko05017)	--	--	--	Uncharacterized protein C9orf85 OS=Homo sapiens OX=9606 GN=C9orf85 PE=1 SV=1	--	--	hypothetical protein EGM_17802, partial [Macaca fascicularis]	--
ENSG00000180992	MRPL14	50.1539	1785	66.200264	2100	57.228802	2242	34.496201	1349	36.834274	1306	41.383095	1521	1.99E-05	0.66586276	up	[J]	Translation, ribosomal structure and biogenesis	Molecular Function: structural constituent of ribosome (GO:0003735);; Cellular Component: mitochondrion (GO:0005739);; Cellular Component: ribosome (GO:0005840);; Biological Process: translation (GO:0006412);;	K02874|7.6e-80|hsa:64928|K02874 large subunit ribosomal protein L14 | (RefSeq) MRPL14, L14mt, L32mt, MRP-L14, MRP-L32, MRPL32, RMPL32, RPML32; mitochondrial ribosomal protein L14	Ribosome (ko03010)	[J]	Translation, ribosomal structure and biogenesis	Ribosomal protein L14p/L23e	39S ribosomal protein L14, mitochondrial OS=Homo sapiens OX=9606 GN=MRPL14 PE=1 SV=1	J	Translation, ribosomal structure and biogenesis	39S ribosomal protein L14, mitochondrial isoform b [Homo sapiens]	molecular function: structural molecule activity (GO:0005198);; cellular component: cell (GO:0005623);; cellular component: organelle (GO:0043226);; cellular component: cell part (GO:0044464);; cellular component: macromolecular complex (GO:0032991);; biological process: metabolic process (GO:0008152);; biological process: cellular process (GO:0009987)
ENSG00000112149	CD83	0.829397	77	1.176962	97	0.736607	75	0.413344	42	0.381493	34	0.645632	62	0.019036508	0.665590715	up	--	--	Cellular Component: integral component of membrane (GO:0016021);;	K06510|5.1e-114|hsa:9308|K06510 CD83 antigen | (RefSeq) CD83, BL11, HB15; CD83 molecule	--	--	--	Immunoglobulin V-set domain	CD83 antigen OS=Homo sapiens OX=9606 GN=CD83 PE=1 SV=1	T	Signal transduction mechanisms	CD83 antigen isoform a precursor [Homo sapiens]	cellular component: membrane (GO:0016020);; cellular component: membrane part (GO:0044425)
ENSG00000204386	NEU1	94.337551	7103	87.187989	5832	93.539518	7778	54.370407	4490	55.807217	4206	68.632788	5371	8.47E-06	0.664938392	up	[GM]	Carbohydrate transport and metabolism;; Cell wall/membrane/envelope biogenesis	Molecular Function: exo-alpha-sialidase activity (GO:0004308);; Cellular Component: lysosome (GO:0005764);; Cellular Component: integral component of membrane (GO:0016021);; Cellular Component: cell junction (GO:0030054);; Cellular Component: intracellular membrane-bounded organelle (GO:0043231);;	K01186|2.2e-249|ggo:101139428|K01186 sialidase-1 [EC:3.2.1.18] | (RefSeq) NEU1; sialidase-1 isoform X1	Other glycan degradation (ko00511);; Sphingolipid metabolism (ko00600);; Lysosome (ko04142)	--	--	BNR repeat-like domain	Sialidase-1 OS=Homo sapiens OX=9606 GN=NEU1 PE=1 SV=1	I	Lipid transport and metabolism	sialidase-1 precursor [Homo sapiens]	molecular function: catalytic activity (GO:0003824);; cellular component: cell (GO:0005623);; cellular component: organelle (GO:0043226);; cellular component: cell part (GO:0044464);; cellular component: membrane (GO:0016020);; cellular component: membrane part (GO:0044425);; cellular component: cell junction (GO:0030054)
ENSG00000163739	CXCL1	8.085087	330	4.421957	161	6.150736	276	3.646797	164	2.590287	106	4.567873	192	0.009481905	0.66470112	up	--	--	Cellular Component: extracellular space (GO:0005615);; Biological Process: defense response (GO:0006952);; Biological Process: immune response (GO:0006955);; Molecular Function: chemokine activity (GO:0008009);;	K05505|4.3e-48|ggo:101131798|K05505 C-X-C motif chemokine 1/2/3 | (RefSeq) CXCL1; growth-regulated alpha protein	Cytokine-cytokine receptor interaction (ko04060);; Viral protein interaction with cytokine and cytokine receptor (ko04061);; Chemokine signaling pathway (ko04062);; NF-kappa B signaling pathway (ko04064);; NOD-like receptor signaling pathway (ko04621);; IL-17 signaling pathway (ko04657);; TNF signaling pathway (ko04668);; Legionellosis (ko05134);; Amoebiasis (ko05146);; Kaposi sarcoma-associated …	--	--	Small cytokines (intecrine/chemokine), interleukin-8 like	Growth-regulated alpha protein OS=Homo sapiens OX=9606 GN=CXCL1 PE=1 SV=1	W	Extracellular structures	growth-regulated alpha protein precursor [Homo sapiens]	cellular component: extracellular region (GO:0005576);; cellular component: extracellular region part (GO:0044421);; biological process: response to stimulus (GO:0050896);; biological process: immune system process (GO:0002376);; molecular function: binding (GO:0005488)
ENSG00000104140	RHOV	26.694494	1689	25.837847	1457	28.426908	1980	16.063536	1117	16.884258	1064	19.862324	1298	1.33E-05	0.663785815	up	[R]	General function prediction only	Molecular Function: GTPase activity (GO:0003924);; Molecular Function: GTP binding (GO:0005525);; Biological Process: small GTPase mediated signal transduction (GO:0007264);;	K07866|6.1e-127|cjc:100408795|K07866 Ras homolog gene family, member V | (RefSeq) RHOV; ras homolog family member V	--	[R]	General function prediction only	Ras family	Rho-related GTP-binding protein RhoV OS=Homo sapiens OX=9606 GN=RHOV PE=1 SV=1	S	Function unknown	rho-related GTP-binding protein RhoV [Homo sapiens]	molecular function: catalytic activity (GO:0003824);; molecular function: binding (GO:0005488);; biological process: cellular process (GO:0009987);; biological process: signaling (GO:0023052);; biological process: single-organism process (GO:0044699);; biological process: response to stimulus (GO:0050896);; biological process: biological regulation (GO:0065007)
Homo_sapiens_newGene_1234	--	2.33218	186	2.911806	175	1.913932	165	1.029904	80	1.395158	98	1.806577	142	0.009760041	0.661518194	up	--	--	--	--	--	--	--	--	--	--	--	--	--
ENSG00000132744	ACY3	1.679977	80	2.115904	91	2.131129	114	1.351495	68	0.62176	30	1.257475	63	0.019061528	0.658715848	up	[R]	General function prediction only	Molecular Function: aminoacylase activity (GO:0004046);; Cellular Component: cytoplasm (GO:0005737);; Cellular Component: apical plasma membrane (GO:0016324);; Molecular Function: hydrolase activity, acting on ester bonds (GO:0016788);; Molecular Function: identical protein binding (GO:0042802);; Molecular Function: metal ion binding (GO:0046872);;	K18458|1.9e-184|hsa:91703|K18458 N-acyl-aromatic-L-amino acid amidohydrolase [EC:3.5.1.114] | (RefSeq) ACY3, ACY-3, HCBP1; aminoacylase 3	--	--	--	Succinylglutamate desuccinylase / Aspartoacylase family	N-acyl-aromatic-L-amino acid amidohydrolase (carboxylate-forming) OS=Homo sapiens OX=9606 GN=ACY3 PE=1 SV=1	E	Amino acid transport and metabolism	N-acyl-aromatic-L-amino acid amidohydrolase (carboxylate-forming) [Homo sapiens]	molecular function: catalytic activity (GO:0003824);; cellular component: cell (GO:0005623);; cellular component: cell part (GO:0044464);; cellular component: membrane (GO:0016020);; cellular component: membrane part (GO:0044425);; molecular function: binding (GO:0005488)
ENSG00000132196	HSD17B7	40.429039	1753	43.917171	1713	40.0196	1913	27.775512	1342	27.216488	1151	27.923522	1256	2.01E-07	0.658172003	up	[IQR]	Lipid transport and metabolism;; Secondary metabolites biosynthesis, transport and catabolism;; General function prediction only	Molecular Function: 3-keto sterol reductase activity (GO:0000253);; Cellular Component: endoplasmic reticulum (GO:0005783);; Biological Process: cholesterol biosynthetic process (GO:0006695);; Biological Process: nervous system development (GO:0007399);; Biological Process: cell differentiation (GO:0030154);; Biological Process: embryonic skeletal system development (GO:0048706);;	K13373|1.0e-191|hsa:51478|K13373 17beta-estradiol 17-dehydrogenase / 3beta-hydroxysteroid 3-dehydrogenase [EC:1.1.1.62 1.1.1.270] | (RefSeq) HSD17B7, PRAP, SDR37C1; hydroxysteroid 17-beta dehydrogenase 7	Steroid biosynthesis (ko00100);; Steroid hormone biosynthesis (ko00140);; Ovarian steroidogenesis (ko04913)	[I]	Lipid transport and metabolism	short chain dehydrogenase	3-keto-steroid reductase/17-beta-hydroxysteroid dehydrogenase 7 OS=Homo sapiens OX=9606 GN=HSD17B7 PE=1 SV=1	Q	Secondary metabolites biosynthesis, transport and catabolism	3-keto-steroid reductase/17-beta-hydroxysteroid dehydrogenase 7 isoform 1 [Homo sapiens]	biological process: metabolic process (GO:0008152);; biological process: single-organism process (GO:0044699);; molecular function: catalytic activity (GO:0003824);; cellular component: cell (GO:0005623);; cellular component: organelle (GO:0043226);; cellular component: cell part (GO:0044464);; biological process: multicellular organismal process (GO:0032501);; biological process: developmental p…
ENSG00000166816	LDHD	4.234137	321	5.648234	384	5.245175	437	2.609119	217	3.100952	231	3.848548	298	0.001875301	0.657664067	up	[C]	Energy production and conversion	Molecular Function: molecular_function (GO:0003674);; Molecular Function: catalytic activity (GO:0003824);; Molecular Function: lactate dehydrogenase activity (GO:0004457);; Cellular Component: cellular_component (GO:0005575);; Cellular Component: intracellular (GO:0005622);; Cellular Component: cell (GO:0005623);; Cellular Component: cytoplasm (GO:0005737);; Cellular Component: mitochondrion (GO…	K00102|8.3e-299|hsa:197257|K00102 D-lactate dehydrogenase (cytochrome) [EC:1.1.2.4] | (RefSeq) LDHD, DLACD, DLD; lactate dehydrogenase D	Pyruvate metabolism (ko00620)	[C]	Energy production and conversion	FAD linked oxidases, C-terminal domain	Probable D-lactate dehydrogenase, mitochondrial OS=Homo sapiens OX=9606 GN=LDHD PE=1 SV=1	C	Energy production and conversion	probable D-lactate dehydrogenase, mitochondrial isoform 1 precursor [Homo sapiens]	molecular function: catalytic activity (GO:0003824);; biological process: metabolic process (GO:0008152);; biological process: single-organism process (GO:0044699);; cellular component: cell (GO:0005623);; cellular component: cell part (GO:0044464);; cellular component: organelle (GO:0043226);; cellular component: organelle part (GO:0044422);; cellular component: membrane (GO:0016020);; biologica…
ENSG00000204128	C2orf72	3.164597	430	3.343509	405	3.10718	465	1.706026	255	2.041065	276	2.389915	335	0.000626351	0.657152484	up	--	--	--	--	--	--	--	Domain of unknown function (DUF4630)	Uncharacterized protein C2orf72 OS=Homo sapiens OX=9606 GN=C2orf72 PE=1 SV=2	S	Function unknown	uncharacterized protein C2orf72 [Homo sapiens]	--
ENSG00000228474	OST4	127.675418	2511	132.855271	2317	127.90983	2741	77.418739	1771	72.717438	1508	94.538705	1934	5.83E-06	0.656795797	up	--	--	--	K13355|5.4e-06|phu:Phum_PHUM379780|K13355 nucleoside diphosphate-linked moiety X motif 19, mitochondrial [EC:3.6.1.-] | (RefSeq) Nucleoside diphosphate-linked moiety X motif, putative	Peroxisome (ko04146)	--	--	Oligosaccaryltransferase	Dolichyl-diphosphooligosaccharide--protein glycosyltransferase subunit 4 OS=Homo sapiens OX=9606 GN=OST4 PE=1 SV=1	S	Function unknown	dolichyl-diphosphooligosaccharide--protein glycosyltransferase subunit 4 [Piliocolobus tephrosceles]	--
ENSG00000169976	SF3B5	90.020294	2315	100.51001	2304	114.713524	3247	60.051109	1697	58.245678	1492	78.864731	2095	0.000153429	0.656759559	up	--	--	Biological Process: RNA splicing, via transesterification reactions (GO:0000375);; Biological Process: RNA splicing, via transesterification reactions with bulged adenosine as nucleophile (GO:0000377);; Biological Process: mRNA splicing, via spliceosome (GO:0000398);; Cellular Component: cellular_component (GO:0005575);; Cellular Component: intracellular (GO:0005622);; Cellular Component: cell (G…	K12832|1.2e-45|aju:106965787|K12832 splicing factor 3B subunit 5 | (RefSeq) SF3B5; splicing factor 3B subunit 5	Spliceosome (ko03040)	[S]	Function unknown	Splicing factor 3B subunit 10 (SF3b10)	Splicing factor 3B subunit 5 OS=Homo sapiens OX=9606 GN=SF3B5 PE=1 SV=1	A	RNA processing and modification	splicing factor 3B subunit 5-like [Piliocolobus tephrosceles]	biological process: metabolic process (GO:0008152);; biological process: cellular process (GO:0009987);; cellular component: cell (GO:0005623);; cellular component: cell part (GO:0044464);; cellular component: organelle (GO:0043226);; cellular component: organelle part (GO:0044422);; cellular component: macromolecular complex (GO:0032991);; cellular component: membrane-enclosed lumen (GO:0031974)
ENSG00000021300	PLEKHB1	2.102704	153	2.281055	147	2.232769	177	1.187784	98	1.566356	107	1.505977	104	0.003275966	0.655997646	up	--	--	Cellular Component: integral component of membrane (GO:0016021);; Biological Process: regulation of cell differentiation (GO:0045595);;	K06569|1.9e-22|pki:111847358|K06569 melanoma-associated antigen p97 | (RefSeq) otolith matrix protein 1-like	--	--	--	PH domain	Pleckstrin homology domain-containing family B member 1 OS=Homo sapiens OX=9606 GN=PLEKHB1 PE=1 SV=1	T	Signal transduction mechanisms	pleckstrin homology domain-containing family B member 1 isoform a [Homo sapiens]	cellular component: membrane (GO:0016020);; cellular component: membrane part (GO:0044425);; biological process: biological regulation (GO:0065007)
ENSG00000125652	ALKBH7	31.898296	1575	40.318873	1767	35.213552	1907	22.954098	1245	22.393359	1101	25.275555	1283	8.02E-06	0.655532337	up	[L]	Replication, recombination and repair	Cellular Component: mitochondrion (GO:0005739);; Cellular Component: mitochondrial matrix (GO:0005759);; Biological Process: cellular response to DNA damage stimulus (GO:0006974);; Biological Process: regulation of mitochondrial membrane permeability involved in programmed necrotic cell death (GO:1902445);;	K10769|5.0e-123|hsa:84266|K10769 alkylated DNA repair protein alkB homolog 7 [EC:1.14.11.-] | (RefSeq) ALKBH7, ABH7, SPATA11, UNQ6002; alkB homolog 7	--	[S]	Function unknown	2OG-Fe(II) oxygenase superfamily	Alpha-ketoglutarate-dependent dioxygenase alkB homolog 7, mitochondrial OS=Homo sapiens OX=9606 GN=ALKBH7 PE=1 SV=1	L	Replication, recombination and repair	alpha-ketoglutarate-dependent dioxygenase alkB homolog 7, mitochondrial precursor [Homo sapiens]	cellular component: cell (GO:0005623);; cellular component: organelle (GO:0043226);; cellular component: cell part (GO:0044464);; cellular component: membrane-enclosed lumen (GO:0031974);; cellular component: organelle part (GO:0044422);; biological process: cellular process (GO:0009987);; biological process: response to stimulus (GO:0050896);; biological process: single-organism process (GO:0044…
Homo_sapiens_newGene_587	--	4.528675	896	5.57017	993	4.479868	940	2.510831	573	3.627772	683	3.482535	674	0.000149381	0.654757828	up	--	--	--	--	--	--	--	--	--	--	--	--	--
Homo_sapiens_newGene_6271	--	0.947749	115	1.308988	142	1.360088	182	0.718332	96	0.564462	69	0.847697	106	0.009621024	0.653935918	up	--	--	--	--	--	--	--	--	--	--	--	--	--
ENSG00000188505	NCCRP1	0.715099	53	0.858684	57	0.895609	73	0.389383	32	0.543879	40	0.399185	31	0.020670366	0.652745007	up	--	--	Cellular Component: cellular_component (GO:0005575);; Cellular Component: intracellular (GO:0005622);; Cellular Component: cell (GO:0005623);; Cellular Component: cytoplasm (GO:0005737);; Biological Process: biological_process (GO:0008150);; Biological Process: positive regulation of cell proliferation (GO:0008284);; Biological Process: regulation of cell proliferation (GO:0042127);; Cellular Com…	K10102|9.2e-26|xla:108698654|K10102 F-box protein 27 | (RefSeq) F-box only protein 27-like	--	--	--	F-box associated region	F-box only protein 50 OS=Homo sapiens OX=9606 GN=NCCRP1 PE=1 SV=1	B	Chromatin structure and dynamics	F-box only protein 50 [Homo sapiens]	cellular component: cell (GO:0005623);; cellular component: cell part (GO:0044464);; biological process: biological regulation (GO:0065007)
ENSG00000274791	F8A2	6.475536	269	5.683202	210	3.376773	154	1.074604	49	0.721807	30	4.648812	199	0.029165114	0.649649598	up	--	--	Cellular Component: cellular_component (GO:0005575);; Cellular Component: intracellular (GO:0005622);; Cellular Component: cell (GO:0005623);; Cellular Component: nucleus (GO:0005634);; Cellular Component: cytoplasm (GO:0005737);; Cellular Component: organelle (GO:0043226);; Cellular Component: membrane-bounded organelle (GO:0043227);; Cellular Component: intracellular organelle (GO:0043229);; Ce…	K20135|1.1e-183|hsa:474383|K20135 factor VIII intron 22 protein | (RefSeq) F8A2, HAP40; coagulation factor VIII associated 2	--	--	--	Soluble NSF attachment protein, SNAP	40-kDa huntingtin-associated protein OS=Homo sapiens OX=9606 GN=F8A1 PE=1 SV=2	S	Function unknown	40-kDa huntingtin-associated protein [Homo sapiens]	cellular component: cell (GO:0005623);; cellular component: cell part (GO:0044464);; cellular component: organelle (GO:0043226)
ENSG00000128311	TST	52.948426	2477	56.354739	2377	60.508699	3362	35.871942	1908	31.330756	1621	43.302023	2093	3.23E-05	0.649545612	up	[P]	Inorganic ion transport and metabolism	Molecular Function: thiosulfate sulfurtransferase activity (GO:0004792);;	K01011|4.9e-174|hsa:7263|K01011 thiosulfate/3-mercaptopyruvate sulfurtransferase [EC:2.8.1.1 2.8.1.2] | (RefSeq) TST, RDS; thiosulfate sulfurtransferase	Cysteine and methionine metabolism (ko00270);; Sulfur metabolism (ko00920);; Sulfur relay system (ko04122)	[V]	Defense mechanisms	Rhodanese-like domain	Thiosulfate sulfurtransferase OS=Homo sapiens OX=9606 GN=TST PE=1 SV=4	H	Coenzyme transport and metabolism	thiosulfate sulfurtransferase [Homo sapiens]	molecular function: catalytic activity (GO:0003824)
ENSG00000176428	VPS37D	7.372501	445	9.727057	523	9.9937	663	4.364658	289	5.530408	327	7.147813	445	0.002618042	0.649537653	up	--	--	Cellular Component: ESCRT I complex (GO:0000813);; Biological Process: protein transport (GO:0015031);; Biological Process: endosome transport via multivesicular body sorting pathway (GO:0032509);;	K12185|3.4e-120|csab:103246633|K12185 ESCRT-I complex subunit VPS37 | (RefSeq) VPS37D; VPS37D, ESCRT-I subunit	Endocytosis (ko04144)	--	--	Modifier of rudimentary (Mod(r)) protein	Vacuolar protein sorting-associated protein 37D OS=Homo sapiens OX=9606 GN=VPS37D PE=1 SV=2	U	Intracellular trafficking, secretion, and vesicular transport	vacuolar protein sorting-associated protein 37D [Gorilla gorilla gorilla]	cellular component: cell (GO:0005623);; cellular component: membrane (GO:0016020);; cellular component: macromolecular complex (GO:0032991);; cellular component: organelle (GO:0043226);; cellular component: organelle part (GO:0044422);; cellular component: membrane part (GO:0044425);; cellular component: cell part (GO:0044464);; biological process: localization (GO:0051179);; biological process: …
Homo_sapiens_newGene_4439	--	171.732864	7607	145.90593	5761	118.730728	5791	80.408165	3915	114.517807	5054	91.39151	4182	0.000134158	0.648658098	up	--	--	--	--	--	--	--	--	--	--	--	--	--
ENSG00000108786	HSD17B1	4.857945	898	5.470066	902	6.980155	1099	9.011213	465	9.299968	435	5.511675	921	0.006885387	0.647908755	up	[C]	Energy production and conversion	Molecular Function: estradiol 17-beta-dehydrogenase activity (GO:0004303);; Cellular Component: cytosol (GO:0005829);; Biological Process: estrogen biosynthetic process (GO:0006703);; Molecular Function: testosterone dehydrogenase (NAD+) activity (GO:0047035);; Biological Process: bone development (GO:0060348);; Biological Process: testosterone biosynthetic process (GO:0061370);; Biological Proce…	K00044|4.0e-177|hsa:3292|K00044 17beta-estradiol 17-dehydrogenase [EC:1.1.1.62] | (RefSeq) HSD17B1, 17-beta-HSD, 20-alpha-HSD, E2DH, EDH17B2, EDHB17, HSD17, SDR28C1; hydroxysteroid 17-beta dehydrogenase 1	Steroid hormone biosynthesis (ko00140);; Ovarian steroidogenesis (ko04913)	[Q]	Secondary metabolites biosynthesis, transport and catabolism	short chain dehydrogenase	Estradiol 17-beta-dehydrogenase 1 OS=Homo sapiens OX=9606 GN=HSD17B1 PE=1 SV=3	Q	Secondary metabolites biosynthesis, transport and catabolism	estradiol 17-beta-dehydrogenase 1 isoform 1 [Homo sapiens]	biological process: metabolic process (GO:0008152);; biological process: single-organism process (GO:0044699);; molecular function: catalytic activity (GO:0003824);; cellular component: cell (GO:0005623);; cellular component: cell part (GO:0044464);; biological process: cellular process (GO:0009987);; biological process: biological regulation (GO:0065007);; biological process: multicellular organ…
ENSG00000120913	PDLIM2	4.564325	325	5.902353	375	5.094427	397	2.858118	227	3.588123	243	3.668974	268	0.000872409	0.64759752	up	--	--	Molecular Function: metal ion binding (GO:0046872);;	K23353|2.9e-192|hsa:64236|K23353 PDZ and LIM domain protein 1/2/3/4 | (RefSeq) PDLIM2, MYSTIQUE, SLIM; PDZ and LIM domain 2	--	[TZ]	Signal transduction mechanisms;; Cytoskeleton	PDZ domain	PDZ and LIM domain protein 2 OS=Homo sapiens OX=9606 GN=PDLIM2 PE=1 SV=1	--	--	PDZ and LIM domain protein 2 isoform 1 [Homo sapiens]	molecular function: binding (GO:0005488)
ENSG00000204385	SLC44A4	8.240972	716	4.694292	369	5.170854	488	3.337522	324	3.737553	326	4.220295	376	0.003526936	0.646313474	up	--	--	Cellular Component: integral component of membrane (GO:0016021);; Molecular Function: thiamine pyrophosphate transporter activity (GO:0090422);;	K15377|0.0e+00|hsa:80736|K15377 solute carrier family 44 (choline transporter-like protein), member 2/4/5 | (RefSeq) SLC44A4, C6orf29, CTL4, DFNA72, NG22, TPPT, hTPPT1; solute carrier family 44 member 4	Choline metabolism in cancer (ko05231)	[I]	Lipid transport and metabolism	Plasma-membrane choline transporter	Choline transporter-like protein 4 OS=Homo sapiens OX=9606 GN=SLC44A4 PE=1 SV=2	P	Inorganic ion transport and metabolism	choline transporter-like protein 4 isoform 3 [Homo sapiens]	cellular component: membrane (GO:0016020);; cellular component: membrane part (GO:0044425);; biological process: single-organism process (GO:0044699);; biological process: response to stimulus (GO:0050896);; biological process: localization (GO:0051179);; molecular function: transporter activity (GO:0005215)
ENSG00000132821	VSTM2L	1.140132	84	1.057784	69	0.997449	80	0.578219	47	0.251097	19	0.754776	57	0.027299775	0.644926116	up	--	--	Cellular Component: cellular_component (GO:0005575);; Cellular Component: extracellular region (GO:0005576);; Cellular Component: intracellular (GO:0005622);; Cellular Component: cell (GO:0005623);; Cellular Component: cytoplasm (GO:0005737);; Biological Process: biological_process (GO:0008150);; Biological Process: regulation of cell death (GO:0010941);; Biological Process: regulation of apoptot…	K03538|1.6e-11|tgu:100231396|K03538 ribonuclease P protein subunit POP4 [EC:3.1.26.5] | (RefSeq) POP4; ribonuclease P protein subunit p29 isoform X1	Ribosome biogenesis in eukaryotes (ko03008);; RNA transport (ko03013)	--	--	Immunoglobulin V-set domain	V-set and transmembrane domain-containing protein 2-like protein OS=Homo sapiens OX=9606 GN=VSTM2L PE=1 SV=1	T	Signal transduction mechanisms	V-set and transmembrane domain-containing protein 2-like protein precursor [Macaca mulatta]	cellular component: extracellular region (GO:0005576);; cellular component: cell (GO:0005623);; cellular component: cell part (GO:0044464);; biological process: biological regulation (GO:0065007)
ENSG00000067057	PFKP	87.174841	8516	124.908787	10895	97.664693	10491	59.639847	6388	61.685242	5970	80.555393	8122	0.000256211	0.644286701	up	[G]	Carbohydrate transport and metabolism	Molecular Function: 6-phosphofructokinase activity (GO:0003872);; Molecular Function: ATP binding (GO:0005524);; Cellular Component: cytoplasm (GO:0005737);; Biological Process: fructose 6-phosphate metabolic process (GO:0006002);;	K00850|0.0e+00|hsa:5214|K00850 6-phosphofructokinase 1 [EC:2.7.1.11] | (RefSeq) PFKP, ATP-PFK, PFK-C, PFK-P, PFKF; phosphofructokinase, platelet	Glycolysis / Gluconeogenesis (ko00010);; Pentose phosphate pathway (ko00030);; Fructose and mannose metabolism (ko00051);; Galactose metabolism (ko00052);; Carbon metabolism (ko01200);; Biosynthesis of amino acids (ko01230);; RNA degradation (ko03018);; HIF-1 signaling pathway (ko04066);; AMPK signaling pathway (ko04152);; Thyroid hormone signaling pathway (ko04919);; Glucagon signaling pathway (…	[G]	Carbohydrate transport and metabolism	Phosphofructokinase	ATP-dependent 6-phosphofructokinase, platelet type OS=Homo sapiens OX=9606 GN=PFKP PE=1 SV=2	F	Nucleotide transport and metabolism	ATP-dependent 6-phosphofructokinase, platelet type isoform 2 [Homo sapiens]	biological process: metabolic process (GO:0008152);; biological process: cellular process (GO:0009987);; molecular function: catalytic activity (GO:0003824);; molecular function: binding (GO:0005488);; cellular component: cell (GO:0005623);; cellular component: cell part (GO:0044464)
ENSG00000111669	TPI1	629.203695	28884	854.801212	34950	723.317896	36536	409.183906	20665	441.786125	20307	583.373561	27649	0.000205523	0.643907254	up	[G]	Carbohydrate transport and metabolism	Molecular Function: triose-phosphate isomerase activity (GO:0004807);; Biological Process: gluconeogenesis (GO:0006094);; Biological Process: glycolytic process (GO:0006096);;	K01803|1.1e-162|hsa:7167|K01803 triosephosphate isomerase (TIM) [EC:5.3.1.1] | (RefSeq) TPI1, HEL-S-49, TIM, TPI, TPID; triosephosphate isomerase 1	Glycolysis / Gluconeogenesis (ko00010);; Fructose and mannose metabolism (ko00051);; Inositol phosphate metabolism (ko00562);; Carbon metabolism (ko01200);; Biosynthesis of amino acids (ko01230)	[G]	Carbohydrate transport and metabolism	Triosephosphate isomerase	Triosephosphate isomerase OS=Homo sapiens OX=9606 GN=TPI1 PE=1 SV=4	G	Carbohydrate transport and metabolism	triosephosphate isomerase isoform 2 [Homo sapiens]	molecular function: catalytic activity (GO:0003824);; biological process: metabolic process (GO:0008152);; biological process: single-organism process (GO:0044699);; biological process: cellular process (GO:0009987)
ENSG00000204516	MICB	0.414695	39	0.855205	70	0.463658	47	0.346904	35	0.31091	29	0.134871	13	0.030606509	0.643086303	up	--	--	Cellular Component: integral component of membrane (GO:0016021);;	K07985|3.2e-226|hsa:4277|K07985 MHC class I-related protein | (RefSeq) MICB, PERB11.2; MHC class I polypeptide-related sequence B	Natural killer cell mediated cytotoxicity (ko04650);; Kaposi sarcoma-associated herpesvirus infection (ko05167)	--	--	Class I Histocompatibility antigen, domains alpha 1 and 2	MHC class I polypeptide-related sequence B OS=Homo sapiens OX=9606 GN=MICB PE=1 SV=2	S	Function unknown	MHC class I polypeptide-related sequence B isoform 1 precursor [Homo sapiens]	cellular component: membrane (GO:0016020);; cellular component: membrane part (GO:0044425)
ENSG00000272047	GTF2H5	1.565215	420	1.257563	305	1.610858	416	1.024959	293	1.180396	261	0.783022	225	0.000412787	0.64305565	up	--	--	Molecular Function: rDNA binding (GO:0000182);; Cellular Component: DNA-directed RNA polymerase complex (GO:0000428);; Cellular Component: core TFIIH complex (GO:0000439);; Molecular Function: molecular_function (GO:0003674);; Molecular Function: nucleic acid binding (GO:0003676);; Molecular Function: DNA binding (GO:0003677);; Molecular Function: double-stranded DNA binding (GO:0003690);; Molecu…	K10845|3.8e-32|aju:106982684|K10845 TFIIH basal transcription factor complex TTD-A subunit | (RefSeq) GTF2H5; general transcription factor IIH subunit 5	Basal transcription factors (ko03022);; Nucleotide excision repair (ko03420)	[S]	Function unknown	Transcription factor TFIIH complex subunit Tfb5	General transcription factor IIH subunit 5 OS=Homo sapiens OX=9606 GN=GTF2H5 PE=1 SV=1	K	Transcription	general transcription factor IIH subunit 5 [Otolemur garnettii]	molecular function: binding (GO:0005488);; cellular component: cell (GO:0005623);; cellular component: macromolecular complex (GO:0032991);; cellular component: cell part (GO:0044464);; cellular component: organelle (GO:0043226);; cellular component: organelle part (GO:0044422);; cellular component: membrane-enclosed lumen (GO:0031974);; biological process: metabolic process (GO:0008152);; biolog…
ENSG00000128709	HOXD9	1.907833	133	1.155262	72	1.336899	103	0.495294	38	0.901134	63	0.994281	72	0.022676921	0.642818396	up	--	--	Biological Process: reproduction (GO:0000003);; Biological Process: negative regulation of transcription from RNA polymerase II promoter (GO:0000122);; Molecular Function: transcription regulatory region sequence-specific DNA binding (GO:0000976);; Molecular Function: RNA polymerase II regulatory region sequence-specific DNA binding (GO:0000977);; Molecular Function: RNA polymerase II transcripti…	K09294|7.6e-166|hsa:3235|K09294 homeobox protein HoxB/C/D9 | (RefSeq) HOXD9, HOX4, HOX4C, Hox-4.3, Hox-5.2; homeobox D9	--	[K]	Transcription	Hox9 activation region	Homeobox protein Hox-D9 OS=Homo sapiens OX=9606 GN=HOXD9 PE=1 SV=5	K	Transcription	homeobox protein Hox-D9 [Homo sapiens]	biological process: reproduction (GO:0000003);; biological process: biological regulation (GO:0065007);; molecular function: binding (GO:0005488);; molecular function: nucleic acid binding transcription factor activity (GO:0001071);; biological process: multicellular organismal process (GO:0032501);; biological process: developmental process (GO:0032502);; biological process: single-organism proc…
ENSG00000196544	BORCS6	5.97245	571	8.288363	706	8.155825	858	4.712988	495	4.590018	437	5.285584	522	0.000385788	0.642635103	up	--	--	Cellular Component: cellular_component (GO:0005575);; Cellular Component: intracellular (GO:0005622);; Cellular Component: cell (GO:0005623);; Cellular Component: cytoplasm (GO:0005737);; Cellular Component: cytosol (GO:0005829);; Biological Process: biological_process (GO:0008150);; Biological Process: lysosome localization (GO:0032418);; Cellular Component: macromolecular complex (GO:0032991);;…	K20820|1.4e-167|hsa:54785|K20820 BLOC-1 related complex subunit 6 | (RefSeq) BORCS6, C17orf59, PRO2472; BLOC-1 related complex subunit 6	--	[S]	Function unknown	BLOC-1-related complex sub-unit 6	BLOC-1-related complex subunit 6 OS=Homo sapiens OX=9606 GN=BORCS6 PE=1 SV=2	S	Function unknown	BLOC-1-related complex subunit 6 [Homo sapiens]	cellular component: cell (GO:0005623);; cellular component: cell part (GO:0044464);; biological process: localization (GO:0051179);; cellular component: macromolecular complex (GO:0032991)
ENSG00000164039	BDH2	25.585422	1052	29.077095	1048	30.787553	1377	18.70189	815	20.316897	835	18.747135	778	5.30E-06	0.639287033	up	[IQR]	Lipid transport and metabolism;; Secondary metabolites biosynthesis, transport and catabolism;; General function prediction only	Molecular Function: nucleotide binding (GO:0000166);; Molecular Function: molecular_function (GO:0003674);; Molecular Function: catalytic activity (GO:0003824);; Molecular Function: 3-hydroxybutyrate dehydrogenase activity (GO:0003858);; Molecular Function: binding (GO:0005488);; Cellular Component: cellular_component (GO:0005575);; Cellular Component: intracellular (GO:0005622);; Cellular Compon…	K00019|7.7e-133|hsa:56898|K00019 3-hydroxybutyrate dehydrogenase [EC:1.1.1.30] | (RefSeq) BDH2, DHRS6, EFA6R, PRO20933, SDR15C1, UCPA-OR, UNQ6308; 3-hydroxybutyrate dehydrogenase 2	Synthesis and degradation of ketone bodies (ko00072);; Butanoate metabolism (ko00650)	[R]	General function prediction only	Enoyl-(Acyl carrier protein) reductase	3-hydroxybutyrate dehydrogenase type 2 OS=Homo sapiens OX=9606 GN=BDH2 PE=1 SV=2	Q	Secondary metabolites biosynthesis, transport and catabolism	3-hydroxybutyrate dehydrogenase type 2 [Homo sapiens]	molecular function: binding (GO:0005488);; molecular function: catalytic activity (GO:0003824);; biological process: metabolic process (GO:0008152);; biological process: single-organism process (GO:0044699);; cellular component: cell (GO:0005623);; cellular component: cell part (GO:0044464);; biological process: cellular process (GO:0009987);; biological process: developmental process (GO:0032502…
ENSG00000128228	SDF2L1	36.815468	1182	41.711754	1194	37.28318	1318	25.533302	901	23.415583	749	28.022583	929	2.17E-05	0.639247493	up	--	--	Cellular Component: cytoplasm (GO:0005737);; Biological Process: cytoskeleton organization (GO:0007010);; Biological Process: axon guidance (GO:0007411);; Biological Process: brain development (GO:0007420);; Molecular Function: microtubule binding (GO:0008017);; Cellular Component: membrane (GO:0016020);; Molecular Function: hydrolase activity, acting on carbon-nitrogen (but not peptide) bonds (G…	K00728|1.7e-14|pmac:106716116|K00728 dolichyl-phosphate-mannose-protein mannosyltransferase [EC:2.4.1.109] | (RefSeq) LOW QUALITY PROTEIN: protein O-mannosyl-transferase 2	Other types of O-glycan biosynthesis (ko00514);; Mannose type O-glycan biosynthesis (ko00515)	[R]	General function prediction only	MIR domain	Stromal cell-derived factor 2-like protein 1 OS=Homo sapiens OX=9606 GN=SDF2L1 PE=1 SV=2	O	Posttranslational modification, protein turnover, chaperones	stromal cell-derived factor 2-like protein 1 precursor [Homo sapiens]	cellular component: cell (GO:0005623);; cellular component: cell part (GO:0044464);; biological process: cellular process (GO:0009987);; biological process: cellular component organization or biogenesis (GO:0071840);; biological process: multicellular organismal process (GO:0032501);; biological process: developmental process (GO:0032502);; biological process: locomotion (GO:0040011);; biological…
ENSG00000239779	WBP1	84.271088	3930	96.615276	4004	103.923548	5336	59.600894	3049	59.852902	2871	68.715995	3316	6.73E-06	0.63866666	up	--	--	Cellular Component: integral component of membrane (GO:0016021);;	K22154|1.4e-27|acs:103282658|K22154 dapper | (RefSeq) dact3; dishevelled binding antagonist of beta catenin 3	--	--	--	WW domain-binding protein 1	WW domain-binding protein 1 OS=Homo sapiens OX=9606 GN=WBP1 PE=1 SV=1	S	Function unknown	hCG2039828, isoform CRA_g [Homo sapiens]	cellular component: membrane (GO:0016020);; cellular component: membrane part (GO:0044425)
ENSG00000146232	NFKBIE	6.627769	636	7.545881	646	7.990585	840	4.365606	460	4.256604	408	5.736017	569	0.000599697	0.638614457	up	[T]	Signal transduction mechanisms	Cellular Component: fibrillar center (GO:0001650);; Cellular Component: nucleoplasm (GO:0005654);; Cellular Component: Golgi apparatus (GO:0005794);; Cellular Component: cytosol (GO:0005829);; Biological Process: D-serine transport (GO:0042942);; Cellular Component: perinuclear region of cytoplasm (GO:0048471);;	K05872|6.3e-259|hsa:4794|K05872 NF-kappa-B inhibitor epsilon | (RefSeq) NFKBIE, IKBE; NFKB inhibitor epsilon	Th1 and Th2 cell differentiation (ko04658);; Th17 cell differentiation (ko04659);; T cell receptor signaling pathway (ko04660);; B cell receptor signaling pathway (ko04662);; Neurotrophin signaling pathway (ko04722);; Adipocytokine signaling pathway (ko04920);; Epstein-Barr virus infection (ko05169);; PD-L1 expression and PD-1 checkpoint pathway in cancer (ko05235)	[R]	General function prediction only	Ankyrin repeats (3 copies)	NF-kappa-B inhibitor epsilon OS=Homo sapiens OX=9606 GN=NFKBIE PE=1 SV=3	K	Transcription	RecName: Full=NF-kappa-B inhibitor epsilon; Short=NF-kappa-BIE; AltName: Full=I-kappa-B-epsilon; Short=IkB-E; Short=IkB-epsilon; Short=IkappaBepsilon [Homo sapiens]	cellular component: cell (GO:0005623);; cellular component: membrane-enclosed lumen (GO:0031974);; cellular component: organelle (GO:0043226);; cellular component: organelle part (GO:0044422);; cellular component: cell part (GO:0044464);; biological process: single-organism process (GO:0044699);; biological process: localization (GO:0051179)
ENSG00000175183	CSRP2	2.529373	85	1.796651	57	3.355075	128	1.582313	61	1.549021	54	1.210353	42	0.020842359	0.638594216	up	--	--	Molecular Function: metal ion binding (GO:0046872);;	K09377|5.5e-118|aju:106967397|K09377 cysteine and glycine-rich protein | (RefSeq) CSRP2; cysteine and glycine-rich protein 2	--	[TZ]	Signal transduction mechanisms;; Cytoskeleton	LIM domain	Cysteine and glycine-rich protein 2 OS=Homo sapiens OX=9606 GN=CSRP2 PE=1 SV=3	--	--	cysteine and glycine-rich protein 2 [Carlito syrichta]	molecular function: binding (GO:0005488)
ENSG00000187730	GABRD	0.945519	64	1.806426	111	0.851931	65	0.624798	45	0.273929	20	0.809858	58	0.031002703	0.638439115	up	--	--	Molecular Function: GABA-A receptor activity (GO:0004890);; Molecular Function: extracellular ligand-gated ion channel activity (GO:0005230);; Cellular Component: plasma membrane (GO:0005886);; Cellular Component: integral component of membrane (GO:0016021);;	K05184|3.8e-255|hsa:2563|K05184 gamma-aminobutyric acid receptor subunit delta | (RefSeq) GABRD, EIG10, EJM7, GEFSP5; gamma-aminobutyric acid type A receptor subunit delta	Neuroactive ligand-receptor interaction (ko04080);; Retrograde endocannabinoid signaling (ko04723);; GABAergic synapse (ko04727);; Morphine addiction (ko05032);; Nicotine addiction (ko05033)	[T]	Signal transduction mechanisms	Neurotransmitter-gated ion-channel ligand binding domain	Gamma-aminobutyric acid receptor subunit delta OS=Homo sapiens OX=9606 GN=GABRD PE=1 SV=2	T	Signal transduction mechanisms	gamma-aminobutyric acid receptor subunit delta precursor [Homo sapiens]	biological process: cellular process (GO:0009987);; biological process: signaling (GO:0023052);; biological process: single-organism process (GO:0044699);; biological process: response to stimulus (GO:0050896);; biological process: biological regulation (GO:0065007);; molecular function: signal transducer activity (GO:0004871);; molecular function: molecular transducer activity (GO:0060089);; bio…
ENSG00000186480	INSIG1	119.21586	12493	117.307418	10736	102.564901	11907	74.829871	8619	84.039905	8534	74.123125	7849	1.66E-08	0.636955933	up	--	--	Cellular Component: endoplasmic reticulum membrane (GO:0005789);; Biological Process: triglyceride metabolic process (GO:0006641);; Biological Process: cholesterol biosynthetic process (GO:0006695);; Biological Process: response to sterol depletion (GO:0006991);; Biological Process: negative regulation of steroid biosynthetic process (GO:0010894);; Cellular Component: integral component of membra…	--	--	[T]	Signal transduction mechanisms	Insulin-induced protein (INSIG)	Insulin-induced gene 1 protein OS=Homo sapiens OX=9606 GN=INSIG1 PE=1 SV=3	T	Signal transduction mechanisms	insulin-induced gene 1 protein isoform 1 [Homo sapiens]	cellular component: cell (GO:0005623);; cellular component: membrane (GO:0016020);; cellular component: organelle (GO:0043226);; cellular component: organelle part (GO:0044422);; cellular component: membrane part (GO:0044425);; cellular component: cell part (GO:0044464);; biological process: metabolic process (GO:0008152);; biological process: cellular process (GO:0009987);; biological process: s…
ENSG00000169403	PTAFR	0.597008	76	0.845006	112	0.652051	93	0.265367	49	0.539483	69	0.294679	51	0.019837939	0.63641339	up	--	--	Molecular Function: platelet activating factor receptor activity (GO:0004992);; Biological Process: chemotaxis (GO:0006935);; Cellular Component: integral component of membrane (GO:0016021);;	K04279|3.7e-194|hsa:5724|K04279 platelet-activating factor receptor | (RefSeq) PTAFR, PAFR; platelet activating factor receptor	Calcium signaling pathway (ko04020);; Neuroactive ligand-receptor interaction (ko04080);; Staphylococcus aureus infection (ko05150)	--	--	7 transmembrane receptor (rhodopsin family)	Platelet-activating factor receptor OS=Homo sapiens OX=9606 GN=PTAFR PE=1 SV=1	T	Signal transduction mechanisms	platelet-activating factor receptor [Homo sapiens]	biological process: cellular process (GO:0009987);; biological process: signaling (GO:0023052);; biological process: single-organism process (GO:0044699);; biological process: response to stimulus (GO:0050896);; biological process: biological regulation (GO:0065007);; molecular function: signal transducer activity (GO:0004871);; molecular function: molecular transducer activity (GO:0060089);; bio…
ENSG00000256060	TRAPPC2B	12.91563	353	15.989432	389	14.910518	458	8.689429	266	10.188577	277	9.883159	280	0.000415869	0.635712572	up	--	--	Cellular Component: nucleoplasm (GO:0005654);; Cellular Component: endoplasmic reticulum (GO:0005783);; Biological Process: ER to Golgi vesicle-mediated transport (GO:0006888);; Cellular Component: intracellular membrane-bounded organelle (GO:0043231);;	K20301|5.3e-78|csab:103231619|K20301 trafficking protein particle complex subunit 2 | (RefSeq) TRAPPC2; trafficking protein particle complex 2	--	[U]	Intracellular trafficking, secretion, and vesicular transport	Sedlin, N-terminal conserved region	Trafficking protein particle complex subunit 2 OS=Homo sapiens OX=9606 GN=TRAPPC2 PE=1 SV=1	U	Intracellular trafficking, secretion, and vesicular transport	trafficking protein particle complex subunit 2 isoform X2 [Rhinopithecus roxellana]	cellular component: cell (GO:0005623);; cellular component: organelle (GO:0043226);; cellular component: organelle part (GO:0044422);; cellular component: cell part (GO:0044464);; biological process: localization (GO:0051179)
ENSG00000272414	FAM47E-STBD1	3.243287	342	12.975139	1297	5.027825	512	2.969	294	3.996472	396	1.4739	139	0.030446949	0.631923089	up	--	--	Cellular Component: cellular_component (GO:0005575);; Cellular Component: intracellular (GO:0005622);; Cellular Component: cell (GO:0005623);; Cellular Component: cytoplasm (GO:0005737);; Cellular Component: intracellular part (GO:0044424);; Cellular Component: cell part (GO:0044464);;	K22267|2.1e-22|aam:106491811|K22267 starch-binding domain-containing protein 1 | (RefSeq) uncharacterized LOC106491811	--	--	--	FAM47 family	Protein FAM47E OS=Homo sapiens OX=9606 GN=FAM47E PE=2 SV=3	S	Function unknown	uncharacterized protein LOC100631383 [Homo sapiens]	cellular component: cell (GO:0005623);; cellular component: cell part (GO:0044464)
ENSG00000162433	AK4	1.232983	315	1.952555	443	1.225636	344	0.891903	251	1.016823	258	0.911679	240	0.002852536	0.631702204	up	[F]	Nucleotide transport and metabolism	Molecular Function: adenylate kinase activity (GO:0004017);; Molecular Function: nucleoside diphosphate kinase activity (GO:0004550);; Molecular Function: ATP binding (GO:0005524);; Molecular Function: GTP binding (GO:0005525);; Cellular Component: mitochondrial matrix (GO:0005759);; Biological Process: ADP biosynthetic process (GO:0006172);; Biological Process: AMP metabolic process (GO:0046033)…	K00939|7.5e-127|hsa:205|K00939 adenylate kinase [EC:2.7.4.3] | (RefSeq) AK4, AK_4, AK3, AK3L1, AK3L2; adenylate kinase 4	Purine metabolism (ko00230);; Thiamine metabolism (ko00730)	[F]	Nucleotide transport and metabolism	Adenylate kinase	Adenylate kinase 4, mitochondrial OS=Homo sapiens OX=9606 GN=AK4 PE=1 SV=1	F	Nucleotide transport and metabolism	adenylate kinase 4, mitochondrial isoform a [Homo sapiens]	biological process: metabolic process (GO:0008152);; biological process: cellular process (GO:0009987);; biological process: single-organism process (GO:0044699);; molecular function: catalytic activity (GO:0003824);; molecular function: binding (GO:0005488);; cellular component: cell (GO:0005623);; cellular component: membrane-enclosed lumen (GO:0031974);; cellular component: organelle (GO:00432…
ENSG00000113732	ATP6V0E1	106.43468	5444	113.392793	5070	126.226067	6908	72.896272	4034	82.210702	3972	81.37621	4257	8.33E-07	0.631222315	up	--	--	Molecular Function: hydrogen ion transmembrane transporter activity (GO:0015078);; Cellular Component: integral component of membrane (GO:0016021);; Cellular Component: proton-transporting V-type ATPase, V0 domain (GO:0033179);;	K02153|2.1e-42|cjc:100393000|K02153 V-type H+-transporting ATPase subunit e | (RefSeq) ATP6V0E1; ATPase H+ transporting V0 subunit e1	Oxidative phosphorylation (ko00190);; Phagosome (ko04145);; Synaptic vesicle cycle (ko04721);; Collecting duct acid secretion (ko04966);; Human papillomavirus infection (ko05165);; Rheumatoid arthritis (ko05323)	[C]	Energy production and conversion	ATP synthase subunit H	V-type proton ATPase subunit e 1 OS=Homo sapiens OX=9606 GN=ATP6V0E1 PE=1 SV=2	C	Energy production and conversion	V-type proton ATPase subunit e 1 [Pongo abelii]	biological process: localization (GO:0051179);; molecular function: transporter activity (GO:0005215);; cellular component: membrane (GO:0016020);; cellular component: membrane part (GO:0044425);; cellular component: macromolecular complex (GO:0032991)
ENSG00000189171	S100A13	57.784441	1437	72.97505	1520	68.284159	1875	37.191428	996	42.454929	1041	50.706637	1292	0.000198628	0.631066689	up	--	--	Molecular Function: copper ion binding (GO:0005507);; Molecular Function: calcium ion binding (GO:0005509);;	K21128|3.6e-09|mun:110566681|K21128 protein S100-A9 | (RefSeq) S100a9; protein S100-A9	IL-17 signaling pathway (ko04657)	--	--	S-100/ICaBP type calcium binding domain	Protein S100-A13 OS=Homo sapiens OX=9606 GN=S100A13 PE=1 SV=1	U	Intracellular trafficking, secretion, and vesicular transport	protein S100-A13 [Homo sapiens]	molecular function: binding (GO:0005488)
ENSG00000105088	OLFM2	30.156728	2246	33.422631	2220	31.81816	2620	17.365683	1419	19.715291	1459	25.926287	1987	0.000314096	0.630919407	up	--	--	Cellular Component: nucleoplasm (GO:0005654);;	K19721|3.5e-91|ccar:109084329|K19721 collagen type V/XI/XXIV/XXVII, alpha | (RefSeq) collagen alpha-1(XI) chain-like	--	[W]	Extracellular structures	Olfactomedin-like domain	Noelin-2 OS=Homo sapiens OX=9606 GN=OLFM2 PE=1 SV=2	W	Extracellular structures	noelin-2 isoform 2 precursor [Homo sapiens]	cellular component: cell (GO:0005623);; cellular component: organelle (GO:0043226);; cellular component: organelle part (GO:0044422);; cellular component: cell part (GO:0044464)
Homo_sapiens_newGene_10500	--	1.37266	74	1.427146	69	1.778517	105	0.610407	36	0.635152	34	1.198643	67	0.027685551	0.630853683	up	--	--	--	--	--	--	--	--	--	--	--	hCG2042492, partial [Homo sapiens]	--
ENSG00000232810	TNF	2.767526	173	1.623514	90	3.022349	207	0.739273	51	0.489483	31	2.210748	142	0.033669108	0.630698233	up	--	--	Biological Process: negative regulation of transcription from RNA polymerase II promoter (GO:0000122);; Biological Process: microglial cell activation (GO:0001774);; Cellular Component: phagocytic cup (GO:0001891);; Biological Process: negative regulation of endothelial cell proliferation (GO:0001937);; Molecular Function: protease binding (GO:0002020);; Biological Process: positive regulation of…	K03156|1.7e-129|hsa:7124|K03156 tumor necrosis factor superfamily, member 2 | (RefSeq) TNF, DIF, TNF-alpha, TNFA, TNFSF2, TNLG1F; tumor necrosis factor	Antifolate resistance (ko01523);; MAPK signaling pathway (ko04010);; Cytokine-cytokine receptor interaction (ko04060);; Viral protein interaction with cytokine and cytokine receptor (ko04061);; NF-kappa B signaling pathway (ko04064);; Sphingolipid signaling pathway (ko04071);; mTOR signaling pathway (ko04150);; Apoptosis (ko04210);; Necroptosis (ko04217);; TGF-beta signaling pathway (ko04350);; O…	--	--	TNF(Tumour Necrosis Factor) family	Tumor necrosis factor OS=Homo sapiens OX=9606 GN=TNF PE=1 SV=1	T	Signal transduction mechanisms	tumor necrosis factor [Homo sapiens]	biological process: biological regulation (GO:0065007);; biological process: immune system process (GO:0002376);; biological process: cellular process (GO:0009987);; biological process: single-organism process (GO:0044699);; cellular component: cell (GO:0005623);; cellular component: membrane (GO:0016020);; cellular component: membrane part (GO:0044425);; cellular component: cell part (GO:0044464…
ENSG00000179085	DPM3	14.876061	240	16.320062	228	12.45324	215	9.449577	171	7.136763	110	10.244316	171	0.006190379	0.630497335	up	--	--	Cellular Component: endoplasmic reticulum membrane (GO:0005789);; Biological Process: protein glycosylation (GO:0006486);; Cellular Component: integral component of membrane (GO:0016021);;	K09659|5.1e-45|hsa:54344|K09659 dolichol-phosphate mannosyltransferase subunit 3 | (RefSeq) DPM3, CDG1O; dolichyl-phosphate mannosyltransferase subunit 3, regulatory	N-Glycan biosynthesis (ko00510)	[OT]	Posttranslational modification, protein turnover, chaperones;; Signal transduction mechanisms	Dolichol-phosphate mannosyltransferase subunit 3 (DPM3)	Dolichol-phosphate mannosyltransferase subunit 3 OS=Homo sapiens OX=9606 GN=DPM3 PE=1 SV=2	--	--	unnamed protein product [Homo sapiens]	cellular component: cell (GO:0005623);; cellular component: membrane (GO:0016020);; cellular component: organelle (GO:0043226);; cellular component: organelle part (GO:0044422);; cellular component: membrane part (GO:0044425);; cellular component: cell part (GO:0044464);; biological process: metabolic process (GO:0008152);; biological process: cellular process (GO:0009987);; biological process: s…
Homo_sapiens_newGene_7217	--	0.640433	38	1.651228	70	0.858123	47	0.511877	32	0.558546	25	0.36777	26	0.032274846	0.6300389	up	--	--	--	--	--	--	--	--	--	--	--	--	--
ENSG00000180964	TCEAL8	9.989033	446	12.243437	488	11.187339	553	6.728187	331	8.442101	379	6.867375	322	0.000274775	0.629358715	up	--	--	Molecular Function: molecular_function (GO:0003674);; Molecular Function: binding (GO:0005488);; Molecular Function: protein binding (GO:0005515);; Cellular Component: cellular_component (GO:0005575);; Cellular Component: intracellular (GO:0005622);; Cellular Component: cell (GO:0005623);; Cellular Component: nucleus (GO:0005634);; Biological Process: regulation of transcription, DNA-templated (G…	--	--	--	--	Brain expressed X-linked like family	Transcription elongation factor A protein-like 8 OS=Homo sapiens OX=9606 GN=TCEAL8 PE=1 SV=1	K	Transcription	transcription elongation factor A protein-like 8 [Homo sapiens]	molecular function: binding (GO:0005488);; cellular component: cell (GO:0005623);; cellular component: cell part (GO:0044464);; cellular component: organelle (GO:0043226);; biological process: biological regulation (GO:0065007)
ENSG00000123240	OPTN	8.052023	952	4.850914	524	6.136413	823	4.636655	607	3.806616	466	4.042584	493	0.001254442	0.628981965	up	--	--	Cellular Component: Golgi apparatus (GO:0005794);; Biological Process: autophagy (GO:0006914);; Biological Process: vesicle-mediated transport (GO:0016192);; Cellular Component: cytoplasmic vesicle (GO:0031410);; Molecular Function: K63-linked polyubiquitin modification-dependent protein binding (GO:0070530);;	K19946|2.7e-306|hsa:10133|K19946 optineurin | (RefSeq) OPTN, ALS12, FIP2, GLC1E, HIP7, HYPL, NRP, TFIIIA-INTP; optineurin	Mitophagy - animal (ko04137);; Amyotrophic lateral sclerosis (ko05014)	--	--	Leucine zipper of domain CC2 of NEMO, NF-kappa-B essential modulator	Optineurin OS=Homo sapiens OX=9606 GN=OPTN PE=1 SV=3	U	Intracellular trafficking, secretion, and vesicular transport	optineurin [Homo sapiens]	cellular component: cell (GO:0005623);; cellular component: organelle (GO:0043226);; cellular component: cell part (GO:0044464);; biological process: metabolic process (GO:0008152);; biological process: cellular process (GO:0009987);; biological process: localization (GO:0051179);; molecular function: binding (GO:0005488)
ENSG00000143774	GUK1	457.238997	15095	553.01174	15911	528.097405	19220	310.279099	11059	310.931939	10252	402.302664	13662	6.08E-05	0.62881077	up	[F]	Nucleotide transport and metabolism	Molecular Function: guanylate kinase activity (GO:0004385);;	K00942|3.5e-104|hsa:2987|K00942 guanylate kinase [EC:2.7.4.8] | (RefSeq) GUK1, GMK; guanylate kinase 1	Purine metabolism (ko00230)	[F]	Nucleotide transport and metabolism	Guanylate kinase	Guanylate kinase OS=Homo sapiens OX=9606 GN=GUK1 PE=1 SV=2	F	Nucleotide transport and metabolism	guanylate kinase isoform X1 [Homo sapiens]	biological process: metabolic process (GO:0008152);; biological process: cellular process (GO:0009987);; biological process: single-organism process (GO:0044699);; molecular function: catalytic activity (GO:0003824)
ENSG00000176533	GNG7	0.917058	136	0.904554	118	0.787746	136	0.474484	82	0.571614	77	0.579548	94	0.008650788	0.62823384	up	--	--	Molecular Function: GTPase activity (GO:0003924);; Cellular Component: heterotrimeric G-protein complex (GO:0005834);; Biological Process: G-protein coupled receptor signaling pathway (GO:0007186);;	K04543|6.8e-31|csab:103233652|K04543 guanine nucleotide-binding protein G(I)/G(S)/G(O) subunit gamma-7 | (RefSeq) GNG7; G protein subunit gamma 7	Ras signaling pathway (ko04014);; Chemokine signaling pathway (ko04062);; PI3K-Akt signaling pathway (ko04151);; Apelin signaling pathway (ko04371);; Circadian entrainment (ko04713);; Retrograde endocannabinoid signaling (ko04723);; Glutamatergic synapse (ko04724);; Cholinergic synapse (ko04725);; Serotonergic synapse (ko04726);; GABAergic synapse (ko04727);; Dopaminergic synapse (ko04728);; Olfa…	[T]	Signal transduction mechanisms	GGL domain	Guanine nucleotide-binding protein G(I)/G(S)/G(O) subunit gamma-7 OS=Homo sapiens OX=9606 GN=GNG7 PE=1 SV=1	T	Signal transduction mechanisms	guanine nucleotide-binding protein G(I)/G(S)/G(O) subunit gamma-7 [Macaca mulatta]	molecular function: catalytic activity (GO:0003824);; cellular component: cell (GO:0005623);; cellular component: membrane (GO:0016020);; cellular component: macromolecular complex (GO:0032991);; cellular component: membrane part (GO:0044425);; cellular component: cell part (GO:0044464);; biological process: cellular process (GO:0009987);; biological process: signaling (GO:0023052);; biological p…
ENSG00000170296	GABARAP	181.195693	9876	199.977554	9703	200.627023	11935	113.121333	6668	124.404544	6680	157.395463	8590	5.66E-05	0.627851336	up	--	--	Biological Process: microtubule cytoskeleton organization (GO:0000226);; Cellular Component: lysosome (GO:0005764);; Cellular Component: smooth endoplasmic reticulum (GO:0005790);; Cellular Component: Golgi apparatus (GO:0005794);; Cellular Component: microtubule associated complex (GO:0005875);; Cellular Component: plasma membrane (GO:0005886);; Cellular Component: axoneme (GO:0005930);; Biologi…	K08341|2.4e-60|aju:106972484|K08341 GABA(A) receptor-associated protein | (RefSeq) GABARAP; gamma-aminobutyric acid receptor-associated protein	FoxO signaling pathway (ko04068);; Autophagy - other (ko04136);; Mitophagy - animal (ko04137);; Autophagy - animal (ko04140);; Apelin signaling pathway (ko04371);; NOD-like receptor signaling pathway (ko04621);; GABAergic synapse (ko04727);; Amyotrophic lateral sclerosis (ko05014);; Kaposi sarcoma-associated herpesvirus infection (ko05167)	[Z]	Cytoskeleton	Autophagy protein Atg8 ubiquitin like	Gamma-aminobutyric acid receptor-associated protein OS=Homo sapiens OX=9606 GN=GABARAP PE=1 SV=1	Z	Cytoskeleton	unnamed protein product [Homo sapiens]	biological process: cellular process (GO:0009987);; biological process: cellular component organization or biogenesis (GO:0071840);; cellular component: cell (GO:0005623);; cellular component: organelle (GO:0043226);; cellular component: cell part (GO:0044464);; cellular component: macromolecular complex (GO:0032991);; cellular component: organelle part (GO:0044422);; cellular component: membrane…
ENSG00000106266	SNX8	21.142642	3694	23.244057	3634	22.381572	4311	13.931769	2659	14.027693	2443	16.978968	3076	1.60E-05	0.627303105	up	--	--	Cellular Component: cytosol (GO:0005829);; Molecular Function: phosphatidylinositol binding (GO:0035091);; Biological Process: retrograde transport, endosome to Golgi (GO:0042147);;	K17922|1.4e-260|hsa:29886|K17922 sorting nexin-8 | (RefSeq) SNX8, Mvp1; sorting nexin 8	--	[U]	Intracellular trafficking, secretion, and vesicular transport	PX domain	Sorting nexin-8 OS=Homo sapiens OX=9606 GN=SNX8 PE=1 SV=1	U	Intracellular trafficking, secretion, and vesicular transport	sorting nexin-8 [Homo sapiens]	cellular component: cell (GO:0005623);; cellular component: cell part (GO:0044464);; molecular function: binding (GO:0005488);; biological process: localization (GO:0051179)
ENSG00000204272	NBDY	18.455647	997	16.878713	701	19.544292	1016	9.663872	581	13.866632	619	11.968122	672	0.000226264	0.627252815	up	--	--	--	--	--	--	--	--	Negative regulator of P-body association OS=Homo sapiens OX=9606 GN=NBDY PE=1 SV=1	--	--	negative regulator of P-body association [Homo sapiens]	--
ENSG00000165704	HPRT1	13.484744	704	17.315636	806	14.888788	856	10.447007	600	10.824794	563	9.447359	510	4.26E-05	0.626297691	up	[F]	Nucleotide transport and metabolism	Molecular Function: nucleotide binding (GO:0000166);; Biological Process: T cell mediated cytotoxicity (GO:0001913);; Biological Process: response to amphetamine (GO:0001975);; Molecular Function: hypoxanthine phosphoribosyltransferase activity (GO:0004422);; Cellular Component: cytosol (GO:0005829);; Biological Process: purine ribonucleoside salvage (GO:0006166);; Biological Process: adenine sal…	K00760|6.4e-123|ggo:101131143|K00760 hypoxanthine phosphoribosyltransferase [EC:2.4.2.8] | (RefSeq) HPRT1; hypoxanthine-guanine phosphoribosyltransferase	Purine metabolism (ko00230);; Drug metabolism - other enzymes (ko00983)	[F]	Nucleotide transport and metabolism	Phosphoribosyl transferase domain	Hypoxanthine-guanine phosphoribosyltransferase OS=Homo sapiens OX=9606 GN=HPRT1 PE=1 SV=2	F	Nucleotide transport and metabolism	hypoxanthine-guanine phosphoribosyltransferase [Homo sapiens]	molecular function: binding (GO:0005488);; biological process: cell killing (GO:0001906);; biological process: immune system process (GO:0002376);; biological process: single-organism process (GO:0044699);; biological process: response to stimulus (GO:0050896);; molecular function: catalytic activity (GO:0003824);; cellular component: cell (GO:0005623);; cellular component: cell part (GO:0044464)…
ENSG00000054148	PHPT1	90.261032	2990	117.504263	3472	104.335239	3804	69.124496	2516	60.786792	2005	78.43437	2680	8.72E-05	0.626006487	up	--	--	Cellular Component: cytosol (GO:0005829);; Biological Process: positive regulation of insulin secretion involved in cellular response to glucose stimulus (GO:0035774);; Biological Process: peptidyl-histidine dephosphorylation (GO:0035971);; Biological Process: negative regulation of lyase activity (GO:0051350);; Molecular Function: protein histidine phosphatase activity (GO:0101006);; Biological …	K01112|6.3e-67|pon:100174576|K01112 phosphohistidine phosphatase [EC:3.9.1.3] | (RefSeq) PHPT1; 14 kDa phosphohistidine phosphatase	--	--	--	Janus/Ocnus family (Ocnus)	14 kDa phosphohistidine phosphatase OS=Homo sapiens OX=9606 GN=PHPT1 PE=1 SV=1	O	Posttranslational modification, protein turnover, chaperones	14 kDa phosphohistidine phosphatase isoform 2 [Homo sapiens]	cellular component: cell (GO:0005623);; cellular component: cell part (GO:0044464);; biological process: biological regulation (GO:0065007);; biological process: metabolic process (GO:0008152);; biological process: cellular process (GO:0009987);; molecular function: catalytic activity (GO:0003824)
ENSG00000211450	SELENOH	88.432526	2871	101.568183	2937	106.594774	3814	63.465171	2170	58.217964	1861	81.159385	2631	0.0001882	0.625982873	up	--	--	--	--	--	--	--	Rdx family	Selenoprotein H OS=Homo sapiens OX=9606 GN=SELENOH PE=1 SV=2	S	Function unknown	selenoprotein H [Homo sapiens]	--
ENSG00000237330	RNF223	7.104305	502	8.844517	557	8.544672	664	4.669981	363	4.589667	323	6.58069	480	0.001917528	0.625139329	up	--	--	--	K22157|3.0e-15|oaa:107546885|K22157 E3 ubiquitin-protein ligase RNF183 [EC:2.3.2.31] | (RefSeq) RNF183; E3 ubiquitin-protein ligase RNF183	--	[O]	Posttranslational modification, protein turnover, chaperones	Ring finger domain	RING finger protein 223 OS=Homo sapiens OX=9606 GN=RNF223 PE=2 SV=1	O	Posttranslational modification, protein turnover, chaperones	RING finger protein 223 [Homo sapiens]	--
ENSG00000182712	CMC4	4.812139	198	5.872777	215	4.719855	214	2.735041	121	2.678041	110	4.189303	176	0.009425691	0.624452796	up	--	--	Cellular Component: cellular_component (GO:0005575);; Cellular Component: intracellular (GO:0005622);; Cellular Component: cell (GO:0005623);; Cellular Component: cytoplasm (GO:0005737);; Cellular Component: mitochondrion (GO:0005739);; Cellular Component: mitochondrial envelope (GO:0005740);; Cellular Component: mitochondrial intermembrane space (GO:0005758);; Biological Process: biological_proc…	--	--	--	--	Mature-T-Cell Proliferation I type	Cx9C motif-containing protein 4 OS=Homo sapiens OX=9606 GN=CMC4 PE=1 SV=1	S	Function unknown	cx9C motif-containing protein 4 [Homo sapiens]	cellular component: cell (GO:0005623);; cellular component: cell part (GO:0044464);; cellular component: organelle (GO:0043226);; cellular component: organelle part (GO:0044422);; cellular component: membrane-enclosed lumen (GO:0031974);; biological process: single-organism process (GO:0044699)
ENSG00000188243	COMMD6	18.77972	779	18.814756	643	14.783316	968	11.392409	588	7.517339	430	12.829205	620	0.000704332	0.624375863	up	--	--	Molecular Function: molecular_function (GO:0003674);; Molecular Function: binding (GO:0005488);; Molecular Function: protein binding (GO:0005515);; Biological Process: regulation of transcription, DNA-templated (GO:0006355);; Molecular Function: transcription factor binding (GO:0008134);; Biological Process: biological_process (GO:0008150);; Biological Process: regulation of biosynthetic process …	K22562|3.7e-42|hsa:170622|K22562 COMM domain containing 6 | (RefSeq) COMMD6, Acrg; COMM domain containing 6	--	--	--	COMM domain	COMM domain-containing protein 6 OS=Homo sapiens OX=9606 GN=COMMD6 PE=1 SV=1	K	Transcription	COMM domain-containing protein 6 isoform b [Homo sapiens]	molecular function: binding (GO:0005488);; biological process: biological regulation (GO:0065007)
ENSG00000144741	SLC25A26	10.432074	764	9.679659	721	10.468022	853	5.598731	506	6.620976	523	7.027628	603	0.000129975	0.62359743	up	--	--	Cellular Component: integral component of membrane (GO:0016021);;	K15111|5.2e-36|csab:103227858|K15111 solute carrier family 25 (mitochondrial S-adenosylmethionine transporter), member 26 | (RefSeq) SLC25A26; solute carrier family 25 member 26	--	[C]	Energy production and conversion	Mitochondrial carrier protein	S-adenosylmethionine mitochondrial carrier protein OS=Homo sapiens OX=9606 GN=SLC25A26 PE=1 SV=2	C	Energy production and conversion	SLC25A26 isoform 1 [Pan troglodytes]	cellular component: membrane (GO:0016020);; cellular component: membrane part (GO:0044425)
ENSG00000171314	PGAM1	141.452332	9603	188.097305	11383	165.95694	12404	98.243507	7330	116.159561	7857	120.085968	8421	2.91E-05	0.620196204	up	[G]	Carbohydrate transport and metabolism	Molecular Function: bisphosphoglycerate mutase activity (GO:0004082);; Molecular Function: phosphoglycerate mutase activity (GO:0004619);; Biological Process: glycolytic process (GO:0006096);;	K01834|2.2e-146|bacu:103007307|K01834 2,3-bisphosphoglycerate-dependent phosphoglycerate mutase [EC:5.4.2.11] | (RefSeq) PGAM1; phosphoglycerate mutase 1	Glycolysis / Gluconeogenesis (ko00010);; Glycine, serine and threonine metabolism (ko00260);; Carbon metabolism (ko01200);; Biosynthesis of amino acids (ko01230);; Glucagon signaling pathway (ko04922);; Central carbon metabolism in cancer (ko05230)	[G]	Carbohydrate transport and metabolism	Histidine phosphatase superfamily (branch 1)	Phosphoglycerate mutase 1 OS=Homo sapiens OX=9606 GN=PGAM1 PE=1 SV=2	G	Carbohydrate transport and metabolism	PREDICTED: phosphoglycerate mutase 1 [Cebus capucinus imitator]	molecular function: catalytic activity (GO:0003824);; biological process: metabolic process (GO:0008152);; biological process: cellular process (GO:0009987);; biological process: single-organism process (GO:0044699)
ENSG00000144647	POMGNT2	5.211868	492	4.469329	376	4.774824	496	3.351923	348	3.056908	288	3.244958	317	0.000285724	0.620156468	up	--	--	Biological Process: neuron migration (GO:0001764);; Molecular Function: transferase activity, transferring glycosyl groups (GO:0016757);; Biological Process: protein O-linked mannosylation (GO:0035269);;	K18207|0.0e+00|hsa:84892|K18207 protein O-mannose beta-1,4-N-acetylglucosaminyltransferase [EC:2.4.1.312] | (RefSeq) POMGNT2, AGO61, C3orf39, GTDC2, MDDGA8, MDDGC8; protein O-linked mannose N-acetylglucosaminyltransferase 2 (beta 1,4-)	Mannose type O-glycan biosynthesis (ko00515)	[S]	Function unknown	Protein of unknown function (DUF563)	Protein O-linked-mannose beta-1,4-N-acetylglucosaminyltransferase 2 OS=Homo sapiens OX=9606 GN=POMGNT2 PE=1 SV=1	O	Posttranslational modification, protein turnover, chaperones	protein O-linked-mannose beta-1,4-N-acetylglucosaminyltransferase 2 precursor [Homo sapiens]	biological process: cellular process (GO:0009987);; biological process: locomotion (GO:0040011);; biological process: single-organism process (GO:0044699);; biological process: localization (GO:0051179);; molecular function: catalytic activity (GO:0003824);; biological process: metabolic process (GO:0008152)
ENSG00000139410	SDSL	29.278601	1522	29.955292	1377	30.985175	1787	19.066871	1088	18.087992	917	24.578387	1267	0.000155387	0.619571904	up	[E]	Amino acid transport and metabolism	Biological Process: cellular amino acid metabolic process (GO:0006520);; Molecular Function: pyridoxal phosphate binding (GO:0030170);;	K17989|2.1e-186|hsa:113675|K17989 L-serine/L-threonine ammonia-lyase [EC:4.3.1.17 4.3.1.19] | (RefSeq) SDSL, SDH_2, SDS-RS1, TDH, cSDH; serine dehydratase like	Glycine, serine and threonine metabolism (ko00260);; Cysteine and methionine metabolism (ko00270);; Valine, leucine and isoleucine biosynthesis (ko00290);; Carbon metabolism (ko01200);; Biosynthesis of amino acids (ko01230)	[E]	Amino acid transport and metabolism	Pyridoxal-phosphate dependent enzyme	Serine dehydratase-like OS=Homo sapiens OX=9606 GN=SDSL PE=1 SV=1	E	Amino acid transport and metabolism	serine dehydratase-like [Homo sapiens]	biological process: metabolic process (GO:0008152);; biological process: cellular process (GO:0009987);; biological process: single-organism process (GO:0044699);; molecular function: binding (GO:0005488)
ENSG00000137699	TRIM29	2.085493	251	2.118479	200	1.907579	242	1.245615	164	1.61776	125	1.472054	177	0.004383646	0.619564026	up	--	--	Biological Process: negative regulation of transcription from RNA polymerase II promoter (GO:0000122);; Molecular Function: p53 binding (GO:0002039);; Cellular Component: cytoplasm (GO:0005737);; Molecular Function: zinc ion binding (GO:0008270);; Biological Process: negative regulation of protein localization to nucleus (GO:1900181);;	K12010|3.2e-302|hsa:23650|K12010 tripartite motif-containing protein 29 | (RefSeq) TRIM29, ATDC; tripartite motif containing 29	--	--	--	B-box zinc finger	Tripartite motif-containing protein 29 OS=Homo sapiens OX=9606 GN=TRIM29 PE=1 SV=2	K	Transcription	tripartite motif-containing protein 29 isoform 1 [Homo sapiens]	biological process: biological regulation (GO:0065007);; molecular function: binding (GO:0005488);; cellular component: cell (GO:0005623);; cellular component: cell part (GO:0044464)
ENSG00000213859	KCTD11	5.498466	571	5.585835	517	5.22673	597	3.101048	354	3.657894	377	4.077856	439	0.000460608	0.619514299	up	--	--	Biological Process: protein homooligomerization (GO:0051260);;	K21920|2.3e-134|ggo:101151298|K21920 BTB/POZ domain-containing protein KCTD11 [EC:2.3.2.27] | (RefSeq) KCTD11; BTB/POZ domain-containing protein KCTD11	--	[R]	General function prediction only	BTB/POZ domain	BTB/POZ domain-containing protein KCTD11 OS=Homo sapiens OX=9606 GN=KCTD11 PE=1 SV=1	S	Function unknown	BTB/POZ domain-containing protein KCTD11 s [Homo sapiens]	biological process: cellular process (GO:0009987);; biological process: cellular component organization or biogenesis (GO:0071840)
Homo_sapiens_newGene_8449	--	2.308883	236	2.600515	249	2.43301	284	1.379338	154	1.265621	128	2.048556	221	0.008620913	0.61939105	up	--	--	--	--	--	--	--	--	--	--	--	--	--
ENSG00000131771	PPP1R1B	61.969679	3404	88.15795	4348	72.5047	4419	39.438751	2403	46.881047	2589	59.571461	3414	0.000870433	0.619119365	up	--	--	Biological Process: response to amphetamine (GO:0001975);; Molecular Function: protein phosphatase inhibitor activity (GO:0004864);; Cellular Component: nucleus (GO:0005634);; Cellular Component: cytoplasm (GO:0005737);; Biological Process: transcription, DNA-templated (GO:0006351);; Biological Process: memory (GO:0007613);; Biological Process: negative regulation of female receptivity (GO:000762…	K15494|1.9e-97|ggo:101139296|K15494 protein phosphatase 1 regulatory subunit 1B | (RefSeq) PPP1R1B; protein phosphatase 1 regulatory subunit 1B	cAMP signaling pathway (ko04024);; Dopaminergic synapse (ko04728);; Cocaine addiction (ko05030);; Amphetamine addiction (ko05031);; Alcoholism (ko05034)	--	--	Protein phosphatase inhibitor 1/DARPP-32	Protein phosphatase 1 regulatory subunit 1B OS=Homo sapiens OX=9606 GN=PPP1R1B PE=1 SV=2	K	Transcription	protein phosphatase 1 regulatory subunit 1B isoform 1 [Homo sapiens]	biological process: response to stimulus (GO:0050896);; biological process: biological regulation (GO:0065007);; molecular function: molecular function regulator (GO:0098772);; cellular component: cell (GO:0005623);; cellular component: organelle (GO:0043226);; cellular component: cell part (GO:0044464);; biological process: metabolic process (GO:0008152);; biological process: cellular process (G…
ENSG00000019582	CD74	1.210361	66	0.779546	38	0.658913	40	0.658466	39	0.200299	11	0.360633	18	0.038008488	0.617780061	up	--	--	Biological Process: intracellular protein transport (GO:0006886);; Biological Process: immune response (GO:0006955);; Cellular Component: integral component of membrane (GO:0016021);; Biological Process: antigen processing and presentation (GO:0019882);; Molecular Function: MHC class II protein binding (GO:0042289);;	--	--	--	--	--	--	--	--	CD74 isoform 8 [Pan troglodytes]	biological process: localization (GO:0051179);; biological process: immune system process (GO:0002376);; biological process: response to stimulus (GO:0050896);; cellular component: membrane (GO:0016020);; cellular component: membrane part (GO:0044425);; molecular function: binding (GO:0005488)
ENSG00000147383	NSDHL	45.632696	2961	44.771474	2645	47.563819	3482	29.526094	2159	30.83199	1950	33.01364	2336	6.56E-06	0.617488845	up	[M]	Cell wall/membrane/envelope biogenesis	Biological Process: hair follicle development (GO:0001942);; Molecular Function: 3-beta-hydroxy-delta5-steroid dehydrogenase activity (GO:0003854);; Biological Process: steroid biosynthetic process (GO:0006694);; Biological Process: smoothened signaling pathway (GO:0007224);; Biological Process: cholesterol metabolic process (GO:0008203);; Cellular Component: integral component of membrane (GO:00…	K07748|1.5e-209|hsa:50814|K07748 sterol-4alpha-carboxylate 3-dehydrogenase (decarboxylating) [EC:1.1.1.170] | (RefSeq) NSDHL, H105E3, SDR31E1, XAP104; NAD(P) dependent steroid dehydrogenase-like	Steroid biosynthesis (ko00100)	[IE]	Lipid transport and metabolism;; Amino acid transport and metabolism	3-beta hydroxysteroid dehydrogenase/isomerase family	Sterol-4-alpha-carboxylate 3-dehydrogenase, decarboxylating OS=Homo sapiens OX=9606 GN=NSDHL PE=1 SV=2	--	--	sterol-4-alpha-carboxylate 3-dehydrogenase, decarboxylating isoform X1 [Homo sapiens]	biological process: multicellular organismal process (GO:0032501);; biological process: developmental process (GO:0032502);; biological process: single-organism process (GO:0044699);; biological process: metabolic process (GO:0008152);; molecular function: catalytic activity (GO:0003824);; biological process: cellular process (GO:0009987);; biological process: signaling (GO:0023052);; biological …
ENSG00000175416	CLTB	90.510225	3922	97.595336	3876	88.413551	4216	54.17534	2658	59.17691	2653	69.741417	3200	2.93E-05	0.617192708	up	--	--	Molecular Function: structural molecule activity (GO:0005198);; Biological Process: intracellular protein transport (GO:0006886);; Biological Process: vesicle-mediated transport (GO:0016192);; Cellular Component: clathrin coat of trans-Golgi network vesicle (GO:0030130);; Cellular Component: clathrin coat of coated pit (GO:0030132);;	K04645|3.4e-34|hsa:1212|K04645 clathrin light chain B | (RefSeq) CLTB, LCB; clathrin light chain B	Lysosome (ko04142);; Endocytosis (ko04144);; Synaptic vesicle cycle (ko04721);; Endocrine and other factor-regulated calcium reabsorption (ko04961);; Huntington disease (ko05016);; Bacterial invasion of epithelial cells (ko05100)	[U]	Intracellular trafficking, secretion, and vesicular transport	Clathrin light chain	Clathrin light chain B OS=Homo sapiens OX=9606 GN=CLTB PE=1 SV=1	U	Intracellular trafficking, secretion, and vesicular transport	clathrin light chain B isoform d [Homo sapiens]	molecular function: structural molecule activity (GO:0005198);; biological process: localization (GO:0051179);; cellular component: cell (GO:0005623);; cellular component: membrane (GO:0016020);; cellular component: macromolecular complex (GO:0032991);; cellular component: organelle (GO:0043226);; cellular component: organelle part (GO:0044422);; cellular component: membrane part (GO:0044425);; c…
ENSG00000105327	BBC3	15.430521	1021	16.363436	946	15.426009	1157	9.581998	719	9.001982	612	12.067731	850	0.0002842	0.617083646	up	--	--	Cellular Component: mitochondrion (GO:0005739);; Biological Process: positive regulation of release of cytochrome c from mitochondria (GO:0090200);; Biological Process: intrinsic apoptotic signaling pathway (GO:0097193);;	K10132|6.5e-103|pon:100452429|K10132 Bcl-2-binding component 3 | (RefSeq) BBC3; bcl-2-binding component 3 isoform X1	Platinum drug resistance (ko01524);; p53 signaling pathway (ko04115);; Apoptosis (ko04210);; Apoptosis - multiple species (ko04215);; Hippo signaling pathway (ko04390);; Huntington disease (ko05016);; Measles (ko05162);; Pathways in cancer (ko05200);; Colorectal cancer (ko05210)	--	--	Bcl-2-binding component 3, p53 upregulated modulator of apoptosis	Bcl-2-binding component 3, isoforms 1/2 OS=Homo sapiens OX=9606 GN=BBC3 PE=1 SV=1	S	Function unknown	bcl-2-binding component 3 isoform X1 [Homo sapiens]	cellular component: cell (GO:0005623);; cellular component: organelle (GO:0043226);; cellular component: cell part (GO:0044464);; biological process: biological regulation (GO:0065007);; biological process: cellular process (GO:0009987);; biological process: signaling (GO:0023052);; biological process: single-organism process (GO:0044699);; biological process: response to stimulus (GO:0050896)
ENSG00000162572	SCNN1D	1.25517	89	1.048026	98	0.741294	94	0.609361	66	0.652064	68	0.372135	44	0.019105037	0.616885068	up	--	--	Molecular Function: ligand-gated sodium channel activity (GO:0015280);; Cellular Component: integral component of membrane (GO:0016021);;	K04826|0.0e+00|hsa:6339|K04826 amiloride-sensitive sodium channel subunit delta | (RefSeq) SCNN1D, ENaCd, ENaCdelta, SCNED, dNaCh; sodium channel epithelial 1 subunit delta	--	[PT]	Inorganic ion transport and metabolism;; Signal transduction mechanisms	Amiloride-sensitive sodium channel	Amiloride-sensitive sodium channel subunit delta OS=Homo sapiens OX=9606 GN=SCNN1D PE=1 SV=3	P	Inorganic ion transport and metabolism	Sodium channel, nonvoltage-gated 1, delta [Homo sapiens]	biological process: localization (GO:0051179);; molecular function: transporter activity (GO:0005215);; molecular function: molecular transducer activity (GO:0060089);; cellular component: membrane (GO:0016020);; cellular component: membrane part (GO:0044425)
ENSG00000119013	NDUFB3	33.012172	895	34.412122	833	32.508384	962	21.564084	656	20.139988	538	24.933316	702	0.000131676	0.61639558	up	--	--	Cellular Component: mitochondrion (GO:0005739);; Cellular Component: integral component of membrane (GO:0016021);; Biological Process: electron transport chain (GO:0022900);;	K03959|1.5e-50|ggo:101132493|K03959 NADH dehydrogenase (ubiquinone) 1 beta subcomplex subunit 3 | (RefSeq) NDUFB3; NADH dehydrogenase [ubiquinone] 1 beta subcomplex subunit 3	Oxidative phosphorylation (ko00190);; Thermogenesis (ko04714);; Retrograde endocannabinoid signaling (ko04723);; Non-alcoholic fatty liver disease (ko04932);; Alzheimer disease (ko05010);; Parkinson disease (ko05012);; Amyotrophic lateral sclerosis (ko05014);; Huntington disease (ko05016);; Prion disease (ko05020)	[C]	Energy production and conversion	NADH-ubiquinone oxidoreductase B12 subunit family	NADH dehydrogenase [ubiquinone] 1 beta subcomplex subunit 3 OS=Homo sapiens OX=9606 GN=NDUFB3 PE=1 SV=3	C	Energy production and conversion	NADH dehydrogenase [ubiquinone] 1 beta subcomplex subunit 3 [Pan troglodytes]	cellular component: cell (GO:0005623);; cellular component: organelle (GO:0043226);; cellular component: cell part (GO:0044464);; cellular component: membrane (GO:0016020);; cellular component: membrane part (GO:0044425);; biological process: metabolic process (GO:0008152);; biological process: cellular process (GO:0009987);; biological process: single-organism process (GO:0044699)
ENSG00000182534	MXRA7	1.951503	266	2.318254	273	2.287965	336	1.734467	178	1.441978	199	1.763081	220	0.002372509	0.614776383	up	--	--	--	K03479|7.0e-47|oor:101286810|K03479 alpha-N-acetylgalactosaminide alpha-2,6-sialyltransferase (sialyltransferase 7A) [EC:2.4.99.3] | (RefSeq) ST6GALNAC1; LOW QUALITY PROTEIN: alpha-N-acetylgalactosaminide alpha-2,6-sialyltransferase 1	Mucin type O-glycan biosynthesis (ko00512)	--	--	--	Matrix-remodeling-associated protein 7 OS=Homo sapiens OX=9606 GN=MXRA7 PE=1 SV=1	S	Function unknown	matrix-remodeling-associated protein 7 isoform 1 precursor [Homo sapiens]	--
ENSG00000123989	CHPF	56.571919	6118	51.935794	5002	51.894869	6186	32.141958	3828	32.912718	3535	43.510922	4806	0.00012848	0.612763272	up	--	--	Molecular Function: acetylgalactosaminyltransferase activity (GO:0008376);; Cellular Component: Golgi cisterna membrane (GO:0032580);;	K00747|0.0e+00|hsa:79586|K00747 chondroitin polymerizing factor [EC:2.4.1.175 2.4.1.226] | (RefSeq) CHPF, CHSY2, CSS2; chondroitin polymerizing factor	Glycosaminoglycan biosynthesis - chondroitin sulfate / dermatan sulfate (ko00532)	[S]	Function unknown	Chondroitin N-acetylgalactosaminyltransferase	Chondroitin sulfate synthase 2 OS=Homo sapiens OX=9606 GN=CHPF PE=1 SV=2	O	Posttranslational modification, protein turnover, chaperones	chondroitin sulfate synthase 2 isoform 1 [Homo sapiens]	molecular function: catalytic activity (GO:0003824);; cellular component: cell (GO:0005623);; cellular component: membrane (GO:0016020);; cellular component: organelle (GO:0043226);; cellular component: organelle part (GO:0044422);; cellular component: cell part (GO:0044464)
ENSG00000168394	TAP1	12.996679	1427	11.534979	1129	13.563128	1640	7.784224	940	8.175306	895	9.738627	1105	0.000156232	0.611800039	up	[V]	Defense mechanisms	Biological Process: antigen processing and presentation of exogenous peptide antigen via MHC class I, TAP-dependent (GO:0002479);; Molecular Function: ATP binding (GO:0005524);; Cellular Component: endoplasmic reticulum (GO:0005783);; Biological Process: defense response (GO:0006952);; Molecular Function: peptide antigen-transporting ATPase activity (GO:0015433);; Molecular Function: ATPase activ…	K05653|0.0e+00|hsa:6890|K05653 ATP-binding cassette, subfamily B (MDR/TAP), member 2 | (RefSeq) TAP1, ABC17, ABCB2, APT1, D6S114E, PSF-1, PSF1, RING4, TAP1*0102N, TAP1N; transporter 1, ATP binding cassette subfamily B member	ABC transporters (ko02010);; Phagosome (ko04145);; Antigen processing and presentation (ko04612);; Human cytomegalovirus infection (ko05163);; Herpes simplex virus 1 infection (ko05168);; Epstein-Barr virus infection (ko05169);; Human immunodeficiency virus 1 infection (ko05170);; Primary immunodeficiency (ko05340)	[U]	Intracellular trafficking, secretion, and vesicular transport	ABC transporter transmembrane region	Antigen peptide transporter 1 OS=Homo sapiens OX=9606 GN=TAP1 PE=1 SV=2	U	Intracellular trafficking, secretion, and vesicular transport	RecName: Full=Antigen peptide transporter 1; Short=APT1; AltName: Full=ATP-binding cassette sub-family B member 2; AltName: Full=Peptide supply factor 1; AltName: Full=Peptide transporter PSF1; Short=PSF-1; AltName: Full=Peptide transporter TAP1; AltName: Full=Peptide transporter involved in antigen processing 1; AltName: Full=Really interesting new gene 4 protein [Homo sapiens]	biological process: immune system process (GO:0002376);; molecular function: binding (GO:0005488);; cellular component: cell (GO:0005623);; cellular component: organelle (GO:0043226);; cellular component: cell part (GO:0044464);; biological process: response to stimulus (GO:0050896);; biological process: localization (GO:0051179);; molecular function: catalytic activity (GO:0003824);; molecular f…
Homo_sapiens_newGene_11995	--	1.782936	320	2.180515	402	1.868442	430	0.949678	223	1.383189	274	1.343347	290	0.003285462	0.610617889	up	--	--	--	--	--	--	--	--	--	--	--	--	--
ENSG00000198355	PIM3	53.545078	4706	57.285446	4488	61.971264	5997	33.59911	3246	36.524139	3198	46.312519	4204	0.000172129	0.610399759	up	[T]	Signal transduction mechanisms	Molecular Function: protein serine/threonine kinase activity (GO:0004674);; Molecular Function: ATP binding (GO:0005524);; Cellular Component: nucleolus (GO:0005730);; Cellular Component: cytosol (GO:0005829);; Molecular Function: manganese ion binding (GO:0030145);; Biological Process: hyaluronan metabolic process (GO:0030212);; Biological Process: negative regulation of apoptotic process (GO:00…	K08807|5.0e-188|hsa:415116|K08807 proto-oncogene serine/threonine-protein kinase Pim-3 [EC:2.7.11.1] | (RefSeq) PIM3, pim-3; Pim-3 proto-oncogene, serine/threonine kinase	--	[T]	Signal transduction mechanisms	Protein kinase domain	Serine/threonine-protein kinase pim-3 OS=Homo sapiens OX=9606 GN=PIM3 PE=1 SV=3	T	Signal transduction mechanisms	serine/threonine-protein kinase pim-3 [Homo sapiens]	biological process: metabolic process (GO:0008152);; biological process: cellular process (GO:0009987);; molecular function: catalytic activity (GO:0003824);; molecular function: binding (GO:0005488);; cellular component: cell (GO:0005623);; cellular component: organelle (GO:0043226);; cellular component: organelle part (GO:0044422);; cellular component: cell part (GO:0044464);; biological proces…
ENSG00000049089	COL9A2	13.664582	1451	14.809689	1402	16.122335	1885	8.977509	1048	8.582145	908	12.170465	1335	0.000680345	0.609533883	up	--	--	Cellular Component: collagen trimer (GO:0005581);;	K08131|1.7e-20|ggo:101125128|K08131 collagen type IX alpha | (RefSeq) COL9A2; collagen alpha-2(IX) chain isoform X1	PI3K-Akt signaling pathway (ko04151);; Focal adhesion (ko04510);; ECM-receptor interaction (ko04512);; Protein digestion and absorption (ko04974);; Human papillomavirus infection (ko05165)	[W]	Extracellular structures	Collagen triple helix repeat (20 copies)	Collagen alpha-2(IX) chain OS=Homo sapiens OX=9606 GN=COL9A2 PE=1 SV=2	W	Extracellular structures	collagen alpha-2(IX) chain isoform X5 [Homo sapiens]	cellular component: macromolecular complex (GO:0032991)
ENSG00000184924	PTRHD1	14.304132	587	21.750202	795	23.253859	1050	12.057021	544	12.677557	518	14.367583	609	0.002071952	0.609138724	up	--	--	Molecular Function: aminoacyl-tRNA hydrolase activity (GO:0004045);;	K14394|5.9e-21|cbr:CBG13912|K14394 low molecular weight phosphotyrosine protein phosphatase [EC:3.1.3.2 3.1.3.48] | (RefSeq) Hypothetical protein CBG13912	Thiamine metabolism (ko00730);; Riboflavin metabolism (ko00740)	[S]	Function unknown	Peptidyl-tRNA hydrolase PTH2	Putative peptidyl-tRNA hydrolase PTRHD1 OS=Homo sapiens OX=9606 GN=PTRHD1 PE=1 SV=1	S	Function unknown	putative peptidyl-tRNA hydrolase PTRHD1 [Homo sapiens]	molecular function: catalytic activity (GO:0003824)
Homo_sapiens_newGene_499	--	42.180725	1179	44.975967	1120	43.707077	1345	23.391319	719	28.527542	794	35.387012	1021	0.000724671	0.609075836	up	[J]	Translation, ribosomal structure and biogenesis	Molecular Function: structural constituent of ribosome (GO:0003735);; Cellular Component: nucleus (GO:0005634);; Biological Process: translation (GO:0006412);; Cellular Component: cytosolic small ribosomal subunit (GO:0022627);; Biological Process: cell differentiation (GO:0030154);;	K02984|4.4e-99|aju:106983261|K02984 small subunit ribosomal protein S3Ae | (RefSeq) 40S ribosomal protein S3a	Ribosome (ko03010)	[J]	Translation, ribosomal structure and biogenesis	Ribosomal S3Ae family	40S ribosomal protein S3a OS=Homo sapiens OX=9606 GN=RPS3A PE=1 SV=2	J	Translation, ribosomal structure and biogenesis	40S ribosomal protein S3a isoform X2 [Pan paniscus]	molecular function: structural molecule activity (GO:0005198);; cellular component: cell (GO:0005623);; cellular component: organelle (GO:0043226);; cellular component: cell part (GO:0044464);; biological process: metabolic process (GO:0008152);; biological process: cellular process (GO:0009987);; cellular component: macromolecular complex (GO:0032991);; cellular component: organelle part (GO:004…
Homo_sapiens_newGene_7412	--	0.551974	108	0.396228	70	0.309525	67	0.251369	54	0.204822	40	0.263919	54	0.028968141	0.608807831	up	--	--	--	--	--	--	--	--	--	--	--	--	--
ENSG00000124935	SCGB1D2	84.006882	1496	75.953667	1206	96.222748	1887	53.129475	1040	49.327957	876	68.530319	1261	0.000751032	0.608631744	up	--	--	Molecular Function: molecular_function (GO:0003674);; Molecular Function: binding (GO:0005488);; Molecular Function: protein binding (GO:0005515);; Cellular Component: cellular_component (GO:0005575);; Cellular Component: extracellular region (GO:0005576);; Cellular Component: extracellular space (GO:0005615);; Cellular Component: extracellular region part (GO:0044421);; Molecular Function: prote…	--	--	--	--	Uteroglobin family	Secretoglobin family 1D member 2 OS=Homo sapiens OX=9606 GN=SCGB1D2 PE=2 SV=1	S	Function unknown	secretoglobin family 1D member 2 precursor [Homo sapiens]	molecular function: binding (GO:0005488);; cellular component: extracellular region (GO:0005576);; cellular component: extracellular region part (GO:0044421)
Homo_sapiens_newGene_7061	--	0.59559	59	0.649129	51	0.794024	87	0.436794	36	0.412426	40	0.384108	40	0.029946872	0.608596814	up	--	--	--	--	--	--	--	--	--	--	--	uncharacterized protein LOC105740228 [Nomascus leucogenys]	--
ENSG00000092929	UNC13D	5.093185	824	6.091858	883	5.01724	901	3.562687	632	3.255774	527	4.114246	690	0.000358693	0.606392321	up	--	--	Cellular Component: lytic vacuole (GO:0000323);; Biological Process: cell activation (GO:0001775);; Biological Process: cell killing (GO:0001906);; Biological Process: leukocyte mediated cytotoxicity (GO:0001909);; Biological Process: natural killer cell mediated immunity (GO:0002228);; Biological Process: adaptive immune response (GO:0002250);; Biological Process: immune effector process (GO:000…	K19728|0.0e+00|hsa:201294|K19728 protein unc-13 D | (RefSeq) UNC13D, FHL3, HLH3, HPLH3, Munc13-4; unc-13 homolog D	--	[UT]	Intracellular trafficking, secretion, and vesicular transport;; Signal transduction mechanisms	C2 domain	Protein unc-13 homolog D OS=Homo sapiens OX=9606 GN=UNC13D PE=1 SV=1	U	Intracellular trafficking, secretion, and vesicular transport	protein unc-13 homolog D [Homo sapiens]	cellular component: cell (GO:0005623);; cellular component: organelle (GO:0043226);; cellular component: cell part (GO:0044464);; biological process: cellular process (GO:0009987);; biological process: single-organism process (GO:0044699);; biological process: cell killing (GO:0001906);; biological process: immune system process (GO:0002376);; biological process: response to stimulus (GO:0050896)…
ENSG00000185813	PCYT2	78.326726	9701	125.004923	9690	96.892884	11946	52.765509	7255	52.677987	6966	74.658852	8214	8.14E-06	0.606142461	up	[M]	Cell wall/membrane/envelope biogenesis	Molecular Function: catalytic activity (GO:0003824);; Biological Process: biosynthetic process (GO:0009058);;	K00967|1.4e-229|hsa:5833|K00967 ethanolamine-phosphate cytidylyltransferase [EC:2.7.7.14] | (RefSeq) PCYT2, ET, SPG82; phosphate cytidylyltransferase 2, ethanolamine	Phosphonate and phosphinate metabolism (ko00440);; Glycerophospholipid metabolism (ko00564)	[I]	Lipid transport and metabolism	Cytidylyltransferase-like	Ethanolamine-phosphate cytidylyltransferase OS=Homo sapiens OX=9606 GN=PCYT2 PE=1 SV=1	I	Lipid transport and metabolism	ethanolamine-phosphate cytidylyltransferase [Pan troglodytes]	molecular function: catalytic activity (GO:0003824);; biological process: metabolic process (GO:0008152)
ENSG00000198125	MB	76.368666	2378	94.546463	2679	94.867233	3416	61.446814	2078	55.578272	1784	51.377173	2161	8.05E-05	0.605966134	up	--	--	Molecular Function: oxygen transporter activity (GO:0005344);; Molecular Function: oxygen binding (GO:0019825);; Molecular Function: heme binding (GO:0020037);; Molecular Function: metal ion binding (GO:0046872);;	K21892|9.2e-84|hsa:4151|K21892 myoglobin | (RefSeq) MB, PVALB; myoglobin	--	[C]	Energy production and conversion	Globin	Myoglobin OS=Homo sapiens OX=9606 GN=MB PE=1 SV=2	C	Energy production and conversion	myoglobin isoform 1 [Homo sapiens]	biological process: localization (GO:0051179);; molecular function: transporter activity (GO:0005215);; molecular function: binding (GO:0005488)
ENSG00000145901	TNIP1	37.195977	3638	32.979245	2900	33.448015	3737	21.807166	2333	21.965783	2202	26.937329	2761	5.94E-05	0.605961221	up	--	--	Biological Process: MyD88-dependent toll-like receptor signaling pathway (GO:0002755);; Cellular Component: nucleoplasm (GO:0005654);; Cellular Component: cytosol (GO:0005829);; Biological Process: negative regulation of I-kappaB kinase/NF-kappaB signaling (GO:0043124);; Biological Process: regulation of inflammatory response (GO:0050727);; Biological Process: negative regulation of ERK1 and ERK2…	K23829|2.0e-291|hsa:10318|K23829 TNFAIP3-interacting protein 1 | (RefSeq) TNIP1, ABIN-1, NAF1, VAN, nip40-1; TNFAIP3 interacting protein 1	Shigellosis (ko05131)	--	--	--	TNFAIP3-interacting protein 1 OS=Homo sapiens OX=9606 GN=TNIP1 PE=1 SV=2	K	Transcription	TNFAIP3-interacting protein 1 isoform 1 [Homo sapiens]	biological process: immune system process (GO:0002376);; biological process: cellular process (GO:0009987);; biological process: signaling (GO:0023052);; biological process: single-organism process (GO:0044699);; biological process: response to stimulus (GO:0050896);; biological process: biological regulation (GO:0065007);; cellular component: cell (GO:0005623);; cellular component: organelle (GO…
ENSG00000169964	TMEM42	3.951568	151	5.228586	178	5.432662	228	3.495209	147	2.47523	94	3.305218	130	0.010355148	0.605439759	up	--	--	--	K03767|7.0e-10|ggo:101141840|K03767 peptidyl-prolyl cis-trans isomerase A (cyclophilin A) [EC:5.2.1.8] | (RefSeq) TMEM42; LOW QUALITY PROTEIN: transmembrane protein 42	Necroptosis (ko04217)	--	--	--	Transmembrane protein 42 OS=Homo sapiens OX=9606 GN=TMEM42 PE=1 SV=2	S	Function unknown	transmembrane protein 42 [Pan troglodytes]	--
ENSG00000183617	MRPL54	30.332333	705	32.250771	668	31.936899	817	20.037193	511	20.96571	486	23.354624	560	0.000108744	0.604979885	up	--	--	Cellular Component: organellar ribosome (GO:0000313);; Cellular Component: organellar large ribosomal subunit (GO:0000315);; Cellular Component: cellular_component (GO:0005575);; Cellular Component: intracellular (GO:0005622);; Cellular Component: cell (GO:0005623);; Cellular Component: cytoplasm (GO:0005737);; Cellular Component: mitochondrion (GO:0005739);; Cellular Component: mitochondrial env…	K17435|4.9e-76|hsa:116541|K17435 large subunit ribosomal protein L54 | (RefSeq) MRPL54, L54mt, MRP-L54; mitochondrial ribosomal protein L54	--	[J]	Translation, ribosomal structure and biogenesis	Mitochondrial ribosomal protein L37	39S ribosomal protein L54, mitochondrial OS=Homo sapiens OX=9606 GN=MRPL54 PE=1 SV=1	J	Translation, ribosomal structure and biogenesis	39S ribosomal protein L54, mitochondrial [Homo sapiens]	cellular component: cell (GO:0005623);; cellular component: macromolecular complex (GO:0032991);; cellular component: organelle (GO:0043226);; cellular component: organelle part (GO:0044422);; cellular component: cell part (GO:0044464);; cellular component: membrane (GO:0016020);; cellular component: membrane-enclosed lumen (GO:0031974);; biological process: metabolic process (GO:0008152);; biolo…
Homo_sapiens_newGene_11836	--	2.89396	196	3.331156	201	1.66394	124	0.968476	72	1.222727	83	2.25084	157	0.03167414	0.603867218	up	--	--	--	--	--	--	--	--	--	--	--	--	--
Homo_sapiens_newGene_8445	--	0.690191	95	0.35525	51	0.447038	79	0.221866	39	0.35505	57	0.217442	36	0.033454072	0.603254737	up	--	--	--	--	--	--	--	--	--	--	--	--	--
ENSG00000126005	MMP24OS	57.029428	2457	55.855021	1852	49.395729	2322	29.579393	1370	33.660916	1436	42.455588	1846	0.000518517	0.603090761	up	--	--	Biological Process: ribosomal subunit export from nucleus (GO:0000054);; Biological Process: maturation of 5.8S rRNA (GO:0000460);; Biological Process: maturation of LSU-rRNA (GO:0000470);; Biological Process: regulation of immune system process (GO:0002682);; Molecular Function: molecular_function (GO:0003674);; Molecular Function: binding (GO:0005488);; Cellular Component: cellular_component (G…	--	--	--	--	--	Protein MMP24OS OS=Homo sapiens OX=9606 GN=MMP24OS PE=1 SV=1	J	Translation, ribosomal structure and biogenesis	protein MMP24OS [Homo sapiens]	biological process: localization (GO:0051179);; biological process: metabolic process (GO:0008152);; biological process: cellular process (GO:0009987);; biological process: cellular component organization or biogenesis (GO:0071840);; biological process: biological regulation (GO:0065007);; molecular function: binding (GO:0005488);; cellular component: cell (GO:0005623);; cellular component: cell …
Homo_sapiens_newGene_10029	--	0.688202	40	0.650292	34	1.00731	64	0.357149	23	0.350586	21	0.486029	29	0.040757004	0.603044624	up	--	--	Molecular Function: nucleic acid binding (GO:0003676);; Molecular Function: zinc ion binding (GO:0008270);;	K17561|5.8e-13|ccan:109691137|K17561 coiled-coil domain-containing protein 8 | (RefSeq) Ccdc8; LOW QUALITY PROTEIN: coiled-coil domain-containing protein 8	--	--	--	PNMA	Paraneoplastic antigen-like protein 6A OS=Homo sapiens OX=9606 GN=PNMA6A PE=1 SV=2	S	Function unknown	paraneoplastic antigen-like protein 6A [Homo sapiens]	molecular function: binding (GO:0005488)
ENSG00000115350	POLE4	19.125462	886	27.159071	1121	22.827013	1164	13.056772	665	14.786126	683	18.191704	870	0.001320666	0.602761516	up	--	--	Biological Process: G1/S transition of mitotic cell cycle (GO:0000082);; Cellular Component: histone acetyltransferase complex (GO:0000123);; Cellular Component: nuclear chromosome (GO:0000228);; Biological Process: mitotic cell cycle (GO:0000278);; Molecular Function: molecular_function (GO:0003674);; Molecular Function: catalytic activity (GO:0003824);; Molecular Function: DNA-directed DNA poly…	K03506|3.4e-54|hsa:56655|K03506 DNA polymerase epsilon subunit 4 [EC:2.7.7.7] | (RefSeq) POLE4, YHHQ1, p12; DNA polymerase epsilon 4, accessory subunit	DNA replication (ko03030);; Base excision repair (ko03410);; Nucleotide excision repair (ko03420)	[L]	Replication, recombination and repair	Histone-like transcription factor (CBF/NF-Y) and archaeal histone	DNA polymerase epsilon subunit 4 OS=Homo sapiens OX=9606 GN=POLE4 PE=1 SV=2	B	Chromatin structure and dynamics	DNA polymerase epsilon subunit 4 [Homo sapiens]	biological process: cellular process (GO:0009987);; biological process: single-organism process (GO:0044699);; cellular component: cell (GO:0005623);; cellular component: membrane-enclosed lumen (GO:0031974);; cellular component: macromolecular complex (GO:0032991);; cellular component: organelle (GO:0043226);; cellular component: organelle part (GO:0044422);; cellular component: cell part (GO:00…
ENSG00000110484	SCGB2A2	1301.766578	24487	1536.633172	25787	1484.524945	30745	870.008861	18252	992.192009	18783	1085.252283	21099	1.20E-05	0.602641938	up	--	--	--	K12404|2.1e-19|pon:100455667|K12404 ADP-ribosylation factor-binding protein GGA | (RefSeq) uncharacterized protein LOC100455667	Lysosome (ko04142)	--	--	Uteroglobin family	Mammaglobin-A OS=Homo sapiens OX=9606 GN=SCGB2A2 PE=1 SV=1	S	Function unknown	mammaglobin-A isoform X1 [Homo sapiens]	--
ENSG00000140853	NLRC5	0.535639	131	0.619291	135	0.446848	119	0.559383	110	0.252433	64	0.359218	80	0.017749612	0.600846268	up	--	--	Cellular Component: centrosome (GO:0005813);;	K22615|0.0e+00|hsa:84166|K22615 NLR family CARD domain containing 5 | (RefSeq) NLRC5, CLR16.1, NOD27, NOD4; NLR family CARD domain containing 5	--	[S]	Function unknown	Atypical caspase recruitment domain	Protein NLRC5 OS=Homo sapiens OX=9606 GN=NLRC5 PE=1 SV=3	S	Function unknown	protein NLRC5 isoform 1 [Homo sapiens]	cellular component: cell (GO:0005623);; cellular component: organelle (GO:0043226);; cellular component: organelle part (GO:0044422);; cellular component: cell part (GO:0044464)
ENSG00000070404	FSTL3	3.672667	288	6.165446	440	5.864717	519	3.271323	254	3.413051	262	3.952803	325	0.007712126	0.600085811	up	--	--	Biological Process: kidney development (GO:0001822);; Cellular Component: extracellular space (GO:0005615);; Cellular Component: nucleoplasm (GO:0005654);; Cellular Component: Golgi apparatus (GO:0005794);; Biological Process: spermatogenesis (GO:0007283);; Biological Process: male gonad development (GO:0008584);; Cellular Component: secretory granule (GO:0030141);; Biological Process: lung devel…	K23913|4.2e-161|hsa:10272|K23913 follistatin-related protein 3 | (RefSeq) FSTL3, FLRG, FSRP; follistatin like 3	--	[R]	General function prediction only	Kazal-type serine protease inhibitor domain	Follistatin-related protein 3 OS=Homo sapiens OX=9606 GN=FSTL3 PE=1 SV=1	S	Function unknown	follistatin-related protein 3 precursor [Homo sapiens]	biological process: multicellular organismal process (GO:0032501);; biological process: developmental process (GO:0032502);; biological process: single-organism process (GO:0044699);; cellular component: extracellular region (GO:0005576);; cellular component: extracellular region part (GO:0044421);; cellular component: cell (GO:0005623);; cellular component: organelle (GO:0043226);; cellular comp…
ENSG00000185386	MAPK11	8.336628	753	8.646571	696	7.637793	759	5.457408	542	5.069688	457	6.181971	577	0.000254994	0.600009426	up	[M]	Cell wall/membrane/envelope biogenesis	Molecular Function: MAP kinase activity (GO:0004707);; Molecular Function: ATP binding (GO:0005524);; Cellular Component: cytosol (GO:0005829);; Cellular Component: nuclear speck (GO:0016607);; Biological Process: p38MAPK cascade (GO:0038066);;	K04441|1.7e-208|hsa:5600|K04441 p38 MAP kinase [EC:2.7.11.24] | (RefSeq) MAPK11, P38B, P38BETA2, PRKM11, SAPK2, SAPK2B, p38-2, p38Beta; mitogen-activated protein kinase 11	Endocrine resistance (ko01522);; MAPK signaling pathway (ko04010);; Rap1 signaling pathway (ko04015);; FoxO signaling pathway (ko04068);; Sphingolipid signaling pathway (ko04071);; Oocyte meiosis (ko04114);; Cellular senescence (ko04218);; Adrenergic signaling in cardiomyocytes (ko04261);; VEGF signaling pathway (ko04370);; Osteoclast differentiation (ko04380);; Signaling pathways regulating plur…	[T]	Signal transduction mechanisms	Protein kinase domain	Mitogen-activated protein kinase 11 OS=Homo sapiens OX=9606 GN=MAPK11 PE=1 SV=2	T	Signal transduction mechanisms	mitogen-activated protein kinase 11 [Homo sapiens]	biological process: metabolic process (GO:0008152);; biological process: cellular process (GO:0009987);; biological process: signaling (GO:0023052);; biological process: single-organism process (GO:0044699);; biological process: response to stimulus (GO:0050896);; biological process: biological regulation (GO:0065007);; molecular function: catalytic activity (GO:0003824);; molecular function: sig…
ENSG00000188483	IER5L	31.56599	3175	34.143787	3061	32.653561	3616	20.816181	2301	18.94768	1899	26.863583	2791	0.000321151	0.598805332	up	--	--	--	--	--	--	--	Immediate early response protein (IER)	Immediate early response gene 5-like protein OS=Homo sapiens OX=9606 GN=IER5L PE=2 SV=1	S	Function unknown	immediate early response gene 5-like protein [Homo sapiens]	--
ENSG00000246705	H2AFJ	156.359518	3909	194.846	4274	188.846505	5114	108.18213	3118	105.443337	2697	142.932917	3653	0.000186918	0.598750314	up	--	--	Cellular Component: nucleosome (GO:0000786);; Molecular Function: DNA binding (GO:0003677);; Cellular Component: nucleus (GO:0005634);; Molecular Function: protein heterodimerization activity (GO:0046982);;	K11251|1.1e-42|bbub:102402131|K11251 histone H2A | (RefSeq) histone H2A.J	Necroptosis (ko04217);; Alcoholism (ko05034);; Systemic lupus erythematosus (ko05322)	[B]	Chromatin structure and dynamics	C-terminus of histone H2A	Histone H2A.J OS=Homo sapiens OX=9606 GN=H2AJ PE=1 SV=1	B	Chromatin structure and dynamics	H2AFJ isoform 1, partial [Pan troglodytes]	cellular component: cell (GO:0005623);; cellular component: macromolecular complex (GO:0032991);; cellular component: organelle (GO:0043226);; cellular component: organelle part (GO:0044422);; cellular component: cell part (GO:0044464);; molecular function: binding (GO:0005488)
ENSG00000100300	TSPO	159.765496	5243	196.110744	5757	202.412348	7303	107.504108	3855	121.546958	3974	151.350892	5084	0.00037715	0.598693542	up	[T]	Signal transduction mechanisms	Cellular Component: integral component of membrane (GO:0016021);;	K05770|1.1e-101|hsa:706|K05770 translocator protein | (RefSeq) TSPO, BPBS, BZRP, DBI, IBP, MBR, PBR, PBS, PKBS, PTBR, mDRC, pk18; translocator protein	Neuroactive ligand-receptor interaction (ko04080);; Cholesterol metabolism (ko04979);; Human T-cell leukemia virus 1 infection (ko05166)	[T]	Signal transduction mechanisms	TspO/MBR family	Translocator protein OS=Homo sapiens OX=9606 GN=TSPO PE=1 SV=3	T	Signal transduction mechanisms	translocator protein [Homo sapiens]	cellular component: membrane (GO:0016020);; cellular component: membrane part (GO:0044425)
ENSG00000187957	DNER	1.105727	134	0.381431	42	0.810633	108	0.562453	75	0.276935	34	0.375529	47	0.041347822	0.59850063	up	--	--	Molecular Function: calcium ion binding (GO:0005509);; Cellular Component: integral component of membrane (GO:0016021);;	K19601|2.1e-16|acs:107983242|K19601 protein eyes shut | (RefSeq) protein eyes shut homolog	--	[T]	Signal transduction mechanisms	EGF-like domain	Delta and Notch-like epidermal growth factor-related receptor OS=Homo sapiens OX=9606 GN=DNER PE=1 SV=1	T	Signal transduction mechanisms	unnamed protein product [Homo sapiens]	molecular function: binding (GO:0005488);; cellular component: membrane (GO:0016020);; cellular component: membrane part (GO:0044425)
ENSG00000125148	MT2A	16.814888	491	19.648771	511	16.130953	516	11.771656	378	8.859344	257	13.9607	420	0.00371892	0.59829683	up	--	--	Molecular Function: metal ion binding (GO:0046872);;	K14739|3.1e-06|ggo:101124572|K14739 metallothionein 1/2 | (RefSeq) metallothionein-2	Mineral absorption (ko04978)	[P]	Inorganic ion transport and metabolism	Metallothionein	Metallothionein-2 OS=Homo sapiens OX=9606 GN=MT2A PE=1 SV=1	--	--	metallothionein-2 [Pongo abelii]	molecular function: binding (GO:0005488)
ENSG00000130477	UNC13A	0.19876	73	0.10371	34	0.197848	80	0.117266	48	0.070957	26	0.075767	29	0.041325616	0.59794679	up	--	--	Molecular Function: calcium ion binding (GO:0005509);; Molecular Function: phospholipid binding (GO:0005543);; Biological Process: synaptic vesicle priming (GO:0016082);; Biological Process: synaptic vesicle maturation (GO:0016188);; Molecular Function: diacylglycerol binding (GO:0019992);; Biological Process: synaptic transmission, glutamatergic (GO:0035249);; Biological Process: intracellular s…	K15293|0.0e+00|hsa:23025|K15293 protein unc-13 A/B/C | (RefSeq) UNC13A, Munc13-1; unc-13 homolog A	Synaptic vesicle cycle (ko04721)	[TU]	Signal transduction mechanisms;; Intracellular trafficking, secretion, and vesicular transport	C2 domain	Protein unc-13 homolog A OS=Homo sapiens OX=9606 GN=UNC13A PE=2 SV=4	--	--	protein unc-13 homolog A [Homo sapiens]	molecular function: binding (GO:0005488);; biological process: cellular process (GO:0009987);; biological process: signaling (GO:0023052);; biological process: single-organism process (GO:0044699);; biological process: localization (GO:0051179);; biological process: cellular component organization or biogenesis (GO:0071840);; biological process: presynaptic process involved in chemical synaptic t…
ENSG00000264343	NOTCH2NLA	10.640933	823	12.416222	843	11.076344	935	7.10941	606	7.797149	661	7.819932	609	5.25E-05	0.59681356	up	--	--	Molecular Function: calcium ion binding (GO:0005509);;	K20994|1.6e-63|hsa:4853|K20994 Notch 2 | (RefSeq) NOTCH2, AGS2, HJCYS, hN2; notch receptor 2	Endocrine resistance (ko01522);; Notch signaling pathway (ko04330);; Th1 and Th2 cell differentiation (ko04658);; Thyroid hormone signaling pathway (ko04919);; Human papillomavirus infection (ko05165);; Pathways in cancer (ko05200);; MicroRNAs in cancer (ko05206);; Breast cancer (ko05224)	[T]	Signal transduction mechanisms	EGF-like domain	Notch homolog 2 N-terminal-like protein A OS=Homo sapiens OX=9606 GN=NOTCH2NLA PE=1 SV=1	T	Signal transduction mechanisms	notch homolog 2 N-terminal-like protein C isoform 2 [Homo sapiens]	molecular function: binding (GO:0005488)
ENSG00000137267	TUBB2A	47.598488	2817	49.240925	2598	50.522884	3292	28.912951	1881	37.75985	2226	35.136257	2148	2.45E-05	0.59669237	up	[D]	Cell cycle control, cell division, chromosome partitioning	Molecular Function: GTPase activity (GO:0003924);; Molecular Function: structural constituent of cytoskeleton (GO:0005200);; Molecular Function: GTP binding (GO:0005525);; Cellular Component: cytoplasm (GO:0005737);; Cellular Component: microtubule (GO:0005874);; Biological Process: microtubule-based process (GO:0007017);;	K07375|3.0e-260|aju:106976143|K07375 tubulin beta | (RefSeq) TUBB2A; tubulin beta-2A chain isoform X1	Phagosome (ko04145);; Gap junction (ko04540);; Alzheimer disease (ko05010);; Parkinson disease (ko05012);; Amyotrophic lateral sclerosis (ko05014);; Huntington disease (ko05016);; Prion disease (ko05020)	[Z]	Cytoskeleton	Tubulin/FtsZ family, GTPase domain	Tubulin beta-2A chain OS=Homo sapiens OX=9606 GN=TUBB2A PE=1 SV=1	Z	Cytoskeleton	tubulin beta-2A chain isoform 1 [Homo sapiens]	molecular function: catalytic activity (GO:0003824);; molecular function: structural molecule activity (GO:0005198);; molecular function: binding (GO:0005488);; cellular component: cell (GO:0005623);; cellular component: cell part (GO:0044464);; cellular component: organelle (GO:0043226);; cellular component: organelle part (GO:0044422);; cellular component: supramolecular complex (GO:0099080);; …
Homo_sapiens_newGene_3278	--	0.848082	159	0.121665	21	0.388709	80	0.219254	45	0.242763	46	0.039207	8	0.040195436	0.596081158	up	--	--	--	--	--	--	--	--	--	--	--	--	--
ENSG00000099875	MKNK2	50.548783	6041	61.804472	6488	60.839644	7700	35.156395	4594	36.257362	4269	45.687334	5588	0.000140281	0.596072021	up	[T]	Signal transduction mechanisms	Molecular Function: protein serine/threonine kinase activity (GO:0004674);; Molecular Function: ATP binding (GO:0005524);;	K04372|1.3e-274|hsa:2872|K04372 MAP kinase interacting serine/threonine kinase [EC:2.7.11.1] | (RefSeq) MKNK2, GPRK7, MNK2; MAPK interacting serine/threonine kinase 2	MAPK signaling pathway (ko04010);; HIF-1 signaling pathway (ko04066);; Insulin signaling pathway (ko04910)	[T]	Signal transduction mechanisms	Protein kinase domain	MAP kinase-interacting serine/threonine-protein kinase 2 OS=Homo sapiens OX=9606 GN=MKNK2 PE=1 SV=3	T	Signal transduction mechanisms	Putative map kinase interacting kinase, partial [Homo sapiens]	biological process: metabolic process (GO:0008152);; biological process: cellular process (GO:0009987);; molecular function: catalytic activity (GO:0003824);; molecular function: binding (GO:0005488)
ENSG00000125775	SDCBP2	8.19215	463	7.616265	384	7.703901	479	4.801157	297	4.743918	268	6.180496	362	0.001812664	0.596020707	up	--	--	Cellular Component: nucleoplasm (GO:0005654);; Cellular Component: cytosol (GO:0005829);; Biological Process: chemical synaptic transmission (GO:0007268);; Cellular Component: integral component of membrane (GO:0016021);; Biological Process: actin cytoskeleton organization (GO:0030036);; Cellular Component: nuclear membrane (GO:0031965);; Biological Process: intracellular signal transduction (GO:…	K17254|2.1e-161|hsa:27111|K17254 syntenin-1 | (RefSeq) SDCBP2, SITAC, SITAC18, ST-2, ST2; syndecan binding protein 2	--	--	--	PDZ domain	Syntenin-2 OS=Homo sapiens OX=9606 GN=SDCBP2 PE=1 SV=2	T	Signal transduction mechanisms	syntenin-2 isoform a [Homo sapiens]	cellular component: cell (GO:0005623);; cellular component: organelle (GO:0043226);; cellular component: organelle part (GO:0044422);; cellular component: cell part (GO:0044464);; biological process: cellular process (GO:0009987);; biological process: signaling (GO:0023052);; biological process: single-organism process (GO:0044699);; cellular component: membrane (GO:0016020);; cellular component:…
ENSG00000174586	ZNF497	1.968172	200	2.213644	226	2.560499	319	1.495569	180	1.367741	156	1.501725	175	0.005220692	0.59587888	up	--	--	Molecular Function: RNA polymerase II transcription factor activity, sequence-specific DNA binding (GO:0000981);; Molecular Function: molecular_function (GO:0003674);; Molecular Function: nucleic acid binding (GO:0003676);; Molecular Function: transcription factor activity, sequence-specific DNA binding (GO:0003700);; Biological Process: regulation of transcription, DNA-templated (GO:0006355);; B…	K09228|4.5e-71|pps:103785743|K09228 KRAB domain-containing zinc finger protein | (RefSeq) ZNF497; zinc finger protein 497	Herpes simplex virus 1 infection (ko05168)	[R]	General function prediction only	Zinc-finger double domain	Zinc finger protein 497 OS=Homo sapiens OX=9606 GN=ZNF497 PE=1 SV=2	K	Transcription	zinc finger protein 497, isoform CRA_a [Homo sapiens]	biological process: biological regulation (GO:0065007);; molecular function: nucleic acid binding transcription factor activity (GO:0001071);; molecular function: binding (GO:0005488)
ENSG00000275074	NUDT18	4.940505	301	6.998888	387	6.629199	449	3.789179	259	3.618527	224	4.844041	302	0.00453215	0.595184307	up	[F]	Nucleotide transport and metabolism	Molecular Function: hydrolase activity (GO:0016787);;	K17817|3.7e-65|ggo:101132071|K17817 8-oxo-dGDP phosphatase [EC:3.6.1.58] | (RefSeq) NUDT18; LOW QUALITY PROTEIN: 8-oxo-dGDP phosphatase NUDT18	--	[T]	Signal transduction mechanisms	NUDIX domain	8-oxo-dGDP phosphatase NUDT18 OS=Homo sapiens OX=9606 GN=NUDT18 PE=1 SV=3	F	Nucleotide transport and metabolism	NUDT18 isoform 1 [Pan troglodytes]	molecular function: catalytic activity (GO:0003824)
ENSG00000106367	AP1S1	98.85811	4738	119.196849	5131	122.645727	6489	67.819188	3591	73.63348	3540	90.814277	4505	0.000242547	0.59421172	up	--	--	Cellular Component: Golgi apparatus (GO:0005794);; Cellular Component: cytosol (GO:0005829);; Biological Process: intracellular protein transport (GO:0006886);; Cellular Component: membrane coat (GO:0030117);; Biological Process: retrograde transport, endosome to Golgi (GO:0042147);; Cellular Component: terminal bouton (GO:0043195);; Cellular Component: intracellular membrane-bounded organelle (G…	K12394|3.0e-82|aju:106988111|K12394 AP-1 complex subunit sigma 1/2 | (RefSeq) AP1S1; AP-1 complex subunit sigma-1A	Lysosome (ko04142);; Human immunodeficiency virus 1 infection (ko05170)	[U]	Intracellular trafficking, secretion, and vesicular transport	Clathrin adaptor complex small chain	AP-1 complex subunit sigma-1A OS=Homo sapiens OX=9606 GN=AP1S1 PE=1 SV=1	U	Intracellular trafficking, secretion, and vesicular transport	PREDICTED: AP-1 complex subunit sigma-1A isoform X1 [Chlorocebus sabaeus]	cellular component: cell (GO:0005623);; cellular component: organelle (GO:0043226);; cellular component: cell part (GO:0044464);; biological process: localization (GO:0051179);; cellular component: membrane (GO:0016020);; cellular component: macromolecular complex (GO:0032991);; cellular component: membrane part (GO:0044425);; cellular component: synapse part (GO:0044456);; cellular component: sy…
ENSG00000155099	PIP4P2	1.741514	154	3.986842	213	2.056533	232	0.964023	108	1.588619	168	1.297338	121	0.015395314	0.593716059	up	--	--	Cellular Component: lysosomal membrane (GO:0005765);; Cellular Component: integral component of membrane (GO:0016021);; Cellular Component: late endosome membrane (GO:0031902);; Molecular Function: phosphatidylinositol-4,5-bisphosphate 4-phosphatase activity (GO:0034597);; Biological Process: phosphatidylinositol dephosphorylation (GO:0046856);;	K13084|1.2e-152|ggo:101129459|K13084 phosphatidylinositol-4,5-bisphosphate 4-phosphatase [EC:3.1.3.78] | (RefSeq) PIP4P2; type 2 phosphatidylinositol 4,5-bisphosphate 4-phosphatase	Phosphatidylinositol signaling system (ko04070)	[R]	General function prediction only	Transmembrane protein 55A	Type 2 phosphatidylinositol 4,5-bisphosphate 4-phosphatase OS=Homo sapiens OX=9606 GN=PIP4P2 PE=1 SV=1	S	Function unknown	type 2 phosphatidylinositol 4,5-bisphosphate 4-phosphatase [Homo sapiens]	cellular component: cell (GO:0005623);; cellular component: membrane (GO:0016020);; cellular component: organelle (GO:0043226);; cellular component: organelle part (GO:0044422);; cellular component: cell part (GO:0044464);; cellular component: membrane part (GO:0044425);; biological process: metabolic process (GO:0008152);; biological process: cellular process (GO:0009987);; molecular function: c…
ENSG00000171159	C9orf16	108.088768	2859	116.154411	2739	111.050133	3234	57.736404	1679	74.814934	1972	93.486458	2554	0.001043422	0.593589074	up	--	--	--	--	--	--	--	Uncharacterised protein family (UPF0184)	UPF0184 protein C9orf16 OS=Homo sapiens OX=9606 GN=C9orf16 PE=1 SV=1	S	Function unknown	UPF0184 protein C9orf16 [Homo sapiens]	--
ENSG00000117410	ATP6V0B	63.24017	2919	65.868976	2931	68.171678	3664	41.568045	2272	41.398843	2011	50.537373	2558	6.38E-05	0.592884557	up	--	--	Cellular Component: endosome (GO:0005768);; Molecular Function: hydrogen ion transmembrane transporter activity (GO:0015078);; Cellular Component: integral component of membrane (GO:0016021);; Cellular Component: proton-transporting V-type ATPase, V0 domain (GO:0033179);;	K03661|1.0e-106|lve:103086315|K03661 V-type H+-transporting ATPase 21kDa proteolipid subunit | (RefSeq) ATP6V0B; ATPase H+ transporting V0 subunit b	Oxidative phosphorylation (ko00190);; Lysosome (ko04142);; Phagosome (ko04145);; Synaptic vesicle cycle (ko04721);; Tuberculosis (ko05152);; Human papillomavirus infection (ko05165);; Rheumatoid arthritis (ko05323)	[C]	Energy production and conversion	ATP synthase subunit C	V-type proton ATPase 21 kDa proteolipid subunit OS=Homo sapiens OX=9606 GN=ATP6V0B PE=1 SV=1	C	Energy production and conversion	V-type proton ATPase 21 kDa proteolipid subunit isoform 3 [Homo sapiens]	cellular component: cell (GO:0005623);; cellular component: organelle (GO:0043226);; cellular component: cell part (GO:0044464);; biological process: localization (GO:0051179);; molecular function: transporter activity (GO:0005215);; cellular component: membrane (GO:0016020);; cellular component: membrane part (GO:0044425);; cellular component: macromolecular complex (GO:0032991)
ENSG00000243649	CFB	3.040478	323	1.701339	162	2.056478	237	1.06095	123	1.327209	141	1.870869	199	0.020848193	0.592728846	up	[O]	Posttranslational modification, protein turnover, chaperones	Molecular Function: serine-type endopeptidase activity (GO:0004252);; Cellular Component: extracellular region (GO:0005576);; Biological Process: complement activation (GO:0006956);;	K01335|0.0e+00|hsa:629|K01335 complement factor B [EC:3.4.21.47] | (RefSeq) CFB, AHUS4, ARMD14, BF, BFD, CFAB, CFBD, FB, FBI12, GBG, H2-Bf, PBF2; complement factor B	Complement and coagulation cascades (ko04610);; Staphylococcus aureus infection (ko05150)	[E]	Amino acid transport and metabolism	Trypsin	Complement factor B OS=Homo sapiens OX=9606 GN=CFB PE=1 SV=2	E	Amino acid transport and metabolism	complement factor B preproprotein [Homo sapiens]	biological process: metabolic process (GO:0008152);; molecular function: catalytic activity (GO:0003824);; cellular component: extracellular region (GO:0005576);; biological process: immune system process (GO:0002376);; biological process: response to stimulus (GO:0050896);; biological process: biological regulation (GO:0065007)
ENSG00000081041	CXCL2	1.050387	48	0.857874	35	0.836912	42	0.344501	18	0.631926	29	0.419987	20	0.045369165	0.591678477	up	--	--	Cellular Component: extracellular space (GO:0005615);; Biological Process: defense response (GO:0006952);; Biological Process: immune response (GO:0006955);; Molecular Function: chemokine activity (GO:0008009);;	K05505|1.6e-47|hsa:2920|K05505 C-X-C motif chemokine 1/2/3 | (RefSeq) CXCL2, CINC-2a, GRO2, GROb, MGSA-b, MIP-2a, MIP2, MIP2A, SCYB2; C-X-C motif chemokine ligand 2	Cytokine-cytokine receptor interaction (ko04060);; Viral protein interaction with cytokine and cytokine receptor (ko04061);; Chemokine signaling pathway (ko04062);; NF-kappa B signaling pathway (ko04064);; NOD-like receptor signaling pathway (ko04621);; IL-17 signaling pathway (ko04657);; TNF signaling pathway (ko04668);; Epithelial cell signaling in Helicobacter pylori infection (ko05120);; Legi…	--	--	Small cytokines (intecrine/chemokine), interleukin-8 like	C-X-C motif chemokine 2 OS=Homo sapiens OX=9606 GN=CXCL2 PE=1 SV=1	O	Posttranslational modification, protein turnover, chaperones	C-X-C motif chemokine 2 precursor [Homo sapiens]	cellular component: extracellular region (GO:0005576);; cellular component: extracellular region part (GO:0044421);; biological process: response to stimulus (GO:0050896);; biological process: immune system process (GO:0002376);; molecular function: binding (GO:0005488)
ENSG00000124391	IL17C	2.843379	111	2.352187	82	2.6326	113	0.677905	29	0.435921	17	2.419091	97	0.047142914	0.591101165	up	--	--	Biological Process: regulation of cytokine production (GO:0001817);; Biological Process: positive regulation of cytokine production (GO:0001819);; Biological Process: immune system process (GO:0002376);; Biological Process: immune system development (GO:0002520);; Biological Process: leukocyte differentiation (GO:0002521);; Biological Process: myeloid leukocyte differentiation (GO:0002573);; Mole…	K05491|2.9e-114|hsa:27189|K05491 interleukin 17C | (RefSeq) IL17C, CX2, IL-17C; interleukin 17C	Cytokine-cytokine receptor interaction (ko04060);; IL-17 signaling pathway (ko04657)	--	--	Interleukin-17	Interleukin-17C OS=Homo sapiens OX=9606 GN=IL17C PE=1 SV=1	O	Posttranslational modification, protein turnover, chaperones	interleukin-17C precursor [Homo sapiens]	biological process: biological regulation (GO:0065007);; biological process: immune system process (GO:0002376);; biological process: multicellular organismal process (GO:0032501);; biological process: developmental process (GO:0032502);; biological process: single-organism process (GO:0044699);; biological process: cellular process (GO:0009987);; molecular function: binding (GO:0005488);; cellul…
ENSG00000007255	TRAPPC6A	93.218752	2532	117.655257	2856	111.236332	3329	68.630298	2019	65.40969	1773	88.19735	2431	0.000412813	0.590642291	up	--	--	Biological Process: regulation of GTPase activity (GO:0043087);; Biological Process: Golgi vesicle transport (GO:0048193);;	K20304|6.1e-92|pps:100994271|K20304 trafficking protein particle complex subunit 6 | (RefSeq) TRAPPC6A; trafficking protein particle complex 6A	--	[U]	Intracellular trafficking, secretion, and vesicular transport	Transport protein particle (TRAPP) component	Trafficking protein particle complex subunit 6A OS=Homo sapiens OX=9606 GN=TRAPPC6A PE=1 SV=2	U	Intracellular trafficking, secretion, and vesicular transport	trafficking protein particle complex subunit 6A isoform 1 [Homo sapiens]	biological process: biological regulation (GO:0065007);; biological process: localization (GO:0051179)
ENSG00000178372	CALML5	67.830826	2162	78.035912	2217	72.043617	2528	42.454975	1487	46.506001	1477	59.565899	1961	0.000447452	0.589995711	up	--	--	Molecular Function: calcium ion binding (GO:0005509);;	K02183|1.9e-17|hsa:51806|K02183 calmodulin | (RefSeq) CALML5, CLSP; calmodulin like 5	Ras signaling pathway (ko04014);; Rap1 signaling pathway (ko04015);; Calcium signaling pathway (ko04020);; cGMP-PKG signaling pathway (ko04022);; cAMP signaling pathway (ko04024);; Phosphatidylinositol signaling system (ko04070);; Oocyte meiosis (ko04114);; Cellular senescence (ko04218);; Adrenergic signaling in cardiomyocytes (ko04261);; Vascular smooth muscle contraction (ko04270);; Apelin sign…	[T]	Signal transduction mechanisms	EF hand	Calmodulin-like protein 5 OS=Homo sapiens OX=9606 GN=CALML5 PE=1 SV=2	T	Signal transduction mechanisms	calmodulin-like skin protein [Homo sapiens]	molecular function: binding (GO:0005488)
Homo_sapiens_newGene_7924	--	2.300953	145	2.585158	133	2.012835	142	1.40032	102	1.435847	92	1.406588	94	0.009557517	0.589291929	up	--	--	--	K16944|1.2e-19|ggo:101137006|K16944 septin 7 | (RefSeq) septin-7-like	--	--	--	Rec (regulator of expression encoded by corf) of HERV-K-113	--	--	--	hCG1778981 [Homo sapiens]	--
Homo_sapiens_newGene_4747	--	1.888582	52	3.225198	78	2.375535	71	1.024624	31	1.551713	42	1.618921	46	0.039419144	0.588930484	up	--	--	Molecular Function: GTPase activity (GO:0003924);; Molecular Function: GTP binding (GO:0005525);; Cellular Component: microtubule (GO:0005874);; Biological Process: microtubule-based process (GO:0007017);;	K07374|1.1e-11|tmu:101353946|K07374 tubulin alpha | (RefSeq) tubulin alpha-3 chain-like	Phagosome (ko04145);; Apoptosis (ko04210);; Tight junction (ko04530);; Gap junction (ko04540);; Alzheimer disease (ko05010);; Parkinson disease (ko05012);; Amyotrophic lateral sclerosis (ko05014);; Huntington disease (ko05016);; Prion disease (ko05020)	[Z]	Cytoskeleton	Tubulin/FtsZ family, GTPase domain	Tubulin alpha-3C chain OS=Homo sapiens OX=9606 GN=TUBA3C PE=1 SV=1	Z	Cytoskeleton	alpha tubulin-like, isoform CRA_a [Homo sapiens]	molecular function: catalytic activity (GO:0003824);; molecular function: binding (GO:0005488);; cellular component: cell (GO:0005623);; cellular component: organelle (GO:0043226);; cellular component: organelle part (GO:0044422);; cellular component: cell part (GO:0044464);; cellular component: supramolecular complex (GO:0099080);; biological process: cellular process (GO:0009987)
ENSG00000148180	GSN	254.903862	22121	302.155573	23599	281.926297	26924	176.207608	16808	185.035744	16111	218.403162	19678	4.11E-05	0.588841242	up	--	--	Molecular Function: calcium ion binding (GO:0005509);; Biological Process: actin nucleation (GO:0045010);; Biological Process: actin filament severing (GO:0051014);; Molecular Function: actin filament binding (GO:0051015);; Biological Process: barbed-end actin filament capping (GO:0051016);;	K05768|0.0e+00|hsa:2934|K05768 gelsolin | (RefSeq) GSN, ADF, AGEL; gelsolin	Fc gamma R-mediated phagocytosis (ko04666);; Regulation of actin cytoskeleton (ko04810);; Viral carcinogenesis (ko05203)	[Z]	Cytoskeleton	Gelsolin repeat	Gelsolin OS=Homo sapiens OX=9606 GN=GSN PE=1 SV=1	Z	Cytoskeleton	gelsolin isoform f [Homo sapiens]	molecular function: binding (GO:0005488);; biological process: cellular process (GO:0009987);; biological process: single-organism process (GO:0044699);; biological process: biological regulation (GO:0065007);; biological process: cellular component organization or biogenesis (GO:0071840)
ENSG00000171303	KCNK3	2.551261	584	2.296082	468	2.746057	692	1.594135	401	1.319663	301	2.120407	501	0.004666566	0.58828423	up	--	--	Molecular Function: open rectifier potassium channel activity (GO:0005252);; Cellular Component: integral component of membrane (GO:0016021);;	K04914|4.9e-206|hsa:3777|K04914 potassium channel subfamily K member 3 | (RefSeq) KCNK3, K2p3.1, OAT1, PPH4, TASK, TASK-1, TASK1, TBAK1; potassium two pore domain channel subfamily K member 3	Aldosterone synthesis and secretion (ko04925);; Cortisol synthesis and secretion (ko04927);; Cushing syndrome (ko04934)	[P]	Inorganic ion transport and metabolism	Ion channel	Potassium channel subfamily K member 3 OS=Homo sapiens OX=9606 GN=KCNK3 PE=1 SV=1	P	Inorganic ion transport and metabolism	potassium channel subfamily K member 3 [Pan paniscus]	biological process: cellular process (GO:0009987);; biological process: single-organism process (GO:0044699);; biological process: localization (GO:0051179);; biological process: biological regulation (GO:0065007);; molecular function: transporter activity (GO:0005215);; cellular component: membrane (GO:0016020);; cellular component: membrane part (GO:0044425)
ENSG00000188186	LAMTOR4	70.530924	1604	82.799001	1677	74.212916	1857	48.367054	1211	49.076661	1117	59.075487	1386	0.000123983	0.587542154	up	--	--	Biological Process: positive regulation of TOR signaling (GO:0032008);; Biological Process: cellular response to amino acid stimulus (GO:0071230);; Cellular Component: Ragulator complex (GO:0071986);;	K20399|1.4e-30|ggo:101128364|K20399 ragulator complex protein LAMTOR4 | (RefSeq) LAMTOR4; ragulator complex protein LAMTOR4 isoform X1	mTOR signaling pathway (ko04150)	--	--	--	Ragulator complex protein LAMTOR4 OS=Homo sapiens OX=9606 GN=LAMTOR4 PE=1 SV=1	U	Intracellular trafficking, secretion, and vesicular transport	LAMTOR4 isoform 6 [Pan troglodytes]	biological process: biological regulation (GO:0065007);; biological process: cellular process (GO:0009987);; biological process: response to stimulus (GO:0050896);; cellular component: cell (GO:0005623);; cellular component: membrane (GO:0016020);; cellular component: macromolecular complex (GO:0032991);; cellular component: organelle (GO:0043226);; cellular component: organelle part (GO:0044422)…
ENSG00000114631	PODXL2	39.52396	3206	40.013325	2893	36.998898	3304	22.647568	2019	26.577797	2148	31.038054	2600	0.000181144	0.586412319	up	--	--	Biological Process: immune system process (GO:0002376);; Molecular Function: molecular_function (GO:0003674);; Molecular Function: binding (GO:0005488);; Molecular Function: glycosaminoglycan binding (GO:0005539);; Cellular Component: cellular_component (GO:0005575);; Cellular Component: intracellular (GO:0005622);; Cellular Component: cell (GO:0005623);; Cellular Component: cytoplasm (GO:0005737…	K06818|0.0e+00|hsa:50512|K06818 podocalyxin-like 2 | (RefSeq) PODXL2, EG, PODLX2; podocalyxin like 2	--	--	--	CD34/Podocalyxin family	Podocalyxin-like protein 2 OS=Homo sapiens OX=9606 GN=PODXL2 PE=1 SV=1	U	Intracellular trafficking, secretion, and vesicular transport	podocalyxin-like protein 2 precursor [Homo sapiens]	biological process: immune system process (GO:0002376);; molecular function: binding (GO:0005488);; cellular component: cell (GO:0005623);; cellular component: cell part (GO:0044464);; cellular component: organelle (GO:0043226);; cellular component: membrane-enclosed lumen (GO:0031974);; cellular component: organelle part (GO:0044422);; cellular component: membrane (GO:0016020);; cellular compone…
