# Supplementary material for: Dalpiciclib partially abrogates ER signaling activation induced by pyrotinib in HER2+HR+ breast cancer
Source: eLife. 2023 Jan 5;12:e85246. doi: 10.7554/eLife.85246 (PMC9822241; doi:10.7554/eLife.85246)
Supplement: Figure 3—source data 4. [file elife-85246-fig3-data4.xls]

#ID	gene_name	C1_FPKM	C1_count	C2_FPKM	C2_count	C3_FPKM	C3_count	Ctrl1_FPKM	Ctrl1_count	Ctrl2_FPKM	Ctrl2_count	Ctrl3_FPKM	Ctrl3_count	Pvalue	log2FC	regulated	COG_class	COG_class_annotation	GO_annotation	KEGG_annotation	KEGG_pathway_annotation	KOG_class	KOG_class_annotation	Pfam_annotation	Swiss_Prot_annotation	eggNOG_class	eggNOG_class_annotation	NR_annotation	GO_second_level_annotation
ENSG00000007968	E2F2	0.466814	114	0.662285	126	0.340357	62	6.230455	1319	6.598837	1267	7.447159	1482	6.43E-56	-3.718834379	down	--	--	Molecular Function: DNA binding (GO:0003677);; Molecular Function: transcription factor activity, sequence-specific DNA binding (GO:0003700);; Cellular Component: nucleus (GO:0005634);; Cellular Component: transcription factor complex (GO:0005667);; Molecular Function: protein dimerization activity (GO:0046983);;	K09389|1.2e-240|hsa:1870|K09389 transcription factor E2F2 | (RefSeq) E2F2, E2F-2; E2F transcription factor 2	Endocrine resistance (ko01522);; Cell cycle (ko04110);; Cellular senescence (ko04218);; Cushing syndrome (ko04934);; Hepatitis C (ko05160);; Hepatitis B (ko05161);; Human cytomegalovirus infection (ko05163);; Human T-cell leukemia virus 1 infection (ko05166);; Kaposi sarcoma-associated herpesvirus infection (ko05167);; Epstein-Barr virus infection (ko05169);; Pathways in cancer (ko05200);; MicroR…	[K]	Transcription	E2F transcription factor CC-MB domain	Transcription factor E2F2 OS=Homo sapiens OX=9606 GN=E2F2 PE=1 SV=1	K	Transcription	transcription factor E2F2 [Homo sapiens]	molecular function: binding (GO:0005488);; biological process: biological regulation (GO:0065007);; molecular function: nucleic acid binding transcription factor activity (GO:0001071);; cellular component: cell (GO:0005623);; cellular component: organelle (GO:0043226);; cellular component: cell part (GO:0044464);; cellular component: macromolecular complex (GO:0032991)
ENSG00000093009	CDC45	1.733126	158	1.980596	151	1.384091	100	22.321292	1656	23.402895	1710	23.472398	1736	9.30E-83	-3.691855762	down	--	--	Biological Process: DNA replication initiation (GO:0006270);;	K06628|0.0e+00|hsa:8318|K06628 cell division control protein 45 | (RefSeq) CDC45, CDC45L, CDC45L2, MGORS7, PORC-PI-1; cell division cycle 45	Cell cycle (ko04110)	[L]	Replication, recombination and repair	CDC45-like protein	Cell division control protein 45 homolog OS=Homo sapiens OX=9606 GN=CDC45 PE=1 SV=1	L	Replication, recombination and repair	cell division control protein 45 homolog isoform 2 [Homo sapiens]	biological process: metabolic process (GO:0008152);; biological process: cellular process (GO:0009987)
ENSG00000085840	ORC1	0.41275	62	0.554552	64	0.22515	25	4.711228	604	4.780903	556	4.456434	538	1.54E-37	-3.411323227	down	[L]	Replication, recombination and repair	Molecular Function: DNA binding (GO:0003677);; Molecular Function: chromatin binding (GO:0003682);; Molecular Function: ATP binding (GO:0005524);; Cellular Component: nucleus (GO:0005634);; Biological Process: DNA replication (GO:0006260);;	K02603|0.0e+00|hsa:4998|K02603 origin recognition complex subunit 1 | (RefSeq) ORC1, HSORC1, ORC1L, PARC1; origin recognition complex subunit 1	Cell cycle (ko04110)	[L]	Replication, recombination and repair	BAH domain	Origin recognition complex subunit 1 OS=Homo sapiens OX=9606 GN=ORC1 PE=1 SV=2	L	Replication, recombination and repair	origin recognition complex subunit 1 isoform 1 [Homo sapiens]	molecular function: binding (GO:0005488);; cellular component: cell (GO:0005623);; cellular component: organelle (GO:0043226);; cellular component: cell part (GO:0044464);; biological process: metabolic process (GO:0008152);; biological process: cellular process (GO:0009987)
ENSG00000176890	TYMS	6.207595	475	8.501076	513	5.796155	337	62.474975	4202	76.50394	4627	75.470274	4742	9.37E-70	-3.4099144	down	[F]	Nucleotide transport and metabolism	Molecular Function: nucleotide binding (GO:0000166);; Molecular Function: mRNA binding (GO:0003729);; Molecular Function: thymidylate synthase activity (GO:0004799);; Molecular Function: folic acid binding (GO:0005542);; Cellular Component: nucleolus (GO:0005730);; Cellular Component: mitochondrion (GO:0005739);; Biological Process: dTMP biosynthetic process (GO:0006231);; Biological Process: reg…	K00560|5.3e-187|hsa:7298|K00560 thymidylate synthase [EC:2.1.1.45] | (RefSeq) TYMS, HST422, TMS, TS; thymidylate synthetase	Pyrimidine metabolism (ko00240);; One carbon pool by folate (ko00670);; Antifolate resistance (ko01523)	[F]	Nucleotide transport and metabolism	Thymidylate synthase	Thymidylate synthase OS=Homo sapiens OX=9606 GN=TYMS PE=1 SV=3	F	Nucleotide transport and metabolism	thymidylate synthase isoform 1 [Homo sapiens]	molecular function: binding (GO:0005488);; biological process: metabolic process (GO:0008152);; molecular function: catalytic activity (GO:0003824);; cellular component: cell (GO:0005623);; cellular component: organelle (GO:0043226);; cellular component: organelle part (GO:0044422);; cellular component: cell part (GO:0044464);; biological process: cellular process (GO:0009987);; biological proces…
ENSG00000167900	TK1	6.503829	492	8.102131	486	7.360176	425	66.718157	4374	69.082574	4075	89.06873	5490	3.17E-66	-3.360654252	down	[F]	Nucleotide transport and metabolism	Molecular Function: thymidine kinase activity (GO:0004797);; Molecular Function: ATP binding (GO:0005524);; Biological Process: DNA biosynthetic process (GO:0071897);;	K00857|1.2e-126|hsa:7083|K00857 thymidine kinase [EC:2.7.1.21] | (RefSeq) TK1, TK2; thymidine kinase 1	Pyrimidine metabolism (ko00240);; Drug metabolism - other enzymes (ko00983)	[F]	Nucleotide transport and metabolism	Thymidine kinase	Thymidine kinase, cytosolic OS=Homo sapiens OX=9606 GN=TK1 PE=1 SV=2	F	Nucleotide transport and metabolism	thymidine kinase, cytosolic isoform 3 [Homo sapiens]	biological process: metabolic process (GO:0008152);; biological process: cellular process (GO:0009987);; biological process: single-organism process (GO:0044699);; molecular function: catalytic activity (GO:0003824);; molecular function: binding (GO:0005488)
ENSG00000171848	RRM2	3.083889	496	4.076898	498	2.556596	299	31.512572	4432	36.587415	4438	29.093069	3803	3.30E-70	-3.355240076	down	[F]	Nucleotide transport and metabolism	Biological Process: deoxyribonucleotide biosynthetic process (GO:0009263);; Molecular Function: oxidoreductase activity (GO:0016491);;	K10808|5.2e-252|pps:100991344|K10808 ribonucleoside-diphosphate reductase subunit M2 [EC:1.17.4.1] | (RefSeq) RRM2; ribonucleotide reductase regulatory subunit M2	Purine metabolism (ko00230);; Pyrimidine metabolism (ko00240);; Glutathione metabolism (ko00480);; Drug metabolism - other enzymes (ko00983);; p53 signaling pathway (ko04115)	[F]	Nucleotide transport and metabolism	Ribonucleotide reductase, small chain	Ribonucleoside-diphosphate reductase subunit M2 OS=Homo sapiens OX=9606 GN=RRM2 PE=1 SV=1	F	Nucleotide transport and metabolism	ribonucleoside-diphosphate reductase subunit M2 isoform 1 [Homo sapiens]	biological process: metabolic process (GO:0008152);; biological process: cellular process (GO:0009987);; biological process: single-organism process (GO:0044699);; molecular function: catalytic activity (GO:0003824)
ENSG00000166803	PCLAF	1.501532	126	1.67502	122	1.477131	109	17.066806	1273	20.021282	1139	13.395875	1007	2.43E-74	-3.317431166	down	--	--	Cellular Component: centrosome (GO:0005813);; Biological Process: cellular response to DNA damage stimulus (GO:0006974);; Biological Process: regulation of cell cycle (GO:0051726);;	--	--	--	--	PCNA-associated factor histone like domain	PCNA-associated factor OS=Homo sapiens OX=9606 GN=PCLAF PE=1 SV=1	L	Replication, recombination and repair	PCNA-associated factor isoform 1 [Homo sapiens]	cellular component: cell (GO:0005623);; cellular component: organelle (GO:0043226);; cellular component: organelle part (GO:0044422);; cellular component: cell part (GO:0044464);; biological process: cellular process (GO:0009987);; biological process: response to stimulus (GO:0050896);; biological process: biological regulation (GO:0065007)
ENSG00000101057	MYBL2	3.325412	410	4.705573	455	4.051614	377	34.088321	3674	35.144697	3434	43.388444	4391	4.96E-60	-3.250385782	down	--	--	Biological Process: microtubule cytoskeleton organization (GO:0000226);; Biological Process: mitotic cell cycle (GO:0000278);; Biological Process: nuclear division (GO:0000280);; Molecular Function: transcription regulatory region sequence-specific DNA binding (GO:0000976);; Molecular Function: RNA polymerase II regulatory region sequence-specific DNA binding (GO:0000977);; Molecular Function: RN…	K21769|0.0e+00|hsa:4605|K21769 myb-related protein B | (RefSeq) MYBL2, B-MYB, BMYB; MYB proto-oncogene like 2	Cellular senescence (ko04218)	--	--	C-myb, C-terminal	Myb-related protein B OS=Homo sapiens OX=9606 GN=MYBL2 PE=1 SV=1	K	Transcription	myb-related protein B isoform 2 [Homo sapiens]	biological process: cellular process (GO:0009987);; biological process: cellular component organization or biogenesis (GO:0071840);; biological process: single-organism process (GO:0044699);; molecular function: binding (GO:0005488);; biological process: biological regulation (GO:0065007);; molecular function: nucleic acid binding transcription factor activity (GO:0001071);; molecular function: t…
ENSG00000100206	DMC1	0.041867	5	0.063893	6	0	0	1.029059	94	0.865125	67	0.711034	58	4.77E-13	-3.204274613	down	[L]	Replication, recombination and repair	Molecular Function: nucleotide binding (GO:0000166);;	K10872|2.1e-189|csab:103223317|K10872 meiotic recombination protein DMC1 | (RefSeq) DMC1; DNA meiotic recombinase 1	--	[DL]	Cell cycle control, cell division, chromosome partitioning;; Replication, recombination and repair	Rad51	Meiotic recombination protein DMC1/LIM15 homolog OS=Homo sapiens OX=9606 GN=DMC1 PE=1 SV=2	--	--	meiotic recombination protein DMC1/LIM15 homolog isoform 1 [Homo sapiens]	molecular function: binding (GO:0005488)
ENSG00000143476	DTL	0.344189	74	0.697946	117	0.309617	50	5.534878	1032	5.119742	867	3.323124	582	1.33E-28	-3.202471028	down	--	--	Cellular Component: nucleoplasm (GO:0005654);; Cellular Component: nucleolus (GO:0005730);; Cellular Component: cytosol (GO:0005829);;	K11790|0.0e+00|hsa:51514|K11790 denticleless | (RefSeq) DTL, CDT2, DCAF2, L2DTL, RAMP; denticleless E3 ubiquitin protein ligase homolog	--	[S]	Function unknown	WD domain, G-beta repeat	Denticleless protein homolog OS=Homo sapiens OX=9606 GN=DTL PE=1 SV=3	S	Function unknown	denticleless protein homolog isoform 1 [Homo sapiens]	cellular component: cell (GO:0005623);; cellular component: organelle (GO:0043226);; cellular component: organelle part (GO:0044422);; cellular component: cell part (GO:0044464)
ENSG00000165244	ZNF367	0.162768	28	0.601971	81	0.183556	24	4.097118	610	4.609466	622	2.644207	370	1.78E-18	-3.159515531	down	--	--	Molecular Function: molecular_function (GO:0003674);; Molecular Function: nucleic acid binding (GO:0003676);; Molecular Function: transcription factor activity, sequence-specific DNA binding (GO:0003700);; Cellular Component: cellular_component (GO:0005575);; Cellular Component: intracellular (GO:0005622);; Cellular Component: cell (GO:0005623);; Cellular Component: nucleus (GO:0005634);; Cellula…	K15281|2.8e-43|acyg:106047340|K15281 solute carrier family 35 | (RefSeq) UDP-N-acetylglucosamine/UDP-glucose/GDP-mannose transporter-like	--	--	--	Zinc-finger double domain	Zinc finger protein 367 OS=Homo sapiens OX=9606 GN=ZNF367 PE=1 SV=1	K	Transcription	zinc finger protein 367 [Homo sapiens]	molecular function: binding (GO:0005488);; biological process: biological regulation (GO:0065007);; molecular function: nucleic acid binding transcription factor activity (GO:0001071);; cellular component: cell (GO:0005623);; cellular component: cell part (GO:0044464);; cellular component: organelle (GO:0043226);; cellular component: organelle part (GO:0044422);; cellular component: membrane-encl…
ENSG00000174871	CNIH2	1.638128	105	1.108562	56	1.345414	64	11.216076	602	11.765034	585	15.486363	798	6.80E-37	-3.144334351	down	--	--	Cellular Component: integral component of membrane (GO:0016021);; Biological Process: vesicle-mediated transport (GO:0016192);;	K20368|9.1e-84|mcf:102135089|K20368 protein cornichon | (RefSeq) CNIH2; cornichon family AMPA receptor auxiliary protein 2	--	[OUT]	Posttranslational modification, protein turnover, chaperones;; Intracellular trafficking, secretion, and vesicular transport;; Signal transduction mechanisms	Cornichon protein	Protein cornichon homolog 2 OS=Homo sapiens OX=9606 GN=CNIH2 PE=1 SV=1	--	--	PREDICTED: protein cornichon homolog 2 isoform X1 [Macaca fascicularis]	cellular component: membrane (GO:0016020);; cellular component: membrane part (GO:0044425);; biological process: localization (GO:0051179)
ENSG00000276043	UHRF1	2.390825	352	3.846961	533	2.441193	305	23.110892	3647	22.85501	3296	23.289495	3546	2.34E-41	-3.118922695	down	[V]	Defense mechanisms	Biological Process: negative regulation of transcription from RNA polymerase II promoter (GO:0000122);; Cellular Component: nucleoplasm (GO:0005654);; Cellular Component: replication fork (GO:0005657);; Cellular Component: nuclear heterochromatin (GO:0005720);; Biological Process: maintenance of DNA methylation (GO:0010216);; Biological Process: histone monoubiquitination (GO:0010390);; Cellular …	K10638|0.0e+00|hsa:29128|K10638 E3 ubiquitin-protein ligase UHRF1 [EC:2.3.2.27] | (RefSeq) UHRF1, ICBP90, Np95, RNF106, TDRD22, hNP95, hUHRF1, huNp95; ubiquitin like with PHD and ring finger domains 1	--	--	--	Tandem tudor domain within UHRF1	E3 ubiquitin-protein ligase UHRF1 OS=Homo sapiens OX=9606 GN=UHRF1 PE=1 SV=1	B	Chromatin structure and dynamics	Ubiquitin-like with PHD and ring finger domains 1 [Homo sapiens]	biological process: biological regulation (GO:0065007);; cellular component: cell (GO:0005623);; cellular component: organelle (GO:0043226);; cellular component: organelle part (GO:0044422);; cellular component: cell part (GO:0044464);; cellular component: membrane-enclosed lumen (GO:0031974);; biological process: metabolic process (GO:0008152);; biological process: cellular process (GO:0009987);…
ENSG00000105011	ASF1B	3.69451	342	4.838611	361	4.006682	287	29.014025	2433	32.325852	2443	38.467437	2997	8.86E-54	-3.048758862	down	--	--	Cellular Component: chromatin (GO:0000785);; Biological Process: blastocyst hatching (GO:0001835);; Cellular Component: nucleoplasm (GO:0005654);; Biological Process: nucleosome assembly (GO:0006334);; Molecular Function: histone binding (GO:0042393);;	K10753|8.3e-117|hsa:55723|K10753 histone chaperone ASF1 | (RefSeq) ASF1B, CIA-II; anti-silencing function 1B histone chaperone	--	[KB]	Transcription;; Chromatin structure and dynamics	ASF1 like histone chaperone	Histone chaperone ASF1B OS=Homo sapiens OX=9606 GN=ASF1B PE=1 SV=1	B	Chromatin structure and dynamics	histone chaperone ASF1B [Homo sapiens]	cellular component: cell (GO:0005623);; cellular component: organelle (GO:0043226);; cellular component: organelle part (GO:0044422);; cellular component: cell part (GO:0044464);; biological process: multicellular organismal process (GO:0032501);; biological process: developmental process (GO:0032502);; biological process: single-organism process (GO:0044699);; biological process: cellular proces…
ENSG00000167513	CDT1	1.803523	273	2.435695	289	1.871982	213	15.753449	2081	14.676207	1758	18.835127	2339	1.67E-51	-3.046223286	down	--	--	Biological Process: mitotic sister chromatid segregation (GO:0000070);; Biological Process: cell cycle checkpoint (GO:0000075);; Biological Process: DNA replication checkpoint (GO:0000076);; Biological Process: G1/S transition of mitotic cell cycle (GO:0000082);; Biological Process: regulation of transcription involved in G1/S transition of mitotic cell cycle (GO:0000083);; Biological Process: mi…	K10727|3.4e-290|hsa:81620|K10727 chromatin licensing and DNA replication factor 1 | (RefSeq) CDT1, DUP, RIS2; chromatin licensing and DNA replication factor 1	--	[L]	Replication, recombination and repair	DNA replication factor CDT1 like	DNA replication factor Cdt1 OS=Homo sapiens OX=9606 GN=CDT1 PE=1 SV=3	L	Replication, recombination and repair	DNA replication factor Cdt1 [Homo sapiens]	biological process: cellular process (GO:0009987);; biological process: single-organism process (GO:0044699);; biological process: cellular component organization or biogenesis (GO:0071840);; biological process: biological regulation (GO:0065007);; molecular function: binding (GO:0005488);; cellular component: cell (GO:0005623);; cellular component: cell part (GO:0044464);; cellular component: or…
ENSG00000101412	E2F1	1.315361	154	1.089206	100	1.179868	104	8.764318	895	9.154326	847	10.927735	1049	9.67E-49	-3.030178781	down	--	--	Biological Process: reproduction (GO:0000003);; Biological Process: cell cycle checkpoint (GO:0000075);; Biological Process: DNA damage checkpoint (GO:0000077);; Biological Process: G1/S transition of mitotic cell cycle (GO:0000082);; Biological Process: regulation of transcription involved in G1/S transition of mitotic cell cycle (GO:0000083);; Biological Process: negative regulation of transcri…	K17454|5.4e-230|hsa:1869|K17454 transcription factor E2F1 | (RefSeq) E2F1, E2F-1, RBAP1, RBBP3, RBP3; E2F transcription factor 1	Endocrine resistance (ko01522);; Cell cycle (ko04110);; Mitophagy - animal (ko04137);; Cellular senescence (ko04218);; Cushing syndrome (ko04934);; Hepatitis C (ko05160);; Hepatitis B (ko05161);; Human cytomegalovirus infection (ko05163);; Human papillomavirus infection (ko05165);; Human T-cell leukemia virus 1 infection (ko05166);; Kaposi sarcoma-associated herpesvirus infection (ko05167);; Epst…	[K]	Transcription	E2F transcription factor CC-MB domain	Transcription factor E2F1 OS=Homo sapiens OX=9606 GN=E2F1 PE=1 SV=1	K	Transcription	transcription factor E2F1 [Homo sapiens]	biological process: reproduction (GO:0000003);; biological process: cellular process (GO:0009987);; biological process: biological regulation (GO:0065007);; biological process: response to stimulus (GO:0050896);; biological process: single-organism process (GO:0044699);; cellular component: cell (GO:0005623);; cellular component: organelle (GO:0043226);; cellular component: organelle part (GO:004…
ENSG00000153044	CENPH	1.604331	105	2.031138	102	1.400851	69	13.643526	765	12.52588	635	13.694938	724	4.90E-46	-2.990342962	down	--	--	Cellular Component: kinetochore (GO:0000776);; Cellular Component: nucleoplasm (GO:0005654);; Cellular Component: nucleolus (GO:0005730);; Molecular Function: kinetochore binding (GO:0043515);; Biological Process: kinetochore assembly (GO:0051382);;	K11500|8.0e-122|hsa:64946|K11500 centromere protein H | (RefSeq) CENPH; centromere protein H	--	--	--	Centromere protein H (CENP-H)	Centromere protein H OS=Homo sapiens OX=9606 GN=CENPH PE=1 SV=1	S	Function unknown	centromere protein H [Homo sapiens]	cellular component: cell (GO:0005623);; cellular component: macromolecular complex (GO:0032991);; cellular component: organelle (GO:0043226);; cellular component: organelle part (GO:0044422);; cellular component: cell part (GO:0044464);; molecular function: binding (GO:0005488);; biological process: cellular process (GO:0009987);; biological process: cellular component organization or biogenesis …
ENSG00000100297	MCM5	3.674935	600	5.520282	699	3.61613	442	29.281524	4188	29.440793	3828	36.498548	4911	4.47E-44	-2.936194742	down	[L]	Replication, recombination and repair	Molecular Function: DNA helicase activity (GO:0003678);; Molecular Function: DNA replication origin binding (GO:0003688);; Molecular Function: ATP binding (GO:0005524);; Cellular Component: nucleoplasm (GO:0005654);; Biological Process: DNA replication initiation (GO:0006270);; Cellular Component: MCM complex (GO:0042555);; Biological Process: cell division (GO:0051301);;	K02209|0.0e+00|hsa:4174|K02209 DNA replication licensing factor MCM5 [EC:3.6.4.12] | (RefSeq) MCM5, CDC46, MGORS8, P1-CDC46; minichromosome maintenance complex component 5	DNA replication (ko03030);; Cell cycle (ko04110)	[L]	Replication, recombination and repair	MCM P-loop domain	DNA replication licensing factor MCM5 OS=Homo sapiens OX=9606 GN=MCM5 PE=1 SV=5	L	Replication, recombination and repair	DNA replication licensing factor MCM5 [Homo sapiens]	molecular function: catalytic activity (GO:0003824);; molecular function: binding (GO:0005488);; cellular component: cell (GO:0005623);; cellular component: organelle (GO:0043226);; cellular component: organelle part (GO:0044422);; cellular component: cell part (GO:0044464);; biological process: metabolic process (GO:0008152);; biological process: cellular process (GO:0009987);; cellular componen…
ENSG00000051180	RAD51	1.904412	207	2.612959	218	2.428269	176	18.934116	1506	15.760809	1335	20.294884	1464	2.54E-57	-2.91473031	down	[L]	Replication, recombination and repair	Molecular Function: recombinase activity (GO:0000150);; Biological Process: double-strand break repair via homologous recombination (GO:0000724);; Molecular Function: double-stranded DNA binding (GO:0003690);; Molecular Function: single-stranded DNA binding (GO:0003697);; Molecular Function: ATP binding (GO:0005524);; Cellular Component: nucleus (GO:0005634);; Molecular Function: DNA-dependent AT…	K04482|1.8e-188|csab:103245812|K04482 DNA repair protein RAD51 | (RefSeq) RAD51; RAD51 recombinase	Homologous recombination (ko03440);; Fanconi anemia pathway (ko03460);; Pathways in cancer (ko05200);; Pancreatic cancer (ko05212)	[L]	Replication, recombination and repair	Rad51	DNA repair protein RAD51 homolog 1 OS=Homo sapiens OX=9606 GN=RAD51 PE=1 SV=1	L	Replication, recombination and repair	DNA repair protein RAD51 homolog 1 isoform 1 [Homo sapiens]	molecular function: catalytic activity (GO:0003824);; biological process: metabolic process (GO:0008152);; biological process: cellular process (GO:0009987);; biological process: response to stimulus (GO:0050896);; molecular function: binding (GO:0005488);; cellular component: cell (GO:0005623);; cellular component: organelle (GO:0043226);; cellular component: cell part (GO:0044464);; biological …
ENSG00000092470	WDR76	0.680726	122	1.315346	192	0.565419	79	8.120311	1149	8.679674	1140	5.467642	759	8.56E-24	-2.849054729	down	--	--	Biological Process: cellular response to DNA damage stimulus (GO:0006974);;	K10140|1.8e-08|xtr:493565|K10140 DNA damage-binding protein 2 | (RefSeq) ddb2; DNA damage-binding protein 2	Nucleotide excision repair (ko03420);; p53 signaling pathway (ko04115);; Ubiquitin mediated proteolysis (ko04120)	[S]	Function unknown	--	WD repeat-containing protein 76 OS=Homo sapiens OX=9606 GN=WDR76 PE=1 SV=2	S	Function unknown	WD repeat-containing protein 76 isoform 1 [Homo sapiens]	biological process: cellular process (GO:0009987);; biological process: response to stimulus (GO:0050896)
ENSG00000175785	PRIMA1	0.266439	46	0.354119	49	0.135242	18	2.065838	311	1.859588	256	2.279182	304	7.57E-21	-2.832077654	down	--	--	Cellular Component: integral component of membrane (GO:0016021);;	--	--	--	--	Proline-rich membrane anchor 1	Proline-rich membrane anchor 1 OS=Homo sapiens OX=9606 GN=PRIMA1 PE=1 SV=2	U	Intracellular trafficking, secretion, and vesicular transport	proline-rich membrane anchor 1 precursor [Homo sapiens]	cellular component: membrane (GO:0016020);; cellular component: membrane part (GO:0044425)
ENSG00000073111	MCM2	7.288577	1232	8.869859	1165	7.398115	938	50.492218	7373	46.537775	6229	60.933299	8375	3.14E-54	-2.811559882	down	[L]	Replication, recombination and repair	Molecular Function: DNA binding (GO:0003677);; Molecular Function: DNA helicase activity (GO:0003678);; Molecular Function: ATP binding (GO:0005524);; Cellular Component: nucleus (GO:0005634);; Biological Process: DNA replication initiation (GO:0006270);; Cellular Component: MCM complex (GO:0042555);; Biological Process: negative regulation of DNA helicase activity (GO:1905775);;	K02540|0.0e+00|hsa:4171|K02540 DNA replication licensing factor MCM2 [EC:3.6.4.12] | (RefSeq) MCM2, BM28, CCNL1, CDCL1, D3S3194, DFNA70, MITOTIN, cdc19; minichromosome maintenance complex component 2	DNA replication (ko03030);; Cell cycle (ko04110)	[L]	Replication, recombination and repair	MCM P-loop domain	DNA replication licensing factor MCM2 OS=Homo sapiens OX=9606 GN=MCM2 PE=1 SV=4	L	Replication, recombination and repair	DNA replication licensing factor MCM2 [Homo sapiens]	molecular function: binding (GO:0005488);; molecular function: catalytic activity (GO:0003824);; cellular component: cell (GO:0005623);; cellular component: organelle (GO:0043226);; cellular component: cell part (GO:0044464);; biological process: metabolic process (GO:0008152);; biological process: cellular process (GO:0009987);; cellular component: macromolecular complex (GO:0032991);; biologica…
ENSG00000127564	PKMYT1	7.57341	684	11.294698	777	6.187911	471	56.556811	4315	59.419218	3881	64.942028	4653	1.45E-42	-2.79404628	down	[R]	General function prediction only	Molecular Function: protein kinase activity (GO:0004672);; Molecular Function: ATP binding (GO:0005524);;	K06633|2.2e-263|hsa:9088|K06633 membrane-associated tyrosine- and threonine-specific cdc2-inhibitory kinase [EC:2.7.11.1] | (RefSeq) PKMYT1, MYT1, PPP1R126; protein kinase, membrane associated tyrosine/threonine 1	Cell cycle (ko04110);; Oocyte meiosis (ko04114);; Progesterone-mediated oocyte maturation (ko04914)	[D]	Cell cycle control, cell division, chromosome partitioning	Protein kinase domain	Membrane-associated tyrosine- and threonine-specific cdc2-inhibitory kinase OS=Homo sapiens OX=9606 GN=PKMYT1 PE=1 SV=1	D	Cell cycle control, cell division, chromosome partitioning	unnamed protein product [Homo sapiens]	biological process: metabolic process (GO:0008152);; biological process: cellular process (GO:0009987);; molecular function: catalytic activity (GO:0003824);; molecular function: binding (GO:0005488)
ENSG00000111665	CDCA3	1.947275	178	2.452077	163	1.980505	121	14.378397	1031	13.513914	822	17.98841	1103	5.51E-40	-2.743766185	down	--	--	Cellular Component: cellular_component (GO:0005575);; Cellular Component: cell-cell junction (GO:0005911);; Cellular Component: adherens junction (GO:0005912);; Cellular Component: cell-cell adherens junction (GO:0005913);; Cellular Component: cell junction (GO:0030054);; Cellular Component: anchoring junction (GO:0070161);;	--	--	--	--	--	Cell division cycle-associated protein 3 OS=Homo sapiens OX=9606 GN=CDCA3 PE=1 SV=1	S	Function unknown	cell division cycle-associated protein 3 isoform 3 [Homo sapiens]	cellular component: cell junction (GO:0030054)
ENSG00000161888	SPC24	0.550408	60	0.883456	73	0.312318	26	6.374374	531	11.147182	300	12.287542	340	4.07E-18	-2.725893637	down	--	--	Cellular Component: chromosome, centromeric region (GO:0000775);; Cellular Component: kinetochore (GO:0000776);; Cellular Component: cellular_component (GO:0005575);; Cellular Component: intracellular (GO:0005622);; Cellular Component: cell (GO:0005623);; Cellular Component: nucleus (GO:0005634);; Cellular Component: chromosome (GO:0005694);; Cellular Component: nucleolus (GO:0005730);; Cellular …	K11549|1.1e-100|ggo:101145567|K11549 kinetochore protein Spc24, animal type | (RefSeq) SPC24; kinetochore protein Spc24 isoform X2	--	--	--	Spc24 subunit of Ndc80	Kinetochore protein Spc24 OS=Homo sapiens OX=9606 GN=SPC24 PE=1 SV=2	S	Function unknown	kinetochore protein Spc24 isoform 1 [Homo sapiens]	cellular component: cell (GO:0005623);; cellular component: organelle (GO:0043226);; cellular component: organelle part (GO:0044422);; cellular component: cell part (GO:0044464);; cellular component: macromolecular complex (GO:0032991);; cellular component: membrane-enclosed lumen (GO:0031974)
ENSG00000152253	SPC25	1.074539	68	1.987552	99	1.624648	77	9.932037	549	10.008823	501	10.641073	553	2.34E-27	-2.688756213	down	--	--	Cellular Component: cytosol (GO:0005829);;	K11550|2.4e-117|hsa:57405|K11550 kinetochore protein Spc25, animal type | (RefSeq) SPC25, AD024, SPBC25, hSpc25; SPC25 component of NDC80 kinetochore complex	--	[S]	Function unknown	Chromosome segregation protein Spc25	Kinetochore protein Spc25 OS=Homo sapiens OX=9606 GN=SPC25 PE=1 SV=1	S	Function unknown	kinetochore protein Spc25 [Homo sapiens]	cellular component: cell (GO:0005623);; cellular component: cell part (GO:0044464)
ENSG00000178999	AURKB	4.31756	234	6.531578	276	5.115806	200	30.276557	1441	28.908085	1257	38.961045	1703	4.07E-34	-2.670551695	down	[M]	Cell wall/membrane/envelope biogenesis	Molecular Function: protein serine/threonine kinase activity (GO:0004674);; Molecular Function: ATP binding (GO:0005524);; Biological Process: mitotic spindle assembly checkpoint (GO:0007094);; Cellular Component: chromosome passenger complex (GO:0032133);; Biological Process: positive regulation of cytokinesis (GO:0032467);; Biological Process: histone H3-S28 phosphorylation (GO:0043988);;	K11479|9.6e-198|hsa:9212|K11479 aurora kinase B [EC:2.7.11.1] | (RefSeq) AURKB, AIK2, AIM-1, AIM1, ARK-2, ARK2, AurB, IPL1, PPP1R48, STK-1, STK12, STK5, aurkb-sv1, aurkb-sv2; aurora kinase B	--	[D]	Cell cycle control, cell division, chromosome partitioning	Protein kinase domain	Aurora kinase B OS=Homo sapiens OX=9606 GN=AURKB PE=1 SV=3	D	Cell cycle control, cell division, chromosome partitioning	aurora kinase B isoform 3 [Homo sapiens]	biological process: metabolic process (GO:0008152);; biological process: cellular process (GO:0009987);; molecular function: catalytic activity (GO:0003824);; molecular function: binding (GO:0005488);; biological process: single-organism process (GO:0044699);; biological process: biological regulation (GO:0065007);; cellular component: cell (GO:0005623);; cellular component: macromolecular comple…
Homo_sapiens_newGene_9096	--	0.421921	65	0.297802	36	0.281217	33	4.680115	402	2.085743	252	1.794176	225	1.94E-20	-2.653474539	down	--	--	--	--	--	--	--	--	--	--	--	--	--
ENSG00000174371	EXO1	0.976681	148	2.48637	283	1.291643	139	11.797134	1542	11.174749	1342	7.451585	934	3.79E-20	-2.629497245	down	[L]	Replication, recombination and repair	Molecular Function: DNA binding (GO:0003677);; Cellular Component: nucleus (GO:0005634);; Biological Process: DNA repair (GO:0006281);; Molecular Function: 5'-3' exodeoxyribonuclease activity (GO:0035312);;	K10746|0.0e+00|hsa:9156|K10746 exonuclease 1 [EC:3.1.-.-] | (RefSeq) EXO1, HEX1, hExoI; exonuclease 1	Mismatch repair (ko03430)	[L]	Replication, recombination and repair	XPG I-region	Exonuclease 1 OS=Homo sapiens OX=9606 GN=EXO1 PE=1 SV=2	L	Replication, recombination and repair	exonuclease 1 isoform b [Homo sapiens]	molecular function: binding (GO:0005488);; cellular component: cell (GO:0005623);; cellular component: organelle (GO:0043226);; cellular component: cell part (GO:0044464);; biological process: metabolic process (GO:0008152);; biological process: cellular process (GO:0009987);; biological process: response to stimulus (GO:0050896);; molecular function: catalytic activity (GO:0003824)
ENSG00000065328	MCM10	0.658683	142	0.958956	160	0.603407	96	6.514673	1138	5.446405	865	3.612724	538	1.69E-23	-2.628739993	down	--	--	Molecular Function: double-stranded DNA binding (GO:0003690);; Molecular Function: single-stranded DNA binding (GO:0003697);; Cellular Component: nucleoplasm (GO:0005654);; Cellular Component: nucleolus (GO:0005730);; Biological Process: DNA replication initiation (GO:0006270);;	K10736|0.0e+00|hsa:55388|K10736 minichromosome maintenance protein 10 | (RefSeq) MCM10, CNA43, DNA43, PRO2249; minichromosome maintenance 10 replication initiation factor	--	[D]	Cell cycle control, cell division, chromosome partitioning	Mcm10 replication factor	Protein MCM10 homolog OS=Homo sapiens OX=9606 GN=MCM10 PE=1 SV=2	D	Cell cycle control, cell division, chromosome partitioning	MCM10 minichromosome maintenance deficient 10 (S. cerevisiae), isoform CRA_b [Homo sapiens]	molecular function: binding (GO:0005488);; cellular component: cell (GO:0005623);; cellular component: organelle (GO:0043226);; cellular component: organelle part (GO:0044422);; cellular component: cell part (GO:0044464);; biological process: metabolic process (GO:0008152);; biological process: cellular process (GO:0009987)
ENSG00000128408	RIBC2	0.294832	21	0.731062	40	0.14499	8	3.860894	233	2.458014	135	3.531655	201	1.52E-11	-2.623472985	down	--	--	--	--	--	--	--	RIB43A	RIB43A-like with coiled-coils protein 2 OS=Homo sapiens OX=9606 GN=RIBC2 PE=1 SV=2	S	Function unknown	RIB43A-like with coiled-coils protein 2 [Homo sapiens]	--
ENSG00000137310	TCF19	1.619377	242	2.353575	267	1.621096	174	10.442298	1336	11.522261	1353	10.585583	1274	1.52E-40	-2.61193083	down	--	--	Molecular Function: transcription factor activity, sequence-specific DNA binding (GO:0003700);; Molecular Function: metal ion binding (GO:0046872);;	K11446|6.4e-08|isc:IscW_ISCW013765|K11446 [histone H3]-trimethyl-L-lysine4 demethylase [EC:1.14.11.67] | (RefSeq) Jumonji/ARID domain-containing protein, putative	--	--	--	FHA domain	Transcription factor 19 OS=Homo sapiens OX=9606 GN=TCF19 PE=1 SV=2	K	Transcription	transcription factor 19 [Homo sapiens]	biological process: biological regulation (GO:0065007);; molecular function: nucleic acid binding transcription factor activity (GO:0001071);; molecular function: binding (GO:0005488)
ENSG00000132646	PCNA	40.270306	2530	43.979028	2163	43.547315	2050	239.936848	13151	251.637099	12504	223.454656	11513	1.37E-88	-2.598167995	down	[L]	Replication, recombination and repair	Molecular Function: DNA binding (GO:0003677);; Cellular Component: nucleus (GO:0005634);; Biological Process: DNA replication (GO:0006260);; Biological Process: regulation of DNA replication (GO:0006275);; Molecular Function: DNA polymerase processivity factor activity (GO:0030337);;	K04802|1.1e-142|cjc:100401232|K04802 proliferating cell nuclear antigen | (RefSeq) PCNA; proliferating cell nuclear antigen	DNA replication (ko03030);; Base excision repair (ko03410);; Nucleotide excision repair (ko03420);; Mismatch repair (ko03430);; Cell cycle (ko04110);; Tight junction (ko04530);; Hepatitis B (ko05161)	[L]	Replication, recombination and repair	Proliferating cell nuclear antigen, C-terminal domain	Proliferating cell nuclear antigen OS=Homo sapiens OX=9606 GN=PCNA PE=1 SV=1	L	Replication, recombination and repair	proliferating cell nuclear antigen [Macaca mulatta]	molecular function: binding (GO:0005488);; cellular component: cell (GO:0005623);; cellular component: organelle (GO:0043226);; cellular component: cell part (GO:0044464);; biological process: metabolic process (GO:0008152);; biological process: cellular process (GO:0009987);; biological process: biological regulation (GO:0065007);; molecular function: molecular function regulator (GO:0098772)
ENSG00000129173	E2F8	0.148227	25	0.459167	56	0.348131	43	2.354458	316	2.590875	313	1.768324	226	1.90E-15	-2.571862896	down	--	--	Biological Process: reproduction (GO:0000003);; Biological Process: cell cycle checkpoint (GO:0000075);; Biological Process: DNA damage checkpoint (GO:0000077);; Biological Process: negative regulation of transcription from RNA polymerase II promoter (GO:0000122);; Biological Process: mitotic cell cycle (GO:0000278);; Molecular Function: transcription regulatory region sequence-specific DNA bindi…	K09391|0.0e+00|hsa:79733|K09391 transcription factor E2F7/8 | (RefSeq) E2F8, E2F-8; E2F transcription factor 8	--	--	--	E2F/DP family winged-helix DNA-binding domain	Transcription factor E2F8 OS=Homo sapiens OX=9606 GN=E2F8 PE=1 SV=1	K	Transcription	transcription factor E2F8 [Homo sapiens]	biological process: reproduction (GO:0000003);; biological process: cellular process (GO:0009987);; biological process: biological regulation (GO:0065007);; biological process: response to stimulus (GO:0050896);; biological process: single-organism process (GO:0044699);; molecular function: binding (GO:0005488);; molecular function: nucleic acid binding transcription factor activity (GO:0001071);…
ENSG00000146670	CDCA5	12.593566	1515	20.197557	1896	11.77899	1049	79.121186	8326	81.48071	7744	94.58986	9337	4.57E-31	-2.557562467	down	--	--	Cellular Component: nuclear chromatin (GO:0000790);; Cellular Component: nucleoplasm (GO:0005654);; Cellular Component: cytoplasm (GO:0005737);; Biological Process: mitotic sister chromatid cohesion (GO:0007064);; Biological Process: cell division (GO:0051301);;	K17390|5.1e-132|hsa:113130|K17390 sororin | (RefSeq) CDCA5, SORORIN; cell division cycle associated 5	MicroRNAs in cancer (ko05206)	--	--	Sororin protein	Sororin OS=Homo sapiens OX=9606 GN=CDCA5 PE=1 SV=1	L	Replication, recombination and repair	sororin [Homo sapiens]	cellular component: cell (GO:0005623);; cellular component: membrane-enclosed lumen (GO:0031974);; cellular component: organelle (GO:0043226);; cellular component: organelle part (GO:0044422);; cellular component: cell part (GO:0044464);; biological process: cellular process (GO:0009987);; biological process: single-organism process (GO:0044699);; biological process: cellular component organizati…
ENSG00000198056	PRIM1	2.952276	194	3.594582	183	2.368055	118	16.580308	951	18.527087	958	15.390619	833	3.07E-38	-2.554973104	down	--	--	Molecular Function: DNA primase activity (GO:0003896);;	K02684|1.4e-81|csab:103238542|K02684 DNA primase small subunit [EC:2.7.7.102] | (RefSeq) PRIM1; primase (DNA) subunit 1	DNA replication (ko03030)	[L]	Replication, recombination and repair	DNA primase small subunit	DNA primase small subunit OS=Homo sapiens OX=9606 GN=PRIM1 PE=1 SV=1	L	Replication, recombination and repair	PRIM1 isoform 1 [Pongo abelii]	biological process: metabolic process (GO:0008152);; biological process: cellular process (GO:0009987);; molecular function: catalytic activity (GO:0003824)
ENSG00000164045	CDC25A	1.142316	202	1.288614	178	0.994839	132	5.984169	901	7.021461	930	6.704124	954	4.03E-41	-2.543266948	down	--	--	Molecular Function: protein tyrosine phosphatase activity (GO:0004725);; Biological Process: cell division (GO:0051301);; Biological Process: positive regulation of cell cycle G2/M phase transition (GO:1902751);;	K06645|1.6e-308|hsa:993|K06645 M-phase inducer phosphatase 1 [EC:3.1.3.48] | (RefSeq) CDC25A, CDC25A2; cell division cycle 25A	Cell cycle (ko04110);; Cellular senescence (ko04218);; Progesterone-mediated oocyte maturation (ko04914);; MicroRNAs in cancer (ko05206)	[D]	Cell cycle control, cell division, chromosome partitioning	M-phase inducer phosphatase	M-phase inducer phosphatase 1 OS=Homo sapiens OX=9606 GN=CDC25A PE=1 SV=2	D	Cell cycle control, cell division, chromosome partitioning	M-phase inducer phosphatase 1 isoform a [Homo sapiens]	biological process: metabolic process (GO:0008152);; biological process: cellular process (GO:0009987);; molecular function: catalytic activity (GO:0003824);; biological process: single-organism process (GO:0044699);; biological process: biological regulation (GO:0065007)
ENSG00000136982	DSCC1	1.258671	136	1.481367	126	0.825305	67	8.054482	760	7.60072	651	5.299428	470	3.43E-24	-2.528681501	down	--	--	Biological Process: mitotic sister chromatid cohesion (GO:0007064);; Cellular Component: Ctf18 RFC-like complex (GO:0031390);;	K11271|3.1e-229|hsa:79075|K11271 sister chromatid cohesion protein DCC1 | (RefSeq) DSCC1, DCC1; DNA replication and sister chromatid cohesion 1	--	[D]	Cell cycle control, cell division, chromosome partitioning	Sister chromatid cohesion protein Dcc1	Sister chromatid cohesion protein DCC1 OS=Homo sapiens OX=9606 GN=DSCC1 PE=1 SV=2	L	Replication, recombination and repair	sister chromatid cohesion protein DCC1 [Homo sapiens]	biological process: cellular process (GO:0009987);; biological process: single-organism process (GO:0044699);; biological process: cellular component organization or biogenesis (GO:0071840);; cellular component: cell (GO:0005623);; cellular component: macromolecular complex (GO:0032991);; cellular component: organelle (GO:0043226);; cellular component: organelle part (GO:0044422);; cellular compo…
ENSG00000165891	E2F7	0.153212	35	0.253597	45	0.163914	33	1.09221	249	1.728024	359	0.652816	141	1.02E-13	-2.513349079	down	--	--	Molecular Function: DNA binding (GO:0003677);; Molecular Function: transcription factor activity, sequence-specific DNA binding (GO:0003700);; Cellular Component: transcription factor complex (GO:0005667);; Cellular Component: nuclear speck (GO:0016607);;	K09391|0.0e+00|hsa:144455|K09391 transcription factor E2F7/8 | (RefSeq) E2F7; E2F transcription factor 7	--	[K]	Transcription	E2F/DP family winged-helix DNA-binding domain	Transcription factor E2F7 OS=Homo sapiens OX=9606 GN=E2F7 PE=1 SV=3	K	Transcription	transcription factor E2F7 [Homo sapiens]	molecular function: binding (GO:0005488);; biological process: biological regulation (GO:0065007);; molecular function: nucleic acid binding transcription factor activity (GO:0001071);; cellular component: cell (GO:0005623);; cellular component: macromolecular complex (GO:0032991);; cellular component: cell part (GO:0044464);; cellular component: membrane-enclosed lumen (GO:0031974);; cellular co…
ENSG00000159259	CHAF1B	1.203921	252	1.248451	205	0.962129	151	6.380842	1166	6.031073	999	5.906354	1014	2.36E-44	-2.498404023	down	--	--	Cellular Component: nuclear chromosome (GO:0000228);; Cellular Component: chromatin (GO:0000785);; Cellular Component: nuclear chromatin (GO:0000790);; Molecular Function: molecular_function (GO:0003674);; Molecular Function: chromatin binding (GO:0003682);; Molecular Function: binding (GO:0005488);; Molecular Function: protein binding (GO:0005515);; Cellular Component: cellular_component (GO:000…	K10751|0.0e+00|hsa:8208|K10751 chromatin assembly factor 1 subunit B | (RefSeq) CHAF1B, CAF-1, CAF-IP60, CAF1, CAF1A, CAF1P60, MPHOSPH7, MPP7; chromatin assembly factor 1 subunit B	--	[BL]	Chromatin structure and dynamics;; Replication, recombination and repair	Chromatin assembly factor complex 1 subunit p60, C-terminal	Chromatin assembly factor 1 subunit B OS=Homo sapiens OX=9606 GN=CHAF1B PE=1 SV=1	B	Chromatin structure and dynamics	chromatin assembly factor 1 subunit B [Homo sapiens]	cellular component: cell (GO:0005623);; cellular component: organelle (GO:0043226);; cellular component: organelle part (GO:0044422);; cellular component: cell part (GO:0044464);; cellular component: membrane-enclosed lumen (GO:0031974);; molecular function: binding (GO:0005488);; biological process: cellular process (GO:0009987);; biological process: cellular component organization or biogenesis…
ENSG00000144354	CDCA7	2.528126	281	2.479972	230	1.901536	157	13.028806	1360	13.369827	1268	9.538261	929	5.58E-35	-2.496676413	down	--	--	Biological Process: regulation of transcription, DNA-templated (GO:0006355);; Biological Process: regulation of cell proliferation (GO:0042127);; Biological Process: cell division (GO:0051301);;	K23408|6.1e-237|ptr:459747|K23408 cell division cycle-associated protein 7 | (RefSeq) CDCA7; cell division cycle-associated protein 7 isoform X1	--	--	--	Zinc-finger domain of monoamine-oxidase A repressor R1	Cell division cycle-associated protein 7 OS=Homo sapiens OX=9606 GN=CDCA7 PE=1 SV=1	K	Transcription	cell division cycle-associated protein 7 isoform 1 [Homo sapiens]	biological process: biological regulation (GO:0065007);; biological process: cellular process (GO:0009987);; biological process: single-organism process (GO:0044699)
ENSG00000122952	ZWINT	10.253669	841	8.984169	596	8.666994	546	50.646438	3639	49.508664	3250	47.154	3205	3.80E-68	-2.493545044	down	--	--	Cellular Component: kinetochore (GO:0000776);; Biological Process: mitotic cell cycle checkpoint (GO:0007093);;	K19943|1.1e-140|hsa:11130|K19943 ZW10 interactor | (RefSeq) ZWINT, HZwint-1, KNTC2AP, SIP30, ZWINT1; ZW10 interacting kinetochore protein	--	--	--	ZW10 interactor	ZW10 interactor OS=Homo sapiens OX=9606 GN=ZWINT PE=1 SV=2	S	Function unknown	ZW10 interactor isoform a [Homo sapiens]	cellular component: cell (GO:0005623);; cellular component: macromolecular complex (GO:0032991);; cellular component: organelle (GO:0043226);; cellular component: organelle part (GO:0044422);; cellular component: cell part (GO:0044464);; biological process: cellular process (GO:0009987);; biological process: single-organism process (GO:0044699);; biological process: biological regulation (GO:0065…
ENSG00000123080	CDKN2C	2.184673	212	2.34086	176	1.882168	145	8.454421	838	11.166108	855	12.643448	1157	1.70E-29	-2.491108357	down	--	--	Molecular Function: cyclin-dependent protein serine/threonine kinase inhibitor activity (GO:0004861);; Biological Process: negative regulation of cell proliferation (GO:0008285);; Molecular Function: kinase activity (GO:0016301);; Molecular Function: protein kinase binding (GO:0019901);; Biological Process: oligodendrocyte differentiation (GO:0048709);;	K06622|3.7e-78|csab:103224834|K06622 cyclin-dependent kinase inhibitor 2C | (RefSeq) CDKN2C; cyclin dependent kinase inhibitor 2C	Endocrine resistance (ko01522);; Cell cycle (ko04110);; Cushing syndrome (ko04934);; Human T-cell leukemia virus 1 infection (ko05166);; Transcriptional misregulation in cancer (ko05202)	[R]	General function prediction only	Ankyrin repeats (many copies)	Cyclin-dependent kinase 4 inhibitor C OS=Homo sapiens OX=9606 GN=CDKN2C PE=1 SV=1	S	Function unknown	cyclin-dependent kinase 4 inhibitor C [Homo sapiens]	biological process: biological regulation (GO:0065007);; molecular function: molecular function regulator (GO:0098772);; molecular function: catalytic activity (GO:0003824);; molecular function: binding (GO:0005488);; biological process: cellular process (GO:0009987);; biological process: multicellular organismal process (GO:0032501);; biological process: developmental process (GO:0032502);; biol…
ENSG00000131153	GINS2	2.219573	230	2.37695	216	2.027111	168	9.524672	1019	11.486886	1095	11.21012	1105	8.96E-41	-2.489656076	down	--	--	Cellular Component: nucleus (GO:0005634);; Biological Process: DNA replication (GO:0006260);;	K10733|2.4e-102|ggo:101149969|K10733 GINS complex subunit 2 | (RefSeq) GINS2; DNA replication complex GINS protein PSF2	--	[S]	Function unknown	GINS complex protein	DNA replication complex GINS protein PSF2 OS=Homo sapiens OX=9606 GN=GINS2 PE=1 SV=1	L	Replication, recombination and repair	DNA replication complex GINS protein PSF2 [Homo sapiens]	cellular component: cell (GO:0005623);; cellular component: organelle (GO:0043226);; cellular component: cell part (GO:0044464);; biological process: metabolic process (GO:0008152);; biological process: cellular process (GO:0009987)
ENSG00000094804	CDC6	3.298292	568	3.008328	412	3.196228	346	15.579252	2522	15.252836	2214	12.161327	1935	1.29E-53	-2.462042208	down	[L]	Replication, recombination and repair	Cellular Component: nucleus (GO:0005634);; Biological Process: DNA replication initiation (GO:0006270);; Biological Process: positive regulation of cyclin-dependent protein serine/threonine kinase activity (GO:0045737);; Biological Process: positive regulation of fibroblast proliferation (GO:0048146);; Biological Process: cell division (GO:0051301);; Biological Process: cellular response to vasop…	K02213|0.0e+00|hsa:990|K02213 cell division control protein 6 | (RefSeq) CDC6, CDC18L, HsCDC18, HsCDC6, MGORS5; cell division cycle 6	Cell cycle (ko04110)	[LD]	Replication, recombination and repair;; Cell cycle control, cell division, chromosome partitioning	CDC6, C terminal winged helix domain	Cell division control protein 6 homolog OS=Homo sapiens OX=9606 GN=CDC6 PE=1 SV=1	L	Replication, recombination and repair	cell division control protein 6 homolog [Homo sapiens]	cellular component: cell (GO:0005623);; cellular component: organelle (GO:0043226);; cellular component: cell part (GO:0044464);; biological process: metabolic process (GO:0008152);; biological process: cellular process (GO:0009987);; biological process: biological regulation (GO:0065007);; biological process: single-organism process (GO:0044699);; biological process: response to stimulus (GO:005…
ENSG00000089685	BIRC5	6.193102	740	6.875441	657	6.322085	571	31.798181	3360	29.822479	2858	36.358964	3602	1.05E-46	-2.433927652	down	--	--	Biological Process: microtubule cytoskeleton organization (GO:0000226);; Cellular Component: cytoplasm (GO:0005737);; Biological Process: regulation of mitotic cell cycle (GO:0007346);; Biological Process: negative regulation of neuron apoptotic process (GO:0043524);; Biological Process: regulation of insulin secretion involved in cellular response to glucose stimulus (GO:0061178);; Biological Pr…	K08731|1.3e-75|hsa:332|K08731 baculoviral IAP repeat-containing protein 5 | (RefSeq) BIRC5, API4, EPR-1; baculoviral IAP repeat containing 5	Platinum drug resistance (ko01524);; Apoptosis (ko04210);; Apoptosis - multiple species (ko04215);; Hippo signaling pathway (ko04390);; Hepatitis B (ko05161);; Pathways in cancer (ko05200);; Colorectal cancer (ko05210)	[DR]	Cell cycle control, cell division, chromosome partitioning;; General function prediction only	Inhibitor of Apoptosis domain	Baculoviral IAP repeat-containing protein 5 OS=Homo sapiens OX=9606 GN=BIRC5 PE=1 SV=3	D	Cell cycle control, cell division, chromosome partitioning	baculoviral IAP repeat-containing protein 5 isoform 3 [Homo sapiens]	biological process: cellular process (GO:0009987);; biological process: cellular component organization or biogenesis (GO:0071840);; cellular component: cell (GO:0005623);; cellular component: cell part (GO:0044464);; biological process: biological regulation (GO:0065007)
ENSG00000129195	PIMREG	4.731321	386	5.493053	285	5.336977	312	22.048652	1490	25.218574	1486	32.19102	1925	8.15E-34	-2.413234961	down	--	--	Cellular Component: nucleoplasm (GO:0005654);; Cellular Component: nucleolus (GO:0005730);;	--	--	--	--	Regulator of chromosome segregation 1	Protein PIMREG OS=Homo sapiens OX=9606 GN=PIMREG PE=1 SV=1	S	Function unknown	protein PIMREG isoform 1 [Homo sapiens]	cellular component: cell (GO:0005623);; cellular component: organelle (GO:0043226);; cellular component: organelle part (GO:0044422);; cellular component: cell part (GO:0044464)
ENSG00000179750	APOBEC3B	8.050802	609	9.850764	548	8.708974	475	38.230344	2399	44.974424	2556	52.636317	3096	2.59E-37	-2.405804634	down	--	--	Cellular Component: nucleoplasm (GO:0005654);; Molecular Function: zinc ion binding (GO:0008270);; Molecular Function: hydrolase activity (GO:0016787);;	K18750|3.9e-237|hsa:9582|K18750 C->U-editing enzyme APOBEC3 [EC:3.5.4.-] | (RefSeq) APOBEC3B, A3B, APOBEC1L, ARCD3, ARP4, DJ742C19.2, PHRBNL, bK150C2.2; apolipoprotein B mRNA editing enzyme catalytic subunit 3B	Human immunodeficiency virus 1 infection (ko05170)	--	--	Novel AID APOBEC clade 2	DNA dC->dU-editing enzyme APOBEC-3B OS=Homo sapiens OX=9606 GN=APOBEC3B PE=1 SV=1	L	Replication, recombination and repair	apolipoprotein B mRNA editing enzyme, catalytic polypeptide-like 3B, isoform CRA_a [Homo sapiens]	cellular component: cell (GO:0005623);; cellular component: organelle (GO:0043226);; cellular component: organelle part (GO:0044422);; cellular component: cell part (GO:0044464);; molecular function: binding (GO:0005488);; molecular function: catalytic activity (GO:0003824)
ENSG00000100479	POLE2	1.255308	100	1.435573	90	0.392757	25	6.678619	453	8.053119	492	4.443393	300	8.87E-13	-2.401445038	down	--	--	Molecular Function: DNA binding (GO:0003677);; Biological Process: DNA-dependent DNA replication (GO:0006261);; Cellular Component: epsilon DNA polymerase complex (GO:0008622);;	K02325|1.2e-289|hsa:5427|K02325 DNA polymerase epsilon subunit 2 [EC:2.7.7.7] | (RefSeq) POLE2, DPE2; DNA polymerase epsilon 2, accessory subunit	DNA replication (ko03030);; Base excision repair (ko03410);; Nucleotide excision repair (ko03420)	[L]	Replication, recombination and repair	DNA polymerase alpha/epsilon subunit B	DNA polymerase epsilon subunit 2 OS=Homo sapiens OX=9606 GN=POLE2 PE=1 SV=2	L	Replication, recombination and repair	DNA polymerase epsilon subunit 2 isoform 2 [Homo sapiens]	molecular function: binding (GO:0005488);; biological process: metabolic process (GO:0008152);; biological process: cellular process (GO:0009987);; cellular component: cell (GO:0005623);; cellular component: membrane-enclosed lumen (GO:0031974);; cellular component: macromolecular complex (GO:0032991);; cellular component: organelle (GO:0043226);; cellular component: organelle part (GO:0044422);;…
ENSG00000091651	ORC6	3.848544	293	3.934832	235	3.643603	209	19.611207	1302	17.397774	1045	16.948528	1058	4.31E-45	-2.32791817	down	--	--	Cellular Component: fibrillar center (GO:0001650);; Molecular Function: DNA binding (GO:0003677);; Cellular Component: nucleoplasm (GO:0005654);; Cellular Component: nuclear origin of replication recognition complex (GO:0005664);; Biological Process: DNA replication (GO:0006260);;	K02608|1.6e-107|hsa:23594|K02608 origin recognition complex subunit 6 | (RefSeq) ORC6, ORC6L; origin recognition complex subunit 6	Cell cycle (ko04110)	[L]	Replication, recombination and repair	Origin recognition complex subunit 6 (ORC6)	Origin recognition complex subunit 6 OS=Homo sapiens OX=9606 GN=ORC6 PE=1 SV=1	L	Replication, recombination and repair	origin recognition complex subunit 6 [Homo sapiens]	cellular component: cell (GO:0005623);; cellular component: membrane-enclosed lumen (GO:0031974);; cellular component: organelle (GO:0043226);; cellular component: organelle part (GO:0044422);; cellular component: cell part (GO:0044464);; molecular function: binding (GO:0005488);; cellular component: macromolecular complex (GO:0032991);; biological process: metabolic process (GO:0008152);; biolog…
ENSG00000121152	NCAPH	4.773165	533	7.152376	662	4.641359	433	25.44026	2649	29.36422	2698	25.358908	2404	2.46E-31	-2.323155826	down	--	--	Cellular Component: condensin complex (GO:0000796);; Cellular Component: nucleoplasm (GO:0005654);; Cellular Component: cytosol (GO:0005829);; Biological Process: mitotic chromosome condensation (GO:0007076);; Biological Process: cell division (GO:0051301);;	K06676|0.0e+00|hsa:23397|K06676 condensin complex subunit 2 | (RefSeq) NCAPH, BRRN1, CAP-H, CAPH, MCPH23; non-SMC condensin I complex subunit H	--	[BD]	Chromatin structure and dynamics;; Cell cycle control, cell division, chromosome partitioning	Condensin complex subunit 2	Condensin complex subunit 2 OS=Homo sapiens OX=9606 GN=NCAPH PE=1 SV=3	--	--	condensin complex subunit 2 isoform 1 [Homo sapiens]	cellular component: cell (GO:0005623);; cellular component: macromolecular complex (GO:0032991);; cellular component: organelle (GO:0043226);; cellular component: organelle part (GO:0044422);; cellular component: cell part (GO:0044464);; biological process: cellular process (GO:0009987);; biological process: single-organism process (GO:0044699);; biological process: cellular component organizatio…
Homo_sapiens_newGene_4999	--	0.085922	8	0.079427	6	0.060036	5	0.586541	46	0.814148	58	0.532396	39	7.86E-08	-2.321901275	down	--	--	--	K10175|5.7e-07|cjc:100413016|K10175 T-box protein 1 | (RefSeq) TBX1; T-box 1	--	[K]	Transcription	--	--	--	--	unknown [Homo sapiens]	--
ENSG00000165480	SKA3	1.056757	144	1.840866	168	1.314796	119	7.238075	842	8.038745	812	4.919896	487	3.06E-21	-2.317831455	down	--	--	Cellular Component: condensed chromosome outer kinetochore (GO:0000940);; Biological Process: chromosome segregation (GO:0007059);;	K11857|8.0e-34|ptg:102964137|K11857 ubiquitin carboxyl-terminal hydrolase 47 [EC:3.4.19.12] | (RefSeq) USP47; ubiquitin specific peptidase 47	--	--	--	--	Spindle and kinetochore-associated protein 3 OS=Homo sapiens OX=9606 GN=SKA3 PE=1 SV=2	S	Function unknown	spindle and kinetochore-associated protein 3 isoform 1 [Homo sapiens]	cellular component: cell (GO:0005623);; cellular component: macromolecular complex (GO:0032991);; cellular component: organelle (GO:0043226);; cellular component: organelle part (GO:0044422);; cellular component: cell part (GO:0044464);; biological process: cellular process (GO:0009987);; biological process: single-organism process (GO:0044699)
ENSG00000175063	UBE2C	21.375015	847	22.843698	707	17.38027	518	89.517337	3085	94.126983	2938	103.273935	3349	2.35E-40	-2.307304881	down	--	--	Molecular Function: ATP binding (GO:0005524);; Cellular Component: cytosol (GO:0005829);; Cellular Component: plasma membrane (GO:0005886);; Molecular Function: transferase activity (GO:0016740);;	K06688|6.9e-78|ggo:101149284|K06688 ubiquitin-conjugating enzyme E2 C [EC:2.3.2.23] | (RefSeq) UBE2C; ubiquitin-conjugating enzyme E2 C isoform X1	Ubiquitin mediated proteolysis (ko04120)	[O]	Posttranslational modification, protein turnover, chaperones	Ubiquitin-conjugating enzyme	Ubiquitin-conjugating enzyme E2 C OS=Homo sapiens OX=9606 GN=UBE2C PE=1 SV=1	O	Posttranslational modification, protein turnover, chaperones	ubiquitin-conjugating enzyme E2 C isoform 1 [Homo sapiens]	molecular function: binding (GO:0005488);; cellular component: cell (GO:0005623);; cellular component: cell part (GO:0044464);; cellular component: membrane (GO:0016020);; molecular function: catalytic activity (GO:0003824)
ENSG00000166508	MCM7	40.077275	5470	44.788811	4786	37.366224	3823	173.077891	20866	177.149296	19348	205.441805	23251	6.92E-46	-2.304687548	down	[L]	Replication, recombination and repair	Molecular Function: DNA binding (GO:0003677);; Molecular Function: DNA helicase activity (GO:0003678);; Molecular Function: ATP binding (GO:0005524);; Cellular Component: nucleus (GO:0005634);; Biological Process: DNA replication initiation (GO:0006270);; Biological Process: cell cycle (GO:0007049);; Cellular Component: MCM complex (GO:0042555);;	K02210|1.2e-308|hsa:4176|K02210 DNA replication licensing factor MCM7 [EC:3.6.4.12] | (RefSeq) MCM7, CDC47, MCM2, P1.1-MCM3, P1CDC47, P85MCM, PNAS146, PPP1R104; minichromosome maintenance complex component 7	DNA replication (ko03030);; Cell cycle (ko04110)	[L]	Replication, recombination and repair	MCM P-loop domain	DNA replication licensing factor MCM7 OS=Homo sapiens OX=9606 GN=MCM7 PE=1 SV=4	L	Replication, recombination and repair	HsMcm7 [Homo sapiens]	molecular function: binding (GO:0005488);; molecular function: catalytic activity (GO:0003824);; cellular component: cell (GO:0005623);; cellular component: organelle (GO:0043226);; cellular component: cell part (GO:0044464);; biological process: metabolic process (GO:0008152);; biological process: cellular process (GO:0009987);; biological process: single-organism process (GO:0044699);; cellular…
ENSG00000154839	SKA1	1.252182	146	2.456144	216	1.157033	118	9.461881	795	9.33536	773	9.017413	761	1.89E-20	-2.289668501	down	--	--	Biological Process: chromosome segregation (GO:0007059);; Molecular Function: microtubule binding (GO:0008017);; Cellular Component: microtubule cytoskeleton (GO:0015630);; Biological Process: cell division (GO:0051301);;	--	--	[S]	Function unknown	Spindle and kinetochore-associated protein 1	Spindle and kinetochore-associated protein 1 OS=Homo sapiens OX=9606 GN=SKA1 PE=1 SV=1	S	Function unknown	spindle and kinetochore-associated protein 1 [Homo sapiens]	biological process: cellular process (GO:0009987);; biological process: single-organism process (GO:0044699);; molecular function: binding (GO:0005488);; cellular component: cell (GO:0005623);; cellular component: organelle (GO:0043226);; cellular component: cell part (GO:0044464)
ENSG00000131470	PSMC3IP	1.418525	90	1.258959	54	1.484592	61	6.381143	328	6.523638	302	6.81827	328	2.18E-22	-2.286879881	down	--	--	Biological Process: reciprocal meiotic recombination (GO:0007131);;	K06695|3.2e-114|hsa:29893|K06695 26S proteasome regulatory subunit, ATPase 3, interacting protein | (RefSeq) PSMC3IP, GT198, HOP2, HUMGT198A, ODG3, TBPIP; PSMC3 interacting protein	--	[T]	Signal transduction mechanisms	TBPIP/Hop2 winged helix domain	Homologous-pairing protein 2 homolog OS=Homo sapiens OX=9606 GN=PSMC3IP PE=1 SV=1	K	Transcription	PSMC3 interacting protein, isoform CRA_a [Homo sapiens]	biological process: reproduction (GO:0000003);; biological process: metabolic process (GO:0008152);; biological process: cellular process (GO:0009987);; biological process: reproductive process (GO:0022414);; biological process: single-organism process (GO:0044699)
ENSG00000135476	ESPL1	1.858324	567	2.537248	610	1.506946	349	8.935029	2404	8.596892	2074	9.77234	2463	2.36E-27	-2.268816208	down	--	--	--	K02365|2.5e-06|hsa:9700|K02365 separase [EC:3.4.22.49] | (RefSeq) ESPL1, ESP1, SEPA; extra spindle pole bodies like 1, separase	Cell cycle (ko04110);; Oocyte meiosis (ko04114);; Human T-cell leukemia virus 1 infection (ko05166)	--	--	--	Separin OS=Homo sapiens OX=9606 GN=ESPL1 PE=1 SV=3	--	--	ESPL1 isoform 2 [Pan troglodytes]	--
ENSG00000164104	HMGB2	25.550649	1873	29.933252	1691	24.839287	1360	117.609998	7765	117.828398	7056	111.476399	6712	7.44E-59	-2.266960996	down	--	--	Molecular Function: four-way junction DNA binding (GO:0000400);; Cellular Component: nuclear chromatin (GO:0000790);; Molecular Function: core promoter proximal region sequence-specific DNA binding (GO:0000987);; Biological Process: inflammatory response to antigenic stimulus (GO:0002437);; Molecular Function: DNA binding (GO:0003677);; Molecular Function: double-stranded DNA binding (GO:0003690)…	K11295|7.1e-95|aju:106976795|K11295 high mobility group protein B2 | (RefSeq) HMGB2; high mobility group protein B2	--	[R]	General function prediction only	HMG-box domain	High mobility group protein B2 OS=Homo sapiens OX=9606 GN=HMGB2 PE=1 SV=2	K	Transcription	high mobility group protein B2 [Macaca fascicularis]	molecular function: binding (GO:0005488);; cellular component: cell (GO:0005623);; cellular component: membrane-enclosed lumen (GO:0031974);; cellular component: organelle (GO:0043226);; cellular component: organelle part (GO:0044422);; cellular component: cell part (GO:0044464);; biological process: immune system process (GO:0002376);; biological process: response to stimulus (GO:0050896);; cell…
ENSG00000221829	FANCG	9.94318	1166	10.359237	968	9.059733	824	38.832227	4072	41.826603	3931	51.71709	5083	9.15E-36	-2.266807758	down	--	--	Biological Process: ovarian follicle development (GO:0001541);; Cellular Component: nucleolus (GO:0005730);; Cellular Component: cytosol (GO:0005829);; Cellular Component: plasma membrane (GO:0005886);; Biological Process: spermatid development (GO:0007286);; Biological Process: response to radiation (GO:0009314);; Biological Process: interstrand cross-link repair (GO:0036297);; Cellular Componen…	K10894|0.0e+00|hsa:2189|K10894 fanconi anemia group G protein | (RefSeq) FANCG, FAG, XRCC9; FA complementation group G	Fanconi anemia pathway (ko03460)	--	--	Tetratricopeptide repeat	Fanconi anemia group G protein OS=Homo sapiens OX=9606 GN=FANCG PE=1 SV=1	S	Function unknown	Fanconi anemia group G protein [Homo sapiens]	biological process: reproduction (GO:0000003);; biological process: reproductive process (GO:0022414);; biological process: multicellular organismal process (GO:0032501);; biological process: developmental process (GO:0032502);; biological process: single-organism process (GO:0044699);; biological process: rhythmic process (GO:0048511);; cellular component: cell (GO:0005623);; cellular component:…
ENSG00000186185	KIF18B	1.810127	315	2.022353	279	1.277182	181	7.994828	1280	7.088779	1013	7.518474	1141	1.31E-30	-2.251438101	down	--	--	Molecular Function: microtubule motor activity (GO:0003777);; Molecular Function: ATP binding (GO:0005524);; Cellular Component: microtubule (GO:0005874);; Biological Process: microtubule-based movement (GO:0007018);; Molecular Function: microtubule binding (GO:0008017);;	K10401|1.7e-163|npr:108796129|K10401 kinesin family member 18/19 | (RefSeq) kinesin-like protein KIF18B	--	--	--	Kinesin motor domain	Kinesin-like protein KIF18B OS=Homo sapiens OX=9606 GN=KIF18B PE=1 SV=4	Z	Cytoskeleton	kinesin-like protein KIF18B isoform X5 [Homo sapiens]	molecular function: catalytic activity (GO:0003824);; molecular function: binding (GO:0005488);; cellular component: cell (GO:0005623);; cellular component: organelle (GO:0043226);; cellular component: organelle part (GO:0044422);; cellular component: cell part (GO:0044464);; cellular component: supramolecular complex (GO:0099080);; biological process: cellular process (GO:0009987);; biological p…
ENSG00000121211	MND1	0.25659	12	0.585246	18	0.607027	20	2.073459	82	2.796551	100	2.9305	107	1.87E-09	-2.242244448	down	--	--	Molecular Function: double-stranded DNA binding (GO:0003690);; Cellular Component: nucleus (GO:0005634);; Biological Process: reciprocal meiotic recombination (GO:0007131);;	--	--	[DR]	Cell cycle control, cell division, chromosome partitioning;; General function prediction only	Mnd1 HTH domain	Meiotic nuclear division protein 1 homolog OS=Homo sapiens OX=9606 GN=MND1 PE=1 SV=1	B	Chromatin structure and dynamics	meiotic nuclear division protein 1 homolog isoform 1 [Homo sapiens]	molecular function: binding (GO:0005488);; cellular component: cell (GO:0005623);; cellular component: organelle (GO:0043226);; cellular component: cell part (GO:0044464);; biological process: reproduction (GO:0000003);; biological process: metabolic process (GO:0008152);; biological process: cellular process (GO:0009987);; biological process: reproductive process (GO:0022414);; biological proces…
ENSG00000105486	LIG1	5.736947	965	7.184186	894	5.644413	670	23.581359	3622	24.836457	3434	26.60446	3878	1.96E-40	-2.238437249	down	[L]	Replication, recombination and repair	Molecular Function: DNA binding (GO:0003677);; Molecular Function: DNA ligase (ATP) activity (GO:0003910);; Molecular Function: ATP binding (GO:0005524);; Biological Process: DNA replication (GO:0006260);; Biological Process: DNA recombination (GO:0006310);; Biological Process: DNA ligation involved in DNA repair (GO:0051103);; Biological Process: DNA biosynthetic process (GO:0071897);;	K10747|0.0e+00|hsa:3978|K10747 DNA ligase 1 [EC:6.5.1.1 6.5.1.6 6.5.1.7] | (RefSeq) LIG1; DNA ligase 1	DNA replication (ko03030);; Base excision repair (ko03410);; Nucleotide excision repair (ko03420);; Mismatch repair (ko03430)	[L]	Replication, recombination and repair	ATP dependent DNA ligase domain	DNA ligase 1 OS=Homo sapiens OX=9606 GN=LIG1 PE=1 SV=1	L	Replication, recombination and repair	DNA ligase I variant, partial [Homo sapiens]	molecular function: binding (GO:0005488);; biological process: metabolic process (GO:0008152);; biological process: cellular process (GO:0009987);; molecular function: catalytic activity (GO:0003824)
ENSG00000140534	TICRR	0.756942	206	1.094457	261	0.534923	112	3.428984	928	3.944206	962	3.211485	811	4.67E-18	-2.237338137	down	--	--	Biological Process: cell cycle checkpoint (GO:0000075);; Biological Process: DNA replication checkpoint (GO:0000076);; Biological Process: mitotic cell cycle (GO:0000278);; Biological Process: formation of translation preinitiation complex (GO:0001731);; Biological Process: cytoplasmic translation (GO:0002181);; Biological Process: cytoplasmic translational initiation (GO:0002183);; Molecular Fun…	--	--	--	--	Treslin N-terminus	Treslin OS=Homo sapiens OX=9606 GN=TICRR PE=1 SV=2	L	Replication, recombination and repair	treslin isoform 2 [Homo sapiens]	biological process: cellular process (GO:0009987);; biological process: biological regulation (GO:0065007);; biological process: single-organism process (GO:0044699);; biological process: cellular component organization or biogenesis (GO:0071840);; biological process: metabolic process (GO:0008152);; molecular function: binding (GO:0005488);; cellular component: cell (GO:0005623);; cellular compo…
ENSG00000137804	NUSAP1	1.186342	122	1.54969	128	2.355517	184	8.482349	794	10.379584	846	5.653005	488	7.22E-16	-2.230370808	down	--	--	Biological Process: mitotic cytokinesis (GO:0000281);; Cellular Component: spindle (GO:0005819);; Cellular Component: microtubule (GO:0005874);; Biological Process: establishment of mitotic spindle localization (GO:0040001);;	K15178|1.4e-20|ola:105356879|K15178 RNA polymerase-associated protein RTF1 | (RefSeq) RNA polymerase-associated protein RTF1 homolog isoform X1	--	--	--	Nucleolar and spindle-associated protein	Nucleolar and spindle-associated protein 1 OS=Homo sapiens OX=9606 GN=NUSAP1 PE=1 SV=1	Z	Cytoskeleton	nucleolar and spindle-associated protein 1 isoform 5 [Homo sapiens]	biological process: cellular process (GO:0009987);; biological process: single-organism process (GO:0044699);; cellular component: cell (GO:0005623);; cellular component: organelle (GO:0043226);; cellular component: organelle part (GO:0044422);; cellular component: cell part (GO:0044464);; cellular component: supramolecular complex (GO:0099080);; biological process: localization (GO:0051179);; bi…
ENSG00000183856	IQGAP3	3.082998	862	3.819764	836	2.682681	563	13.827382	3376	13.285118	2941	13.993515	3208	6.26E-36	-2.193546649	down	--	--	Biological Process: signal transduction (GO:0007165);; Biological Process: regulation of GTPase activity (GO:0043087);;	K05767|0.0e+00|hsa:128239|K05767 Ras GTPase-activating-like protein IQGAP2/3 | (RefSeq) IQGAP3; IQ motif containing GTPase activating protein 3	Regulation of actin cytoskeleton (ko04810)	[T]	Signal transduction mechanisms	GTPase-activator protein for Ras-like GTPase	Ras GTPase-activating-like protein IQGAP3 OS=Homo sapiens OX=9606 GN=IQGAP3 PE=1 SV=2	Z	Cytoskeleton	ras GTPase-activating-like protein IQGAP3 [Homo sapiens]	biological process: cellular process (GO:0009987);; biological process: biological regulation (GO:0065007)
ENSG00000117399	CDC20	14.215641	1125	17.862553	1100	15.381676	917	63.435439	4372	60.36503	3763	76.66827	4959	1.32E-32	-2.167164071	down	[R]	General function prediction only	Molecular Function: anaphase-promoting complex binding (GO:0010997);; Biological Process: cell division (GO:0051301);; Molecular Function: ubiquitin-protein transferase activator activity (GO:0097027);; Biological Process: positive regulation of ubiquitin protein ligase activity (GO:1904668);;	K03363|7.4e-284|ggo:101152075|K03363 cell division cycle 20, cofactor of APC complex | (RefSeq) CDC20; cell division cycle protein 20 homolog	Cell cycle (ko04110);; Oocyte meiosis (ko04114);; Ubiquitin mediated proteolysis (ko04120);; Human T-cell leukemia virus 1 infection (ko05166);; Viral carcinogenesis (ko05203)	[DO]	Cell cycle control, cell division, chromosome partitioning;; Posttranslational modification, protein turnover, chaperones	WD domain, G-beta repeat	Cell division cycle protein 20 homolog OS=Homo sapiens OX=9606 GN=CDC20 PE=1 SV=2	--	--	cell division cycle protein 20 homolog [Homo sapiens]	molecular function: binding (GO:0005488);; biological process: cellular process (GO:0009987);; biological process: single-organism process (GO:0044699);; biological process: biological regulation (GO:0065007);; molecular function: molecular function regulator (GO:0098772)
Homo_sapiens_newGene_7559	--	0.195736	19	0.096946	8	0.099563	8	0.888891	70	1.459244	82	0.732645	47	1.12E-07	-2.159547423	down	--	--	--	--	--	--	--	--	--	--	--	--	--
ENSG00000158402	CDC25C	1.740375	170	1.5434	119	1.844387	130	7.365382	569	7.65539	572	9.378743	596	3.41E-28	-2.158316802	down	--	--	Biological Process: cell cycle checkpoint (GO:0000075);; Biological Process: DNA damage checkpoint (GO:0000077);; Biological Process: regulation of cyclin-dependent protein serine/threonine kinase activity (GO:0000079);; Biological Process: G2/M transition of mitotic cell cycle (GO:0000086);; Biological Process: mitotic cell cycle (GO:0000278);; Biological Process: regulation of protein phosphory…	K05867|4.1e-112|hsa:995|K05867 M-phase inducer phosphatase 3 [EC:3.1.3.48] | (RefSeq) CDC25C, CDC25, PPP1R60; cell division cycle 25C	Cell cycle (ko04110);; Oocyte meiosis (ko04114);; Progesterone-mediated oocyte maturation (ko04914);; Human immunodeficiency virus 1 infection (ko05170);; MicroRNAs in cancer (ko05206)	[D]	Cell cycle control, cell division, chromosome partitioning	--	M-phase inducer phosphatase 3 OS=Homo sapiens OX=9606 GN=CDC25C PE=1 SV=2	D	Cell cycle control, cell division, chromosome partitioning	M-phase inducer phosphatase 3 isoform X2 [Homo sapiens]	biological process: cellular process (GO:0009987);; biological process: biological regulation (GO:0065007);; biological process: response to stimulus (GO:0050896);; biological process: single-organism process (GO:0044699);; molecular function: catalytic activity (GO:0003824);; biological process: metabolic process (GO:0008152);; molecular function: binding (GO:0005488);; cellular component: cell …
ENSG00000213347	MXD3	3.833183	323	3.26737	176	2.846165	169	11.64069	861	12.774729	848	15.408425	1047	2.92E-22	-2.156964011	down	--	--	Molecular Function: RNA polymerase II regulatory region sequence-specific DNA binding (GO:0000977);; Molecular Function: transcriptional repressor activity, RNA polymerase II transcription regulatory region sequence-specific binding (GO:0001227);; Molecular Function: protein dimerization activity (GO:0046983);; Cellular Component: RNA polymerase II transcription factor complex (GO:0090575);;	K09114|2.2e-87|sbq:101053769|K09114 MAX dimerization protein | (RefSeq) MXD3; max dimerization protein 3 isoform X4	--	[K]	Transcription	Helix-loop-helix DNA-binding domain	Max dimerization protein 3 OS=Homo sapiens OX=9606 GN=MXD3 PE=1 SV=1	K	Transcription	max dimerization protein 3 isoform b [Homo sapiens]	molecular function: binding (GO:0005488);; biological process: biological regulation (GO:0065007);; molecular function: nucleic acid binding transcription factor activity (GO:0001071);; cellular component: cell (GO:0005623);; cellular component: macromolecular complex (GO:0032991);; cellular component: organelle (GO:0043226);; cellular component: organelle part (GO:0044422);; cellular component: …
ENSG00000166851	PLK1	11.001217	1121	14.372343	1167	10.991612	845	46.419784	4129	48.448041	3982	56.743089	4782	1.33E-30	-2.148466259	down	[T]	Signal transduction mechanisms	Molecular Function: protein serine/threonine kinase activity (GO:0004674);; Molecular Function: ATP binding (GO:0005524);;	K06631|0.0e+00|hsa:5347|K06631 polo-like kinase 1 [EC:2.7.11.21] | (RefSeq) PLK1, PLK, STPK13; polo like kinase 1	FoxO signaling pathway (ko04068);; Cell cycle (ko04110);; Oocyte meiosis (ko04114);; Progesterone-mediated oocyte maturation (ko04914)	[D]	Cell cycle control, cell division, chromosome partitioning	Protein kinase domain	Serine/threonine-protein kinase PLK1 OS=Homo sapiens OX=9606 GN=PLK1 PE=1 SV=1	D	Cell cycle control, cell division, chromosome partitioning	serine/threonine-protein kinase PLK1 [Homo sapiens]	biological process: metabolic process (GO:0008152);; biological process: cellular process (GO:0009987);; molecular function: catalytic activity (GO:0003824);; molecular function: binding (GO:0005488)
ENSG00000183150	GPR19	0.277727	24	0.291863	19	0.09166	6	1.429975	93	1.373185	84	1.231284	81	2.67E-08	-2.146138154	down	--	--	Molecular Function: G-protein coupled receptor activity (GO:0004930);; Cellular Component: integral component of membrane (GO:0016021);;	K04316|9.3e-240|hsa:2842|K04316 G protein-coupled receptor 19 | (RefSeq) GPR19; G protein-coupled receptor 19	--	[R]	General function prediction only	7 transmembrane receptor (rhodopsin family)	Probable G-protein coupled receptor 19 OS=Homo sapiens OX=9606 GN=GPR19 PE=2 SV=2	T	Signal transduction mechanisms	probable G-protein coupled receptor 19 [Homo sapiens]	biological process: cellular process (GO:0009987);; biological process: signaling (GO:0023052);; biological process: single-organism process (GO:0044699);; biological process: response to stimulus (GO:0050896);; biological process: biological regulation (GO:0065007);; molecular function: signal transducer activity (GO:0004871);; molecular function: molecular transducer activity (GO:0060089);; cel…
ENSG00000014138	POLA2	5.928779	949	4.818667	620	4.958366	604	17.762437	2553	28.01641	3619	19.623302	2606	3.03E-27	-2.135041045	down	--	--	Molecular Function: DNA binding (GO:0003677);; Cellular Component: nucleus (GO:0005634);; Biological Process: DNA replication (GO:0006260);;	K02321|0.0e+00|hsa:23649|K02321 DNA polymerase alpha subunit B | (RefSeq) POLA2; DNA polymerase alpha 2, accessory subunit	DNA replication (ko03030)	[L]	Replication, recombination and repair	DNA polymerase alpha/epsilon subunit B	DNA polymerase alpha subunit B OS=Homo sapiens OX=9606 GN=POLA2 PE=1 SV=2	L	Replication, recombination and repair	DNA polymerase alpha subunit B [Homo sapiens]	molecular function: binding (GO:0005488);; cellular component: cell (GO:0005623);; cellular component: organelle (GO:0043226);; cellular component: cell part (GO:0044464);; biological process: metabolic process (GO:0008152);; biological process: cellular process (GO:0009987)
ENSG00000237649	KIFC1	6.630732	771	10.921523	1033	6.889124	624	31.650255	3349	33.368549	3180	36.57366	3693	3.41E-22	-2.134494316	down	--	--	Molecular Function: microtubule motor activity (GO:0003777);; Molecular Function: ATP binding (GO:0005524);; Cellular Component: microtubule (GO:0005874);; Biological Process: microtubule-based movement (GO:0007018);; Biological Process: spermatogenesis (GO:0007283);; Molecular Function: microtubule binding (GO:0008017);;	K10405|0.0e+00|hsa:3833|K10405 kinesin family member C1 | (RefSeq) KIFC1, HSET, KNSL2; kinesin family member C1	--	[Z]	Cytoskeleton	Kinesin motor domain	Kinesin-like protein KIFC1 OS=Homo sapiens OX=9606 GN=KIFC1 PE=1 SV=2	Z	Cytoskeleton	kinesin-like protein KIFC1 [Homo sapiens]	molecular function: catalytic activity (GO:0003824);; molecular function: binding (GO:0005488);; cellular component: cell (GO:0005623);; cellular component: organelle (GO:0043226);; cellular component: organelle part (GO:0044422);; cellular component: cell part (GO:0044464);; cellular component: supramolecular complex (GO:0099080);; biological process: cellular process (GO:0009987);; biological p…
ENSG00000013810	TACC3	8.939711	1142	13.648642	1341	9.236531	884	41.099778	4514	42.938635	4249	48.424225	4972	1.81E-26	-2.118484075	down	--	--	Biological Process: mitotic spindle organization (GO:0007052);;	K14283|0.0e+00|hsa:10460|K14283 transforming acidic coiled-coil-containing protein 3 | (RefSeq) TACC3, ERIC-1, ERIC1, Tacc4, maskin; transforming acidic coiled-coil containing protein 3	RNA transport (ko03013)	--	--	Transforming acidic coiled-coil-containing protein (TACC), C-terminal	Transforming acidic coiled-coil-containing protein 3 OS=Homo sapiens OX=9606 GN=TACC3 PE=1 SV=1	Z	Cytoskeleton	transforming acidic coiled-coil-containing protein 3 [Homo sapiens]	biological process: cellular process (GO:0009987);; biological process: single-organism process (GO:0044699);; biological process: cellular component organization or biogenesis (GO:0071840)
ENSG00000134690	CDCA8	5.101822	583	4.964367	445	4.538289	390	18.059671	1799	18.667018	1695	22.572769	2124	1.46E-31	-2.116777865	down	--	--	Biological Process: cell division (GO:0051301);;	K11514|2.6e-145|hsa:55143|K11514 Borealin | (RefSeq) CDCA8, BOR, BOREALIN, DasraB, MESRGP; cell division cycle associated 8	--	--	--	Cell division cycle-associated protein 8	Borealin OS=Homo sapiens OX=9606 GN=CDCA8 PE=1 SV=2	S	Function unknown	borealin [Pongo abelii]	biological process: cellular process (GO:0009987);; biological process: single-organism process (GO:0044699)
ENSG00000071539	TRIP13	6.427541	802	7.277051	711	4.585496	429	24.555937	2675	27.45064	2711	22.730469	2328	7.45E-28	-2.107312951	down	[MDT]	Cell wall/membrane/envelope biogenesis;; Cell cycle control, cell division, chromosome partitioning;; Signal transduction mechanisms	Molecular Function: ATP binding (GO:0005524);;	K22399|1.0e-241|hsa:9319|K22399 pachytene checkpoint protein 2 | (RefSeq) TRIP13, 16E1BP, MVA3; thyroid hormone receptor interactor 13	--	[O]	Posttranslational modification, protein turnover, chaperones	ATPase family associated with various cellular activities (AAA)	Pachytene checkpoint protein 2 homolog OS=Homo sapiens OX=9606 GN=TRIP13 PE=1 SV=2	L	Replication, recombination and repair	pachytene checkpoint protein 2 homolog isoform 1 [Homo sapiens]	molecular function: binding (GO:0005488)
ENSG00000165304	MELK	2.870146	330	3.613517	322	2.905171	245	13.588643	1322	14.224537	1275	10.571607	995	7.23E-31	-2.105397846	down	[M]	Cell wall/membrane/envelope biogenesis	Molecular Function: protein serine/threonine kinase activity (GO:0004674);; Molecular Function: ATP binding (GO:0005524);;	K08799|0.0e+00|hsa:9833|K08799 maternal embryonic leucine zipper kinase [EC:2.7.11.1] | (RefSeq) MELK, HPK38; maternal embryonic leucine zipper kinase	--	[T]	Signal transduction mechanisms	Protein kinase domain	Maternal embryonic leucine zipper kinase OS=Homo sapiens OX=9606 GN=MELK PE=1 SV=3	T	Signal transduction mechanisms	maternal embryonic leucine zipper kinase isoform 1 [Homo sapiens]	biological process: metabolic process (GO:0008152);; biological process: cellular process (GO:0009987);; molecular function: catalytic activity (GO:0003824);; molecular function: binding (GO:0005488)
ENSG00000177602	HASPIN	1.00884	132	1.816182	186	1.043978	103	4.885437	558	6.02023	623	5.597437	600	8.23E-17	-2.10400032	down	--	--	Molecular Function: protein kinase activity (GO:0004672);; Molecular Function: ATP binding (GO:0005524);;	K16315|0.0e+00|hsa:83903|K16315 serine/threonine-protein kinase haspin [EC:2.7.11.1] | (RefSeq) HASPIN, GSG2; histone H3 associated protein kinase	--	[D]	Cell cycle control, cell division, chromosome partitioning	Haspin like kinase domain	Serine/threonine-protein kinase haspin OS=Homo sapiens OX=9606 GN=HASPIN PE=1 SV=3	D	Cell cycle control, cell division, chromosome partitioning	serine/threonine-protein kinase haspin [Homo sapiens]	biological process: metabolic process (GO:0008152);; biological process: cellular process (GO:0009987);; molecular function: catalytic activity (GO:0003824);; molecular function: binding (GO:0005488)
ENSG00000109674	NEIL3	0.49196	56	0.777742	62	0.388306	31	3.146108	309	2.676503	239	1.524333	139	6.93E-11	-2.101130252	down	[L]	Replication, recombination and repair	Molecular Function: DNA secondary structure binding (GO:0000217);; Molecular Function: bubble DNA binding (GO:0000405);; Molecular Function: molecular_function (GO:0003674);; Molecular Function: nucleic acid binding (GO:0003676);; Molecular Function: DNA binding (GO:0003677);; Molecular Function: damaged DNA binding (GO:0003684);; Molecular Function: double-stranded DNA binding (GO:0003690);; Mol…	K10569|0.0e+00|hsa:55247|K10569 endonuclease VIII-like 3 | (RefSeq) NEIL3, FGP2, FPG2, NEI3, ZGRF3, hFPG2, hNEI3; nei like DNA glycosylase 3	Base excision repair (ko03410)	--	--	GRF zinc finger	Endonuclease 8-like 3 OS=Homo sapiens OX=9606 GN=NEIL3 PE=1 SV=3	L	Replication, recombination and repair	endonuclease 8-like 3 [Homo sapiens]	molecular function: binding (GO:0005488);; molecular function: catalytic activity (GO:0003824);; cellular component: cell (GO:0005623);; cellular component: cell part (GO:0044464);; cellular component: organelle (GO:0043226);; cellular component: organelle part (GO:0044422);; biological process: metabolic process (GO:0008152);; biological process: cellular process (GO:0009987);; biological proces…
ENSG00000142945	KIF2C	4.7099	630	7.163505	746	5.21441	520	22.046798	2551	23.086228	2390	23.733076	2605	4.02E-27	-2.084405596	down	--	--	Cellular Component: chromosome, centromeric region (GO:0000775);; Molecular Function: microtubule motor activity (GO:0003777);; Molecular Function: ATP binding (GO:0005524);; Cellular Component: microtubule (GO:0005874);; Biological Process: microtubule-based movement (GO:0007018);; Molecular Function: microtubule binding (GO:0008017);;	K10393|0.0e+00|hsa:11004|K10393 kinesin family member 2/24 | (RefSeq) KIF2C, CT139, KNSL6, MCAK; kinesin family member 2C	--	[Z]	Cytoskeleton	Kinesin motor domain	Kinesin-like protein KIF2C OS=Homo sapiens OX=9606 GN=KIF2C PE=1 SV=2	Z	Cytoskeleton	kinesin-like protein KIF2C isoform 3 [Homo sapiens]	cellular component: cell (GO:0005623);; cellular component: organelle (GO:0043226);; cellular component: organelle part (GO:0044422);; cellular component: cell part (GO:0044464);; molecular function: catalytic activity (GO:0003824);; molecular function: binding (GO:0005488);; cellular component: supramolecular complex (GO:0099080);; biological process: cellular process (GO:0009987);; biological p…
ENSG00000131351	HAUS8	2.671497	206	1.915387	119	1.978271	112	8.539008	548	10.775713	579	10.206458	582	2.96E-22	-2.082207853	down	--	--	Biological Process: G2/M transition of mitotic cell cycle (GO:0000086);; Biological Process: microtubule cytoskeleton organization (GO:0000226);; Biological Process: mitotic cell cycle (GO:0000278);; Cellular Component: cellular_component (GO:0005575);; Cellular Component: intracellular (GO:0005622);; Cellular Component: cell (GO:0005623);; Cellular Component: cytoplasm (GO:0005737);; Cellular Co…	K16591|1.8e-183|hsa:93323|K16591 HAUS augmin-like complex subunit 8 | (RefSeq) HAUS8, DGT4, HICE1, NY-SAR-48; HAUS augmin like complex subunit 8	--	--	--	--	HAUS augmin-like complex subunit 8 OS=Homo sapiens OX=9606 GN=HAUS8 PE=1 SV=3	Z	Cytoskeleton	sarcoma antigen NY-SAR-48, isoform CRA_a [Homo sapiens]	biological process: cellular process (GO:0009987);; biological process: single-organism process (GO:0044699);; biological process: cellular component organization or biogenesis (GO:0071840);; cellular component: cell (GO:0005623);; cellular component: cell part (GO:0044464);; cellular component: organelle (GO:0043226);; cellular component: organelle part (GO:0044422);; cellular component: macromo…
ENSG00000132016	C19orf57	0.197379	23	0.328959	30	0.290176	19	1.179949	93	1.374276	107	1.781897	134	3.60E-09	-2.062762179	down	--	--	Biological Process: multicellular organism development (GO:0007275);; Biological Process: biological_process (GO:0008150);; Biological Process: multicellular organismal process (GO:0032501);; Biological Process: developmental process (GO:0032502);; Biological Process: anatomical structure development (GO:0048856);;	--	--	--	--	Domain of unknown function (DUF4671)	Uncharacterized protein C19orf57 OS=Homo sapiens OX=9606 GN=C19orf57 PE=1 SV=2	S	Function unknown	uncharacterized protein C19orf57 isoform 3 [Homo sapiens]	biological process: multicellular organismal process (GO:0032501);; biological process: developmental process (GO:0032502);; biological process: single-organism process (GO:0044699)
ENSG00000119403	PHF19	4.251448	587	5.878391	644	5.332669	470	16.640463	2216	18.07157	2025	23.246857	2360	8.79E-28	-2.058454456	down	--	--	Biological Process: negative regulation of transcription from RNA polymerase II promoter (GO:0000122);; Biological Process: stem cell population maintenance (GO:0019827);; Molecular Function: methylated histone binding (GO:0035064);; Cellular Component: ESC/E(Z) complex (GO:0035098);; Molecular Function: metal ion binding (GO:0046872);; Biological Process: stem cell differentiation (GO:0048863);;…	K11486|0.0e+00|ggo:101124761|K11486 PHD finger protein 19 | (RefSeq) PHF19; PHD finger protein 19 isoform X1	--	[R]	General function prediction only	Polycomb-like MTF2 factor 2	PHD finger protein 19 OS=Homo sapiens OX=9606 GN=PHF19 PE=1 SV=1	S	Function unknown	PHD finger protein 19 isoform a [Homo sapiens]	biological process: biological regulation (GO:0065007);; biological process: multicellular organismal process (GO:0032501);; biological process: developmental process (GO:0032502);; biological process: single-organism process (GO:0044699);; molecular function: binding (GO:0005488);; cellular component: cell (GO:0005623);; cellular component: membrane-enclosed lumen (GO:0031974);; cellular compone…
ENSG00000157851	DPYSL5	1.793819	437	1.738281	331	2.005027	366	7.087876	1505	6.754033	1293	7.669653	1530	1.29E-32	-2.054721843	down	[F]	Nucleotide transport and metabolism	Cellular Component: cytoplasm (GO:0005737);; Biological Process: axon guidance (GO:0007411);; Molecular Function: microtubule binding (GO:0008017);; Molecular Function: hydrolase activity, acting on carbon-nitrogen (but not peptide) bonds (GO:0016810);;	K07529|0.0e+00|csab:103220622|K07529 dihydropyrimidinase-like 5 | (RefSeq) DPYSL5; dihydropyrimidinase like 5	Axon guidance (ko04360)	[F]	Nucleotide transport and metabolism	Amidohydrolase family	Dihydropyrimidinase-related protein 5 OS=Homo sapiens OX=9606 GN=DPYSL5 PE=1 SV=1	F	Nucleotide transport and metabolism	dihydropyrimidinase-related protein 5 [Homo sapiens]	cellular component: cell (GO:0005623);; cellular component: cell part (GO:0044464);; biological process: cellular process (GO:0009987);; biological process: multicellular organismal process (GO:0032501);; biological process: developmental process (GO:0032502);; biological process: locomotion (GO:0040011);; biological process: single-organism process (GO:0044699);; biological process: response to …
ENSG00000077152	UBE2T	11.101302	460	9.580572	311	10.142519	310	37.339157	1317	43.906555	1412	39.835261	1327	1.16E-34	-2.050385151	down	--	--	Molecular Function: ATP binding (GO:0005524);; Cellular Component: nucleoplasm (GO:0005654);; Cellular Component: nucleolus (GO:0005730);; Molecular Function: transferase activity (GO:0016740);;	K13960|5.1e-111|hsa:29089|K13960 ubiquitin-conjugating enzyme E2 T [EC:2.3.2.23] | (RefSeq) UBE2T, FANCT, HSPC150, PIG50; ubiquitin conjugating enzyme E2 T	Fanconi anemia pathway (ko03460)	[O]	Posttranslational modification, protein turnover, chaperones	Ubiquitin-conjugating enzyme	Ubiquitin-conjugating enzyme E2 T OS=Homo sapiens OX=9606 GN=UBE2T PE=1 SV=1	O	Posttranslational modification, protein turnover, chaperones	ubiquitin-conjugating enzyme E2 T isoform 1 [Homo sapiens]	molecular function: binding (GO:0005488);; cellular component: cell (GO:0005623);; cellular component: organelle (GO:0043226);; cellular component: organelle part (GO:0044422);; cellular component: cell part (GO:0044464);; molecular function: catalytic activity (GO:0003824)
ENSG00000104147	OIP5	2.168456	125	3.801292	172	3.267669	142	11.709022	591	13.48899	614	12.228545	574	3.07E-18	-2.050381789	down	--	--	Cellular Component: chromocenter (GO:0010369);; Cellular Component: nuclear speck (GO:0016607);; Cellular Component: intracellular membrane-bounded organelle (GO:0043231);; Molecular Function: metal ion binding (GO:0046872);;	K11565|3.7e-129|hsa:11339|K11565 opa-interacting protein 5 | (RefSeq) OIP5, 5730547N13Rik, CT86, LINT-25, MIS18B, MIS18beta, hMIS18beta; Opa interacting protein 5	--	--	--	Yippee zinc-binding/DNA-binding /Mis18, centromere assembly	Protein Mis18-beta OS=Homo sapiens OX=9606 GN=OIP5 PE=1 SV=2	B	Chromatin structure and dynamics	protein Mis18-beta isoform 1 [Homo sapiens]	cellular component: cell (GO:0005623);; cellular component: organelle (GO:0043226);; cellular component: organelle part (GO:0044422);; cellular component: cell part (GO:0044464);; cellular component: membrane-enclosed lumen (GO:0031974);; molecular function: binding (GO:0005488)
ENSG00000100162	CENPM	4.352732	174	4.794467	162	6.419742	198	18.892062	707	17.601954	589	24.324491	852	1.18E-17	-2.048238889	down	--	--	Cellular Component: cytosol (GO:0005829);;	K11505|4.6e-77|hsa:79019|K11505 centromere protein M | (RefSeq) CENPM, C22orf18, CENP-M, PANE1; centromere protein M	--	--	--	Centromere protein M (CENP-M)	Centromere protein M OS=Homo sapiens OX=9606 GN=CENPM PE=1 SV=1	S	Function unknown	PREDICTED: centromere protein M isoform X1 [Mandrillus leucophaeus]	cellular component: cell (GO:0005623);; cellular component: cell part (GO:0044464)
ENSG00000104889	RNASEH2A	8.110848	1040	9.894804	979	8.251192	769	29.640735	3284	31.890849	3227	39.692191	4112	1.88E-27	-2.046564954	down	[L]	Replication, recombination and repair	Molecular Function: RNA binding (GO:0003723);; Molecular Function: RNA-DNA hybrid ribonuclease activity (GO:0004523);;	K10743|1.5e-170|hsa:10535|K10743 ribonuclease H2 subunit A [EC:3.1.26.4] | (RefSeq) RNASEH2A, AGS4, JUNB, RNASEHI, RNHIA, RNHL, THSD8; ribonuclease H2 subunit A	DNA replication (ko03030)	[L]	Replication, recombination and repair	Ribonuclease HII	Ribonuclease H2 subunit A OS=Homo sapiens OX=9606 GN=RNASEH2A PE=1 SV=2	L	Replication, recombination and repair	ribonuclease H2 subunit A [Homo sapiens]	molecular function: binding (GO:0005488);; biological process: metabolic process (GO:0008152);; biological process: cellular process (GO:0009987);; molecular function: catalytic activity (GO:0003824)
ENSG00000175643	RMI2	5.019334	325	7.23699	374	4.855228	229	22.468256	1251	21.59322	1135	22.540105	1180	5.18E-23	-2.030163881	down	--	--	--	K15365|7.1e-22|aju:113594854|K15365 RecQ-mediated genome instability protein 2 | (RefSeq) RMI2; recQ-mediated genome instability protein 2	Fanconi anemia pathway (ko03460)	--	--	RecQ-mediated genome instability protein 2	RecQ-mediated genome instability protein 2 OS=Homo sapiens OX=9606 GN=RMI2 PE=1 SV=2	--	--	C16orf75 protein [Homo sapiens]	--
ENSG00000145386	CCNA2	5.765813	754	6.928193	709	6.93486	680	26.741854	3050	26.682232	2759	20.992965	2251	4.47E-35	-2.021976083	down	--	--	Cellular Component: host cell nucleus (GO:0042025);;	K06627|1.0e-244|hsa:890|K06627 cyclin-A | (RefSeq) CCNA2, CCN1, CCNA; cyclin A2	Cell cycle (ko04110);; AMPK signaling pathway (ko04152);; Cellular senescence (ko04218);; Progesterone-mediated oocyte maturation (ko04914);; Hepatitis B (ko05161);; Human papillomavirus infection (ko05165);; Human T-cell leukemia virus 1 infection (ko05166);; Epstein-Barr virus infection (ko05169);; Pathways in cancer (ko05200);; Transcriptional misregulation in cancer (ko05202);; Viral carcinog…	[D]	Cell cycle control, cell division, chromosome partitioning	N-terminal region of cyclin_N	Cyclin-A2 OS=Homo sapiens OX=9606 GN=CCNA2 PE=1 SV=2	D	Cell cycle control, cell division, chromosome partitioning	cyclin-A2 [Homo sapiens]	cellular component: other organism (GO:0044215);; cellular component: other organism part (GO:0044217)
ENSG00000134222	PSRC1	2.189603	181	2.942155	185	2.565607	151	9.58073	669	8.867012	565	11.22975	716	1.26E-21	-2.001234788	down	--	--	Biological Process: microtubule bundle formation (GO:0001578);; Cellular Component: nucleoplasm (GO:0005654);; Cellular Component: spindle (GO:0005819);; Cellular Component: cytosol (GO:0005829);; Molecular Function: microtubule binding (GO:0008017);; Biological Process: negative regulation of cell growth (GO:0030308);; Cellular Component: midbody (GO:0030496);; Biological Process: positive regul…	K21443|2.8e-171|hsa:84722|K21443 proline/serine-rich coiled-coil protein 1 | (RefSeq) PSRC1, DDA3, FP3214; proline and serine rich coiled-coil 1	--	--	--	G-2 and S-phase expressed 1	Proline/serine-rich coiled-coil protein 1 OS=Homo sapiens OX=9606 GN=PSRC1 PE=1 SV=1	Z	Cytoskeleton	proline/serine-rich coiled-coil protein 1 isoform c [Homo sapiens]	biological process: cellular process (GO:0009987);; biological process: cellular component organization or biogenesis (GO:0071840);; cellular component: cell (GO:0005623);; cellular component: organelle (GO:0043226);; cellular component: organelle part (GO:0044422);; cellular component: cell part (GO:0044464);; molecular function: binding (GO:0005488);; biological process: biological regulation (…
ENSG00000075218	GTSE1	3.442946	501	4.276067	487	3.733805	407	14.041478	1782	14.018868	1613	13.508957	1611	1.11E-34	-1.968721641	down	--	--	Biological Process: cell cycle checkpoint (GO:0000075);; Biological Process: DNA damage checkpoint (GO:0000077);; Biological Process: mitotic cell cycle (GO:0000278);; Cellular Component: cellular_component (GO:0005575);; Cellular Component: intracellular (GO:0005622);; Cellular Component: cell (GO:0005623);; Cellular Component: nucleus (GO:0005634);; Cellular Component: nucleoplasm (GO:0005654);…	K10129|0.0e+00|hsa:51512|K10129 G-2 and S-phase expressed protein 1 | (RefSeq) GTSE1, B99; G2 and S-phase expressed 1	p53 signaling pathway (ko04115)	--	--	G-2 and S-phase expressed 1	G2 and S phase-expressed protein 1 OS=Homo sapiens OX=9606 GN=GTSE1 PE=1 SV=3	S	Function unknown	G-2 and S-phase expressed 1, isoform CRA_a [Homo sapiens]	biological process: cellular process (GO:0009987);; biological process: biological regulation (GO:0065007);; biological process: response to stimulus (GO:0050896);; biological process: single-organism process (GO:0044699);; cellular component: cell (GO:0005623);; cellular component: cell part (GO:0044464);; cellular component: organelle (GO:0043226);; cellular component: organelle part (GO:004442…
Homo_sapiens_newGene_2991	--	0.206117	124	0.402751	189	0.339845	153	1.54778	808	1.395431	660	0.843716	414	1.35E-12	-1.96774283	down	--	--	--	--	--	--	--	--	--	--	--	--	--
ENSG00000112118	MCM3	16.861118	2446	18.578458	2098	17.703313	1910	65.446974	8208	64.394661	7342	60.889642	7182	1.73E-51	-1.964427586	down	[L]	Replication, recombination and repair	Molecular Function: DNA binding (GO:0003677);; Molecular Function: DNA helicase activity (GO:0003678);; Molecular Function: ATP binding (GO:0005524);; Cellular Component: nucleus (GO:0005634);; Biological Process: DNA replication initiation (GO:0006270);; Cellular Component: MCM complex (GO:0042555);;	K02541|0.0e+00|pps:100980176|K02541 DNA replication licensing factor MCM3 [EC:3.6.4.12] | (RefSeq) MCM3; minichromosome maintenance complex component 3	DNA replication (ko03030);; Cell cycle (ko04110)	[L]	Replication, recombination and repair	MCM P-loop domain	DNA replication licensing factor MCM3 OS=Homo sapiens OX=9606 GN=MCM3 PE=1 SV=3	L	Replication, recombination and repair	MCM3 minichromosome maintenance deficient 3 (S. cerevisiae), isoform CRA_b [Homo sapiens]	molecular function: binding (GO:0005488);; molecular function: catalytic activity (GO:0003824);; cellular component: cell (GO:0005623);; cellular component: organelle (GO:0043226);; cellular component: cell part (GO:0044464);; biological process: metabolic process (GO:0008152);; biological process: cellular process (GO:0009987);; cellular component: macromolecular complex (GO:0032991)
ENSG00000137404	NRM	3.258841	235	2.954342	163	3.141677	157	9.817361	592	11.740194	664	12.870394	736	2.92E-21	-1.961113882	down	[O]	Posttranslational modification, protein turnover, chaperones	Cellular Component: integral component of membrane (GO:0016021);; Cellular Component: nuclear membrane (GO:0031965);;	--	--	--	--	--	Nurim OS=Homo sapiens OX=9606 GN=NRM PE=1 SV=1	U	Intracellular trafficking, secretion, and vesicular transport	nurim isoform 1 [Homo sapiens]	cellular component: membrane (GO:0016020);; cellular component: membrane part (GO:0044425);; cellular component: cell (GO:0005623);; cellular component: organelle (GO:0043226);; cellular component: organelle part (GO:0044422);; cellular component: cell part (GO:0044464)
ENSG00000166451	CENPN	4.772681	432	5.656736	400	4.670465	311	19.577785	1461	18.310011	1411	15.926333	1180	2.93E-31	-1.9509112	down	--	--	Biological Process: chromosome segregation (GO:0007059);; Biological Process: kinetochore assembly (GO:0051382);;	K11506|3.1e-193|hsa:55839|K11506 centromere protein N | (RefSeq) CENPN, BM039, C16orf60, CENP-N, ICEN32; centromere protein N	--	--	--	Kinetochore protein CHL4 like	Centromere protein N OS=Homo sapiens OX=9606 GN=CENPN PE=1 SV=2	S	Function unknown	centromere protein N isoform 2 [Homo sapiens]	biological process: cellular process (GO:0009987);; biological process: single-organism process (GO:0044699);; biological process: cellular component organization or biogenesis (GO:0071840)
ENSG00000163918	RFC4	8.09642	486	7.414693	344	6.61198	303	23.731478	1303	29.208012	1403	23.881599	1237	3.43E-31	-1.945479564	down	[L]	Replication, recombination and repair	Molecular Function: DNA binding (GO:0003677);; Molecular Function: ATP binding (GO:0005524);; Cellular Component: nucleoplasm (GO:0005654);; Biological Process: DNA replication (GO:0006260);;	K10755|7.5e-201|hsa:5984|K10755 replication factor C subunit 2/4 | (RefSeq) RFC4, A1, RFC37; replication factor C subunit 4	DNA replication (ko03030);; Nucleotide excision repair (ko03420);; Mismatch repair (ko03430)	[L]	Replication, recombination and repair	Replication factor C C-terminal domain	Replication factor C subunit 4 OS=Homo sapiens OX=9606 GN=RFC4 PE=1 SV=2	L	Replication, recombination and repair	replication factor C subunit 4 [Homo sapiens]	molecular function: binding (GO:0005488);; cellular component: cell (GO:0005623);; cellular component: organelle (GO:0043226);; cellular component: organelle part (GO:0044422);; cellular component: cell part (GO:0044464);; biological process: metabolic process (GO:0008152);; biological process: cellular process (GO:0009987)
ENSG00000137135	ARHGEF39	1.2127	212	0.938118	130	0.856301	116	3.907362	535	3.927348	516	4.102509	564	4.48E-20	-1.940228269	down	--	--	Molecular Function: guanyl-nucleotide exchange factor activity (GO:0005085);;	K23798|2.6e-167|hsa:84904|K23798 Rho guanine nucleotide exchange factor 39 | (RefSeq) ARHGEF39, C9orf100; Rho guanine nucleotide exchange factor 39	--	--	--	RhoGEF domain	Rho guanine nucleotide exchange factor 39 OS=Homo sapiens OX=9606 GN=ARHGEF39 PE=1 SV=1	T	Signal transduction mechanisms	ARHGEF39 isoform 1 [Pan troglodytes]	biological process: biological regulation (GO:0065007);; molecular function: molecular function regulator (GO:0098772)
ENSG00000092853	CLSPN	0.712709	152	1.009491	170	0.670977	104	4.17747	732	3.814563	609	1.94316	315	8.65E-12	-1.936820771	down	--	--	--	K10685|8.7e-13|lak:106160449|K10685 ubiquitin-like 1-activating enzyme E1 B [EC:6.2.1.45] | (RefSeq) SUMO-activating enzyme subunit 2	Ubiquitin mediated proteolysis (ko04120)	[DT]	Cell cycle control, cell division, chromosome partitioning;; Signal transduction mechanisms	--	Claspin OS=Homo sapiens OX=9606 GN=CLSPN PE=1 SV=3	--	--	claspin isoform 3 [Homo sapiens]	--
ENSG00000283526	PRRT1B	0.321365	20	0.089173	5	0.123248	6	0.834578	45	1.150342	56	1.082713	55	1.11E-05	-1.928320743	down	--	--	Cellular Component: integral component of membrane (GO:0016021);;	--	--	--	--	Interferon-induced transmembrane protein	Proline rich transmembrane protein 1B OS=Homo sapiens OX=9606 GN=PRRT1B PE=3 SV=1	S	Function unknown	RecName: Full=Proline rich transmembrane protein 1B [Homo sapiens]	cellular component: membrane (GO:0016020);; cellular component: membrane part (GO:0044425)
Homo_sapiens_newGene_2164	--	0.729376	44	2.100231	70	0.315591	28	3.744396	188	4.443454	210	4.329561	166	6.01E-09	-1.903930432	down	--	--	--	--	--	--	--	--	--	--	--	--	--
ENSG00000117632	STMN1	58.018949	4053	51.744052	2816	55.413046	2907	168.845634	10354	190.432829	10587	200.45856	11846	5.25E-33	-1.898739521	down	--	--	Biological Process: regulation of microtubule polymerization or depolymerization (GO:0031110);;	K04381|4.2e-57|aju:106977621|K04381 stathmin | (RefSeq) STMN1; stathmin	MAPK signaling pathway (ko04010);; MicroRNAs in cancer (ko05206)	--	--	Stathmin family	Stathmin OS=Homo sapiens OX=9606 GN=STMN1 PE=1 SV=3	S	Function unknown	stathmin [Rhinopithecus roxellana]	biological process: biological regulation (GO:0065007)
ENSG00000164611	PTTG1	15.861167	594	17.137605	507	17.420968	481	53.202136	1671	59.30312	1683	68.274346	2053	4.31E-25	-1.897283424	down	--	--	Cellular Component: nucleus (GO:0005634);; Cellular Component: cytoplasm (GO:0005737);; Biological Process: chromosome organization (GO:0051276);;	K06635|7.5e-110|hsa:9232|K06635 securin | (RefSeq) PTTG1, EAP1, HPTTG, PTTG, TUTR1; PTTG1 regulator of sister chromatid separation, securin	Cell cycle (ko04110);; Oocyte meiosis (ko04114);; Human T-cell leukemia virus 1 infection (ko05166)	--	--	Securin sister-chromatid separation inhibitor	Securin OS=Homo sapiens OX=9606 GN=PTTG1 PE=1 SV=1	K	Transcription	securin [Homo sapiens]	cellular component: cell (GO:0005623);; cellular component: organelle (GO:0043226);; cellular component: cell part (GO:0044464);; biological process: cellular process (GO:0009987);; biological process: cellular component organization or biogenesis (GO:0071840)
ENSG00000113368	LMNB1	8.906525	1196	8.99544	938	8.726487	874	30.70984	3611	30.433618	3337	27.975631	3083	6.52E-46	-1.891296776	down	--	--	Cellular Component: intermediate filament (GO:0005882);;	K07611|2.0e-160|hsa:4001|K07611 lamin B | (RefSeq) LMNB1, ADLD, LMN, LMN2, LMNB; lamin B1	Apoptosis (ko04210)	[DY]	Cell cycle control, cell division, chromosome partitioning;; Nuclear structure	Intermediate filament protein	Lamin-B1 OS=Homo sapiens OX=9606 GN=LMNB1 PE=1 SV=2	--	--	lamin B1, isoform CRA_a [Homo sapiens]	cellular component: cell (GO:0005623);; cellular component: organelle (GO:0043226);; cellular component: organelle part (GO:0044422);; cellular component: cell part (GO:0044464);; cellular component: supramolecular complex (GO:0099080)
ENSG00000111602	TIMELESS	8.665413	1998	9.539209	1682	7.659714	1318	28.465141	5876	28.634716	5095	29.672983	5679	1.94E-35	-1.885720146	down	--	--	Biological Process: negative regulation of transcription from RNA polymerase II promoter (GO:0000122);; Cellular Component: nuclear chromosome (GO:0000228);; Cellular Component: chromatin (GO:0000785);; Cellular Component: nuclear chromatin (GO:0000790);; Biological Process: urogenital system development (GO:0001655);; Biological Process: ureteric bud development (GO:0001657);; Biological Process…	K03155|0.0e+00|hsa:8914|K03155 timeless | (RefSeq) TIMELESS, TIM, TIM1, hTIM; timeless circadian regulator	--	[L]	Replication, recombination and repair	Timeless protein	Protein timeless homolog OS=Homo sapiens OX=9606 GN=TIMELESS PE=1 SV=2	K	Transcription	protein timeless homolog isoform 1 [Homo sapiens]	biological process: biological regulation (GO:0065007);; cellular component: cell (GO:0005623);; cellular component: organelle (GO:0043226);; cellular component: organelle part (GO:0044422);; cellular component: cell part (GO:0044464);; cellular component: membrane-enclosed lumen (GO:0031974);; biological process: multicellular organismal process (GO:0032501);; biological process: developmental p…
ENSG00000188486	H2AFX	24.146546	1757	28.561109	1636	22.859218	1243	75.041608	4771	79.441203	4619	107.129044	6394	5.93E-21	-1.884819983	down	--	--	Cellular Component: nucleosome (GO:0000786);; Molecular Function: DNA binding (GO:0003677);; Cellular Component: nucleus (GO:0005634);; Molecular Function: protein heterodimerization activity (GO:0046982);;	K11251|2.2e-71|cjc:100415512|K11251 histone H2A | (RefSeq) H2AFX; H2A histone family, member X	Necroptosis (ko04217);; Alcoholism (ko05034);; Systemic lupus erythematosus (ko05322)	[B]	Chromatin structure and dynamics	C-terminus of histone H2A	Histone H2AX OS=Homo sapiens OX=9606 GN=H2AX PE=1 SV=2	B	Chromatin structure and dynamics	histone H2A.x [Macaca mulatta]	cellular component: cell (GO:0005623);; cellular component: macromolecular complex (GO:0032991);; cellular component: organelle (GO:0043226);; cellular component: organelle part (GO:0044422);; cellular component: cell part (GO:0044464);; molecular function: binding (GO:0005488)
ENSG00000085999	RAD54L	0.658048	78	0.909441	104	0.708312	70	3.077041	385	2.352362	253	2.458062	289	1.95E-12	-1.882646206	down	[S]	Function unknown	Molecular Function: ATP binding (GO:0005524);;	K10875|0.0e+00|hsa:8438|K10875 DNA repair and recombination protein RAD54 and RAD54-like protein [EC:3.6.4.-] | (RefSeq) RAD54L, HR54, RAD54A, hHR54, hRAD54; RAD54 like	Homologous recombination (ko03440)	[L]	Replication, recombination and repair	SNF2 family N-terminal domain	DNA repair and recombination protein RAD54-like OS=Homo sapiens OX=9606 GN=RAD54L PE=1 SV=2	L	Replication, recombination and repair	DNA repair and recombination protein RAD54-like isoform 1 [Homo sapiens]	molecular function: binding (GO:0005488)
ENSG00000123485	HJURP	3.587814	534	4.575641	534	3.061296	341	13.036261	1674	14.202344	1649	11.971286	1443	1.33E-23	-1.875620124	down	--	--	Cellular Component: nucleoplasm (GO:0005654);; Cellular Component: nucleolus (GO:0005730);; Cellular Component: mitochondrion (GO:0005739);; Molecular Function: histone binding (GO:0042393);;	--	--	--	--	Holliday junction recognition protein-associated repeat	Holliday junction recognition protein OS=Homo sapiens OX=9606 GN=HJURP PE=1 SV=2	B	Chromatin structure and dynamics	Holliday junction recognition protein isoform a [Homo sapiens]	cellular component: cell (GO:0005623);; cellular component: organelle (GO:0043226);; cellular component: organelle part (GO:0044422);; cellular component: cell part (GO:0044464);; molecular function: binding (GO:0005488)
ENSG00000115850	LCT	0.039489	12	0.07828	18	0	0	0.365253	94	0.266363	62	0.182862	44	0.000100168	-1.874486284	down	[G]	Carbohydrate transport and metabolism	Molecular Function: hydrolase activity, hydrolyzing O-glycosyl compounds (GO:0004553);; Biological Process: carbohydrate metabolic process (GO:0005975);;	K01229|0.0e+00|hsa:3938|K01229 lactase-phlorizin hydrolase [EC:3.2.1.108 3.2.1.62] | (RefSeq) LCT, LAC, LPH, LPH1; lactase	Galactose metabolism (ko00052);; Carbohydrate digestion and absorption (ko04973)	[G]	Carbohydrate transport and metabolism	Glycosyl hydrolase family 1	Lactase-phlorizin hydrolase OS=Homo sapiens OX=9606 GN=LCT PE=1 SV=3	G	Carbohydrate transport and metabolism	lactase-phlorizin hydrolase preproprotein [Homo sapiens]	molecular function: catalytic activity (GO:0003824);; biological process: metabolic process (GO:0008152)
ENSG00000170312	CDK1	7.531256	658	9.256745	643	8.166039	544	31.888677	2450	32.099898	2244	22.099129	1610	1.54E-24	-1.873785177	down	[R]	General function prediction only	Molecular Function: protein serine/threonine kinase activity (GO:0004674);; Molecular Function: ATP binding (GO:0005524);; Cellular Component: nucleoplasm (GO:0005654);; Cellular Component: cytosol (GO:0005829);; Biological Process: cell division (GO:0051301);;	K02087|7.3e-170|ggo:101131389|K02087 cyclin-dependent kinase 1 [EC:2.7.11.22 2.7.11.23] | (RefSeq) CDK1; cyclin-dependent kinase 1	Cell cycle (ko04110);; Oocyte meiosis (ko04114);; p53 signaling pathway (ko04115);; Cellular senescence (ko04218);; Gap junction (ko04540);; Progesterone-mediated oocyte maturation (ko04914);; Human immunodeficiency virus 1 infection (ko05170);; Viral carcinogenesis (ko05203)	[R]	General function prediction only	Protein kinase domain	Cyclin-dependent kinase 1 OS=Homo sapiens OX=9606 GN=CDK1 PE=1 SV=3	D	Cell cycle control, cell division, chromosome partitioning	cell division cycle 2, G1 to S and G2 to M, isoform CRA_a [Homo sapiens]	biological process: metabolic process (GO:0008152);; biological process: cellular process (GO:0009987);; molecular function: catalytic activity (GO:0003824);; molecular function: binding (GO:0005488);; cellular component: cell (GO:0005623);; cellular component: organelle (GO:0043226);; cellular component: organelle part (GO:0044422);; cellular component: cell part (GO:0044464);; biological proces…
ENSG00000198435	NRARP	0.888202	74	1.076448	70	0.822976	51	2.815664	204	3.339601	219	4.00158	272	5.09E-12	-1.872744088	down	--	--	--	K17566|4.1e-12|els:105012895|K17566 protein phosphatase 1 regulatory subunit 27 | (RefSeq) protein phosphatase 1 regulatory subunit 12B	--	[OT]	Posttranslational modification, protein turnover, chaperones;; Signal transduction mechanisms	Ankyrin repeats (3 copies)	Notch-regulated ankyrin repeat-containing protein OS=Homo sapiens OX=9606 GN=NRARP PE=1 SV=1	--	--	notch-regulated ankyrin repeat-containing protein [Homo sapiens]	--
ENSG00000128951	DUT	12.62729	866	11.544004	668	12.156508	631	34.629496	2487	37.334863	2413	33.189607	2204	3.55E-41	-1.867258355	down	[FV]	Nucleotide transport and metabolism;; Defense mechanisms	Molecular Function: magnesium ion binding (GO:0000287);; Molecular Function: dUTP diphosphatase activity (GO:0004170);; Cellular Component: nucleoplasm (GO:0005654);; Biological Process: dUMP biosynthetic process (GO:0006226);; Biological Process: dUTP catabolic process (GO:0046081);;	K01520|1.3e-138|hsa:1854|K01520 dUTP pyrophosphatase [EC:3.6.1.23] | (RefSeq) DUT, dUTPase; deoxyuridine triphosphatase	Pyrimidine metabolism (ko00240);; Drug metabolism - other enzymes (ko00983)	[F]	Nucleotide transport and metabolism	dUTPase	Deoxyuridine 5'-triphosphate nucleotidohydrolase, mitochondrial OS=Homo sapiens OX=9606 GN=DUT PE=1 SV=4	F	Nucleotide transport and metabolism	deoxyuridine 5'-triphosphate nucleotidohydrolase, mitochondrial isoform 1 precursor [Homo sapiens]	molecular function: binding (GO:0005488);; molecular function: catalytic activity (GO:0003824);; cellular component: cell (GO:0005623);; cellular component: organelle (GO:0043226);; cellular component: organelle part (GO:0044422);; cellular component: cell part (GO:0044464);; biological process: metabolic process (GO:0008152);; biological process: cellular process (GO:0009987);; biological proces…
ENSG00000101003	GINS1	5.232991	794	5.775321	686	5.286779	601	16.962444	2247	19.185419	2304	18.595247	2315	3.05E-34	-1.866300719	down	--	--	Cellular Component: GINS complex (GO:0000811);; Biological Process: DNA replication (GO:0006260);;	K10732|5.1e-111|ggo:101127635|K10732 GINS complex subunit 1 | (RefSeq) GINS1; DNA replication complex GINS protein PSF1 isoform X1	--	[L]	Replication, recombination and repair	--	DNA replication complex GINS protein PSF1 OS=Homo sapiens OX=9606 GN=GINS1 PE=1 SV=1	L	Replication, recombination and repair	DNA replication complex GINS protein PSF1 [Homo sapiens]	cellular component: cell (GO:0005623);; cellular component: membrane-enclosed lumen (GO:0031974);; cellular component: macromolecular complex (GO:0032991);; cellular component: organelle (GO:0043226);; cellular component: organelle part (GO:0044422);; cellular component: cell part (GO:0044464);; biological process: metabolic process (GO:0008152);; biological process: cellular process (GO:0009987)
ENSG00000173207	CKS1B	42.510804	1529	41.875734	1185	41.028259	1111	134.72938	4229	138.471854	3940	146.973167	4331	3.85E-38	-1.862706554	down	--	--	Biological Process: cell cycle (GO:0007049);; Molecular Function: kinase activity (GO:0016301);; Molecular Function: cyclin-dependent protein serine/threonine kinase regulator activity (GO:0016538);; Biological Process: cell division (GO:0051301);;	K02219|2.7e-29|aju:106988394|K02219 cyclin-dependent kinase regulatory subunit CKS1 | (RefSeq) CKS1B; cyclin-dependent kinases regulatory subunit 1	Pathways in cancer (ko05200);; Small cell lung cancer (ko05222)	[D]	Cell cycle control, cell division, chromosome partitioning	Cyclin-dependent kinase regulatory subunit	Cyclin-dependent kinases regulatory subunit 1 OS=Homo sapiens OX=9606 GN=CKS1B PE=1 SV=1	D	Cell cycle control, cell division, chromosome partitioning	PNAS-18 [Homo sapiens]	biological process: cellular process (GO:0009987);; biological process: single-organism process (GO:0044699);; molecular function: catalytic activity (GO:0003824);; biological process: biological regulation (GO:0065007);; molecular function: molecular function regulator (GO:0098772)
ENSG00000160949	TONSL	7.391914	1527	7.854655	1279	6.899209	1087	24.599771	4513	22.358456	3716	26.551567	4575	1.70E-31	-1.860573227	down	--	--	Cellular Component: nuclear chromosome (GO:0000228);; Biological Process: double-strand break repair via homologous recombination (GO:0000724);; Biological Process: recombinational repair (GO:0000725);; Cellular Component: ESCRT I complex (GO:0000813);; Molecular Function: molecular_function (GO:0003674);; Molecular Function: transcription cofactor activity (GO:0003712);; Molecular Function: tran…	K09257|0.0e+00|hsa:4796|K09257 NF-kappa-B inhibitor-like protein 2 | (RefSeq) TONSL, IKBR, NFKBIL2, SEMDSP; tonsoku like, DNA repair protein	--	[R]	General function prediction only	Ankyrin repeats (3 copies)	Tonsoku-like protein OS=Homo sapiens OX=9606 GN=TONSL PE=1 SV=2	S	Function unknown	tonsoku-like protein [Homo sapiens]	cellular component: cell (GO:0005623);; cellular component: organelle (GO:0043226);; cellular component: organelle part (GO:0044422);; cellular component: cell part (GO:0044464);; biological process: metabolic process (GO:0008152);; biological process: cellular process (GO:0009987);; biological process: response to stimulus (GO:0050896);; cellular component: membrane (GO:0016020);; cellular compo…
ENSG00000049541	RFC2	14.890275	1114	16.570153	1009	16.158061	940	52.702577	3196	55.85406	3362	61.248726	3586	6.77E-30	-1.860316364	down	[L]	Replication, recombination and repair	Molecular Function: DNA binding (GO:0003677);; Molecular Function: ATP binding (GO:0005524);; Biological Process: DNA replication (GO:0006260);;	K10755|1.9e-201|hsa:5982|K10755 replication factor C subunit 2/4 | (RefSeq) RFC2, RFC40; replication factor C subunit 2	DNA replication (ko03030);; Nucleotide excision repair (ko03420);; Mismatch repair (ko03430)	[L]	Replication, recombination and repair	Replication factor C C-terminal domain	Replication factor C subunit 2 OS=Homo sapiens OX=9606 GN=RFC2 PE=1 SV=3	L	Replication, recombination and repair	replication factor C subunit 2 isoform 1 [Homo sapiens]	molecular function: binding (GO:0005488);; biological process: metabolic process (GO:0008152);; biological process: cellular process (GO:0009987)
ENSG00000154146	NRGN	0.253563	14	0.061771	3	0.354368	17	1.409964	71	0.876216	43	1.169621	60	3.26E-05	-1.849665931	down	--	--	Molecular Function: calmodulin binding (GO:0005516);; Molecular Function: phosphatidylinositol-3,4,5-trisphosphate binding (GO:0005547);; Cellular Component: nucleus (GO:0005634);; Biological Process: associative learning (GO:0008306);; Cellular Component: trans-Golgi network transport vesicle membrane (GO:0012510);; Cellular Component: postsynaptic density of dendrite (GO:0014069);; Molecular Fu…	--	--	--	--	IQ calmodulin-binding motif	Neurogranin OS=Homo sapiens OX=9606 GN=NRGN PE=1 SV=1	T	Signal transduction mechanisms	neurogranin isoform X1 [Aotus nancymaae]	molecular function: binding (GO:0005488);; cellular component: cell (GO:0005623);; cellular component: organelle (GO:0043226);; cellular component: cell part (GO:0044464);; biological process: behavior (GO:0007610);; biological process: multicellular organismal process (GO:0032501);; biological process: single-organism process (GO:0044699);; cellular component: membrane (GO:0016020);; cellular co…
ENSG00000183763	TRAIP	1.576726	141	2.979269	179	1.559045	111	6.090876	492	6.092763	452	7.350728	550	3.58E-14	-1.84859399	down	--	--	Biological Process: regulation of cytokine-mediated signaling pathway (GO:0001959);; Biological Process: negative regulation of cytokine-mediated signaling pathway (GO:0001960);; Biological Process: apoptotic process (GO:0006915);; Biological Process: cell communication (GO:0007154);; Biological Process: signal transduction (GO:0007165);; Biological Process: biological_process (GO:0008150);; Biol…	K11985|2.6e-246|hsa:10293|K11985 TRAF-interacting protein [EC:2.3.2.27] | (RefSeq) TRAIP, RNF206, SCKL9, TRIP; TRAF interacting protein	--	[O]	Posttranslational modification, protein turnover, chaperones	Ring finger domain	E3 ubiquitin-protein ligase TRAIP OS=Homo sapiens OX=9606 GN=TRAIP PE=1 SV=1	O	Posttranslational modification, protein turnover, chaperones	E3 ubiquitin-protein ligase TRAIP [Homo sapiens]	biological process: biological regulation (GO:0065007);; biological process: cellular process (GO:0009987);; biological process: single-organism process (GO:0044699);; biological process: signaling (GO:0023052);; biological process: response to stimulus (GO:0050896)
ENSG00000157456	CCNB2	11.300719	837	10.685573	628	11.270003	629	36.938784	2362	37.853055	2188	35.771259	2149	7.55E-39	-1.830267673	down	--	--	Cellular Component: cytosol (GO:0005829);; Cellular Component: host cell nucleus (GO:0042025);;	K21770|4.1e-202|hsa:9133|K21770 G2/mitotic-specific cyclin-B2 | (RefSeq) CCNB2, HsT17299; cyclin B2	FoxO signaling pathway (ko04068);; Cell cycle (ko04110);; Oocyte meiosis (ko04114);; p53 signaling pathway (ko04115);; Cellular senescence (ko04218);; Progesterone-mediated oocyte maturation (ko04914);; Human T-cell leukemia virus 1 infection (ko05166);; Human immunodeficiency virus 1 infection (ko05170)	[D]	Cell cycle control, cell division, chromosome partitioning	Cyclin, N-terminal domain	G2/mitotic-specific cyclin-B2 OS=Homo sapiens OX=9606 GN=CCNB2 PE=1 SV=1	D	Cell cycle control, cell division, chromosome partitioning	cyclin B2 [Homo sapiens]	cellular component: cell (GO:0005623);; cellular component: cell part (GO:0044464);; cellular component: other organism (GO:0044215);; cellular component: other organism part (GO:0044217)
ENSG00000164109	MAD2L1	3.165578	643	3.207605	503	2.50023	425	9.559436	1833	9.955536	1836	8.066956	1389	5.51E-28	-1.824836386	down	--	--	--	K02537|7.6e-110|cjc:100390703|K02537 mitotic spindle assembly checkpoint protein MAD2 | (RefSeq) MAD2L1; MAD2 mitotic arrest deficient-like 1 (yeast)	Cell cycle (ko04110);; Oocyte meiosis (ko04114);; Progesterone-mediated oocyte maturation (ko04914);; Human T-cell leukemia virus 1 infection (ko05166)	[DZ]	Cell cycle control, cell division, chromosome partitioning;; Cytoskeleton	HORMA domain	Mitotic spindle assembly checkpoint protein MAD2A OS=Homo sapiens OX=9606 GN=MAD2L1 PE=1 SV=1	--	--	mitotic spindle assembly checkpoint protein MAD2A [Macaca mulatta]	--
ENSG00000146410	MTFR2	1.834323	154	1.529239	99	1.41448	88	6.292403	435	6.304958	402	4.240632	283	1.46E-14	-1.804459096	down	--	--	Biological Process: mitochondrial fission (GO:0000266);; Cellular Component: cellular_component (GO:0005575);; Cellular Component: intracellular (GO:0005622);; Cellular Component: cell (GO:0005623);; Cellular Component: cytoplasm (GO:0005737);; Cellular Component: mitochondrion (GO:0005739);; Biological Process: generation of precursor metabolites and energy (GO:0006091);; Biological Process: org…	--	--	--	--	Mitochondrial fission regulator	Mitochondrial fission regulator 2 OS=Homo sapiens OX=9606 GN=MTFR2 PE=1 SV=2	S	Function unknown	mitochondrial fission regulator 2 isoform a [Homo sapiens]	biological process: cellular process (GO:0009987);; biological process: cellular component organization or biogenesis (GO:0071840);; cellular component: cell (GO:0005623);; cellular component: cell part (GO:0044464);; cellular component: organelle (GO:0043226);; biological process: metabolic process (GO:0008152);; biological process: single-organism process (GO:0044699)
ENSG00000167670	CHAF1A	5.201313	782	6.885542	834	4.774706	551	18.445924	2375	17.828291	2169	18.615674	2343	6.10E-22	-1.786959759	down	--	--	Cellular Component: nuclear chromosome (GO:0000228);; Cellular Component: chromatin (GO:0000785);; Cellular Component: nuclear chromatin (GO:0000790);; Molecular Function: molecular_function (GO:0003674);; Molecular Function: chromatin binding (GO:0003682);; Molecular Function: binding (GO:0005488);; Molecular Function: protein binding (GO:0005515);; Cellular Component: cellular_component (GO:000…	K10750|0.0e+00|hsa:10036|K10750 chromatin assembly factor 1 subunit A | (RefSeq) CHAF1A, CAF-1, CAF1, CAF1B, CAF1P150, P150; chromatin assembly factor 1 subunit A	--	[B]	Chromatin structure and dynamics	CAF1 complex subunit p150, region binding to CAF1-p60 at C-term	Chromatin assembly factor 1 subunit A OS=Homo sapiens OX=9606 GN=CHAF1A PE=1 SV=3	B	Chromatin structure and dynamics	chromatin assembly factor 1 subunit A [Homo sapiens]	cellular component: cell (GO:0005623);; cellular component: organelle (GO:0043226);; cellular component: organelle part (GO:0044422);; cellular component: cell part (GO:0044464);; cellular component: membrane-enclosed lumen (GO:0031974);; molecular function: binding (GO:0005488);; biological process: cellular process (GO:0009987);; biological process: cellular component organization or biogenesis…
ENSG00000164087	POC1A	5.005827	457	5.401488	378	4.453636	304	14.947889	1168	13.613596	971	20.366482	1494	1.61E-16	-1.786173201	down	--	--	Biological Process: reproduction (GO:0000003);; Biological Process: microtubule cytoskeleton organization (GO:0000226);; Biological Process: mitotic cell cycle (GO:0000278);; Cellular Component: spindle pole (GO:0000922);; Biological Process: skeletal system development (GO:0001501);; Biological Process: chondrocyte differentiation (GO:0002062);; Biological Process: chondrocyte development (GO:00…	K16482|3.2e-26|hsa:25886|K16482 centriolar protein POC1 | (RefSeq) POC1A, PIX2, SOFT, WDR51A; POC1 centriolar protein A	--	--	--	WD domain, G-beta repeat	POC1 centriolar protein homolog A OS=Homo sapiens OX=9606 GN=POC1A PE=1 SV=2	Z	Cytoskeleton	POC1 centriolar protein homolog A isoform 2 [Homo sapiens]	biological process: reproduction (GO:0000003);; biological process: cellular process (GO:0009987);; biological process: cellular component organization or biogenesis (GO:0071840);; biological process: single-organism process (GO:0044699);; cellular component: cell (GO:0005623);; cellular component: organelle (GO:0043226);; cellular component: organelle part (GO:0044422);; cellular component: cell…
ENSG00000168078	PBK	4.64985	427	5.317728	395	4.435001	323	16.674579	1387	17.726438	1345	11.421092	918	2.11E-20	-1.777648347	down	[M]	Cell wall/membrane/envelope biogenesis	Biological Process: mitotic cell cycle (GO:0000278);; Molecular Function: protein serine/threonine kinase activity (GO:0004674);; Molecular Function: ATP binding (GO:0005524);;	K08865|1.3e-185|hsa:55872|K08865 PDZ-binding kinase [EC:2.7.12.2] | (RefSeq) PBK, CT84, HEL164, Nori-3, SPK, TOPK; PDZ binding kinase	--	[T]	Signal transduction mechanisms	Protein kinase domain	Lymphokine-activated killer T-cell-originated protein kinase OS=Homo sapiens OX=9606 GN=PBK PE=1 SV=3	T	Signal transduction mechanisms	lymphokine-activated killer T-cell-originated protein kinase isoform 1 [Homo sapiens]	biological process: cellular process (GO:0009987);; biological process: single-organism process (GO:0044699);; biological process: metabolic process (GO:0008152);; molecular function: catalytic activity (GO:0003824);; molecular function: binding (GO:0005488)
ENSG00000116329	OPRD1	0.066826	29	0.011719	4	0.039734	13	0.213889	65	0.35899	71	0.168707	61	4.26E-05	-1.774167855	down	--	--	Cellular Component: integral component of membrane (GO:0016021);; Molecular Function: enkephalin receptor activity (GO:0038046);;	K04213|1.9e-204|hsa:4985|K04213 delta-type opioid receptor | (RefSeq) OPRD1, DOP, DOR, DOR1, OPRD; opioid receptor delta 1	cGMP-PKG signaling pathway (ko04022);; Sphingolipid signaling pathway (ko04071);; Neuroactive ligand-receptor interaction (ko04080)	[R]	General function prediction only	7 transmembrane receptor (rhodopsin family)	Delta-type opioid receptor OS=Homo sapiens OX=9606 GN=OPRD1 PE=1 SV=4	T	Signal transduction mechanisms	delta-type opioid receptor [Homo sapiens]	cellular component: membrane (GO:0016020);; cellular component: membrane part (GO:0044425);; biological process: cellular process (GO:0009987);; biological process: signaling (GO:0023052);; biological process: single-organism process (GO:0044699);; biological process: response to stimulus (GO:0050896);; biological process: biological regulation (GO:0065007);; molecular function: signal transducer…
ENSG00000151725	CENPU	10.381301	969	14.521713	1047	9.489859	628	51.062861	3874	47.779417	3457	21.006786	1599	3.91E-11	-1.773340238	down	--	--	Cellular Component: chromosome, centromeric region (GO:0000775);; Cellular Component: kinetochore (GO:0000776);; Cellular Component: condensed chromosome kinetochore (GO:0000777);; Cellular Component: condensed chromosome, centromeric region (GO:0000779);; Cellular Component: condensed chromosome (GO:0000793);; Cellular Component: cellular_component (GO:0005575);; Cellular Component: intracellula…	K11513|1.4e-222|hsa:79682|K11513 centromere protein U | (RefSeq) CENPU, CENP50, CENPU50, KLIP1, MLF1IP, PBIP1; centromere protein U	--	--	--	CENP-A nucleosome associated complex (NAC) subunit	Centromere protein U OS=Homo sapiens OX=9606 GN=CENPU PE=1 SV=1	K	Transcription	centromere protein U [Homo sapiens]	cellular component: cell (GO:0005623);; cellular component: organelle (GO:0043226);; cellular component: organelle part (GO:0044422);; cellular component: cell part (GO:0044464);; cellular component: macromolecular complex (GO:0032991);; biological process: cellular process (GO:0009987);; biological process: cellular component organization or biogenesis (GO:0071840);; biological process: multicel…
ENSG00000075702	WDR62	3.588522	801	4.346766	760	3.270036	558	11.868547	2295	11.463527	2000	12.634342	2287	5.68E-25	-1.76928419	down	--	--	Biological Process: microtubule cytoskeleton organization (GO:0000226);; Biological Process: mitotic cell cycle (GO:0000278);; Cellular Component: spindle pole (GO:0000922);; Molecular Function: molecular_function (GO:0003674);; Molecular Function: nucleic acid binding (GO:0003676);; Molecular Function: RNA binding (GO:0003723);; Molecular Function: binding (GO:0005488);; Molecular Function: prot…	K21762|3.5e-254|hsa:284403|K21762 WD repeat-containing protein 62 | (RefSeq) WDR62, C19orf14, MCPH2; WD repeat domain 62	--	[S]	Function unknown	WD domain, G-beta repeat	WD repeat-containing protein 62 OS=Homo sapiens OX=9606 GN=WDR62 PE=1 SV=4	S	Function unknown	hypothetical protein [Homo sapiens]	biological process: cellular process (GO:0009987);; biological process: cellular component organization or biogenesis (GO:0071840);; biological process: single-organism process (GO:0044699);; cellular component: cell (GO:0005623);; cellular component: organelle (GO:0043226);; cellular component: organelle part (GO:0044422);; cellular component: cell part (GO:0044464);; molecular function: binding…
ENSG00000115163	CENPA	3.77964	254	6.046034	308	3.795022	191	14.416608	847	13.645717	725	15.492368	841	1.40E-15	-1.763376449	down	--	--	Cellular Component: nucleosome (GO:0000786);; Molecular Function: DNA binding (GO:0003677);; Molecular Function: protein heterodimerization activity (GO:0046982);;	K11495|2.1e-66|hsa:1058|K11495 histone H3-like centromeric protein A | (RefSeq) CENPA, CENP-A, CenH3; centromere protein A	--	[B]	Chromatin structure and dynamics	Core histone H2A/H2B/H3/H4	Histone H3-like centromeric protein A OS=Homo sapiens OX=9606 GN=CENPA PE=1 SV=1	B	Chromatin structure and dynamics	histone H3-like centromeric protein A isoform a [Homo sapiens]	cellular component: cell (GO:0005623);; cellular component: macromolecular complex (GO:0032991);; cellular component: organelle (GO:0043226);; cellular component: organelle part (GO:0044422);; cellular component: cell part (GO:0044464);; molecular function: binding (GO:0005488)
ENSG00000160957	RECQL4	7.230225	1278	7.543946	1030	7.7063	976	23.371895	3558	22.241244	3053	23.890354	3420	3.53E-34	-1.760944461	down	[L]	Replication, recombination and repair	Molecular Function: nucleic acid binding (GO:0003676);; Molecular Function: helicase activity (GO:0004386);; Molecular Function: ATP binding (GO:0005524);; Biological Process: DNA recombination (GO:0006310);;	K10730|0.0e+00|hsa:9401|K10730 ATP-dependent DNA helicase Q4 [EC:3.6.4.12] | (RefSeq) RECQL4, RECQ4; RecQ like helicase 4	--	[L]	Replication, recombination and repair	Helicase conserved C-terminal domain	ATP-dependent DNA helicase Q4 OS=Homo sapiens OX=9606 GN=RECQL4 PE=1 SV=2	L	Replication, recombination and repair	ATP-dependent DNA helicase Q4 [Homo sapiens]	molecular function: binding (GO:0005488);; molecular function: catalytic activity (GO:0003824);; biological process: metabolic process (GO:0008152);; biological process: cellular process (GO:0009987)
Homo_sapiens_newGene_4869	--	0	0	0.122097	13	0.044985	5	0.406143	44	0.441107	48	0.403519	42	0.000370397	-1.759663193	down	--	--	--	--	--	--	--	--	--	--	--	--	--
ENSG00000147536	GINS4	1.800844	296	2.301934	277	1.443489	169	5.83031	759	5.703009	768	5.538448	779	4.62E-17	-1.753030332	down	--	--	Cellular Component: nucleus (GO:0005634);; Biological Process: DNA-dependent DNA replication (GO:0006261);;	K10735|2.7e-101|hsa:84296|K10735 GINS complex subunit 4 | (RefSeq) GINS4, SLD5; GINS complex subunit 4	--	[L]	Replication, recombination and repair	GINS complex protein	DNA replication complex GINS protein SLD5 OS=Homo sapiens OX=9606 GN=GINS4 PE=1 SV=1	L	Replication, recombination and repair	DNA replication complex GINS protein SLD5 [Homo sapiens]	cellular component: cell (GO:0005623);; cellular component: organelle (GO:0043226);; cellular component: cell part (GO:0044464);; biological process: metabolic process (GO:0008152);; biological process: cellular process (GO:0009987)
ENSG00000170779	CDCA4	4.820374	566	6.723151	614	5.055616	445	15.941147	1618	17.55612	1631	18.645046	1796	4.99E-20	-1.749141173	down	--	--	Cellular Component: nucleoplasm (GO:0005654);; Cellular Component: cytosol (GO:0005829);; Cellular Component: plasma membrane (GO:0005886);; Biological Process: cell division (GO:0051301);;	--	--	--	--	SERTA motif	Cell division cycle-associated protein 4 OS=Homo sapiens OX=9606 GN=CDCA4 PE=1 SV=1	S	Function unknown	cell division cycle-associated protein 4 [Homo sapiens]	cellular component: cell (GO:0005623);; cellular component: organelle (GO:0043226);; cellular component: organelle part (GO:0044422);; cellular component: cell part (GO:0044464);; cellular component: membrane (GO:0016020);; biological process: cellular process (GO:0009987);; biological process: single-organism process (GO:0044699)
ENSG00000176619	LMNB2	17.980423	3921	17.167652	2930	17.552334	2868	51.426514	9794	50.102264	8650	61.318684	10975	5.03E-27	-1.747773086	down	--	--	Cellular Component: intermediate filament (GO:0005882);;	K07611|1.0e-242|hsa:84823|K07611 lamin B | (RefSeq) LMNB2, EPM9, LAMB2, LMN2; lamin B2	Apoptosis (ko04210)	[DY]	Cell cycle control, cell division, chromosome partitioning;; Nuclear structure	Intermediate filament protein	Lamin-B2 OS=Homo sapiens OX=9606 GN=LMNB2 PE=1 SV=4	--	--	lamin-B2 [Homo sapiens]	cellular component: cell (GO:0005623);; cellular component: organelle (GO:0043226);; cellular component: organelle part (GO:0044422);; cellular component: cell part (GO:0044464);; cellular component: supramolecular complex (GO:0099080)
ENSG00000062822	POLD1	5.50392	874	5.676799	683	5.787329	700	16.021082	2236	18.138434	2242	17.897723	2350	1.12E-29	-1.743855892	down	[L]	Replication, recombination and repair	Molecular Function: nucleotide binding (GO:0000166);; Molecular Function: DNA binding (GO:0003677);; Molecular Function: DNA-directed DNA polymerase activity (GO:0003887);; Cellular Component: nucleoplasm (GO:0005654);; Cellular Component: cytosol (GO:0005829);; Biological Process: base-excision repair, gap-filling (GO:0006287);; Molecular Function: 3'-5' exonuclease activity (GO:0008408);; Cellu…	K02327|0.0e+00|hsa:5424|K02327 DNA polymerase delta subunit 1 [EC:2.7.7.7] | (RefSeq) POLD1, CDC2, CRCS10, MDPL, POLD; DNA polymerase delta 1, catalytic subunit	DNA replication (ko03030);; Base excision repair (ko03410);; Nucleotide excision repair (ko03420);; Mismatch repair (ko03430);; Homologous recombination (ko03440)	[L]	Replication, recombination and repair	DNA polymerase family B	DNA polymerase delta catalytic subunit OS=Homo sapiens OX=9606 GN=POLD1 PE=1 SV=2	L	Replication, recombination and repair	DNA polymerase delta catalytic subunit isoform 2 [Homo sapiens]	molecular function: binding (GO:0005488);; biological process: metabolic process (GO:0008152);; biological process: cellular process (GO:0009987);; molecular function: catalytic activity (GO:0003824);; cellular component: cell (GO:0005623);; cellular component: organelle (GO:0043226);; cellular component: organelle part (GO:0044422);; cellular component: cell part (GO:0044464);; cellular componen…
ENSG00000111445	RFC5	6.784796	670	7.263021	530	6.43589	438	20.839706	1664	21.974631	1728	20.434936	1544	6.70E-29	-1.743760235	down	[L]	Replication, recombination and repair	Molecular Function: DNA binding (GO:0003677);; Molecular Function: ATP binding (GO:0005524);; Biological Process: DNA replication (GO:0006260);;	K10756|1.3e-177|hsa:5985|K10756 replication factor C subunit 3/5 | (RefSeq) RFC5, RFC36; replication factor C subunit 5	DNA replication (ko03030);; Nucleotide excision repair (ko03420);; Mismatch repair (ko03430)	[L]	Replication, recombination and repair	Replication factor C C-terminal domain	Replication factor C subunit 5 OS=Homo sapiens OX=9606 GN=RFC5 PE=1 SV=1	L	Replication, recombination and repair	replication factor C subunit 5 isoform 2 [Homo sapiens]	molecular function: binding (GO:0005488);; biological process: metabolic process (GO:0008152);; biological process: cellular process (GO:0009987)
ENSG00000168496	FEN1	18.565058	1977	21.180684	1765	16.203789	1302	55.650247	5189	56.932901	4817	59.171866	5191	6.98E-28	-1.739448272	down	[L]	Replication, recombination and repair	Molecular Function: magnesium ion binding (GO:0000287);; Molecular Function: DNA binding (GO:0003677);; Cellular Component: nucleoplasm (GO:0005654);; Cellular Component: nucleolus (GO:0005730);; Cellular Component: mitochondrion (GO:0005739);; Biological Process: DNA replication (GO:0006260);; Biological Process: base-excision repair (GO:0006284);; Biological Process: memory (GO:0007613);; Molec…	K04799|6.0e-209|ggo:101134523|K04799 flap endonuclease-1 [EC:3.-.-.-] | (RefSeq) FEN1; flap endonuclease 1	DNA replication (ko03030);; Base excision repair (ko03410);; Non-homologous end-joining (ko03450)	[L]	Replication, recombination and repair	XPG N-terminal domain	Flap endonuclease 1 OS=Homo sapiens OX=9606 GN=FEN1 PE=1 SV=1	L	Replication, recombination and repair	flap endonuclease 1 [Homo sapiens]	molecular function: binding (GO:0005488);; cellular component: cell (GO:0005623);; cellular component: organelle (GO:0043226);; cellular component: organelle part (GO:0044422);; cellular component: cell part (GO:0044464);; biological process: metabolic process (GO:0008152);; biological process: cellular process (GO:0009987);; biological process: response to stimulus (GO:0050896);; biological proc…
ENSG00000123374	CDK2	9.444443	1018	8.212275	689	8.194031	663	26.367218	2385	27.869561	2315	27.365444	2367	5.83E-30	-1.737918569	down	--	--	Molecular Function: protein serine/threonine kinase activity (GO:0004674);; Molecular Function: ATP binding (GO:0005524);; Cellular Component: nucleoplasm (GO:0005654);; Cellular Component: centrosome (GO:0005813);;	K02206|4.3e-14|cjc:100398703|K02206 cyclin-dependent kinase 2 [EC:2.7.11.22] | (RefSeq) CDK2; cyclin dependent kinase 2	FoxO signaling pathway (ko04068);; Cell cycle (ko04110);; Oocyte meiosis (ko04114);; p53 signaling pathway (ko04115);; PI3K-Akt signaling pathway (ko04151);; Cellular senescence (ko04218);; Progesterone-mediated oocyte maturation (ko04914);; Cushing syndrome (ko04934);; Hepatitis C (ko05160);; Hepatitis B (ko05161);; Measles (ko05162);; Human papillomavirus infection (ko05165);; Human T-cell leuk…	[R]	General function prediction only	Protein kinase domain	Cyclin-dependent kinase 2 OS=Homo sapiens OX=9606 GN=CDK2 PE=1 SV=2	D	Cell cycle control, cell division, chromosome partitioning	cyclin-dependent kinase 2 isoform X4 [Carlito syrichta]	biological process: metabolic process (GO:0008152);; biological process: cellular process (GO:0009987);; molecular function: catalytic activity (GO:0003824);; molecular function: binding (GO:0005488);; cellular component: cell (GO:0005623);; cellular component: organelle (GO:0043226);; cellular component: organelle part (GO:0044422);; cellular component: cell part (GO:0044464)
ENSG00000112984	KIF20A	5.090274	756	6.711032	779	5.448799	603	17.837643	2318	18.776142	2207	16.29363	1982	1.20E-25	-1.731547226	down	--	--	Biological Process: mitotic cytokinesis (GO:0000281);; Molecular Function: microtubule motor activity (GO:0003777);; Molecular Function: ATP binding (GO:0005524);; Cellular Component: nucleoplasm (GO:0005654);; Cellular Component: Golgi apparatus (GO:0005794);; Cellular Component: microtubule (GO:0005874);; Biological Process: microtubule-based movement (GO:0007018);; Molecular Function: microtub…	K10402|0.0e+00|hsa:10112|K10402 kinesin family member 20 | (RefSeq) KIF20A, MKLP2, RAB6KIFL; kinesin family member 20A	--	[Z]	Cytoskeleton	Kinesin motor domain	Kinesin-like protein KIF20A OS=Homo sapiens OX=9606 GN=KIF20A PE=1 SV=1	Z	Cytoskeleton	kinesin-like protein KIF20A [Homo sapiens]	biological process: cellular process (GO:0009987);; biological process: single-organism process (GO:0044699);; molecular function: catalytic activity (GO:0003824);; molecular function: binding (GO:0005488);; cellular component: cell (GO:0005623);; cellular component: organelle (GO:0043226);; cellular component: organelle part (GO:0044422);; cellular component: cell part (GO:0044464);; cellular co…
ENSG00000111247	RAD51AP1	1.351785	123	2.70394	193	1.142879	83	6.567305	530	6.325111	464	4.445237	332	6.11E-09	-1.713676466	down	--	--	Biological Process: regulation of DNA recombination (GO:0000018);; Cellular Component: nuclear chromosome (GO:0000228);; Biological Process: double-strand break repair via homologous recombination (GO:0000724);; Biological Process: recombinational repair (GO:0000725);; Cellular Component: chromatin (GO:0000785);; Cellular Component: nuclear chromatin (GO:0000790);; Molecular Function: molecular_f…	K20778|1.8e-31|hsa:10635|K20778 RAD51-associated protein 1 | (RefSeq) RAD51AP1, PIR51; RAD51 associated protein 1	--	--	--	--	RAD51-associated protein 1 OS=Homo sapiens OX=9606 GN=RAD51AP1 PE=1 SV=1	L	Replication, recombination and repair	RAD51-associated protein 1 isoform X1 [Pongo abelii]	biological process: biological regulation (GO:0065007);; cellular component: cell (GO:0005623);; cellular component: organelle (GO:0043226);; cellular component: organelle part (GO:0044422);; cellular component: cell part (GO:0044464);; biological process: metabolic process (GO:0008152);; biological process: cellular process (GO:0009987);; biological process: response to stimulus (GO:0050896);; c…
ENSG00000123219	CENPK	1.493508	111	1.512661	90	0.875634	50	4.085736	284	5.11676	299	3.384389	208	3.44E-10	-1.712973707	down	--	--	Cellular Component: nucleus (GO:0005634);; Biological Process: kinetochore assembly (GO:0051382);;	K11503|1.6e-147|hsa:64105|K11503 centromere protein K | (RefSeq) CENPK, AF5alpha, CENP-K, FKSG14, P33, Solt; centromere protein K	--	--	--	Centromere-associated protein K	Centromere protein K OS=Homo sapiens OX=9606 GN=CENPK PE=1 SV=1	S	Function unknown	centromere protein K isoform 1 [Homo sapiens]	cellular component: cell (GO:0005623);; cellular component: organelle (GO:0043226);; cellular component: cell part (GO:0044464);; biological process: cellular process (GO:0009987);; biological process: cellular component organization or biogenesis (GO:0071840)
ENSG00000181192	DHTKD1	14.013038	3368	14.478035	2722	13.648761	2461	43.580912	9161	43.892107	8368	38.155571	7541	7.67E-41	-1.709100757	down	[C]	Energy production and conversion	Molecular Function: oxoglutarate dehydrogenase (succinyl-transferring) activity (GO:0004591);; Cellular Component: mitochondrion (GO:0005739);; Biological Process: tricarboxylic acid cycle (GO:0006099);; Molecular Function: thiamine pyrophosphate binding (GO:0030976);;	K15791|0.0e+00|hsa:55526|K15791 probable 2-oxoglutarate dehydrogenase E1 component DHKTD1 [EC:1.2.4.2] | (RefSeq) DHTKD1, AMOXAD, CMT2Q; dehydrogenase E1 and transketolase domain containing 1	Lysine degradation (ko00310);; Tryptophan metabolism (ko00380)	[G]	Carbohydrate transport and metabolism	Transketolase, pyrimidine binding domain	Probable 2-oxoglutarate dehydrogenase E1 component DHKTD1, mitochondrial OS=Homo sapiens OX=9606 GN=DHTKD1 PE=1 SV=2	C	Energy production and conversion	probable 2-oxoglutarate dehydrogenase E1 component DHKTD1, mitochondrial [Homo sapiens]	biological process: metabolic process (GO:0008152);; biological process: single-organism process (GO:0044699);; molecular function: catalytic activity (GO:0003824);; cellular component: cell (GO:0005623);; cellular component: organelle (GO:0043226);; cellular component: cell part (GO:0044464);; biological process: cellular process (GO:0009987);; molecular function: binding (GO:0005488)
ENSG00000119969	HELLS	1.479739	220	1.493244	193	1.459341	145	6.285955	850	5.271075	687	2.287467	297	6.53E-09	-1.707045374	down	[S]	Function unknown	Cellular Component: chromosome, centromeric region (GO:0000775);; Cellular Component: chromatin (GO:0000785);; Cellular Component: heterochromatin (GO:0000792);; Biological Process: urogenital system development (GO:0001655);; Biological Process: cell activation (GO:0001775);; Biological Process: immune system process (GO:0002376);; Biological Process: immune system development (GO:0002520);; Bio…	K19001|3.2e-152|hsa:3070|K19001 ATP-dependent DNA helicase | (RefSeq) HELLS, ICF4, LSH, Nbla10143, PASG, SMARCA6; helicase, lymphoid specific	--	[K]	Transcription	Helicase conserved C-terminal domain	Lymphoid-specific helicase OS=Homo sapiens OX=9606 GN=HELLS PE=1 SV=1	K	Transcription	helicase, lymphoid-specific, isoform CRA_g [Homo sapiens]	cellular component: cell (GO:0005623);; cellular component: organelle (GO:0043226);; cellular component: organelle part (GO:0044422);; cellular component: cell part (GO:0044464);; biological process: multicellular organismal process (GO:0032501);; biological process: developmental process (GO:0032502);; biological process: single-organism process (GO:0044699);; biological process: cellular proces…
ENSG00000162063	CCNF	3.854328	771	5.256105	819	3.17794	476	11.521608	1990	12.143147	1899	14.412977	2357	3.45E-15	-1.705197875	down	--	--	Cellular Component: host cell nucleus (GO:0042025);; Biological Process: regulation of cell cycle (GO:0051726);;	K10289|0.0e+00|hsa:899|K10289 F-box protein 1 (cyclin F) | (RefSeq) CCNF, FBX1, FBXO1; cyclin F	--	[D]	Cell cycle control, cell division, chromosome partitioning	Cyclin, N-terminal domain	Cyclin-F OS=Homo sapiens OX=9606 GN=CCNF PE=1 SV=2	D	Cell cycle control, cell division, chromosome partitioning	cyclin-F isoform 1 [Homo sapiens]	cellular component: other organism (GO:0044215);; cellular component: other organism part (GO:0044217);; biological process: biological regulation (GO:0065007)
ENSG00000138092	CENPO	3.701911	750	4.653443	738	3.626146	550	12.180855	2099	11.617749	1818	12.654824	2075	1.56E-22	-1.687643947	down	--	--	Cellular Component: chromosome, centromeric region (GO:0000775);; Cellular Component: kinetochore (GO:0000776);; Cellular Component: condensed chromosome kinetochore (GO:0000777);; Cellular Component: condensed chromosome, centromeric region (GO:0000779);; Cellular Component: condensed chromosome (GO:0000793);; Cellular Component: cellular_component (GO:0005575);; Cellular Component: intracellula…	K11507|2.0e-167|hsa:79172|K11507 centromere protein O | (RefSeq) CENPO, CENP-O, ICEN-36, MCM21R; centromere protein O	--	--	--	Cenp-O kinetochore centromere component	Centromere protein O OS=Homo sapiens OX=9606 GN=CENPO PE=1 SV=1	S	Function unknown	centromere protein O isoform 1 [Homo sapiens]	cellular component: cell (GO:0005623);; cellular component: organelle (GO:0043226);; cellular component: organelle part (GO:0044422);; cellular component: cell part (GO:0044464);; cellular component: macromolecular complex (GO:0032991);; biological process: cellular process (GO:0009987);; biological process: cellular component organization or biogenesis (GO:0071840);; cellular component: membrane…
ENSG00000203760	CENPW	6.957559	194	5.899715	137	4.278797	108	15.79834	455	13.680244	354	21.501188	485	3.88E-13	-1.672190981	down	--	--	Biological Process: mitotic cell cycle (GO:0000278);; Molecular Function: DNA binding (GO:0003677);; Molecular Function: protein heterodimerization activity (GO:0046982);; Biological Process: kinetochore assembly (GO:0051382);;	--	--	--	--	CENP-W protein	Centromere protein W OS=Homo sapiens OX=9606 GN=CENPW PE=1 SV=1	S	Function unknown	centromere protein W isoform b [Homo sapiens]	biological process: cellular process (GO:0009987);; biological process: single-organism process (GO:0044699);; molecular function: binding (GO:0005488);; biological process: cellular component organization or biogenesis (GO:0071840)
ENSG00000079616	KIF22	25.55235	2394	27.236244	2047	23.945995	1683	65.529366	5426	70.025856	5294	88.329879	6967	2.16E-19	-1.669776869	down	--	--	Molecular Function: DNA binding (GO:0003677);; Molecular Function: microtubule motor activity (GO:0003777);; Molecular Function: ATP binding (GO:0005524);; Cellular Component: cytosol (GO:0005829);; Cellular Component: microtubule (GO:0005874);; Biological Process: DNA repair (GO:0006281);; Biological Process: microtubule-based movement (GO:0007018);; Molecular Function: microtubule binding (GO:0…	K10403|0.0e+00|hsa:3835|K10403 kinesin family member 22 | (RefSeq) KIF22, A-328A3.2, KID, KNSL4, OBP, OBP-1, OBP-2, SEMDJL2; kinesin family member 22	Progesterone-mediated oocyte maturation (ko04914)	[Z]	Cytoskeleton	Kinesin motor domain	Kinesin-like protein KIF22 OS=Homo sapiens OX=9606 GN=KIF22 PE=1 SV=5	Z	Cytoskeleton	kinesin-like protein KIF22 isoform 1 [Homo sapiens]	molecular function: binding (GO:0005488);; molecular function: catalytic activity (GO:0003824);; cellular component: cell (GO:0005623);; cellular component: cell part (GO:0044464);; cellular component: organelle (GO:0043226);; cellular component: organelle part (GO:0044422);; cellular component: supramolecular complex (GO:0099080);; biological process: metabolic process (GO:0008152);; biological …
ENSG00000126246	IGFLR1	0.819091	60	1.180869	71	0.6962	37	3.299754	165	2.718218	166	3.448642	200	3.05E-08	-1.669368798	down	--	--	Cellular Component: cellular_component (GO:0005575);; Cellular Component: cell (GO:0005623);; Cellular Component: plasma membrane (GO:0005886);; Cellular Component: membrane (GO:0016020);; Cellular Component: cell part (GO:0044464);; Cellular Component: cell periphery (GO:0071944);;	--	--	--	--	--	IGF-like family receptor 1 OS=Homo sapiens OX=9606 GN=IGFLR1 PE=1 SV=1	T	Signal transduction mechanisms	IGF-like family receptor 1 isoform a precursor [Homo sapiens]	cellular component: cell (GO:0005623);; cellular component: membrane (GO:0016020);; cellular component: cell part (GO:0044464)
ENSG00000214357	NEURL1B	2.393029	690	3.570708	697	2.497705	551	7.827068	1937	7.611941	1728	8.25801	1972	6.96E-22	-1.668333844	down	--	--	Molecular Function: molecular_function (GO:0003674);; Molecular Function: catalytic activity (GO:0003824);; Cellular Component: cellular_component (GO:0005575);; Cellular Component: intracellular (GO:0005622);; Cellular Component: cell (GO:0005623);; Cellular Component: cytoplasm (GO:0005737);; Cellular Component: endosome (GO:0005768);; Cellular Component: early endosome (GO:0005769);; Biologica…	K01931|0.0e+00|hsa:54492|K01931 protein neuralized [EC:2.3.2.27] | (RefSeq) NEURL1B, NEURL3, RNF67B, hNeur2, neur2; neuralized E3 ubiquitin protein ligase 1B	--	[T]	Signal transduction mechanisms	Neuralized	E3 ubiquitin-protein ligase NEURL1B OS=Homo sapiens OX=9606 GN=NEURL1B PE=1 SV=1	O	Posttranslational modification, protein turnover, chaperones	E3 ubiquitin-protein ligase NEURL1B isoform hNEUR2 [Homo sapiens]	molecular function: catalytic activity (GO:0003824);; cellular component: cell (GO:0005623);; cellular component: cell part (GO:0044464);; cellular component: organelle (GO:0043226);; biological process: localization (GO:0051179);; biological process: single-organism process (GO:0044699)
ENSG00000112309	B3GAT2	0.134092	42	0.162095	39	0.085743	20	0.715391	192	0.498694	122	0.211218	54	2.02E-05	-1.662899211	down	--	--	Cellular Component: Golgi membrane (GO:0000139);; Biological Process: protein glycosylation (GO:0006486);; Molecular Function: galactosylgalactosylxylosylprotein 3-beta-glucuronosyltransferase activity (GO:0015018);; Cellular Component: integral component of membrane (GO:0016021);; Molecular Function: metal ion binding (GO:0046872);;	K10157|4.5e-181|hsa:135152|K10157 galactosylgalactosylxylosylprotein 3-beta-glucuronosyltransferase 2 [EC:2.4.1.135] | (RefSeq) B3GAT2, GLCATS; beta-1,3-glucuronyltransferase 2	Mannose type O-glycan biosynthesis (ko00515)	[O]	Posttranslational modification, protein turnover, chaperones	Glycosyltransferase family 43	Galactosylgalactosylxylosylprotein 3-beta-glucuronosyltransferase 2 OS=Homo sapiens OX=9606 GN=B3GAT2 PE=1 SV=2	G	Carbohydrate transport and metabolism	galactosylgalactosylxylosylprotein 3-beta-glucuronosyltransferase 2 [Pan troglodytes]	cellular component: cell (GO:0005623);; cellular component: membrane (GO:0016020);; cellular component: organelle (GO:0043226);; cellular component: organelle part (GO:0044422);; cellular component: cell part (GO:0044464);; biological process: metabolic process (GO:0008152);; biological process: cellular process (GO:0009987);; biological process: single-organism process (GO:0044699);; molecular f…
ENSG00000088325	TPX2	22.199572	3624	28.610266	3655	21.150866	2587	75.165672	10717	72.332898	9350	62.988873	8440	3.44E-24	-1.662165903	down	--	--	Cellular Component: nucleoplasm (GO:0005654);; Cellular Component: microtubule (GO:0005874);; Molecular Function: protein kinase binding (GO:0019901);; Biological Process: activation of protein kinase activity (GO:0032147);; Cellular Component: axon hillock (GO:0043203);; Cellular Component: intercellular bridge (GO:0045171);; Biological Process: regulation of mitotic spindle organization (GO:006…	K16812|0.0e+00|hsa:22974|K16812 targeting protein for Xklp2 | (RefSeq) TPX2, C20orf1, C20orf2, DIL-2, DIL2, FLS353, GD:C20orf1, HCA519, HCTP4, REPP86, p100; TPX2 microtubule nucleation factor	--	--	--	Cell cycle regulated microtubule associated protein	Targeting protein for Xklp2 OS=Homo sapiens OX=9606 GN=TPX2 PE=1 SV=2	Z	Cytoskeleton	hepatocellular carcinoma-associated antigen 90 [Homo sapiens]	cellular component: cell (GO:0005623);; cellular component: organelle (GO:0043226);; cellular component: organelle part (GO:0044422);; cellular component: cell part (GO:0044464);; cellular component: supramolecular complex (GO:0099080);; molecular function: binding (GO:0005488);; biological process: biological regulation (GO:0065007);; cellular component: extracellular region (GO:0005576);; cellu…
ENSG00000010292	NCAPD2	7.391722	1905	10.095671	2043	7.953309	1541	24.417543	5523	24.481234	5020	24.902191	5294	6.39E-23	-1.655756965	down	--	--	Cellular Component: nucleus (GO:0005634);; Biological Process: mitotic chromosome condensation (GO:0007076);; Biological Process: cell division (GO:0051301);;	K06677|0.0e+00|hsa:9918|K06677 condensin complex subunit 1 | (RefSeq) NCAPD2, CAP-D2, CNAP1, MCPH21, hCAP-D2; non-SMC condensin I complex subunit D2	--	[BD]	Chromatin structure and dynamics;; Cell cycle control, cell division, chromosome partitioning	non-SMC mitotic condensation complex subunit 1	Condensin complex subunit 1 OS=Homo sapiens OX=9606 GN=NCAPD2 PE=1 SV=3	--	--	condensin complex subunit 1 [Homo sapiens]	cellular component: cell (GO:0005623);; cellular component: organelle (GO:0043226);; cellular component: cell part (GO:0044464);; biological process: cellular process (GO:0009987);; biological process: single-organism process (GO:0044699);; biological process: cellular component organization or biogenesis (GO:0071840)
ENSG00000188610	FAM72B	0.53371	60	0.660324	57	0.476998	40	2.05082	188	1.748082	155	1.507802	139	1.87E-09	-1.654322541	down	--	--	Cellular Component: cellular_component (GO:0005575);; Cellular Component: intracellular (GO:0005622);; Cellular Component: cell (GO:0005623);; Cellular Component: cytoplasm (GO:0005737);; Cellular Component: cytosol (GO:0005829);; Cellular Component: organelle (GO:0043226);; Cellular Component: membrane-bounded organelle (GO:0043227);; Cellular Component: intracellular organelle (GO:0043229);; Ce…	--	--	--	--	FAM72 protein	Protein FAM72B OS=Homo sapiens OX=9606 GN=FAM72B PE=1 SV=2	S	Function unknown	protein FAM72B isoform 1 [Homo sapiens]	cellular component: cell (GO:0005623);; cellular component: cell part (GO:0044464);; cellular component: organelle (GO:0043226)
ENSG00000120802	TMPO	26.282515	4704	30.6509	4261	23.942844	3207	77.672125	12376	85.275102	12309	67.218224	9938	1.20E-26	-1.652774854	down	--	--	Molecular Function: DNA binding (GO:0003677);; Cellular Component: integral component of membrane (GO:0016021);; Cellular Component: nuclear membrane (GO:0031965);;	K24031|4.1e-249|hsa:7112|K24031 lamina-associated polypeptide 2 | (RefSeq) TMPO, CMD1T, LAP2, LEMD4, PRO0868, TP; thymopoietin	--	--	--	Thymopoietin protein	Lamina-associated polypeptide 2, isoforms beta/gamma OS=Homo sapiens OX=9606 GN=TMPO PE=1 SV=2	S	Function unknown	thymopoietin isoform beta [Homo sapiens]	molecular function: binding (GO:0005488);; cellular component: membrane (GO:0016020);; cellular component: membrane part (GO:0044425);; cellular component: cell (GO:0005623);; cellular component: organelle (GO:0043226);; cellular component: organelle part (GO:0044422);; cellular component: cell part (GO:0044464)
ENSG00000284681	AC007240.1	0.388284	37	0.599796	39	0.632726	42	2.029054	151	1.294667	96	1.830538	135	2.27E-07	-1.647711969	down	[F]	Nucleotide transport and metabolism	Molecular Function: ribonucleoside-diphosphate reductase activity, thioredoxin disulfide as acceptor (GO:0004748);; Cellular Component: cytosol (GO:0005829);; Biological Process: deoxyribonucleotide biosynthetic process (GO:0009263);;	K10808|9.1e-194|hsa:6241|K10808 ribonucleoside-diphosphate reductase subunit M2 [EC:1.17.4.1] | (RefSeq) RRM2, C2orf48, R2, RR2, RR2M; ribonucleotide reductase regulatory subunit M2	Purine metabolism (ko00230);; Pyrimidine metabolism (ko00240);; Glutathione metabolism (ko00480);; Drug metabolism - other enzymes (ko00983);; p53 signaling pathway (ko04115)	[F]	Nucleotide transport and metabolism	Ribonucleotide reductase, small chain	Ribonucleoside-diphosphate reductase subunit M2 OS=Homo sapiens OX=9606 GN=RRM2 PE=1 SV=1	F	Nucleotide transport and metabolism	ribonucleoside-diphosphate reductase subunit M2 isoform X2 [Aotus nancymaae]	biological process: metabolic process (GO:0008152);; biological process: single-organism process (GO:0044699);; molecular function: catalytic activity (GO:0003824);; cellular component: cell (GO:0005623);; cellular component: cell part (GO:0044464);; biological process: cellular process (GO:0009987)
ENSG00000123416	TUBA1B	329.187471	24983	300.01064	17838	331.801711	18892	882.223223	58531	864.556912	51978	1004.677236	62621	1.16E-26	-1.643749053	down	--	--	--	--	--	--	--	--	--	--	--	TUBA1B isoform 2, partial [Pan troglodytes]	--
ENSG00000138031	ADCY3	0.510853	120	0.387069	72	0.670719	118	1.465063	290	2.085298	340	1.524479	295	2.30E-10	-1.637615646	down	[T]	Signal transduction mechanisms	Molecular Function: adenylate cyclase activity (GO:0004016);; Molecular Function: ATP binding (GO:0005524);; Cellular Component: plasma membrane (GO:0005886);; Cellular Component: cilium (GO:0005929);; Biological Process: cAMP biosynthetic process (GO:0006171);; Biological Process: adenylate cyclase-activating G-protein coupled receptor signaling pathway (GO:0007189);; Biological Process: acrosom…	K08043|0.0e+00|hsa:109|K08043 adenylate cyclase 3 [EC:4.6.1.1] | (RefSeq) ADCY3, AC-III, AC3, BMIQ19; adenylate cyclase 3	Purine metabolism (ko00230);; Endocrine resistance (ko01522);; Rap1 signaling pathway (ko04015);; Calcium signaling pathway (ko04020);; cGMP-PKG signaling pathway (ko04022);; cAMP signaling pathway (ko04024);; Chemokine signaling pathway (ko04062);; Phospholipase D signaling pathway (ko04072);; Oocyte meiosis (ko04114);; Longevity regulating pathway (ko04211);; Longevity regulating pathway - mult…	[C]	Energy production and conversion	Adenylate and Guanylate cyclase catalytic domain	Adenylate cyclase type 3 OS=Homo sapiens OX=9606 GN=ADCY3 PE=1 SV=3	C	Energy production and conversion	adenylate cyclase type 3 isoform 2 [Homo sapiens]	molecular function: catalytic activity (GO:0003824);; molecular function: binding (GO:0005488);; cellular component: cell (GO:0005623);; cellular component: membrane (GO:0016020);; cellular component: cell part (GO:0044464);; cellular component: organelle (GO:0043226);; biological process: metabolic process (GO:0008152);; biological process: cellular process (GO:0009987);; biological process: sin…
ENSG00000154920	EME1	9.459833	1015	13.184809	1078	8.859788	678	30.71693	2762	31.092137	2605	29.176434	2539	1.36E-18	-1.637023876	down	--	--	Molecular Function: DNA binding (GO:0003677);; Molecular Function: nuclease activity (GO:0004518);; Cellular Component: nucleus (GO:0005634);; Biological Process: DNA repair (GO:0006281);; Cellular Component: Holliday junction resolvase complex (GO:0048476);;	K10882|0.0e+00|hsa:146956|K10882 crossover junction endonuclease EME1 [EC:3.1.22.-] | (RefSeq) EME1, MMS4L, SLX2A; essential meiotic structure-specific endonuclease 1	Homologous recombination (ko03440);; Fanconi anemia pathway (ko03460)	--	--	ERCC4 domain	Crossover junction endonuclease EME1 OS=Homo sapiens OX=9606 GN=EME1 PE=1 SV=2	L	Replication, recombination and repair	crossover junction endonuclease EME1 isoform 1 [Homo sapiens]	molecular function: binding (GO:0005488);; molecular function: catalytic activity (GO:0003824);; cellular component: cell (GO:0005623);; cellular component: organelle (GO:0043226);; cellular component: cell part (GO:0044464);; biological process: metabolic process (GO:0008152);; biological process: cellular process (GO:0009987);; biological process: response to stimulus (GO:0050896);; cellular co…
ENSG00000123975	CKS2	22.837238	654	18.759531	421	26.141399	561	63.1646	1579	59.625099	1351	73.770432	1733	1.76E-16	-1.634064242	down	--	--	Biological Process: regulation of transcription, DNA-templated (GO:0006355);; Biological Process: cell proliferation (GO:0008283);; Molecular Function: kinase activity (GO:0016301);; Molecular Function: cyclin-dependent protein serine/threonine kinase regulator activity (GO:0016538);; Biological Process: mitotic cell cycle phase transition (GO:0044772);; Biological Process: cell division (GO:0051…	K02219|1.3e-41|bbub:102410373|K02219 cyclin-dependent kinase regulatory subunit CKS1 | (RefSeq) cyclin-dependent kinases regulatory subunit 2	Pathways in cancer (ko05200);; Small cell lung cancer (ko05222)	[D]	Cell cycle control, cell division, chromosome partitioning	Cyclin-dependent kinase regulatory subunit	Cyclin-dependent kinases regulatory subunit 2 OS=Homo sapiens OX=9606 GN=CKS2 PE=1 SV=1	D	Cell cycle control, cell division, chromosome partitioning	cyclin-dependent kinases regulatory subunit 2 [Nomascus leucogenys]	biological process: biological regulation (GO:0065007);; biological process: single-organism process (GO:0044699);; molecular function: catalytic activity (GO:0003824);; molecular function: molecular function regulator (GO:0098772);; biological process: cellular process (GO:0009987)
ENSG00000108106	UBE2S	15.493036	1832	15.540788	1435	15.919173	1410	40.008606	4084	39.336201	3671	57.059178	5511	4.98E-16	-1.632937136	down	--	--	Molecular Function: ATP binding (GO:0005524);; Molecular Function: transferase activity (GO:0016740);;	K10583|1.4e-117|hsa:27338|K10583 ubiquitin-conjugating enzyme E2 S [EC:2.3.2.23] | (RefSeq) UBE2S, E2-EPF, E2EPF, EPF5; ubiquitin conjugating enzyme E2 S	Ubiquitin mediated proteolysis (ko04120)	[O]	Posttranslational modification, protein turnover, chaperones	Ubiquitin-conjugating enzyme	Ubiquitin-conjugating enzyme E2 S OS=Homo sapiens OX=9606 GN=UBE2S PE=1 SV=2	O	Posttranslational modification, protein turnover, chaperones	ubiquitin-conjugating enzyme E2 S [Homo sapiens]	molecular function: binding (GO:0005488);; molecular function: catalytic activity (GO:0003824)
Homo_sapiens_newGene_2513	--	0.202258	27	0.54779	40	0.309227	25	1.248686	115	0.852762	68	1.373852	130	8.31E-06	-1.632189009	down	--	--	--	--	--	--	--	--	--	--	--	--	--
ENSG00000126453	BCL2L12	8.912188	537	9.17837	414	9.981322	407	24.763586	1280	22.481787	1116	27.703377	1413	7.15E-20	-1.62758438	down	--	--	Biological Process: regulation of apoptotic process (GO:0042981);;	--	--	--	--	--	Bcl-2-like protein 12 OS=Homo sapiens OX=9606 GN=BCL2L12 PE=1 SV=1	K	Transcription	RecName: Full=Bcl-2-like protein 12; Short=Bcl2-L-12; AltName: Full=Bcl-2-related proline-rich protein [Homo sapiens]	biological process: biological regulation (GO:0065007)
ENSG00000100526	CDKN3	9.379687	400	10.39325	342	9.216929	282	23.856088	878	32.775132	1085	26.9344	913	2.89E-18	-1.624489931	down	--	--	Molecular Function: protein tyrosine phosphatase activity (GO:0004725);; Cellular Component: cytosol (GO:0005829);;	K14167|4.2e-78|hsa:1033|K14167 cyclin-dependent kinase inhibitor 3 [EC:3.1.3.16 3.1.3.48] | (RefSeq) CDKN3, CDI1, CIP2, KAP, KAP1; cyclin dependent kinase inhibitor 3	--	[V]	Defense mechanisms	Cyclin-dependent kinase inhibitor 3 (CDKN3)	Cyclin-dependent kinase inhibitor 3 OS=Homo sapiens OX=9606 GN=CDKN3 PE=1 SV=1	V	Defense mechanisms	unnamed protein product [Homo sapiens]	biological process: metabolic process (GO:0008152);; biological process: cellular process (GO:0009987);; molecular function: catalytic activity (GO:0003824);; cellular component: cell (GO:0005623);; cellular component: cell part (GO:0044464)
ENSG00000168393	DTYMK	20.362779	1105	22.703628	978	20.930037	864	55.203511	2690	54.140739	2338	71.810868	3268	9.86E-18	-1.622892481	down	[F]	Nucleotide transport and metabolism	Molecular Function: thymidylate kinase activity (GO:0004798);; Molecular Function: ATP binding (GO:0005524);; Cellular Component: mitochondrial intermembrane space (GO:0005758);; Cellular Component: mitochondrial matrix (GO:0005759);; Biological Process: dTDP biosynthetic process (GO:0006233);; Biological Process: dTTP biosynthetic process (GO:0006235);; Biological Process: response to estrogen (…	K00943|1.5e-116|hsa:1841|K00943 dTMP kinase [EC:2.7.4.9] | (RefSeq) DTYMK, CDC8, PP3731, TMPK, TYMK; deoxythymidylate kinase	Pyrimidine metabolism (ko00240)	[F]	Nucleotide transport and metabolism	Thymidylate kinase	Thymidylate kinase OS=Homo sapiens OX=9606 GN=DTYMK PE=1 SV=4	F	Nucleotide transport and metabolism	thymidylate kinase isoform 1 [Homo sapiens]	biological process: metabolic process (GO:0008152);; biological process: cellular process (GO:0009987);; biological process: single-organism process (GO:0044699);; molecular function: catalytic activity (GO:0003824);; molecular function: binding (GO:0005488);; cellular component: cell (GO:0005623);; cellular component: membrane-enclosed lumen (GO:0031974);; cellular component: organelle (GO:00432…
ENSG00000142632	ARHGEF19	2.123015	296	1.002715	110	2.184447	223	5.264874	645	5.242193	576	5.370537	618	1.46E-09	-1.622589096	down	--	--	Molecular Function: guanyl-nucleotide exchange factor activity (GO:0005085);;	K20691|0.0e+00|hsa:128272|K20691 Rho guanine nucleotide exchange factor 19 | (RefSeq) ARHGEF19, WGEF; Rho guanine nucleotide exchange factor 19	--	[T]	Signal transduction mechanisms	RhoGEF domain	Rho guanine nucleotide exchange factor 19 OS=Homo sapiens OX=9606 GN=ARHGEF19 PE=1 SV=1	T	Signal transduction mechanisms	rho guanine nucleotide exchange factor 19 [Homo sapiens]	biological process: biological regulation (GO:0065007);; molecular function: molecular function regulator (GO:0098772)
ENSG00000025770	NCAPH2	11.409823	1047	12.011502	858	11.336849	789	28.668382	2335	29.486758	2163	39.758155	3032	8.61E-17	-1.616184551	down	--	--	Cellular Component: nucleoplasm (GO:0005654);; Cellular Component: cell junction (GO:0030054);; Biological Process: chromosome condensation (GO:0030261);; Cellular Component: intercellular bridge (GO:0045171);;	K11490|0.0e+00|hsa:29781|K11490 condensin-2 complex subunit H2 | (RefSeq) NCAPH2, CAPH2; non-SMC condensin II complex subunit H2	--	--	--	Condensin II complex subunit CAP-H2 or CNDH2, C-term	Condensin-2 complex subunit H2 OS=Homo sapiens OX=9606 GN=NCAPH2 PE=1 SV=1	S	Function unknown	kleisin beta, isoform CRA_g [Homo sapiens]	cellular component: cell (GO:0005623);; cellular component: organelle (GO:0043226);; cellular component: organelle part (GO:0044422);; cellular component: cell part (GO:0044464);; cellular component: cell junction (GO:0030054);; biological process: cellular process (GO:0009987);; biological process: cellular component organization or biogenesis (GO:0071840);; cellular component: extracellular reg…
ENSG00000035499	DEPDC1B	1.172192	137	1.82767	167	1.394704	122	4.85075	480	4.467036	405	3.823219	358	2.07E-12	-1.613679414	down	--	--	Biological Process: intracellular signal transduction (GO:0035556);;	K12472|2.8e-55|myi:110445212|K12472 epidermal growth factor receptor substrate 15 | (RefSeq) uncharacterized protein LOC110445212	Endocytosis (ko04144)	--	--	Domain found in Dishevelled, Egl-10, and Pleckstrin (DEP)	DEP domain-containing protein 1B OS=Homo sapiens OX=9606 GN=DEPDC1B PE=1 SV=2	T	Signal transduction mechanisms	DEP domain-containing protein 1B isoform 1 [Homo sapiens]	biological process: cellular process (GO:0009987);; biological process: signaling (GO:0023052);; biological process: single-organism process (GO:0044699);; biological process: response to stimulus (GO:0050896);; biological process: biological regulation (GO:0065007)
Homo_sapiens_newGene_8423	--	0.558313	116	0.479401	78	0.381615	59	1.75744	317	1.728697	283	0.910674	155	3.05E-08	-1.611505656	down	--	--	--	--	--	--	--	--	--	--	--	unnamed protein product [Homo sapiens]	--
ENSG00000112029	FBXO5	2.905826	300	3.004829	235	2.763789	213	9.400851	810	10.059306	791	6.335314	515	5.04E-15	-1.609402138	down	--	--	Biological Process: reproduction (GO:0000003);; Biological Process: G1/S transition of mitotic cell cycle (GO:0000082);; Biological Process: regulation of transcription involved in G1/S transition of mitotic cell cycle (GO:0000083);; Biological Process: meiotic spindle organization (GO:0000212);; Biological Process: microtubule cytoskeleton organization (GO:0000226);; Biological Process: mitotic …	K10292|6.7e-227|hsa:26271|K10292 F-box protein 5 | (RefSeq) FBXO5, EMI1, FBX5, Fbxo31; F-box protein 5	Oocyte meiosis (ko04114)	--	--	F-box domain	F-box only protein 5 OS=Homo sapiens OX=9606 GN=FBXO5 PE=1 SV=1	K	Transcription	F-box only protein 5 isoform a [Homo sapiens]	biological process: reproduction (GO:0000003);; biological process: cellular process (GO:0009987);; biological process: single-organism process (GO:0044699);; biological process: biological regulation (GO:0065007);; biological process: reproductive process (GO:0022414);; biological process: cellular component organization or biogenesis (GO:0071840);; biological process: multicellular organismal p…
Homo_sapiens_newGene_8494	--	0.394262	45	0.554302	49	0.282437	24	1.710348	168	1.177646	105	1.067451	99	1.83E-06	-1.601163031	down	--	--	--	--	--	--	--	--	--	--	--	--	--
ENSG00000160298	C21orf58	1.325699	179	1.753009	162	1.297774	115	3.637323	413	4.130655	418	5.5616	438	7.06E-14	-1.594443637	down	--	--	--	--	--	--	--	Domain of unknown function (DUF4587)	Uncharacterized protein C21orf58 OS=Homo sapiens OX=9606 GN=C21orf58 PE=2 SV=2	S	Function unknown	uncharacterized protein C21orf58 isoform 1 [Homo sapiens]	--
ENSG00000134057	CCNB1	18.015381	1813	20.312481	1544	18.652342	1387	51.453389	4484	58.396219	4569	47.212062	3818	1.18E-29	-1.59097715	down	--	--	Cellular Component: cytosol (GO:0005829);; Cellular Component: host cell nucleus (GO:0042025);;	K05868|1.7e-207|hsa:891|K05868 G2/mitotic-specific cyclin-B1 | (RefSeq) CCNB1, CCNB; cyclin B1	FoxO signaling pathway (ko04068);; Cell cycle (ko04110);; Oocyte meiosis (ko04114);; p53 signaling pathway (ko04115);; Cellular senescence (ko04218);; Progesterone-mediated oocyte maturation (ko04914);; Human immunodeficiency virus 1 infection (ko05170)	[D]	Cell cycle control, cell division, chromosome partitioning	Cyclin, N-terminal domain	G2/mitotic-specific cyclin-B1 OS=Homo sapiens OX=9606 GN=CCNB1 PE=1 SV=1	D	Cell cycle control, cell division, chromosome partitioning	G2/mitotic-specific cyclin-B1 [Pan troglodytes]	cellular component: cell (GO:0005623);; cellular component: cell part (GO:0044464);; cellular component: other organism (GO:0044215);; cellular component: other organism part (GO:0044217)
ENSG00000111206	FOXM1	10.326061	1628	16.627049	2056	12.124265	1441	36.516862	5026	34.8159	4341	38.728171	5039	1.63E-15	-1.590692902	down	--	--	Biological Process: G2/M transition of mitotic cell cycle (GO:0000086);; Molecular Function: transcription factor activity, sequence-specific DNA binding (GO:0003700);; Cellular Component: nucleus (GO:0005634);; Molecular Function: sequence-specific DNA binding (GO:0043565);;	K09406|0.0e+00|hsa:2305|K09406 forkhead box protein M | (RefSeq) FOXM1, FKHL16, FOXM1A, FOXM1B, FOXM1C, HFH-11, HFH11, HNF-3, INS-1, MPHOSPH2, MPP-2, MPP2, PIG29, TRIDENT; forkhead box M1	Cellular senescence (ko04218)	[K]	Transcription	Forkhead domain	Forkhead box protein M1 OS=Homo sapiens OX=9606 GN=FOXM1 PE=1 SV=3	K	Transcription	forkhead box protein M1 isoform 4 [Homo sapiens]	biological process: cellular process (GO:0009987);; biological process: single-organism process (GO:0044699);; biological process: biological regulation (GO:0065007);; molecular function: nucleic acid binding transcription factor activity (GO:0001071);; cellular component: cell (GO:0005623);; cellular component: organelle (GO:0043226);; cellular component: cell part (GO:0044464);; molecular funct…
Homo_sapiens_newGene_8784	--	12.484151	250	6.967558	110	11.864907	179	26.536079	465	29.673435	471	35.03524	576	8.65E-10	-1.584696546	down	--	--	Biological Process: ribosomal small subunit assembly (GO:0000028);; Molecular Function: structural constituent of ribosome (GO:0003735);; Molecular Function: laminin receptor activity (GO:0005055);; Cellular Component: basement membrane (GO:0005604);; Cellular Component: nucleus (GO:0005634);; Cellular Component: plasma membrane (GO:0005886);; Biological Process: translation (GO:0006412);; Cellul…	K02998|6.0e-19|sbq:101046493|K02998 small subunit ribosomal protein SAe | (RefSeq) 40S ribosomal protein SA-like	Ribosome (ko03010)	[J]	Translation, ribosomal structure and biogenesis	--	40S ribosomal protein SA OS=Homo sapiens OX=9606 GN=RPSA PE=1 SV=4	J	Translation, ribosomal structure and biogenesis	PREDICTED: 40S ribosomal protein SA-like [Saimiri boliviensis boliviensis]	biological process: cellular process (GO:0009987);; biological process: cellular component organization or biogenesis (GO:0071840);; molecular function: structural molecule activity (GO:0005198);; molecular function: molecular transducer activity (GO:0060089);; cellular component: extracellular region (GO:0005576);; cellular component: extracellular region part (GO:0044421);; cellular component: …
ENSG00000068489	PRR11	25.284664	2740	35.593259	3019	24.881683	2023	84.295255	7909	87.348167	7465	69.063115	6063	4.20E-18	-1.579589587	down	--	--	Cellular Component: cellular_component (GO:0005575);; Cellular Component: intracellular (GO:0005622);; Cellular Component: cell (GO:0005623);; Cellular Component: nucleus (GO:0005634);; Cellular Component: cytoplasm (GO:0005737);; Biological Process: cell cycle (GO:0007049);; Biological Process: cell cycle arrest (GO:0007050);; Biological Process: biological_process (GO:0008150);; Biological Proc…	K18734|1.3e-59|fch:102052155|K18734 protein SMG8 | (RefSeq) PRR11; proline-rich protein 11	--	--	--	--	Proline-rich protein 11 OS=Homo sapiens OX=9606 GN=PRR11 PE=1 SV=1	S	Function unknown	proline-rich protein 11 [Homo sapiens]	cellular component: cell (GO:0005623);; cellular component: cell part (GO:0044464);; cellular component: organelle (GO:0043226);; biological process: cellular process (GO:0009987);; biological process: single-organism process (GO:0044699);; biological process: biological regulation (GO:0065007)
ENSG00000000460	C1orf112	5.792897	758	5.043374	583	5.405845	577	17.377647	2053	16.102141	1817	10.909009	1347	6.44E-20	-1.573495217	down	--	--	--	--	--	--	--	Domain of unknown function (DUF4487)	Uncharacterized protein C1orf112 OS=Homo sapiens OX=9606 GN=C1orf112 PE=1 SV=1	S	Function unknown	uncharacterized protein C1orf112 isoform 1 [Homo sapiens]	--
ENSG00000006047	YBX2	2.623611	195	3.244184	189	2.255311	126	6.553872	425	6.564343	386	10.203415	622	2.03E-09	-1.571156637	down	[K]	Transcription	Molecular Function: nucleic acid binding (GO:0003676);; Cellular Component: cytoplasm (GO:0005737);; Biological Process: oocyte development (GO:0048599);;	K09277|3.5e-174|hsa:51087|K09277 Y-box-binding protein 2 | (RefSeq) YBX2, CONTRIN, CSDA3, DBPC, MSY2; Y-box binding protein 2	--	[J]	Translation, ribosomal structure and biogenesis	'Cold-shock' DNA-binding domain	Y-box-binding protein 2 OS=Homo sapiens OX=9606 GN=YBX2 PE=1 SV=2	K	Transcription	Y-box-binding protein 2 [Homo sapiens]	molecular function: binding (GO:0005488);; cellular component: cell (GO:0005623);; cellular component: cell part (GO:0044464);; biological process: reproduction (GO:0000003);; biological process: cellular process (GO:0009987);; biological process: reproductive process (GO:0022414);; biological process: multicellular organismal process (GO:0032501);; biological process: developmental process (GO:0…
ENSG00000187741	FANCA	2.0355	446	2.976089	499	2.339817	382	7.18256	1330	7.194544	1231	6.066485	1077	3.01E-17	-1.565891002	down	--	--	Biological Process: interstrand cross-link repair (GO:0036297);; Cellular Component: Fanconi anaemia nuclear complex (GO:0043240);;	K10888|0.0e+00|hsa:2175|K10888 fanconi anemia group A protein | (RefSeq) FANCA, FA, FA-H, FA1, FAA, FACA, FAH, FANCH; FA complementation group A	Fanconi anemia pathway (ko03460)	--	--	Fanconi anaemia group A protein N terminus	Fanconi anemia group A protein OS=Homo sapiens OX=9606 GN=FANCA PE=1 SV=2	K	Transcription	Fanconi anemia group A protein isoform a [Homo sapiens]	biological process: metabolic process (GO:0008152);; biological process: cellular process (GO:0009987);; biological process: response to stimulus (GO:0050896);; cellular component: cell (GO:0005623);; cellular component: membrane-enclosed lumen (GO:0031974);; cellular component: macromolecular complex (GO:0032991);; cellular component: organelle (GO:0043226);; cellular component: organelle part (…
ENSG00000076003	MCM6	9.058794	1580	9.273646	1266	8.59347	1123	26.265232	4001	28.259396	3903	19.315659	2765	2.64E-21	-1.565462402	down	[L]	Replication, recombination and repair	Molecular Function: DNA binding (GO:0003677);; Molecular Function: DNA helicase activity (GO:0003678);; Molecular Function: ATP binding (GO:0005524);; Cellular Component: nucleus (GO:0005634);; Biological Process: DNA replication initiation (GO:0006270);; Cellular Component: MCM complex (GO:0042555);;	K02542|0.0e+00|hsa:4175|K02542 DNA replication licensing factor MCM6 [EC:3.6.4.12] | (RefSeq) MCM6, MCG40308, Mis5, P105MCM; minichromosome maintenance complex component 6	DNA replication (ko03030);; Cell cycle (ko04110)	[L]	Replication, recombination and repair	MCM P-loop domain	DNA replication licensing factor MCM6 OS=Homo sapiens OX=9606 GN=MCM6 PE=1 SV=1	L	Replication, recombination and repair	DNA replication licensing factor MCM6 [Homo sapiens]	molecular function: binding (GO:0005488);; molecular function: catalytic activity (GO:0003824);; cellular component: cell (GO:0005623);; cellular component: organelle (GO:0043226);; cellular component: cell part (GO:0044464);; biological process: metabolic process (GO:0008152);; biological process: cellular process (GO:0009987);; cellular component: macromolecular complex (GO:0032991)
ENSG00000198901	PRC1	6.642746	1083	10.944482	1489	8.639763	1179	28.815087	4326	28.07473	3812	18.018948	2553	1.31E-11	-1.559939436	down	--	--	Biological Process: microtubule bundle formation (GO:0001578);; Cellular Component: cytoskeleton (GO:0005856);; Molecular Function: microtubule binding (GO:0008017);; Biological Process: regulation of cytokinesis (GO:0032465);;	K16732|0.0e+00|pps:100975818|K16732 protein regulator of cytokinesis 1 | (RefSeq) PRC1; protein regulator of cytokinesis 1	--	[DZ]	Cell cycle control, cell division, chromosome partitioning;; Cytoskeleton	Microtubule associated protein (MAP65/ASE1 family)	Protein regulator of cytokinesis 1 OS=Homo sapiens OX=9606 GN=PRC1 PE=1 SV=2	Z	Cytoskeleton	protein regulator of cytokinesis 1 isoform 2 [Homo sapiens]	biological process: cellular process (GO:0009987);; biological process: cellular component organization or biogenesis (GO:0071840);; cellular component: cell (GO:0005623);; cellular component: organelle (GO:0043226);; cellular component: cell part (GO:0044464);; molecular function: binding (GO:0005488);; biological process: biological regulation (GO:0065007)
ENSG00000249115	HAUS5	2.987416	559	3.651355	550	2.760664	393	8.083801	1354	7.767009	1199	9.501656	1486	5.70E-16	-1.556000258	down	--	--	Biological Process: spindle assembly (GO:0051225);; Cellular Component: HAUS complex (GO:0070652);;	K16588|7.5e-38|pps:100982409|K16588 HAUS augmin-like complex subunit 5 | (RefSeq) HAUS5; HAUS augmin like complex subunit 5	--	--	--	HAUS augmin-like complex subunit 5	HAUS augmin-like complex subunit 5 OS=Homo sapiens OX=9606 GN=HAUS5 PE=1 SV=2	Z	Cytoskeleton	HAUS5 isoform 4 [Pan troglodytes]	biological process: cellular process (GO:0009987);; biological process: single-organism process (GO:0044699);; biological process: cellular component organization or biogenesis (GO:0071840);; cellular component: cell (GO:0005623);; cellular component: macromolecular complex (GO:0032991);; cellular component: organelle (GO:0043226);; cellular component: organelle part (GO:0044422);; cellular compo…
ENSG00000162062	TEDC2	3.816984	288	3.175828	193	3.45551	191	8.766934	595	8.319177	502	11.648254	711	8.88E-13	-1.555586204	down	--	--	--	K10289|2.0e-13|egz:104127490|K10289 F-box protein 1 (cyclin F) | (RefSeq) CCNF; cyclin-F	--	--	--	Domain of unknown function (DUF4693)	Tubulin epsilon and delta complex protein 2 OS=Homo sapiens OX=9606 GN=TEDC2 PE=1 SV=1	S	Function unknown	C16orf59 isoform 5 [Pan troglodytes]	--
ENSG00000188175	HEPACAM2	0.981455	99	0.669193	54	0.874845	67	2.68893	232	2.384374	190	2.278567	188	1.66E-09	-1.553183363	down	--	--	Cellular Component: nucleoplasm (GO:0005654);; Cellular Component: integral component of membrane (GO:0016021);; Cellular Component: intracellular membrane-bounded organelle (GO:0043231);; Cellular Component: mitotic spindle (GO:0072686);;	K23116|3.8e-24|nni:104022698|K23116 hepatocyte cell adhesion molecule | (RefSeq) HEPACAM; LOW QUALITY PROTEIN: hepatocyte cell adhesion molecule	--	--	--	Immunoglobulin domain	HEPACAM family member 2 OS=Homo sapiens OX=9606 GN=HEPACAM2 PE=1 SV=1	T	Signal transduction mechanisms	HEPACAM family member 2 isoform 1 precursor [Homo sapiens]	cellular component: cell (GO:0005623);; cellular component: organelle (GO:0043226);; cellular component: organelle part (GO:0044422);; cellular component: cell part (GO:0044464);; cellular component: membrane (GO:0016020);; cellular component: membrane part (GO:0044425)
ENSG00000105825	TFPI2	1.120582	119	0.406187	33	0.744782	52	2.276563	198	2.772794	222	2.253979	168	3.43E-06	-1.552981324	down	--	--	Molecular Function: serine-type endopeptidase inhibitor activity (GO:0004867);; Cellular Component: extracellular region (GO:0005576);; Biological Process: blood coagulation (GO:0007596);;	K23087|1.3e-140|hsa:7980|K23087 tissue factor pathway inhibitor 2 | (RefSeq) TFPI2, PP5, REF1, TFPI-2; tissue factor pathway inhibitor 2	--	[O]	Posttranslational modification, protein turnover, chaperones	Kunitz/Bovine pancreatic trypsin inhibitor domain	Tissue factor pathway inhibitor 2 OS=Homo sapiens OX=9606 GN=TFPI2 PE=1 SV=1	O	Posttranslational modification, protein turnover, chaperones	tissue factor pathway inhibitor 2 isoform 1 precursor [Homo sapiens]	biological process: biological regulation (GO:0065007);; molecular function: molecular function regulator (GO:0098772);; cellular component: extracellular region (GO:0005576);; biological process: multicellular organismal process (GO:0032501);; biological process: single-organism process (GO:0044699)
ENSG00000175183	CSRP2	0.436211	20	0.288391	10	0.514325	17	1.582313	61	1.549021	54	1.210353	42	0.000101763	-1.550047879	down	--	--	Molecular Function: metal ion binding (GO:0046872);;	K09377|5.5e-118|aju:106967397|K09377 cysteine and glycine-rich protein | (RefSeq) CSRP2; cysteine and glycine-rich protein 2	--	[TZ]	Signal transduction mechanisms;; Cytoskeleton	LIM domain	Cysteine and glycine-rich protein 2 OS=Homo sapiens OX=9606 GN=CSRP2 PE=1 SV=3	--	--	cysteine and glycine-rich protein 2 [Carlito syrichta]	molecular function: binding (GO:0005488)
ENSG00000175305	CCNE2	3.962289	416	4.495695	383	4.34976	288	12.921599	1440	11.870139	1196	4.151697	507	4.70E-08	-1.548591859	down	--	--	Biological Process: G1/S transition of mitotic cell cycle (GO:0000082);; Biological Process: telomere maintenance (GO:0000723);; Biological Process: DNA replication initiation (GO:0006270);; Biological Process: synapsis (GO:0007129);; Molecular Function: cyclin-dependent protein serine/threonine kinase regulator activity (GO:0016538);; Molecular Function: protein kinase binding (GO:0019901);; Cel…	K06626|3.8e-230|hsa:9134|K06626 G1/S-specific cyclin-E1 | (RefSeq) CCNE2, CYCE2; cyclin E2	Cell cycle (ko04110);; Oocyte meiosis (ko04114);; p53 signaling pathway (ko04115);; PI3K-Akt signaling pathway (ko04151);; Cellular senescence (ko04218);; Cushing syndrome (ko04934);; Hepatitis B (ko05161);; Measles (ko05162);; Human papillomavirus infection (ko05165);; Human T-cell leukemia virus 1 infection (ko05166);; Epstein-Barr virus infection (ko05169);; Pathways in cancer (ko05200);; Vira…	[D]	Cell cycle control, cell division, chromosome partitioning	Cyclin, N-terminal domain	G1/S-specific cyclin-E2 OS=Homo sapiens OX=9606 GN=CCNE2 PE=1 SV=1	D	Cell cycle control, cell division, chromosome partitioning	G1/S-specific cyclin-E2 [Homo sapiens]	biological process: cellular process (GO:0009987);; biological process: single-organism process (GO:0044699);; biological process: metabolic process (GO:0008152);; biological process: biological regulation (GO:0065007);; biological process: cellular component organization or biogenesis (GO:0071840);; biological process: reproduction (GO:0000003);; biological process: reproductive process (GO:0022…
ENSG00000185347	TEDC1	5.770716	423	5.606762	336	5.875278	344	13.962613	895	15.219849	921	19.019729	1127	2.52E-15	-1.546926284	down	--	--	--	--	--	--	--	Domain of unknown function (DUF4510)	Tubulin epsilon and delta complex protein 1 OS=Homo sapiens OX=9606 GN=TEDC1 PE=1 SV=2	S	Function unknown	tubulin epsilon and delta complex protein 1 isoform 5 [Homo sapiens]	--
ENSG00000115318	LOXL3	0.484711	72	0.444565	57	0.630497	77	1.70216	207	2.327855	196	1.907456	175	6.23E-09	-1.535216323	down	--	--	Molecular Function: protein-lysine 6-oxidase activity (GO:0004720);; Molecular Function: scavenger receptor activity (GO:0005044);; Molecular Function: copper ion binding (GO:0005507);; Cellular Component: extracellular space (GO:0005615);; Cellular Component: membrane (GO:0016020);; Biological Process: peptidyl-lysine oxidation (GO:0018057);;	K00280|0.0e+00|hsa:84695|K00280 lysyl oxidase-like protein 2/3/4 [EC:1.4.3.-] | (RefSeq) LOXL3, LOXL; lysyl oxidase like 3	--	--	--	Lysyl oxidase	Lysyl oxidase homolog 3 OS=Homo sapiens OX=9606 GN=LOXL3 PE=1 SV=1	O	Posttranslational modification, protein turnover, chaperones	lysyl oxidase homolog 3 isoform 1 precursor [Homo sapiens]	biological process: metabolic process (GO:0008152);; biological process: single-organism process (GO:0044699);; molecular function: catalytic activity (GO:0003824);; biological process: localization (GO:0051179);; molecular function: molecular transducer activity (GO:0060089);; molecular function: binding (GO:0005488);; cellular component: extracellular region (GO:0005576);; cellular component: e…
ENSG00000076248	UNG	15.475955	1540	15.025518	1168	15.995273	1192	38.392311	3295	43.177355	3351	43.310095	3483	7.46E-25	-1.534374248	down	[L]	Replication, recombination and repair	Molecular Function: uracil DNA N-glycosylase activity (GO:0004844);; Cellular Component: nucleus (GO:0005634);; Cellular Component: mitochondrion (GO:0005739);; Biological Process: base-excision repair (GO:0006284);;	K03648|4.7e-149|pon:100171406|K03648 uracil-DNA glycosylase [EC:3.2.2.27] | (RefSeq) UNG; uracil-DNA glycosylase	Base excision repair (ko03410);; Primary immunodeficiency (ko05340)	[L]	Replication, recombination and repair	Uracil DNA glycosylase superfamily	Uracil-DNA glycosylase OS=Homo sapiens OX=9606 GN=UNG PE=1 SV=2	L	Replication, recombination and repair	uracil-DNA glycosylase isoform UNG1 precursor [Homo sapiens]	molecular function: catalytic activity (GO:0003824);; cellular component: cell (GO:0005623);; cellular component: organelle (GO:0043226);; cellular component: cell part (GO:0044464);; biological process: metabolic process (GO:0008152);; biological process: cellular process (GO:0009987);; biological process: response to stimulus (GO:0050896)
ENSG00000181938	GINS3	2.361587	240	3.419902	279	1.459811	107	6.327536	587	7.471199	613	6.430296	536	3.64E-08	-1.530595622	down	--	--	Cellular Component: nucleoplasm (GO:0005654);; Biological Process: DNA replication (GO:0006260);;	K10734|2.0e-121|hsa:64785|K10734 GINS complex subunit 3 | (RefSeq) GINS3, PSF3; GINS complex subunit 3	--	[S]	Function unknown	GINS complex protein	DNA replication complex GINS protein PSF3 OS=Homo sapiens OX=9606 GN=GINS3 PE=1 SV=1	L	Replication, recombination and repair	DNA replication complex GINS protein PSF3 isoform b [Homo sapiens]	cellular component: cell (GO:0005623);; cellular component: organelle (GO:0043226);; cellular component: organelle part (GO:0044422);; cellular component: cell part (GO:0044464);; biological process: metabolic process (GO:0008152);; biological process: cellular process (GO:0009987)
ENSG00000137193	PIM1	0.504536	63	0.812794	79	0.38263	36	1.698522	184	1.428006	140	1.862008	190	1.15E-06	-1.529893506	down	[T]	Signal transduction mechanisms	Molecular Function: protein serine/threonine kinase activity (GO:0004674);; Molecular Function: ATP binding (GO:0005524);; Cellular Component: nucleolus (GO:0005730);; Cellular Component: cytosol (GO:0005829);; Molecular Function: manganese ion binding (GO:0030145);; Biological Process: hyaluronan metabolic process (GO:0030212);; Biological Process: negative regulation of apoptotic process (GO:00…	K04702|1.9e-184|csab:103221573|K04702 proto-oncogene serine/threonine-protein kinase Pim-1 [EC:2.7.11.1] | (RefSeq) PIM1; Pim-1 proto-oncogene, serine/threonine kinase	JAK-STAT signaling pathway (ko04630);; AGE-RAGE signaling pathway in diabetic complications (ko04933);; Pathways in cancer (ko05200);; MicroRNAs in cancer (ko05206);; Acute myeloid leukemia (ko05221)	[T]	Signal transduction mechanisms	Protein kinase domain	Serine/threonine-protein kinase pim-1 OS=Homo sapiens OX=9606 GN=PIM1 PE=1 SV=4	T	Signal transduction mechanisms	serine/threonine-protein kinase pim-1 isoform 2 [Homo sapiens]	biological process: metabolic process (GO:0008152);; biological process: cellular process (GO:0009987);; molecular function: catalytic activity (GO:0003824);; molecular function: binding (GO:0005488);; cellular component: cell (GO:0005623);; cellular component: organelle (GO:0043226);; cellular component: organelle part (GO:0044422);; cellular component: cell part (GO:0044464);; biological proces…
ENSG00000139734	DIAPH3	0.717474	161	1.132541	198	0.845103	142	4.019337	612	3.027167	538	1.962357	279	5.09E-08	-1.522393408	down	--	--	Molecular Function: actin binding (GO:0003779);; Molecular Function: Rho GTPase binding (GO:0017048);; Biological Process: actin cytoskeleton organization (GO:0030036);;	K05745|0.0e+00|hsa:81624|K05745 diaphanous 3 | (RefSeq) DIAPH3, AN, AUNA1, DIA2, DRF3, NSDAN, diap3, mDia2; diaphanous related formin 3	Regulation of actin cytoskeleton (ko04810)	[TZ]	Signal transduction mechanisms;; Cytoskeleton	Formin Homology 2 Domain	Protein diaphanous homolog 3 OS=Homo sapiens OX=9606 GN=DIAPH3 PE=1 SV=4	Z	Cytoskeleton	protein diaphanous homolog 3 isoform a [Homo sapiens]	molecular function: binding (GO:0005488);; biological process: cellular process (GO:0009987);; biological process: single-organism process (GO:0044699);; biological process: cellular component organization or biogenesis (GO:0071840)
ENSG00000285816	AP000944.2	3.353015	667	5.782182	899	3.306441	493	17.74321	3079	6.00751	945	22.184885	3618	0.000677638	-1.517305296	down	--	--	Molecular Function: DNA binding (GO:0003677);; Cellular Component: nucleus (GO:0005634);; Biological Process: DNA replication (GO:0006260);;	K02321|0.0e+00|hsa:23649|K02321 DNA polymerase alpha subunit B | (RefSeq) POLA2; DNA polymerase alpha 2, accessory subunit	DNA replication (ko03030)	[L]	Replication, recombination and repair	DNA polymerase alpha/epsilon subunit B	DNA polymerase alpha subunit B OS=Homo sapiens OX=9606 GN=POLA2 PE=1 SV=2	L	Replication, recombination and repair	DNA polymerase alpha subunit B [Homo sapiens]	molecular function: binding (GO:0005488);; cellular component: cell (GO:0005623);; cellular component: organelle (GO:0043226);; cellular component: cell part (GO:0044464);; biological process: metabolic process (GO:0008152);; biological process: cellular process (GO:0009987)
ENSG00000080986	NDC80	3.773341	372	4.831358	371	4.631837	349	15.193469	1315	14.196546	1122	7.072961	583	2.56E-09	-1.508456593	down	--	--	Cellular Component: nucleoplasm (GO:0005654);; Cellular Component: centrosome (GO:0005813);; Cellular Component: Ndc80 complex (GO:0031262);; Biological Process: attachment of mitotic spindle microtubules to kinetochore (GO:0051315);;	K11547|0.0e+00|hsa:10403|K11547 kinetochore protein NDC80 | (RefSeq) NDC80, HEC, HEC1, HsHec1, KNTC2, TID3, hsNDC80; NDC80 kinetochore complex component	--	[D]	Cell cycle control, cell division, chromosome partitioning	HEC/Ndc80p family	Kinetochore protein NDC80 homolog OS=Homo sapiens OX=9606 GN=NDC80 PE=1 SV=1	D	Cell cycle control, cell division, chromosome partitioning	kinetochore protein NDC80 homolog [Homo sapiens]	cellular component: cell (GO:0005623);; cellular component: organelle (GO:0043226);; cellular component: organelle part (GO:0044422);; cellular component: cell part (GO:0044464);; cellular component: macromolecular complex (GO:0032991);; biological process: cellular process (GO:0009987);; biological process: single-organism process (GO:0044699)
ENSG00000140525	FANCI	3.490979	759	4.316522	708	2.774095	448	13.31387	2388	11.851281	1977	5.417345	922	2.86E-08	-1.508258741	down	--	--	Biological Process: DNA repair (GO:0006281);;	K10895|0.0e+00|hsa:55215|K10895 fanconi anemia group I protein | (RefSeq) FANCI, KIAA1794; FA complementation group I	Fanconi anemia pathway (ko03460)	[S]	Function unknown	FANCI solenoid 4	Fanconi anemia group I protein OS=Homo sapiens OX=9606 GN=FANCI PE=1 SV=4	L	Replication, recombination and repair	Fanconi anemia group I protein isoform 1 [Homo sapiens]	biological process: metabolic process (GO:0008152);; biological process: cellular process (GO:0009987);; biological process: response to stimulus (GO:0050896)
ENSG00000119333	WDR34	52.734986	4252	50.40885	3210	55.430035	3378	124.5246	8789	131.005052	8467	153.483429	10256	1.00E-19	-1.495661466	down	--	--	Cellular Component: cytosol (GO:0005829);;	K22868|1.8e-299|hsa:89891|K22868 WD repeat-containing protein 34 | (RefSeq) DYNC2I2, CFAP133, DIC5, FAP133, SRTD11, WDR34, bA216B9.3; dynein 2 intermediate chain 2	--	[Z]	Cytoskeleton	WD domain, G-beta repeat	Cytoplasmic dynein 2 intermediate chain 2 OS=Homo sapiens OX=9606 GN=DYNC2I2 PE=1 SV=2	Z	Cytoskeleton	WD repeat-containing protein 34 [Homo sapiens]	cellular component: cell (GO:0005623);; cellular component: cell part (GO:0044464)
ENSG00000090889	KIF4A	4.078785	828	5.079461	807	4.137753	630	12.987475	2303	12.652423	2034	9.12047	1520	2.25E-16	-1.49022187	down	--	--	Molecular Function: microtubule motor activity (GO:0003777);; Molecular Function: ATP binding (GO:0005524);; Biological Process: microtubule-based movement (GO:0007018);; Molecular Function: microtubule binding (GO:0008017);;	K10395|0.0e+00|ggo:101127650|K10395 kinesin family member 4 | (RefSeq) KIF4A; chromosome-associated kinesin KIF4A	--	[Z]	Cytoskeleton	Kinesin motor domain	Chromosome-associated kinesin KIF4A OS=Homo sapiens OX=9606 GN=KIF4A PE=1 SV=3	Z	Cytoskeleton	chromosome-associated kinesin KIF4A [Homo sapiens]	molecular function: catalytic activity (GO:0003824);; molecular function: binding (GO:0005488);; biological process: cellular process (GO:0009987);; biological process: single-organism process (GO:0044699)
ENSG00000161800	RACGAP1	10.981994	1435	14.271624	1393	11.250058	1153	36.151366	4215	34.222405	3423	23.824795	2595	4.68E-16	-1.476287385	down	--	--	Cellular Component: nucleoplasm (GO:0005654);; Biological Process: neuroblast proliferation (GO:0007405);; Biological Process: intracellular signal transduction (GO:0035556);; Biological Process: regulation of embryonic development (GO:0045995);; Molecular Function: metal ion binding (GO:0046872);;	K16733|0.0e+00|hsa:29127|K16733 Rac GTPase-activating protein 1 | (RefSeq) RACGAP1, CYK4, HsCYK-4, ID-GAP, MgcRacGAP; Rac GTPase activating protein 1	--	[R]	General function prediction only	RhoGAP domain	Rac GTPase-activating protein 1 OS=Homo sapiens OX=9606 GN=RACGAP1 PE=1 SV=1	T	Signal transduction mechanisms	rac GTPase-activating protein 1 isoform c [Homo sapiens]	cellular component: cell (GO:0005623);; cellular component: organelle (GO:0043226);; cellular component: organelle part (GO:0044422);; cellular component: cell part (GO:0044464);; biological process: single-organism process (GO:0044699);; biological process: cellular process (GO:0009987);; biological process: signaling (GO:0023052);; biological process: response to stimulus (GO:0050896);; biologi…
ENSG00000183765	CHEK2	5.401202	413	4.604856	286	4.384326	273	12.455173	881	11.676223	737	12.802827	813	1.34E-17	-1.474915728	down	--	--	Cellular Component: nucleoplasm (GO:0005654);; Cellular Component: Golgi apparatus (GO:0005794);;	K06641|1.5e-92|ggo:101124618|K06641 serine/threonine-protein kinase CHEK2 [EC:2.7.11.1] | (RefSeq) CHEK2; serine/threonine-protein kinase Chk2	Cell cycle (ko04110);; p53 signaling pathway (ko04115);; Cellular senescence (ko04218);; Human T-cell leukemia virus 1 infection (ko05166)	[D]	Cell cycle control, cell division, chromosome partitioning	FHA domain	Serine/threonine-protein kinase Chk2 OS=Homo sapiens OX=9606 GN=CHEK2 PE=1 SV=1	D	Cell cycle control, cell division, chromosome partitioning	protein kinase Chk2 transcript variant insZ [Homo sapiens]	cellular component: cell (GO:0005623);; cellular component: organelle (GO:0043226);; cellular component: organelle part (GO:0044422);; cellular component: cell part (GO:0044464)
ENSG00000204392	LSM2	20.136179	824	16.806402	538	17.081005	524	40.602097	1451	42.913288	1390	55.059254	1849	1.55E-13	-1.466736698	down	--	--	Biological Process: nuclear-transcribed mRNA catabolic process, deadenylation-dependent decay (GO:0000288);; Biological Process: nuclear-transcribed mRNA catabolic process, exonucleolytic (GO:0000291);; Biological Process: RNA splicing, via transesterification reactions (GO:0000375);; Biological Process: RNA splicing, via transesterification reactions with bulged adenosine as nucleophile (GO:0000…	K12621|4.7e-46|acs:100566131|K12621 U6 snRNA-associated Sm-like protein LSm2 | (RefSeq) lsm2; LSM2 homolog, U6 small nuclear RNA and mRNA degradation associated	RNA degradation (ko03018);; Spliceosome (ko03040)	[A]	RNA processing and modification	LSM domain	U6 snRNA-associated Sm-like protein LSm2 OS=Homo sapiens OX=9606 GN=LSM2 PE=1 SV=1	A	RNA processing and modification	PREDICTED: U6 snRNA-associated Sm-like protein LSm2 isoform X1 [Macaca fascicularis]	biological process: metabolic process (GO:0008152);; biological process: cellular process (GO:0009987);; biological process: biological regulation (GO:0065007);; cellular component: cell (GO:0005623);; cellular component: macromolecular complex (GO:0032991);; cellular component: organelle (GO:0043226);; cellular component: cell part (GO:0044464);; molecular function: binding (GO:0005488);; cellul…
ENSG00000170577	SIX2	0.363258	38	0.382669	31	0.324172	25	1.120937	101	0.908205	75	0.99607	85	7.22E-06	-1.465266064	down	--	--	Molecular Function: DNA binding (GO:0003677);; Cellular Component: nucleus (GO:0005634);;	K19472|1.4e-152|cjc:100397818|K19472 homeobox protein SIX2 | (RefSeq) SIX2; SIX homeobox 2	--	[K]	Transcription	Transcriptional regulator, SIX1, N-terminal SD domain	Homeobox protein SIX2 OS=Homo sapiens OX=9606 GN=SIX2 PE=1 SV=1	K	Transcription	homeobox protein SIX2 [Homo sapiens]	molecular function: binding (GO:0005488);; cellular component: cell (GO:0005623);; cellular component: organelle (GO:0043226);; cellular component: cell part (GO:0044464)
ENSG00000087494	PTHLH	0.516744	41	0.155199	11	0.415124	26	1.460503	73	1.827511	90	1.509565	68	0.000178607	-1.46274338	down	--	--	Molecular Function: hormone activity (GO:0005179);; Cellular Component: extracellular region (GO:0005576);; Cellular Component: nucleoplasm (GO:0005654);; Cellular Component: Golgi apparatus (GO:0005794);; Cellular Component: cytosol (GO:0005829);; Biological Process: bone mineralization (GO:0030282);;	K22608|9.2e-72|ggo:101127320|K22608 parathyroid hormone-related hormone | (RefSeq) PTHLH; parathyroid hormone-related protein isoform X1	Parathyroid hormone synthesis, secretion and action (ko04928)	--	--	Parathyroid hormone family	Parathyroid hormone-related protein OS=Homo sapiens OX=9606 GN=PTHLH PE=1 SV=1	S	Function unknown	parathyroid hormone-related protein isoform 2 preproprotein [Homo sapiens]	molecular function: binding (GO:0005488);; cellular component: extracellular region (GO:0005576);; cellular component: cell (GO:0005623);; cellular component: organelle (GO:0043226);; cellular component: organelle part (GO:0044422);; cellular component: cell part (GO:0044464);; biological process: multicellular organismal process (GO:0032501);; biological process: developmental process (GO:003250…
Homo_sapiens_newGene_8641	--	2.306781	81	1.997972	55	2.469333	65	5.745433	176	5.86816	163	6.354514	183	2.54E-08	-1.456020897	down	--	--	Molecular Function: GTPase activity (GO:0003924);; Molecular Function: structural constituent of cytoskeleton (GO:0005200);; Molecular Function: GTP binding (GO:0005525);; Cellular Component: nucleus (GO:0005634);; Cellular Component: cytoplasm (GO:0005737);; Cellular Component: microtubule (GO:0005874);; Molecular Function: protein domain specific binding (GO:0019904);; Molecular Function: GTPas…	K07375|2.5e-64|acs:100563630|K07375 tubulin beta | (RefSeq) tubb; tubulin beta-7 chain	Phagosome (ko04145);; Gap junction (ko04540)	[Z]	Cytoskeleton	Tubulin/FtsZ family, GTPase domain	Tubulin beta chain OS=Homo sapiens OX=9606 GN=TUBB PE=1 SV=2	Z	Cytoskeleton	tubulin beta chain [Macaca mulatta]	molecular function: catalytic activity (GO:0003824);; molecular function: structural molecule activity (GO:0005198);; molecular function: binding (GO:0005488);; cellular component: cell (GO:0005623);; cellular component: organelle (GO:0043226);; cellular component: cell part (GO:0044464);; cellular component: organelle part (GO:0044422);; cellular component: supramolecular complex (GO:0099080);; …
ENSG00000102384	CENPI	1.132297	173	1.515536	131	1.327391	102	3.820039	393	4.796988	350	3.271226	283	2.99E-11	-1.455688787	down	--	--	Cellular Component: kinetochore (GO:0000776);; Cellular Component: cytosol (GO:0005829);; Cellular Component: nuclear body (GO:0016604);; Biological Process: centromere complex assembly (GO:0034508);;	K11501|0.0e+00|hsa:2491|K11501 centromere protein I | (RefSeq) CENPI, CENP-I, FSHPRH1, LRPR1; centromere protein I	--	--	--	Mis6	Centromere protein I OS=Homo sapiens OX=9606 GN=CENPI PE=1 SV=2	S	Function unknown	centromere protein I isoform X1 [Pongo abelii]	cellular component: cell (GO:0005623);; cellular component: macromolecular complex (GO:0032991);; cellular component: organelle (GO:0043226);; cellular component: organelle part (GO:0044422);; cellular component: cell part (GO:0044464);; cellular component: membrane-enclosed lumen (GO:0031974);; biological process: cellular process (GO:0009987);; biological process: cellular component organizatio…
ENSG00000135451	TROAP	5.686762	525	6.689351	552	5.344305	366	14.835918	1301	13.06306	982	17.143261	1338	7.47E-12	-1.443377733	down	--	--	Cellular Component: cellular_component (GO:0005575);; Cellular Component: intracellular (GO:0005622);; Cellular Component: cell (GO:0005623);; Cellular Component: cytoplasm (GO:0005737);; Biological Process: cell adhesion (GO:0007155);; Biological Process: biological_process (GO:0008150);; Biological Process: biological adhesion (GO:0022610);; Cellular Component: intracellular part (GO:0044424);;…	--	--	--	--	--	Tastin OS=Homo sapiens OX=9606 GN=TROAP PE=1 SV=3	S	Function unknown	tastin isoform X1 [Homo sapiens]	cellular component: cell (GO:0005623);; cellular component: cell part (GO:0044464);; biological process: biological adhesion (GO:0022610)
ENSG00000186474	KLK12	1.18084	51	0.682395	26	1.400194	43	2.826386	119	2.973211	106	2.917473	99	6.15E-06	-1.44064754	down	--	--	--	--	--	--	--	--	--	--	--	KLK12 isoform 3, partial [Pan troglodytes]	--
ENSG00000090447	TFAP4	5.552357	546	4.911733	387	4.830187	368	11.310258	1021	11.448276	937	14.524352	1223	7.68E-14	-1.43902013	down	--	--	Molecular Function: protein dimerization activity (GO:0046983);;	K09108|3.4e-163|cjc:100391868|K09108 transcription factor AP-4 | (RefSeq) TFAP4; transcription factor AP-4	Proteoglycans in cancer (ko05205)	[K]	Transcription	Helix-loop-helix DNA-binding domain	Transcription factor AP-4 OS=Homo sapiens OX=9606 GN=TFAP4 PE=1 SV=2	K	Transcription	transcription factor AP-4 isoform X2 [Callithrix jacchus]	molecular function: binding (GO:0005488)
ENSG00000160447	PKN3	1.389388	219	1.088495	135	1.075227	127	2.566392	354	3.148684	393	3.383672	438	3.83E-10	-1.436281605	down	[U]	Intracellular trafficking, secretion, and vesicular transport	Molecular Function: protein serine/threonine kinase activity (GO:0004674);; Molecular Function: ATP binding (GO:0005524);; Biological Process: signal transduction (GO:0007165);; Molecular Function: GTP-Rho binding (GO:0017049);;	K23692|0.0e+00|hsa:29941|K23692 serine/threonine-protein kinase N3 [EC:2.7.11.13] | (RefSeq) PKN3, UTDP4-1; protein kinase N3	PI3K-Akt signaling pathway (ko04151)	[T]	Signal transduction mechanisms	Protein kinase domain	Serine/threonine-protein kinase N3 OS=Homo sapiens OX=9606 GN=PKN3 PE=1 SV=1	T	Signal transduction mechanisms	serine/threonine-protein kinase N3 isoform 1 [Homo sapiens]	biological process: metabolic process (GO:0008152);; biological process: cellular process (GO:0009987);; molecular function: catalytic activity (GO:0003824);; molecular function: binding (GO:0005488);; biological process: biological regulation (GO:0065007)
ENSG00000173467	AGR3	3.954011	124	3.055359	82	3.274004	87	8.746996	255	7.968135	202	10.622098	276	1.03E-08	-1.424767114	down	--	--	Cellular Component: endoplasmic reticulum (GO:0005783);; Cellular Component: intracellular membrane-bounded organelle (GO:0043231);;	K20357|1.0e-88|hsa:155465|K20357 anterior gradient protein 3 | (RefSeq) AGR3, AG-3, AG3, BCMP11, HAG3, PDIA18, hAG-3; anterior gradient 3, protein disulphide isomerase family member	--	--	--	Thioredoxin-like	Anterior gradient protein 3 OS=Homo sapiens OX=9606 GN=AGR3 PE=1 SV=1	S	Function unknown	anterior gradient protein 3 precursor [Homo sapiens]	cellular component: cell (GO:0005623);; cellular component: organelle (GO:0043226);; cellular component: cell part (GO:0044464)
ENSG00000149636	DSN1	2.316551	234	1.665847	138	1.793927	129	4.734076	433	5.29121	440	4.105314	347	8.06E-11	-1.420129914	down	--	--	Cellular Component: MIS12/MIND type complex (GO:0000444);; Biological Process: chromosome segregation (GO:0007059);; Biological Process: cell division (GO:0051301);;	K11544|6.0e-195|hsa:79980|K11544 kinetochore-associated protein DSN1 | (RefSeq) DSN1, C20orf172, KNL3, MIS13, dJ469A13.2, hKNL-3; DSN1 component of MIS12 kinetochore complex	--	--	--	Mis12-Mtw1 protein family	Kinetochore-associated protein DSN1 homolog OS=Homo sapiens OX=9606 GN=DSN1 PE=1 SV=2	S	Function unknown	kinetochore-associated protein DSN1 homolog isoform 1 [Homo sapiens]	cellular component: cell (GO:0005623);; cellular component: macromolecular complex (GO:0032991);; cellular component: organelle (GO:0043226);; cellular component: organelle part (GO:0044422);; cellular component: cell part (GO:0044464);; biological process: cellular process (GO:0009987);; biological process: single-organism process (GO:0044699)
ENSG00000228716	DHFR	9.950898	1807	13.7248	1892	10.453145	1433	28.574398	4491	29.274137	4212	25.695081	3780	3.32E-18	-1.417106816	down	[H]	Coenzyme transport and metabolism	Molecular Function: dihydrofolate reductase activity (GO:0004146);; Biological Process: tetrahydrofolate biosynthetic process (GO:0046654);;	K00287|2.0e-104|hsa:1719|K00287 dihydrofolate reductase [EC:1.5.1.3] | (RefSeq) DHFR, DHFRP1, DYR; dihydrofolate reductase	One carbon pool by folate (ko00670);; Folate biosynthesis (ko00790);; Antifolate resistance (ko01523)	[H]	Coenzyme transport and metabolism	Dihydrofolate reductase	Dihydrofolate reductase OS=Homo sapiens OX=9606 GN=DHFR PE=1 SV=2	H	Coenzyme transport and metabolism	dihydrofolate reductase isoform 1 [Homo sapiens]	biological process: metabolic process (GO:0008152);; biological process: single-organism process (GO:0044699);; molecular function: catalytic activity (GO:0003824);; biological process: cellular process (GO:0009987)
ENSG00000099901	RANBP1	44.816402	1946	36.982431	1245	42.642795	1390	89.407863	3333	109.567132	3631	115.400281	3954	6.92E-16	-1.413917523	down	--	--	Biological Process: G1/S transition of mitotic cell cycle (GO:0000082);; Biological Process: microtubule cytoskeleton organization (GO:0000226);; Biological Process: mitotic cell cycle (GO:0000278);; Biological Process: response to acid chemical (GO:0001101);; Molecular Function: molecular_function (GO:0003674);; Molecular Function: GDP-dissociation inhibitor activity (GO:0005092);; Molecular Fun…	K15306|2.4e-29|epz:103561790|K15306 Ran-binding protein 1 | (RefSeq) RANBP1; RAN binding protein 1	Human T-cell leukemia virus 1 infection (ko05166);; Viral carcinogenesis (ko05203)	--	--	--	--	U	Intracellular trafficking, secretion, and vesicular transport	RANBP1 isoform 2 [Pan troglodytes]	biological process: cellular process (GO:0009987);; biological process: single-organism process (GO:0044699);; biological process: cellular component organization or biogenesis (GO:0071840);; biological process: response to stimulus (GO:0050896);; biological process: biological regulation (GO:0065007);; molecular function: molecular function regulator (GO:0098772);; molecular function: binding (G…
ENSG00000105173	CCNE1	2.645016	229	2.876268	207	2.760783	179	5.652654	458	6.55784	476	7.646423	570	3.17E-11	-1.412947699	down	--	--	Biological Process: G1/S transition of mitotic cell cycle (GO:0000082);; Cellular Component: host cell nucleus (GO:0042025);; Biological Process: regulation of cell cycle (GO:0051726);;	K06626|2.1e-236|hsa:898|K06626 G1/S-specific cyclin-E1 | (RefSeq) CCNE1, CCNE, pCCNE1; cyclin E1	Cell cycle (ko04110);; Oocyte meiosis (ko04114);; p53 signaling pathway (ko04115);; PI3K-Akt signaling pathway (ko04151);; Cellular senescence (ko04218);; Cushing syndrome (ko04934);; Hepatitis B (ko05161);; Measles (ko05162);; Human papillomavirus infection (ko05165);; Human T-cell leukemia virus 1 infection (ko05166);; Epstein-Barr virus infection (ko05169);; Pathways in cancer (ko05200);; Vira…	[D]	Cell cycle control, cell division, chromosome partitioning	Cyclin, N-terminal domain	G1/S-specific cyclin-E1 OS=Homo sapiens OX=9606 GN=CCNE1 PE=1 SV=2	D	Cell cycle control, cell division, chromosome partitioning	G1/S-specific cyclin-E1 isoform 1 [Homo sapiens]	biological process: cellular process (GO:0009987);; biological process: single-organism process (GO:0044699);; cellular component: other organism (GO:0044215);; cellular component: other organism part (GO:0044217);; biological process: biological regulation (GO:0065007)
ENSG00000077942	FBLN1	5.539591	606	5.399462	468	5.15728	435	12.023244	1181	11.666137	1031	15.654025	1413	2.55E-13	-1.408501343	down	--	--	Molecular Function: integrin binding (GO:0005178);; Molecular Function: calcium ion binding (GO:0005509);; Cellular Component: extracellular region (GO:0005576);; Molecular Function: peptidase activator activity (GO:0016504);; Biological Process: extracellular matrix organization (GO:0030198);;	K17307|3.0e-238|hsa:2192|K17307 fibulin 1/2 | (RefSeq) FBLN1, FBLN, FIBL1; fibulin 1	--	[T]	Signal transduction mechanisms	Calcium-binding EGF domain	Fibulin-1 OS=Homo sapiens OX=9606 GN=FBLN1 PE=1 SV=4	T	Signal transduction mechanisms	fibulin-1 isoform D precursor [Homo sapiens]	molecular function: binding (GO:0005488);; cellular component: extracellular region (GO:0005576);; biological process: biological regulation (GO:0065007);; molecular function: molecular function regulator (GO:0098772);; biological process: cellular process (GO:0009987);; biological process: single-organism process (GO:0044699);; biological process: cellular component organization or biogenesis (G…
ENSG00000104738	MCM4	17.480158	3330	21.610626	3197	17.33724	2479	46.055491	7620	47.797216	7129	43.767132	6791	1.74E-21	-1.407793638	down	[L]	Replication, recombination and repair	Molecular Function: DNA binding (GO:0003677);; Molecular Function: DNA helicase activity (GO:0003678);; Molecular Function: ATP binding (GO:0005524);; Cellular Component: nucleus (GO:0005634);; Biological Process: DNA replication initiation (GO:0006270);; Cellular Component: MCM complex (GO:0042555);;	K02212|0.0e+00|hsa:4173|K02212 DNA replication licensing factor MCM4 [EC:3.6.4.12] | (RefSeq) MCM4, CDC21, CDC54, IMD54, NKCD, NKGCD, P1-CDC21, hCdc21; minichromosome maintenance complex component 4	DNA replication (ko03030);; Cell cycle (ko04110)	[L]	Replication, recombination and repair	MCM P-loop domain	DNA replication licensing factor MCM4 OS=Homo sapiens OX=9606 GN=MCM4 PE=1 SV=5	L	Replication, recombination and repair	DNA replication licensing factor MCM4 [Homo sapiens]	molecular function: binding (GO:0005488);; molecular function: catalytic activity (GO:0003824);; cellular component: cell (GO:0005623);; cellular component: organelle (GO:0043226);; cellular component: cell part (GO:0044464);; biological process: metabolic process (GO:0008152);; biological process: cellular process (GO:0009987);; cellular component: macromolecular complex (GO:0032991)
ENSG00000168453	HR	2.529306	749	1.953636	453	2.210255	490	5.06597	1309	5.426613	1195	6.686633	1526	4.14E-13	-1.407550491	down	--	--	Cellular Component: histone deacetylase complex (GO:0000118);; Cellular Component: chromatin (GO:0000785);; Molecular Function: transcription regulatory region sequence-specific DNA binding (GO:0000976);; Molecular Function: regulatory region nucleic acid binding (GO:0001067);; Molecular Function: molecular_function (GO:0003674);; Molecular Function: nucleic acid binding (GO:0003676);; Molecular …	K00478|0.0e+00|hsa:55806|K00478 [histone H3]-dimethyl-L-lysine9 demethylase [EC:1.14.11.65] | (RefSeq) HR, ALUNC, AU, HSA277165, HYPT4, MUHH, MUHH1; HR lysine demethylase and nuclear receptor corepressor	--	[K]	Transcription	JmjC domain, hydroxylase	Lysine-specific demethylase hairless OS=Homo sapiens OX=9606 GN=HR PE=1 SV=5	K	Transcription	lysine-specific demethylase hairless isoform a [Homo sapiens]	cellular component: cell (GO:0005623);; cellular component: membrane-enclosed lumen (GO:0031974);; cellular component: macromolecular complex (GO:0032991);; cellular component: organelle (GO:0043226);; cellular component: organelle part (GO:0044422);; cellular component: cell part (GO:0044464);; molecular function: binding (GO:0005488);; biological process: biological regulation (GO:0065007);; mo…
Homo_sapiens_newGene_10989	--	3.288766	429	2.429663	248	3.016689	294	6.944698	790	6.821226	704	7.711632	829	1.12E-12	-1.406314154	down	--	--	--	--	--	--	--	--	--	--	--	--	--
ENSG00000006042	TMEM98	0.217685	46	0.207423	34	0.343298	54	0.780246	121	0.815412	121	0.990734	113	6.86E-06	-1.405496665	down	--	--	Cellular Component: integral component of membrane (GO:0016021);;	K23879|6.5e-70|nni:104012326|K23879 progranulin | (RefSeq) TMEM98; LOW QUALITY PROTEIN: transmembrane protein 98	--	--	--	Grap2 and cyclin-D-interacting	Transmembrane protein 98 OS=Homo sapiens OX=9606 GN=TMEM98 PE=1 SV=1	S	Function unknown	transmembrane protein 98 [Homo sapiens]	cellular component: membrane (GO:0016020);; cellular component: membrane part (GO:0044425)
ENSG00000156970	BUB1B	4.371817	757	6.21045	819	5.009433	653	15.6283	2374	14.798595	2035	8.349483	1192	9.70E-10	-1.402520383	down	--	--	Biological Process: mitotic spindle assembly checkpoint (GO:0007094);;	K06637|0.0e+00|hsa:701|K06637 mitotic checkpoint serine/threonine-protein kinase BUB1 beta [EC:2.7.11.1] | (RefSeq) BUB1B, BUB1beta, BUBR1, Bub1A, MAD3L, MVA1, SSK1, hBUBR1; BUB1 mitotic checkpoint serine/threonine kinase B	Cell cycle (ko04110);; Human T-cell leukemia virus 1 infection (ko05166)	[D]	Cell cycle control, cell division, chromosome partitioning	Mad3/BUB1 homology region 1	Mitotic checkpoint serine/threonine-protein kinase BUB1 beta OS=Homo sapiens OX=9606 GN=BUB1B PE=1 SV=3	D	Cell cycle control, cell division, chromosome partitioning	mitotic checkpoint serine/threonine-protein kinase BUB1 beta [Homo sapiens]	biological process: cellular process (GO:0009987);; biological process: single-organism process (GO:0044699);; biological process: biological regulation (GO:0065007)
ENSG00000106268	NUDT1	16.957762	539	15.268504	400	15.688121	381	38.147358	1070	36.993894	927	43.414418	1141	1.72E-15	-1.40143717	down	--	--	Cellular Component: cytosol (GO:0005829);; Biological Process: DNA repair (GO:0006281);; Molecular Function: 8-oxo-7,8-dihydroguanosine triphosphate pyrophosphatase activity (GO:0008413);;	K17816|7.8e-13|cge:100770207|K17816 8-oxo-dGTP diphosphatase / 2-hydroxy-dATP diphosphatase [EC:3.6.1.55 3.6.1.56] | (RefSeq) Nudt1; 7,8-dihydro-8-oxoguanine triphosphatase isoform X3	--	--	--	--	7,8-dihydro-8-oxoguanine triphosphatase OS=Homo sapiens OX=9606 GN=NUDT1 PE=1 SV=3	L	Replication, recombination and repair	7,8-dihydro-8-oxoguanine triphosphatase isoform p22 [Homo sapiens]	cellular component: cell (GO:0005623);; cellular component: cell part (GO:0044464);; biological process: metabolic process (GO:0008152);; biological process: cellular process (GO:0009987);; biological process: response to stimulus (GO:0050896);; molecular function: catalytic activity (GO:0003824)
ENSG00000185697	MYBL1	0.603463	95	0.397203	76	0.240469	44	1.755069	279	1.32128	239	0.39385	79	0.000131557	-1.399537102	down	--	--	Molecular Function: DNA binding (GO:0003677);; Cellular Component: nucleus (GO:0005634);; Biological Process: regulation of transcription, DNA-templated (GO:0006355);;	K09421|0.0e+00|hsa:4603|K09421 myb-related protein A | (RefSeq) MYBL1, A-MYB, AMYB; MYB proto-oncogene like 1	--	--	--	C-myb, C-terminal	Myb-related protein A OS=Homo sapiens OX=9606 GN=MYBL1 PE=1 SV=2	K	Transcription	myb-related protein A isoform 1 [Homo sapiens]	molecular function: binding (GO:0005488);; cellular component: cell (GO:0005623);; cellular component: organelle (GO:0043226);; cellular component: cell part (GO:0044464);; biological process: biological regulation (GO:0065007)
ENSG00000101945	SUV39H1	3.531221	474	6.297246	661	4.152265	417	10.839297	1269	11.680859	1240	12.169074	1339	6.14E-10	-1.398964132	down	[R]	General function prediction only	Cellular Component: nucleus (GO:0005634);; Molecular Function: zinc ion binding (GO:0008270);; Molecular Function: histone-lysine N-methyltransferase activity (GO:0018024);;	K11419|1.5e-256|mcf:102134179|K11419 [histone H3]-lysine9 N-trimethyltransferase SUV39H [EC:2.1.1.355] | (RefSeq) SUV39H1; suppressor of variegation 3-9 homolog 1	Lysine degradation (ko00310)	[BK]	Chromatin structure and dynamics;; Transcription	SET domain	Histone-lysine N-methyltransferase SUV39H1 OS=Homo sapiens OX=9606 GN=SUV39H1 PE=1 SV=1	B	Chromatin structure and dynamics	histone-lysine N-methyltransferase SUV39H1 [Pongo abelii]	cellular component: cell (GO:0005623);; cellular component: organelle (GO:0043226);; cellular component: cell part (GO:0044464);; molecular function: binding (GO:0005488);; biological process: metabolic process (GO:0008152);; biological process: cellular process (GO:0009987);; biological process: cellular component organization or biogenesis (GO:0071840);; molecular function: catalytic activity (…
ENSG00000163923	RPL39L	12.830413	453	12.631455	349	15.333465	404	33.113104	958	33.422004	881	36.435054	1052	1.01E-13	-1.394496767	down	--	--	Biological Process: reproduction (GO:0000003);; Molecular Function: molecular_function (GO:0003674);; Molecular Function: nucleic acid binding (GO:0003676);; Molecular Function: RNA binding (GO:0003723);; Molecular Function: structural constituent of ribosome (GO:0003735);; Molecular Function: structural molecule activity (GO:0005198);; Molecular Function: binding (GO:0005488);; Cellular Componen…	K02924|1.6e-21|ggo:101143328|K02924 large subunit ribosomal protein L39e | (RefSeq) RPL39L; 60S ribosomal protein L39-like	Ribosome (ko03010)	[J]	Translation, ribosomal structure and biogenesis	Ribosomal L39 protein	60S ribosomal protein L39-like OS=Homo sapiens OX=9606 GN=RPL39L PE=1 SV=3	J	Translation, ribosomal structure and biogenesis	60S ribosomal protein L39-like [Homo sapiens]	biological process: reproduction (GO:0000003);; molecular function: binding (GO:0005488);; molecular function: structural molecule activity (GO:0005198);; cellular component: cell (GO:0005623);; cellular component: cell part (GO:0044464);; cellular component: macromolecular complex (GO:0032991);; cellular component: organelle (GO:0043226);; biological process: metabolic process (GO:0008152);; bio…
Homo_sapiens_newGene_11543	--	1.387943	32	0.56286	10	0.85835	15	2.134356	43	3.626219	65	2.96024	56	0.000782461	-1.391401422	down	[J]	Translation, ribosomal structure and biogenesis	Biological Process: ribosomal small subunit assembly (GO:0000028);; Molecular Function: structural constituent of ribosome (GO:0003735);; Molecular Function: laminin receptor activity (GO:0005055);; Cellular Component: nucleus (GO:0005634);; Cellular Component: plasma membrane (GO:0005886);; Biological Process: translation (GO:0006412);; Cellular Component: cytosolic small ribosomal subunit (GO:0…	K02998|7.8e-66|aju:106966658|K02998 small subunit ribosomal protein SAe | (RefSeq) RPSA; 40S ribosomal protein SA	Ribosome (ko03010)	[J]	Translation, ribosomal structure and biogenesis	Ribosomal protein S2	40S ribosomal protein SA OS=Homo sapiens OX=9606 GN=RPSA PE=1 SV=4	J	Translation, ribosomal structure and biogenesis	40S ribosomal protein SA-like [Macaca nemestrina]	biological process: cellular process (GO:0009987);; biological process: cellular component organization or biogenesis (GO:0071840);; molecular function: structural molecule activity (GO:0005198);; molecular function: molecular transducer activity (GO:0060089);; cellular component: cell (GO:0005623);; cellular component: organelle (GO:0043226);; cellular component: cell part (GO:0044464);; cellula…
ENSG00000122966	CIT	2.789764	1124	4.207712	1272	2.659918	750	8.772157	3082	7.820559	2469	6.402366	2104	2.37E-11	-1.390099072	down	[T]	Signal transduction mechanisms	Molecular Function: protein serine/threonine kinase activity (GO:0004674);; Molecular Function: ATP binding (GO:0005524);; Biological Process: intracellular signal transduction (GO:0035556);;	K16308|0.0e+00|ggo:101126596|K16308 citron Rho-interacting kinase [EC:2.7.11.1] | (RefSeq) CIT; citron Rho-interacting kinase isoform X1	--	[T]	Signal transduction mechanisms	CNH domain	Citron Rho-interacting kinase OS=Homo sapiens OX=9606 GN=CIT PE=1 SV=2	T	Signal transduction mechanisms	citron Rho-interacting kinase isoform 1 [Homo sapiens]	biological process: metabolic process (GO:0008152);; biological process: cellular process (GO:0009987);; molecular function: catalytic activity (GO:0003824);; molecular function: binding (GO:0005488);; biological process: signaling (GO:0023052);; biological process: single-organism process (GO:0044699);; biological process: response to stimulus (GO:0050896);; biological process: biological regula…
ENSG00000101447	FAM83D	3.36053	380	5.387327	474	3.36811	285	9.975574	982	9.685075	850	10.474267	950	2.68E-10	-1.38990786	down	--	--	Cellular Component: cytosol (GO:0005829);; Cellular Component: microtubule cytoskeleton (GO:0015630);; Cellular Component: intercellular bridge (GO:0045171);; Cellular Component: mitotic spindle (GO:0072686);;	K16805|0.0e+00|ggo:101129684|K16805 protein FAM83D | (RefSeq) FAM83D; protein FAM83D	--	--	--	FAM83 A-H	Protein FAM83D OS=Homo sapiens OX=9606 GN=FAM83D PE=1 SV=3	S	Function unknown	chromosome 20 open reading frame 129 [Homo sapiens]	cellular component: cell (GO:0005623);; cellular component: cell part (GO:0044464);; cellular component: organelle (GO:0043226);; cellular component: extracellular region (GO:0005576);; cellular component: extracellular region part (GO:0044421);; cellular component: organelle part (GO:0044422)
ENSG00000076382	SPAG5	10.55128	1942	11.47933	1651	10.685582	1497	29.678218	4820	27.51852	4050	21.300036	3232	1.63E-18	-1.388222734	down	--	--	Biological Process: cell division (GO:0051301);; Biological Process: regulation of attachment of spindle microtubules to kinetochore (GO:0051988);;	K21764|0.0e+00|hsa:10615|K21764 sperm-associated antigen 5 | (RefSeq) SPAG5, DEEPEST, MAP126, hMAP126; sperm associated antigen 5	--	--	--	--	Sperm-associated antigen 5 OS=Homo sapiens OX=9606 GN=SPAG5 PE=1 SV=2	Z	Cytoskeleton	sperm-associated antigen 5 [Homo sapiens]	biological process: cellular process (GO:0009987);; biological process: single-organism process (GO:0044699);; biological process: biological regulation (GO:0065007)
ENSG00000198830	HMGN2	137.217609	7596	127.437808	5522	141.453371	5870	301.426955	14590	314.331479	13784	353.327088	16077	2.91E-19	-1.387751677	down	--	--	Cellular Component: chromatin (GO:0000785);; Cellular Component: nucleus (GO:0005634);; Molecular Function: nucleosomal DNA binding (GO:0031492);;	K11300|3.5e-35|csab:103234925|K11300 high-mobility group nucleosome-binding domain-containing protein 2 | (RefSeq) non-histone chromosomal protein HMG-17	--	--	--	HMG14 and HMG17	Non-histone chromosomal protein HMG-17 OS=Homo sapiens OX=9606 GN=HMGN2 PE=1 SV=3	S	Function unknown	non-histone chromosomal protein HMG-17 [Homo sapiens]	cellular component: cell (GO:0005623);; cellular component: organelle (GO:0043226);; cellular component: organelle part (GO:0044422);; cellular component: cell part (GO:0044464);; molecular function: binding (GO:0005488)
ENSG00000186638	KIF24	0.965509	277	1.000943	225	0.730019	158	2.688415	657	2.228009	500	1.829975	430	1.05E-10	-1.386480214	down	--	--	Biological Process: microtubule cytoskeleton organization (GO:0000226);; Molecular Function: molecular_function (GO:0003674);; Molecular Function: motor activity (GO:0003774);; Molecular Function: microtubule motor activity (GO:0003777);; Molecular Function: catalytic activity (GO:0003824);; Molecular Function: binding (GO:0005488);; Molecular Function: protein binding (GO:0005515);; Molecular Fu…	K10393|0.0e+00|hsa:347240|K10393 kinesin family member 2/24 | (RefSeq) KIF24, C9orf48, bA571F15.4; kinesin family member 24	--	[Z]	Cytoskeleton	Kinesin motor domain	Kinesin-like protein KIF24 OS=Homo sapiens OX=9606 GN=KIF24 PE=1 SV=2	Z	Cytoskeleton	kinesin-like protein KIF24 [Homo sapiens]	biological process: cellular process (GO:0009987);; biological process: cellular component organization or biogenesis (GO:0071840);; molecular function: catalytic activity (GO:0003824);; molecular function: binding (GO:0005488);; cellular component: cell (GO:0005623);; cellular component: cell part (GO:0044464);; cellular component: organelle (GO:0043226);; cellular component: organelle part (GO:…
Homo_sapiens_newGene_458	--	1.516412	114	0.491756	38	0.316599	25	1.857566	158	1.394947	108	2.510351	199	0.000336471	-1.384169417	down	--	--	--	--	--	--	--	--	--	--	--	--	--
ENSG00000087586	AURKA	60.38741	5649	76.873282	5484	59.820098	4164	160.677608	13011	161.821693	12141	138.656546	10883	3.81E-20	-1.383464306	down	[T]	Signal transduction mechanisms	Biological Process: meiotic spindle organization (GO:0000212);; Molecular Function: protein serine/threonine kinase activity (GO:0004674);; Molecular Function: ATP binding (GO:0005524);; Biological Process: mitotic spindle organization (GO:0007052);; Biological Process: mitotic centrosome separation (GO:0007100);;	K11481|8.5e-230|hsa:6790|K11481 aurora kinase A [EC:2.7.11.1] | (RefSeq) AURKA, AIK, ARK1, AURA, BTAK, PPP1R47, STK15, STK6, STK7; aurora kinase A	Oocyte meiosis (ko04114);; Progesterone-mediated oocyte maturation (ko04914)	[D]	Cell cycle control, cell division, chromosome partitioning	Protein kinase domain	Aurora kinase A OS=Homo sapiens OX=9606 GN=AURKA PE=1 SV=2	D	Cell cycle control, cell division, chromosome partitioning	aurora kinase A [Homo sapiens]	biological process: reproduction (GO:0000003);; biological process: cellular process (GO:0009987);; biological process: reproductive process (GO:0022414);; biological process: single-organism process (GO:0044699);; biological process: cellular component organization or biogenesis (GO:0071840);; biological process: metabolic process (GO:0008152);; molecular function: catalytic activity (GO:0003824…
ENSG00000185361	TNFAIP8L1	0.583786	104	0.336076	48	0.51192	69	1.093912	171	1.122676	159	1.455551	213	3.22E-06	-1.372803137	down	--	--	Cellular Component: nucleoplasm (GO:0005654);; Biological Process: regulation of apoptotic process (GO:0042981);;	K12471|5.1e-36|nfu:107395398|K12471 epsin | (RefSeq) epn3; epsin-3	Endocytosis (ko04144)	--	--	Domain of unknown function (DUF758)	Tumor necrosis factor alpha-induced protein 8-like protein 1 OS=Homo sapiens OX=9606 GN=TNFAIP8L1 PE=1 SV=2	S	Function unknown	tumor necrosis factor alpha-induced protein 8-like protein 1 [Homo sapiens]	cellular component: cell (GO:0005623);; cellular component: organelle (GO:0043226);; cellular component: organelle part (GO:0044422);; cellular component: cell part (GO:0044464);; biological process: biological regulation (GO:0065007)
ENSG00000102007	PLP2	48.418544	2426	46.323411	1822	51.720311	1941	109.144913	4769	108.41989	4314	129.931785	5327	7.84E-17	-1.372710391	down	--	--	Cellular Component: integral component of membrane (GO:0016021);;	--	--	[V]	Defense mechanisms	Membrane-associating domain	Proteolipid protein 2 OS=Homo sapiens OX=9606 GN=PLP2 PE=1 SV=1	V	Defense mechanisms	proteolipid protein 2 [Homo sapiens]	cellular component: membrane (GO:0016020);; cellular component: membrane part (GO:0044425)
ENSG00000171320	ESCO2	0.513289	89	0.993893	137	0.518072	69	2.064787	331	2.293996	333	0.883238	133	6.33E-05	-1.370913773	down	--	--	Cellular Component: nuclear chromosome (GO:0000228);; Cellular Component: chromosome, centromeric region (GO:0000775);; Cellular Component: chromatin (GO:0000785);; Cellular Component: nuclear chromatin (GO:0000790);; Cellular Component: heterochromatin (GO:0000792);; Cellular Component: sex chromosome (GO:0000803);; Cellular Component: XY body (GO:0001741);; Biological Process: hematopoietic pro…	K11268|0.0e+00|hsa:157570|K11268 N-acetyltransferase [EC:2.3.1.-] | (RefSeq) ESCO2, 2410004I17Rik, EFO2, EFO2p, RBS, hEFO2; establishment of sister chromatid cohesion N-acetyltransferase 2	--	--	--	ESCO1/2 acetyl-transferase	N-acetyltransferase ESCO2 OS=Homo sapiens OX=9606 GN=ESCO2 PE=1 SV=1	L	Replication, recombination and repair	establishment of cohesion 1 homolog 2 (S. cerevisiae) [Homo sapiens]	cellular component: cell (GO:0005623);; cellular component: organelle (GO:0043226);; cellular component: organelle part (GO:0044422);; cellular component: cell part (GO:0044464);; cellular component: membrane-enclosed lumen (GO:0031974);; biological process: cellular process (GO:0009987);; biological process: developmental process (GO:0032502);; biological process: single-organism process (GO:004…
ENSG00000176974	SHMT1	14.660297	1414	14.700345	1194	13.380477	1004	30.353992	2689	31.764498	2506	39.675509	3149	5.11E-15	-1.361570418	down	[E]	Amino acid transport and metabolism	Molecular Function: glycine hydroxymethyltransferase activity (GO:0004372);; Molecular Function: methyltransferase activity (GO:0008168);; Biological Process: glycine biosynthetic process from serine (GO:0019264);; Molecular Function: pyridoxal phosphate binding (GO:0030170);; Biological Process: methylation (GO:0032259);; Biological Process: tetrahydrofolate interconversion (GO:0035999);;	K00600|1.6e-283|hsa:6470|K00600 glycine hydroxymethyltransferase [EC:2.1.2.1] | (RefSeq) SHMT1, CSHMT, SHMT; serine hydroxymethyltransferase 1	Glycine, serine and threonine metabolism (ko00260);; Glyoxylate and dicarboxylate metabolism (ko00630);; One carbon pool by folate (ko00670);; Carbon metabolism (ko01200);; Biosynthesis of amino acids (ko01230);; Antifolate resistance (ko01523)	[E]	Amino acid transport and metabolism	Serine hydroxymethyltransferase	Serine hydroxymethyltransferase, cytosolic OS=Homo sapiens OX=9606 GN=SHMT1 PE=1 SV=1	E	Amino acid transport and metabolism	serine hydroxymethyltransferase, cytosolic isoform 1 [Homo sapiens]	molecular function: catalytic activity (GO:0003824);; biological process: metabolic process (GO:0008152);; biological process: cellular process (GO:0009987);; biological process: single-organism process (GO:0044699);; molecular function: binding (GO:0005488)
ENSG00000130816	DNMT1	34.173729	8391	37.263225	7041	32.414193	6028	80.841901	17204	79.593984	15674	78.650034	16115	3.99E-25	-1.356353205	down	[L]	Replication, recombination and repair	Molecular Function: DNA binding (GO:0003677);; Molecular Function: chromatin binding (GO:0003682);; Molecular Function: DNA (cytosine-5-)-methyltransferase activity (GO:0003886);; Cellular Component: nucleus (GO:0005634);; Molecular Function: zinc ion binding (GO:0008270);;	K00558|0.0e+00|hsa:1786|K00558 DNA (cytosine-5)-methyltransferase 1 [EC:2.1.1.37] | (RefSeq) DNMT1, ADCADN, AIM, CXXC9, DNMT, HSN1E, MCMT, m.HsaI; DNA methyltransferase 1	Cysteine and methionine metabolism (ko00270);; MicroRNAs in cancer (ko05206)	--	--	Cytosine specific DNA methyltransferase replication foci domain	DNA (cytosine-5)-methyltransferase 1 OS=Homo sapiens OX=9606 GN=DNMT1 PE=1 SV=2	B	Chromatin structure and dynamics	DNA (cytosine-5)-methyltransferase 1 isoform b [Homo sapiens]	molecular function: binding (GO:0005488);; biological process: metabolic process (GO:0008152);; biological process: cellular process (GO:0009987);; molecular function: catalytic activity (GO:0003824);; cellular component: cell (GO:0005623);; cellular component: organelle (GO:0043226);; cellular component: cell part (GO:0044464)
ENSG00000141574	SECTM1	5.233663	485	4.332869	329	4.802686	345	10.156792	902	9.422612	744	14.100747	1030	1.41E-11	-1.351644324	down	--	--	Molecular Function: cytokine activity (GO:0005125);; Biological Process: immune response (GO:0006955);; Cellular Component: integral component of membrane (GO:0016021);;	K06457|1.4e-33|cdk:105102223|K06457 T-cell surface glycoprotein CD7 | (RefSeq) T-cell antigen CD7 isoform X8	Hematopoietic cell lineage (ko04640)	--	--	--	Secreted and transmembrane protein 1 OS=Homo sapiens OX=9606 GN=SECTM1 PE=1 SV=2	T	Signal transduction mechanisms	secreted and transmembrane protein 1 precursor [Homo sapiens]	molecular function: binding (GO:0005488);; biological process: immune system process (GO:0002376);; biological process: response to stimulus (GO:0050896);; cellular component: membrane (GO:0016020);; cellular component: membrane part (GO:0044425)
ENSG00000090382	LYZ	1.053346	76	0.514273	29	0.617172	33	2.024382	127	2.019917	115	1.722249	100	4.97E-05	-1.350703162	down	--	--	Molecular Function: lysozyme activity (GO:0003796);; Biological Process: metabolic process (GO:0008152);; Biological Process: cytolysis (GO:0019835);; Biological Process: defense response to bacterium (GO:0042742);;	K13915|1.7e-82|hsa:4069|K13915 lysozyme C [EC:3.2.1.17] | (RefSeq) LYZ, LYZF1, LZM; lysozyme	Salivary secretion (ko04970)	--	--	C-type lysozyme/alpha-lactalbumin family	Lysozyme C OS=Homo sapiens OX=9606 GN=LYZ PE=1 SV=1	G	Carbohydrate transport and metabolism	lysozyme C precursor [Homo sapiens]	molecular function: catalytic activity (GO:0003824);; biological process: metabolic process (GO:0008152);; biological process: cellular process (GO:0009987);; biological process: response to stimulus (GO:0050896);; biological process: multi-organism process (GO:0051704)
ENSG00000134574	DDB2	9.415905	717	9.931343	578	7.154076	420	15.920842	1168	19.832499	1232	22.53054	1536	7.14E-11	-1.348690929	down	--	--	Molecular Function: damaged DNA binding (GO:0003684);; Cellular Component: nucleoplasm (GO:0005654);; Biological Process: DNA repair (GO:0006281);; Cellular Component: cell junction (GO:0030054);; Cellular Component: Cul4-RING E3 ubiquitin ligase complex (GO:0080008);;	K10140|5.6e-256|hsa:1643|K10140 DNA damage-binding protein 2 | (RefSeq) DDB2, DDBB, UV-DDB2, XPE; damage specific DNA binding protein 2	Nucleotide excision repair (ko03420);; p53 signaling pathway (ko04115);; Ubiquitin mediated proteolysis (ko04120);; Hepatitis B (ko05161);; Epstein-Barr virus infection (ko05169);; Pathways in cancer (ko05200);; Transcriptional misregulation in cancer (ko05202);; Colorectal cancer (ko05210);; Pancreatic cancer (ko05212);; Endometrial cancer (ko05213);; Glioma (ko05214);; Thyroid cancer (ko05216);…	[S]	Function unknown	WD domain, G-beta repeat	DNA damage-binding protein 2 OS=Homo sapiens OX=9606 GN=DDB2 PE=1 SV=1	S	Function unknown	DNA damage-binding protein 2 isoform WT [Homo sapiens]	molecular function: binding (GO:0005488);; cellular component: cell (GO:0005623);; cellular component: organelle (GO:0043226);; cellular component: organelle part (GO:0044422);; cellular component: cell part (GO:0044464);; biological process: metabolic process (GO:0008152);; biological process: cellular process (GO:0009987);; biological process: response to stimulus (GO:0050896);; cellular compon…
ENSG00000100749	VRK1	3.466908	277	3.710557	224	3.729549	220	9.037728	636	9.0429	574	7.005304	467	2.72E-13	-1.348077025	down	[T]	Signal transduction mechanisms	Molecular Function: protein serine/threonine kinase activity (GO:0004674);; Molecular Function: ATP binding (GO:0005524);;	K08816|7.6e-231|hsa:7443|K08816 vaccinia related kinase [EC:2.7.11.1] | (RefSeq) VRK1, PCH1, PCH1A; VRK serine/threonine kinase 1	--	[T]	Signal transduction mechanisms	Protein kinase domain	Serine/threonine-protein kinase VRK1 OS=Homo sapiens OX=9606 GN=VRK1 PE=1 SV=1	T	Signal transduction mechanisms	serine/threonine-protein kinase VRK1 isoform X4 [Homo sapiens]	biological process: metabolic process (GO:0008152);; biological process: cellular process (GO:0009987);; molecular function: catalytic activity (GO:0003824);; molecular function: binding (GO:0005488)
ENSG00000105290	APLP1	2.060779	233	1.803736	156	2.286892	197	4.51064	431	4.337443	381	6.680603	570	3.14E-08	-1.346431595	down	--	--	Molecular Function: heparin binding (GO:0008201);; Cellular Component: integral component of membrane (GO:0016021);; Molecular Function: transition metal ion binding (GO:0046914);;	K05639|0.0e+00|hsa:333|K05639 amyloid-like protein 1 | (RefSeq) APLP1, APLP; amyloid beta precursor like protein 1	--	[R]	General function prediction only	E2 domain of amyloid precursor protein	Amyloid-like protein 1 OS=Homo sapiens OX=9606 GN=APLP1 PE=1 SV=3	S	Function unknown	amyloid-like protein 1 isoform 1 precursor [Homo sapiens]	molecular function: binding (GO:0005488);; cellular component: membrane (GO:0016020);; cellular component: membrane part (GO:0044425)
ENSG00000106399	RPA3	4.759181	439	4.512799	322	5.08496	360	9.173806	750	11.195335	836	13.031158	1006	9.81E-11	-1.344579017	down	--	--	Molecular Function: DNA binding (GO:0003677);; Cellular Component: nucleus (GO:0005634);; Biological Process: DNA replication (GO:0006260);; Biological Process: DNA repair (GO:0006281);; Biological Process: DNA recombination (GO:0006310);; Biological Process: regulation of mitotic cell cycle (GO:0007346);; Biological Process: regulation of cell proliferation (GO:0042127);;	K10740|1.7e-64|hsa:6119|K10740 replication factor A3 | (RefSeq) RPA3, REPA3, RP-A_p14; replication protein A3	DNA replication (ko03030);; Nucleotide excision repair (ko03420);; Mismatch repair (ko03430);; Homologous recombination (ko03440);; Fanconi anemia pathway (ko03460)	--	--	Replication factor A protein 3	Replication protein A 14 kDa subunit OS=Homo sapiens OX=9606 GN=RPA3 PE=1 SV=1	L	Replication, recombination and repair	replication protein A 14 kDa subunit [Homo sapiens]	molecular function: binding (GO:0005488);; cellular component: cell (GO:0005623);; cellular component: organelle (GO:0043226);; cellular component: cell part (GO:0044464);; biological process: metabolic process (GO:0008152);; biological process: cellular process (GO:0009987);; biological process: response to stimulus (GO:0050896);; biological process: biological regulation (GO:0065007)
ENSG00000137309	HMGA1	40.367268	3623	38.586662	2686	37.856084	2536	82.752074	6548	81.611218	5781	107.084547	7758	1.61E-14	-1.342635227	down	--	--	Cellular Component: chromatin (GO:0000785);; Molecular Function: DNA binding (GO:0003677);; Cellular Component: nucleus (GO:0005634);; Biological Process: regulation of transcription, DNA-templated (GO:0006355);;	K09282|1.4e-46|aju:106976095|K09282 high mobility group AT-hook protein 1 | (RefSeq) HMGA1; high mobility group protein HMG-I/HMG-Y isoform X1	--	--	--	--	High mobility group protein HMG-I/HMG-Y OS=Homo sapiens OX=9606 GN=HMGA1 PE=1 SV=3	K	Transcription	PREDICTED: high mobility group protein HMG-I/HMG-Y isoform X1 [Propithecus coquereli]	cellular component: cell (GO:0005623);; cellular component: organelle (GO:0043226);; cellular component: organelle part (GO:0044422);; cellular component: cell part (GO:0044464);; molecular function: binding (GO:0005488);; biological process: biological regulation (GO:0065007)
ENSG00000164649	CDCA7L	10.136913	1185	9.92785	924	9.921609	907	24.540517	2600	24.215844	2313	18.459482	1956	4.64E-20	-1.339634073	down	--	--	Cellular Component: fibrillar center (GO:0001650);; Cellular Component: nucleoplasm (GO:0005654);; Cellular Component: nucleolus (GO:0005730);; Cellular Component: cytosol (GO:0005829);; Biological Process: regulation of transcription, DNA-templated (GO:0006355);; Biological Process: positive regulation of cell proliferation (GO:0008284);; Biological Process: cell division (GO:0051301);;	K23408|4.8e-189|cge:100770155|K23408 cell division cycle-associated protein 7 | (RefSeq) Cdca7l; cell division cycle-associated 7-like protein isoform X1	--	--	--	Zinc-finger domain of monoamine-oxidase A repressor R1	Cell division cycle-associated 7-like protein OS=Homo sapiens OX=9606 GN=CDCA7L PE=1 SV=2	K	Transcription	cell division cycle-associated 7-like protein isoform 1 [Homo sapiens]	cellular component: cell (GO:0005623);; cellular component: membrane-enclosed lumen (GO:0031974);; cellular component: organelle (GO:0043226);; cellular component: organelle part (GO:0044422);; cellular component: cell part (GO:0044464);; biological process: biological regulation (GO:0065007);; biological process: cellular process (GO:0009987);; biological process: single-organism process (GO:004…
ENSG00000198189	HSD17B11	0.330931	30	0.12907	9	0.471629	32	0.655007	51	1.326782	93	0.85585	62	0.00153124	-1.339365971	down	[R]	General function prediction only	Cellular Component: lipid droplet (GO:0005811);;	K15734|7.1e-72|salp:111979024|K15734 all-trans-retinol dehydrogenase (NAD+) [EC:1.1.1.105] | (RefSeq) epidermal retinol dehydrogenase 2 isoform X1	Retinol metabolism (ko00830)	[Q]	Secondary metabolites biosynthesis, transport and catabolism	short chain dehydrogenase	Estradiol 17-beta-dehydrogenase 11 OS=Homo sapiens OX=9606 GN=HSD17B11 PE=1 SV=3	Q	Secondary metabolites biosynthesis, transport and catabolism	estradiol 17-beta-dehydrogenase 11 precursor [Homo sapiens]	cellular component: cell (GO:0005623);; cellular component: organelle (GO:0043226);; cellular component: cell part (GO:0044464)
ENSG00000215784	FAM72D	0.620879	70	0.877274	77	0.389499	33	2.253645	221	1.599311	142	1.090213	101	9.60E-05	-1.336174246	down	--	--	Cellular Component: cellular_component (GO:0005575);; Cellular Component: intracellular (GO:0005622);; Cellular Component: cell (GO:0005623);; Cellular Component: cytoplasm (GO:0005737);; Cellular Component: cytosol (GO:0005829);; Cellular Component: organelle (GO:0043226);; Cellular Component: membrane-bounded organelle (GO:0043227);; Cellular Component: intracellular organelle (GO:0043229);; Ce…	--	--	--	--	FAM72 protein	Protein FAM72D OS=Homo sapiens OX=9606 GN=FAM72D PE=1 SV=1	S	Function unknown	protein FAM72D isoform 1 [Homo sapiens]	cellular component: cell (GO:0005623);; cellular component: cell part (GO:0044464);; cellular component: organelle (GO:0043226)
ENSG00000183684	ALYREF	63.252647	3213	54.032875	2148	61.035618	2323	124.103531	5505	126.037819	5069	163.576096	6820	5.10E-13	-1.335780593	down	[J]	Translation, ribosomal structure and biogenesis	Molecular Function: RNA binding (GO:0003723);; Cellular Component: nuclear speck (GO:0016607);;	K12881|1.2e-123|hsa:10189|K12881 THO complex subunit 4 | (RefSeq) ALYREF, ALY, ALY/REF, BEF, REF, THOC4; Aly/REF export factor	RNA transport (ko03013);; mRNA surveillance pathway (ko03015);; Spliceosome (ko03040);; Amyotrophic lateral sclerosis (ko05014);; Herpes simplex virus 1 infection (ko05168)	[A]	RNA processing and modification	RNA recognition motif. (a.k.a. RRM, RBD, or RNP domain)	THO complex subunit 4 OS=Homo sapiens OX=9606 GN=ALYREF PE=1 SV=3	A	RNA processing and modification	THO complex subunit 4 [Homo sapiens]	molecular function: binding (GO:0005488);; cellular component: cell (GO:0005623);; cellular component: membrane-enclosed lumen (GO:0031974);; cellular component: organelle (GO:0043226);; cellular component: organelle part (GO:0044422);; cellular component: cell part (GO:0044464)
ENSG00000112312	GMNN	9.708172	544	9.181418	398	9.40484	397	25.515192	1244	25.787265	1121	15.954769	734	2.61E-11	-1.333713284	down	--	--	Molecular Function: transcription corepressor activity (GO:0003714);; Cellular Component: nucleoplasm (GO:0005654);; Cellular Component: cytosol (GO:0005829);; Biological Process: negative regulation of DNA replication (GO:0008156);; Biological Process: animal organ morphogenesis (GO:0009887);; Biological Process: negative regulation of cell cycle (GO:0045786);; Biological Process: negative regul…	K10749|2.4e-87|hsa:51053|K10749 geminin | (RefSeq) GMNN, Gem, MGORS6; geminin DNA replication inhibitor	--	--	--	Geminin	Geminin OS=Homo sapiens OX=9606 GN=GMNN PE=1 SV=1	K	Transcription	geminin [Homo sapiens]	biological process: biological regulation (GO:0065007);; molecular function: transcription factor activity, protein binding (GO:0000988);; cellular component: cell (GO:0005623);; cellular component: organelle (GO:0043226);; cellular component: organelle part (GO:0044422);; cellular component: cell part (GO:0044464);; biological process: developmental process (GO:0032502);; biological process: sin…
ENSG00000189057	FAM111B	1.150961	188	1.85456	236	0.602985	74	6.908628	954	5.908659	754	1.30048	174	0.006037173	-1.330743707	down	--	--	--	K24275|0.0e+00|hsa:374393|K24275 protein FAM111B | (RefSeq) FAM111B, CANP, POIKTMP; family with sequence similarity 111 member B	--	--	--	Trypsin-like peptidase domain	Protein FAM111B OS=Homo sapiens OX=9606 GN=FAM111B PE=1 SV=1	S	Function unknown	protein FAM111B isoform a [Homo sapiens]	--
Homo_sapiens_newGene_4961	--	0.202562	46	0.276079	48	0.244714	41	0.537122	105	0.520377	92	0.759362	139	3.67E-05	-1.3277921	down	--	--	Molecular Function: magnesium ion binding (GO:0000287);; Molecular Function: ATP binding (GO:0005524);; Biological Process: phospholipid transport (GO:0015914);; Cellular Component: integral component of membrane (GO:0016021);;	--	--	--	--	--	Putative uncharacterized protein encoded by LINC00596 OS=Homo sapiens OX=9606 GN=LINC00596 PE=5 SV=1	--	--	unnamed protein product [Homo sapiens]	molecular function: binding (GO:0005488);; biological process: single-organism process (GO:0044699);; biological process: localization (GO:0051179);; cellular component: membrane (GO:0016020);; cellular component: membrane part (GO:0044425)
ENSG00000213397	HAUS7	4.226914	266	3.144196	158	2.54449	123	7.689834	423	8.560515	426	7.794422	391	6.10E-09	-1.327432843	down	--	--	Biological Process: G2/M transition of mitotic cell cycle (GO:0000086);; Biological Process: microtubule cytoskeleton organization (GO:0000226);; Biological Process: mitotic cell cycle (GO:0000278);; Molecular Function: molecular_function (GO:0003674);; Molecular Function: binding (GO:0005488);; Molecular Function: protein binding (GO:0005515);; Cellular Component: cellular_component (GO:0005575)…	K16590|7.4e-63|hsa:55559|K16590 HAUS augmin-like complex subunit 7 | (RefSeq) HAUS7, UCHL5IP, UIP1; HAUS augmin like complex subunit 7	--	--	--	--	HAUS augmin-like complex subunit 7 OS=Homo sapiens OX=9606 GN=HAUS7 PE=1 SV=3	Z	Cytoskeleton	HAUS7 isoform 10 [Pan troglodytes]	biological process: cellular process (GO:0009987);; biological process: single-organism process (GO:0044699);; biological process: cellular component organization or biogenesis (GO:0071840);; molecular function: binding (GO:0005488);; cellular component: cell (GO:0005623);; cellular component: cell part (GO:0044464);; cellular component: organelle (GO:0043226);; cellular component: organelle part…
ENSG00000125454	SLC25A19	5.30168	367	4.849078	276	4.765475	246	11.695413	682	10.934422	620	12.0659	702	1.64E-13	-1.32630546	down	--	--	Molecular Function: ATP transmembrane transporter activity (GO:0005347);; Cellular Component: integral component of membrane (GO:0016021);;	K15108|3.0e-185|hsa:60386|K15108 solute carrier family 25 (mitochondrial thiamine pyrophosphate transporter), member 19 | (RefSeq) SLC25A19, DNC, MCPHA, MUP1, THMD3, THMD4, TPC; solute carrier family 25 member 19	--	[C]	Energy production and conversion	Mitochondrial carrier protein	Mitochondrial thiamine pyrophosphate carrier OS=Homo sapiens OX=9606 GN=SLC25A19 PE=1 SV=1	C	Energy production and conversion	mitochondrial thiamine pyrophosphate carrier [Homo sapiens]	biological process: single-organism process (GO:0044699);; biological process: localization (GO:0051179);; molecular function: transporter activity (GO:0005215);; cellular component: membrane (GO:0016020);; cellular component: membrane part (GO:0044425)
ENSG00000259399	TGIF2-RAB5IF	0.319989	14	0.228727	8	1.272525	41	1.160842	44	1.81581	62	3.038125	107	0.004475535	-1.319980286	down	--	--	Molecular Function: DNA binding (GO:0003677);; Cellular Component: nucleus (GO:0005634);; Biological Process: regulation of transcription, DNA-templated (GO:0006355);; Cellular Component: integral component of membrane (GO:0016021);;	K19553|1.5e-28|aju:106979294|K19553 homeobox protein TGIF2 | (RefSeq) TGIF2; homeobox protein TGIF2	TGF-beta signaling pathway (ko04350)	[U]	Intracellular trafficking, secretion, and vesicular transport	Rab5-interacting protein (Rab5ip)	Respirasome Complex Assembly Factor 1 OS=Homo sapiens OX=9606 GN=RAB5IF PE=1 SV=1	U	Intracellular trafficking, secretion, and vesicular transport	TGIF2-C20orf24 protein [Homo sapiens]	molecular function: binding (GO:0005488);; cellular component: cell (GO:0005623);; cellular component: organelle (GO:0043226);; cellular component: cell part (GO:0044464);; biological process: biological regulation (GO:0065007);; cellular component: membrane (GO:0016020);; cellular component: membrane part (GO:0044425)
ENSG00000170893	TRH	0.690243	64	0.411451	30	0.47981	34	1.305981	106	1.483175	109	1.2228	93	3.94E-05	-1.316851866	down	--	--	Cellular Component: extracellular region (GO:0005576);; Molecular Function: thyrotropin-releasing hormone activity (GO:0008437);; Biological Process: hormone-mediated signaling pathway (GO:0009755);;	K05253|4.2e-99|hsa:7200|K05253 thyrotropin-releasing hormone | (RefSeq) TRH, Pro-TRH, TRF; thyrotropin releasing hormone	Neuroactive ligand-receptor interaction (ko04080)	--	--	Thyrotropin-releasing hormone (TRH)	Pro-thyrotropin-releasing hormone OS=Homo sapiens OX=9606 GN=TRH PE=1 SV=1	O	Posttranslational modification, protein turnover, chaperones	thyrotropin releasing hormone preproprotein [Homo sapiens]	cellular component: extracellular region (GO:0005576);; molecular function: binding (GO:0005488);; biological process: cellular process (GO:0009987);; biological process: signaling (GO:0023052);; biological process: single-organism process (GO:0044699);; biological process: response to stimulus (GO:0050896);; biological process: biological regulation (GO:0065007)
ENSG00000149929	HIRIP3	8.571996	1159	8.878438	906	8.526318	815	19.440925	2186	19.880575	1992	21.682563	2200	1.63E-18	-1.311675051	down	--	--	Cellular Component: cellular_component (GO:0005575);; Cellular Component: intracellular (GO:0005622);; Cellular Component: cell (GO:0005623);; Cellular Component: nucleus (GO:0005634);; Cellular Component: nucleolus (GO:0005730);; Biological Process: chromatin organization (GO:0006325);; Biological Process: chromatin assembly or disassembly (GO:0006333);; Biological Process: organelle organizatio…	--	--	--	--	Histone chaperone domain CHZ	HIRA-interacting protein 3 OS=Homo sapiens OX=9606 GN=HIRIP3 PE=1 SV=3	S	Function unknown	HIRA-interacting protein 3 isoform 1 [Homo sapiens]	cellular component: cell (GO:0005623);; cellular component: cell part (GO:0044464);; cellular component: organelle (GO:0043226);; cellular component: organelle part (GO:0044422);; biological process: cellular process (GO:0009987);; biological process: cellular component organization or biogenesis (GO:0071840);; cellular component: membrane-enclosed lumen (GO:0031974)
ENSG00000198797	BRINP2	8.588558	1427	4.615497	600	5.896024	734	14.667742	2128	14.751306	1940	14.837781	2023	4.54E-09	-1.304138383	down	--	--	Biological Process: positive regulation of neuron differentiation (GO:0045666);; Biological Process: negative regulation of mitotic cell cycle (GO:0045930);;	--	--	--	--	BMP/retinoic acid-inducible neural-specific protein	BMP/retinoic acid-inducible neural-specific protein 2 OS=Homo sapiens OX=9606 GN=BRINP2 PE=2 SV=2	T	Signal transduction mechanisms	BMP/retinoic acid-inducible neural-specific protein 2 precursor [Homo sapiens]	biological process: cellular process (GO:0009987);; biological process: multicellular organismal process (GO:0032501);; biological process: developmental process (GO:0032502);; biological process: single-organism process (GO:0044699);; biological process: biological regulation (GO:0065007)
ENSG00000196230	TUBB	336.513254	41959	286.406217	27951	324.267916	30280	669.40766	72866	685.920136	67713	773.922303	79163	9.84E-17	-1.301369772	down	[D]	Cell cycle control, cell division, chromosome partitioning	Molecular Function: GTPase activity (GO:0003924);; Molecular Function: structural constituent of cytoskeleton (GO:0005200);; Molecular Function: GTP binding (GO:0005525);; Cellular Component: microtubule (GO:0005874);; Biological Process: microtubule-based process (GO:0007017);;	K07375|3.9e-249|acs:100563630|K07375 tubulin beta | (RefSeq) tubb; tubulin beta-7 chain	Phagosome (ko04145);; Gap junction (ko04540)	[Z]	Cytoskeleton	Tubulin/FtsZ family, GTPase domain	Tubulin beta chain OS=Homo sapiens OX=9606 GN=TUBB PE=1 SV=2	Z	Cytoskeleton	TUBB isoform 3 [Pan troglodytes]	molecular function: catalytic activity (GO:0003824);; molecular function: structural molecule activity (GO:0005198);; molecular function: binding (GO:0005488);; cellular component: cell (GO:0005623);; cellular component: organelle (GO:0043226);; cellular component: organelle part (GO:0044422);; cellular component: cell part (GO:0044464);; cellular component: supramolecular complex (GO:0099080);; …
Homo_sapiens_newGene_6573	--	0.267836	51	0.211148	32	0.422729	61	0.62234	104	0.705724	108	1.016021	147	0.000140056	-1.301288705	down	--	--	--	K12581|6.8e-18|nle:100584332|K12581 CCR4-NOT transcription complex subunit 7/8 | (RefSeq) CNOT8; CCR4-NOT transcription complex subunit 8 isoform X1	RNA degradation (ko03018)	--	--	--	UPF0764 protein C16orf89 OS=Homo sapiens OX=9606 GN=C16orf89 PE=1 SV=2	--	--	LOW QUALITY PROTEIN: protein GVQW1-like, partial [Hylobates moloch]	--
ENSG00000167552	TUBA1A	8.66345	721	6.663451	411	8.849786	556	18.707864	1333	16.725714	1061	20.466096	1372	2.05E-10	-1.298610724	down	--	--	Molecular Function: GTPase activity (GO:0003924);; Molecular Function: structural constituent of cytoskeleton (GO:0005200);; Molecular Function: GTP binding (GO:0005525);; Cellular Component: cytoplasm (GO:0005737);; Cellular Component: microtubule (GO:0005874);; Biological Process: microtubule-based process (GO:0007017);;	K07374|2.2e-266|acs:100562235|K07374 tubulin alpha | (RefSeq) tubulin alpha-1A chain	Phagosome (ko04145);; Apoptosis (ko04210);; Tight junction (ko04530);; Gap junction (ko04540)	[Z]	Cytoskeleton	Tubulin/FtsZ family, GTPase domain	Tubulin alpha-1A chain OS=Homo sapiens OX=9606 GN=TUBA1A PE=1 SV=1	Z	Cytoskeleton	tubulin alpha-1A chain [Pan troglodytes]	molecular function: catalytic activity (GO:0003824);; molecular function: structural molecule activity (GO:0005198);; molecular function: binding (GO:0005488);; cellular component: cell (GO:0005623);; cellular component: cell part (GO:0044464);; cellular component: organelle (GO:0043226);; cellular component: organelle part (GO:0044422);; cellular component: supramolecular complex (GO:0099080);; …
ENSG00000177917	ARL6IP6	4.866189	632	4.587958	464	5.570884	533	10.890138	1239	12.651683	1312	9.829621	1053	3.89E-14	-1.289130805	down	--	--	Cellular Component: integral component of membrane (GO:0016021);;	--	--	--	--	Haemopoietic lineage transmembrane helix	ADP-ribosylation factor-like protein 6-interacting protein 6 OS=Homo sapiens OX=9606 GN=ARL6IP6 PE=1 SV=1	S	Function unknown	ADP-ribosylation factor-like protein 6-interacting protein 6 isoform a [Homo sapiens]	cellular component: membrane (GO:0016020);; cellular component: membrane part (GO:0044425)
ENSG00000170515	PA2G4	39.931786	4765	35.026471	3282	36.246894	3245	75.21718	7880	78.558467	7473	91.914807	9059	6.11E-15	-1.281870846	down	[J]	Translation, ribosomal structure and biogenesis	Cellular Component: cytoplasm (GO:0005737);;	K14813|6.8e-99|smm:Smp_150690.1|K14813 metalloprotease ARX1 [EC:3.-.-.-] | (RefSeq) proliferation-associated protein 2G4, 38kDa (M24 family)	--	[R]	General function prediction only	Metallopeptidase family M24	Proliferation-associated protein 2G4 OS=Homo sapiens OX=9606 GN=PA2G4 PE=1 SV=3	K	Transcription	proliferation-associated protein 2G4 [Pan troglodytes]	cellular component: cell (GO:0005623);; cellular component: cell part (GO:0044464)
ENSG00000197472	ZNF695	4.007162	293	3.516849	216	2.17505	118	10.875906	562	10.353951	456	8.317117	383	4.41E-07	-1.278632285	down	--	--	Molecular Function: nucleic acid binding (GO:0003676);; Biological Process: regulation of transcription, DNA-templated (GO:0006355);; Molecular Function: metal ion binding (GO:0046872);;	K09228|1.1e-99|pps:103785522|K09228 KRAB domain-containing zinc finger protein | (RefSeq) ZNF695; zinc finger protein 695	Herpes simplex virus 1 infection (ko05168)	[R]	General function prediction only	Zinc-finger double domain	Zinc finger protein 695 OS=Homo sapiens OX=9606 GN=ZNF695 PE=1 SV=4	K	Transcription	zinc finger protein 695 isoform 1 [Homo sapiens]	molecular function: binding (GO:0005488);; biological process: biological regulation (GO:0065007)
ENSG00000013573	DDX11	5.157743	783	5.149254	619	5.514	606	12.696292	1595	11.081145	1285	12.46625	1489	8.16E-16	-1.274765074	down	--	--	Molecular Function: DNA binding (GO:0003677);; Molecular Function: DNA helicase activity (GO:0003678);; Molecular Function: ATP binding (GO:0005524);;	K11273|1.1e-98|hsa:1663|K11273 chromosome transmission fidelity protein 1 [EC:3.6.4.13] | (RefSeq) DDX11, CHL1, CHLR1, KRG2, WABS; DEAD/H-box helicase 11	--	[L]	Replication, recombination and repair	--	ATP-dependent DNA helicase DDX11 OS=Homo sapiens OX=9606 GN=DDX11 PE=1 SV=1	L	Replication, recombination and repair	CHL1 protein [Homo sapiens]	molecular function: binding (GO:0005488);; molecular function: catalytic activity (GO:0003824)
ENSG00000111331	OAS3	0.897922	226	0.856501	194	1.154405	235	2.080043	485	2.305647	484	2.09831	497	1.21E-09	-1.274609853	down	--	--	Molecular Function: 2'-5'-oligoadenylate synthetase activity (GO:0001730);; Molecular Function: double-stranded RNA binding (GO:0003725);; Biological Process: defense response to virus (GO:0051607);;	K14216|0.0e+00|hsa:4940|K14216 2'-5'-oligoadenylate synthetase [EC:2.7.7.84] | (RefSeq) OAS3, p100, p100OAS; 2'-5'-oligoadenylate synthetase 3	NOD-like receptor signaling pathway (ko04621);; Hepatitis C (ko05160);; Measles (ko05162);; Influenza A (ko05164);; Herpes simplex virus 1 infection (ko05168);; Epstein-Barr virus infection (ko05169)	--	--	2'-5'-oligoadenylate synthetase 1, domain 2, C-terminus	2'-5'-oligoadenylate synthase 3 OS=Homo sapiens OX=9606 GN=OAS3 PE=1 SV=3	L	Replication, recombination and repair	2'-5'-oligoadenylate synthase 3 [Homo sapiens]	molecular function: catalytic activity (GO:0003824);; molecular function: binding (GO:0005488);; biological process: immune system process (GO:0002376);; biological process: response to stimulus (GO:0050896);; biological process: multi-organism process (GO:0051704)
ENSG00000178882	RFLNA	0.209433	18	0.086	8	0.229681	20	0.462687	45	0.615415	37	0.522872	46	0.002778139	-1.273357894	down	--	--	Molecular Function: filamin binding (GO:0031005);; Biological Process: regulation of chondrocyte development (GO:0061181);; Biological Process: actin filament bundle organization (GO:0061572);;	--	--	--	--	FAM101 family	Refilin-A OS=Homo sapiens OX=9606 GN=RFLNA PE=1 SV=3	S	Function unknown	refilin-A [Homo sapiens]	molecular function: binding (GO:0005488);; biological process: biological regulation (GO:0065007);; biological process: cellular process (GO:0009987);; biological process: single-organism process (GO:0044699);; biological process: cellular component organization or biogenesis (GO:0071840)
ENSG00000128944	KNSTRN	8.990577	674	9.170325	557	8.449219	490	19.88687	1341	21.02307	1254	18.58383	1135	1.42E-17	-1.273012143	down	--	--	Cellular Component: kinetochore (GO:0000776);; Cellular Component: plasma membrane (GO:0005886);; Biological Process: spindle organization (GO:0007051);; Biological Process: chromosome segregation (GO:0007059);; Cellular Component: centriolar satellite (GO:0034451);; Biological Process: regulation of attachment of spindle microtubules to kinetochore (GO:0051988);; Cellular Component: mitotic spin…	--	--	--	--	--	Small kinetochore-associated protein OS=Homo sapiens OX=9606 GN=KNSTRN PE=1 SV=2	S	Function unknown	small kinetochore-associated protein isoform b [Homo sapiens]	cellular component: cell (GO:0005623);; cellular component: macromolecular complex (GO:0032991);; cellular component: organelle (GO:0043226);; cellular component: organelle part (GO:0044422);; cellular component: cell part (GO:0044464);; cellular component: membrane (GO:0016020);; biological process: cellular process (GO:0009987);; biological process: single-organism process (GO:0044699);; biolog…
ENSG00000111666	CHPT1	6.8327	610	5.752182	406	7.878263	503	13.87469	997	15.965109	1096	17.385626	1228	1.26E-10	-1.272736567	down	--	--	--	--	--	--	--	--	--	--	--	--	--
ENSG00000053918	KCNQ1	0.193871	30	0.191347	23	0.163953	19	0.374806	50	0.53053	64	0.507565	64	0.0005775	-1.271401999	down	[T]	Signal transduction mechanisms	Molecular Function: voltage-gated potassium channel activity (GO:0005249);; Cellular Component: voltage-gated potassium channel complex (GO:0008076);;	K04926|0.0e+00|hsa:3784|K04926 potassium voltage-gated channel KQT-like subfamily member 1 | (RefSeq) KCNQ1, ATFB1, ATFB3, JLNS1, KCNA8, KCNA9, KVLQT1, Kv1.9, Kv7.1, LQT, LQT1, RWS, SQT2, WRS; potassium voltage-gated channel subfamily Q member 1	Adrenergic signaling in cardiomyocytes (ko04261);; Cholinergic synapse (ko04725);; Gastric acid secretion (ko04971);; Pancreatic secretion (ko04972);; Protein digestion and absorption (ko04974);; Vibrio cholerae infection (ko05110)	[P]	Inorganic ion transport and metabolism	Ion transport protein	Potassium voltage-gated channel subfamily KQT member 1 OS=Homo sapiens OX=9606 GN=KCNQ1 PE=1 SV=3	P	Inorganic ion transport and metabolism	potassium voltage-gated channel subfamily KQT member 1 isoform 1 [Homo sapiens]	biological process: cellular process (GO:0009987);; biological process: single-organism process (GO:0044699);; biological process: localization (GO:0051179);; biological process: biological regulation (GO:0065007);; molecular function: transporter activity (GO:0005215);; cellular component: cell (GO:0005623);; cellular component: membrane (GO:0016020);; cellular component: macromolecular complex …
ENSG00000023902	PLEKHO1	0.679555	65	0.485604	37	0.554702	37	1.399647	117	1.072256	82	1.617863	124	8.11E-05	-1.266780223	down	--	--	Biological Process: syncytium formation by plasma membrane fusion (GO:0000768);; Biological Process: cell morphogenesis (GO:0000902);; Cellular Component: ruffle (GO:0001726);; Cellular Component: cellular_component (GO:0005575);; Cellular Component: cell (GO:0005623);; Cellular Component: plasma membrane (GO:0005886);; Biological Process: movement of cell or subcellular component (GO:0006928);; …	--	--	--	--	PH domain	Pleckstrin homology domain-containing family O member 1 OS=Homo sapiens OX=9606 GN=PLEKHO1 PE=1 SV=2	T	Signal transduction mechanisms	unnamed protein product [Homo sapiens]	biological process: cellular process (GO:0009987);; biological process: developmental process (GO:0032502);; biological process: single-organism process (GO:0044699);; biological process: cellular component organization or biogenesis (GO:0071840);; cellular component: cell (GO:0005623);; cellular component: cell part (GO:0044464);; cellular component: membrane (GO:0016020);; biological process: b…
ENSG00000168743	NPNT	0.18902	41	0.090465	16	0.127808	21	0.400631	76	0.391441	67	0.283394	50	0.000820792	-1.266365707	down	--	--	Molecular Function: calcium ion binding (GO:0005509);; Cellular Component: membrane (GO:0016020);;	K06824|2.0e-311|hsa:255743|K06824 nephronectin | (RefSeq) NPNT, EGFL6L, POEM; nephronectin	ECM-receptor interaction (ko04512)	[T]	Signal transduction mechanisms	Calcium-binding EGF domain	Nephronectin OS=Homo sapiens OX=9606 GN=NPNT PE=2 SV=3	T	Signal transduction mechanisms	nephronectin, isoform CRA_c [Homo sapiens]	molecular function: binding (GO:0005488);; cellular component: membrane (GO:0016020)
ENSG00000160783	PMF1	65.684376	3185	63.153381	2427	64.973194	2090	124.340807	5363	136.570975	5313	160.230265	5694	3.15E-17	-1.260511055	down	--	--	Cellular Component: nuclear MIS12/MIND complex (GO:0000818);; Cellular Component: nucleoplasm (GO:0005654);; Cellular Component: Golgi apparatus (GO:0005794);; Biological Process: chromosome segregation (GO:0007059);; Cellular Component: intracellular membrane-bounded organelle (GO:0043231);;	K11546|8.7e-106|hsa:11243|K11546 polyamine-modulated factor 1 | (RefSeq) PMF1; polyamine modulated factor 1	--	--	--	Nnf1	Polyamine-modulated factor 1 OS=Homo sapiens OX=9606 GN=PMF1 PE=1 SV=2	K	Transcription	polyamine-modulated factor 1 isoform 2 [Homo sapiens]	cellular component: cell (GO:0005623);; cellular component: membrane-enclosed lumen (GO:0031974);; cellular component: macromolecular complex (GO:0032991);; cellular component: organelle (GO:0043226);; cellular component: organelle part (GO:0044422);; cellular component: cell part (GO:0044464);; biological process: cellular process (GO:0009987);; biological process: single-organism process (GO:00…
ENSG00000160182	TFF1	329.157501	8466	172.710754	3476	260.867859	5028	528.525879	11873	509.669586	10380	667.730713	14097	9.86E-08	-1.254169856	down	--	--	Biological Process: tissue homeostasis (GO:0001894);; Biological Process: system process (GO:0003008);; Cellular Component: cellular_component (GO:0005575);; Cellular Component: extracellular region (GO:0005576);; Cellular Component: extracellular space (GO:0005615);; Cellular Component: intracellular (GO:0005622);; Cellular Component: cell (GO:0005623);; Cellular Component: cytoplasm (GO:0005737…	K22456|3.0e-44|hsa:7031|K22456 trefoil factor 1 | (RefSeq) TFF1, BCEI, D21S21, HP1.A, HPS2, pNR-2, pS2; trefoil factor 1	Estrogen signaling pathway (ko04915)	--	--	Trefoil (P-type) domain	Trefoil factor 1 OS=Homo sapiens OX=9606 GN=TFF1 PE=1 SV=1	O	Posttranslational modification, protein turnover, chaperones	trefoil factor 1 precursor [Homo sapiens]	biological process: biological regulation (GO:0065007);; biological process: multicellular organismal process (GO:0032501);; cellular component: extracellular region (GO:0005576);; cellular component: extracellular region part (GO:0044421);; cellular component: cell (GO:0005623);; cellular component: cell part (GO:0044464);; biological process: metabolic process (GO:0008152);; biological process:…
ENSG00000125319	C17orf53	0.863747	104	1.349904	127	0.932327	85	2.849606	288	2.043856	205	2.348338	225	1.42E-06	-1.253536628	down	--	--	--	--	--	--	--	Domain of unknown function (DUF4539)	Homologous recombination OB-fold protein OS=Homo sapiens OX=9606 GN=HROB PE=1 SV=1	S	Function unknown	homologous recombination OB-fold protein isoform 1 [Homo sapiens]	--
ENSG00000119326	CTNNAL1	3.722144	433	2.472614	226	2.709275	236	7.20071	731	8.539021	786	4.571131	437	4.68E-07	-1.250264837	down	--	--	Biological Process: cell adhesion (GO:0007155);; Biological Process: Rho protein signal transduction (GO:0007266);; Molecular Function: cadherin binding (GO:0045296);; Molecular Function: actin filament binding (GO:0051015);;	K14712|6.3e-276|oaa:100083193|K14712 solute carrier family 39 (zinc transporter), member 6 | (RefSeq) uncharacterized protein LOC100083193 isoform X1	--	[W]	Extracellular structures	Vinculin family	Alpha-catulin OS=Homo sapiens OX=9606 GN=CTNNAL1 PE=1 SV=2	W	Extracellular structures	alpha-catulin isoform b [Homo sapiens]	biological process: biological adhesion (GO:0022610);; biological process: cellular process (GO:0009987);; biological process: signaling (GO:0023052);; biological process: single-organism process (GO:0044699);; biological process: response to stimulus (GO:0050896);; biological process: biological regulation (GO:0065007);; molecular function: binding (GO:0005488)
ENSG00000105808	RASA4	0.54988	103	0.974115	112	0.544698	53	1.273252	198	1.575483	205	1.824215	199	1.39E-05	-1.243940609	down	--	--	Molecular Function: GTPase activator activity (GO:0005096);; Molecular Function: phospholipid binding (GO:0005543);; Biological Process: intracellular signal transduction (GO:0035556);; Biological Process: negative regulation of Ras protein signal transduction (GO:0046580);; Biological Process: cellular response to calcium ion (GO:0071277);;	K17630|0.0e+00|hsa:10156|K17630 Ras GTPase-activating protein 4 | (RefSeq) RASA4, CAPRI, GAPL; RAS p21 protein activator 4	Ras signaling pathway (ko04014)	[T]	Signal transduction mechanisms	C2 domain	Ras GTPase-activating protein 4 OS=Homo sapiens OX=9606 GN=RASA4 PE=2 SV=2	T	Signal transduction mechanisms	ras GTPase-activating protein 4 isoform 1 [Homo sapiens]	biological process: biological regulation (GO:0065007);; molecular function: molecular function regulator (GO:0098772);; molecular function: binding (GO:0005488);; biological process: cellular process (GO:0009987);; biological process: signaling (GO:0023052);; biological process: single-organism process (GO:0044699);; biological process: response to stimulus (GO:0050896)
ENSG00000167325	RRM1	12.606218	1809	13.256904	1487	13.074425	1407	32.059883	4019	32.111381	3644	21.046913	2481	2.80E-12	-1.241602897	down	[F]	Nucleotide transport and metabolism	Molecular Function: nucleotide binding (GO:0000166);; Molecular Function: molecular_function (GO:0003674);; Molecular Function: catalytic activity (GO:0003824);; Molecular Function: ribonucleoside-diphosphate reductase activity, thioredoxin disulfide as acceptor (GO:0004748);; Molecular Function: binding (GO:0005488);; Molecular Function: protein binding (GO:0005515);; Cellular Component: cellula…	K10807|2.2e-13|aju:106966008|K10807 ribonucleoside-diphosphate reductase subunit M1 [EC:1.17.4.1] | (RefSeq) RRM1; ribonucleoside-diphosphate reductase large subunit	Purine metabolism (ko00230);; Pyrimidine metabolism (ko00240);; Glutathione metabolism (ko00480);; Drug metabolism - other enzymes (ko00983)	[F]	Nucleotide transport and metabolism	ATP cone domain	Ribonucleoside-diphosphate reductase large subunit OS=Homo sapiens OX=9606 GN=RRM1 PE=1 SV=1	F	Nucleotide transport and metabolism	RRM1 isoform 4 [Pongo abelii]	molecular function: binding (GO:0005488);; molecular function: catalytic activity (GO:0003824);; biological process: metabolic process (GO:0008152);; biological process: single-organism process (GO:0044699);; cellular component: cell (GO:0005623);; cellular component: cell part (GO:0044464);; cellular component: organelle (GO:0043226);; cellular component: organelle part (GO:0044422);; cellular c…
ENSG00000170892	TSEN34	31.39035	2295	27.072628	1644	30.400048	1730	58.837346	3634	64.787608	3626	78.765821	4759	3.82E-11	-1.240548532	down	[J]	Translation, ribosomal structure and biogenesis	Molecular Function: tRNA-intron endonuclease activity (GO:0000213);; Cellular Component: tRNA-intron endonuclease complex (GO:0000214);; Biological Process: tRNA-type intron splice site recognition and cleavage (GO:0000379);; Molecular Function: nucleic acid binding (GO:0003676);; Cellular Component: nucleoplasm (GO:0005654);; Molecular Function: lyase activity (GO:0016829);;	K15323|4.3e-165|ggo:101147239|K15323 tRNA-splicing endonuclease subunit Sen34 [EC:4.6.1.16] | (RefSeq) TSEN34; tRNA-splicing endonuclease subunit Sen34 isoform X3	--	[J]	Translation, ribosomal structure and biogenesis	tRNA intron endonuclease, catalytic C-terminal domain	tRNA-splicing endonuclease subunit Sen34 OS=Homo sapiens OX=9606 GN=TSEN34 PE=1 SV=1	J	Translation, ribosomal structure and biogenesis	tRNA-splicing endonuclease subunit Sen34 isoform X1 [Homo sapiens]	biological process: metabolic process (GO:0008152);; biological process: cellular process (GO:0009987);; molecular function: catalytic activity (GO:0003824);; cellular component: cell (GO:0005623);; cellular component: macromolecular complex (GO:0032991);; cellular component: organelle (GO:0043226);; cellular component: organelle part (GO:0044422);; cellular component: cell part (GO:0044464);; mo…
ENSG00000144554	FANCD2	2.788268	651	4.13273	765	2.743155	462	9.076777	1888	8.02122	1490	4.435996	864	1.34E-06	-1.240467864	down	--	--	Biological Process: DNA repair (GO:0006281);;	K10891|0.0e+00|mcc:716070|K10891 fanconi anemia group D2 protein | (RefSeq) Fanconi anemia group D2 protein isoform X1	Fanconi anemia pathway (ko03460)	[S]	Function unknown	Fanconi anaemia protein FancD2 nuclease	Fanconi anemia group D2 protein OS=Homo sapiens OX=9606 GN=FANCD2 PE=1 SV=2	S	Function unknown	Fanconi anemia group D2 protein isoform a [Homo sapiens]	biological process: metabolic process (GO:0008152);; biological process: cellular process (GO:0009987);; biological process: response to stimulus (GO:0050896)
ENSG00000068028	RASSF1	7.846212	644	7.314781	471	7.532213	463	16.477936	1182	15.022045	976	17.575402	1184	2.88E-13	-1.240247217	down	--	--	Biological Process: intracellular signal transduction (GO:0035556);; Molecular Function: metal ion binding (GO:0046872);; Biological Process: regulation of microtubule cytoskeleton organization (GO:0070507);;	K09850|9.5e-198|pps:100975339|K09850 Ras association domain-containing protein 1 | (RefSeq) RASSF1; Ras association domain family member 1	Ras signaling pathway (ko04014);; Hippo signaling pathway (ko04390);; Hippo signaling pathway - multiple species (ko04392);; Pathways in cancer (ko05200);; MicroRNAs in cancer (ko05206);; Bladder cancer (ko05219);; Non-small cell lung cancer (ko05223)	[T]	Signal transduction mechanisms	Ras association (RalGDS/AF-6) domain	Ras association domain-containing protein 1 OS=Homo sapiens OX=9606 GN=RASSF1 PE=1 SV=1	T	Signal transduction mechanisms	ras association domain-containing protein 1 isoform A [Homo sapiens]	biological process: cellular process (GO:0009987);; biological process: signaling (GO:0023052);; biological process: single-organism process (GO:0044699);; biological process: response to stimulus (GO:0050896);; biological process: biological regulation (GO:0065007);; molecular function: binding (GO:0005488)
ENSG00000242173	ARHGDIG	0.848018	38	0.857973	30	0.945836	32	1.535128	60	1.930972	68	3.082216	113	0.000779382	-1.239657522	down	--	--	Biological Process: blastocyst hatching (GO:0001835);; Molecular Function: Rho GDP-dissociation inhibitor activity (GO:0005094);; Cellular Component: cytosol (GO:0005829);; Cellular Component: plasma membrane (GO:0005886);; Biological Process: regulation of protein localization (GO:0032880);;	K12462|2.9e-126|hsa:398|K12462 Rho GDP-dissociation inhibitor | (RefSeq) ARHGDIG, RHOGDI-3; Rho GDP dissociation inhibitor gamma	Neurotrophin signaling pathway (ko04722);; Vasopressin-regulated water reabsorption (ko04962)	[T]	Signal transduction mechanisms	RHO protein GDP dissociation inhibitor	Rho GDP-dissociation inhibitor 3 OS=Homo sapiens OX=9606 GN=ARHGDIG PE=1 SV=2	T	Signal transduction mechanisms	rho GDP-dissociation inhibitor 3 [Homo sapiens]	biological process: multicellular organismal process (GO:0032501);; biological process: developmental process (GO:0032502);; biological process: single-organism process (GO:0044699);; biological process: biological regulation (GO:0065007);; molecular function: molecular function regulator (GO:0098772);; cellular component: cell (GO:0005623);; cellular component: cell part (GO:0044464);; cellular …
ENSG00000127586	CHTF18	5.486288	794	6.226908	677	6.74528	723	12.56134	1557	12.875008	1475	14.140306	1659	3.74E-13	-1.238705049	down	[L]	Replication, recombination and repair	Molecular Function: ATP binding (GO:0005524);; Cellular Component: nucleoplasm (GO:0005654);; Cellular Component: cytosol (GO:0005829);;	K11269|0.0e+00|hsa:63922|K11269 chromosome transmission fidelity protein 18 | (RefSeq) CHTF18, C16orf41, C321D2.2, C321D2.3, C321D2.4, CHL12, Ctf18, RUVBL; chromosome transmission fidelity factor 18	--	[DL]	Cell cycle control, cell division, chromosome partitioning;; Replication, recombination and repair	ATPase family associated with various cellular activities (AAA)	Chromosome transmission fidelity protein 18 homolog OS=Homo sapiens OX=9606 GN=CHTF18 PE=1 SV=1	L	Replication, recombination and repair	some homology with holliday junction DNA helicase RUVB like [Homo sapiens]	molecular function: binding (GO:0005488);; cellular component: cell (GO:0005623);; cellular component: organelle (GO:0043226);; cellular component: organelle part (GO:0044422);; cellular component: cell part (GO:0044464)
ENSG00000159147	DONSON	6.00083	492	5.017142	342	4.921012	343	11.69322	990	11.610789	873	8.319332	651	3.17E-11	-1.236216633	down	--	--	Biological Process: cell cycle checkpoint (GO:0000075);; Biological Process: DNA damage checkpoint (GO:0000077);; Biological Process: mitotic cell cycle (GO:0000278);; Cellular Component: cellular_component (GO:0005575);; Cellular Component: intracellular (GO:0005622);; Cellular Component: cell (GO:0005623);; Cellular Component: nucleus (GO:0005634);; Cellular Component: replication fork (GO:0005…	K22422|1.0e-248|hsa:29980|K22422 protein downstream neighbor of Son | (RefSeq) DONSON, B17, C21orf60, MIMIS, MISSLA; DNA replication fork stabilization factor DONSON	--	[S]	Function unknown	--	Protein downstream neighbor of Son OS=Homo sapiens OX=9606 GN=DONSON PE=1 SV=2	L	Replication, recombination and repair	DONSON isoform 3 [Pan troglodytes]	biological process: cellular process (GO:0009987);; biological process: biological regulation (GO:0065007);; biological process: response to stimulus (GO:0050896);; biological process: single-organism process (GO:0044699);; cellular component: cell (GO:0005623);; cellular component: cell part (GO:0044464);; cellular component: organelle (GO:0043226);; cellular component: organelle part (GO:004442…
ENSG00000126215	XRCC3	4.541876	558	5.200204	501	4.63777	426	9.629453	1018	10.658125	1013	11.615413	1119	1.22E-12	-1.234998874	down	[L]	Replication, recombination and repair	Molecular Function: DNA binding (GO:0003677);; Molecular Function: ATP binding (GO:0005524);; Cellular Component: nucleoplasm (GO:0005654);; Cellular Component: cytosol (GO:0005829);; Biological Process: DNA repair (GO:0006281);; Molecular Function: DNA-dependent ATPase activity (GO:0008094);; Biological Process: response to organic substance (GO:0010033);;	K10880|1.5e-195|hsa:7517|K10880 DNA-repair protein XRCC3 | (RefSeq) XRCC3, CMM6; X-ray repair cross complementing 3	Homologous recombination (ko03440)	[L]	Replication, recombination and repair	Rad51	DNA repair protein XRCC3 OS=Homo sapiens OX=9606 GN=XRCC3 PE=1 SV=1	L	Replication, recombination and repair	DNA repair protein XRCC3 [Homo sapiens]	molecular function: binding (GO:0005488);; cellular component: cell (GO:0005623);; cellular component: organelle (GO:0043226);; cellular component: organelle part (GO:0044422);; cellular component: cell part (GO:0044464);; biological process: metabolic process (GO:0008152);; biological process: cellular process (GO:0009987);; biological process: response to stimulus (GO:0050896);; molecular funct…
ENSG00000141753	IGFBP4	76.734383	7880	59.086456	4749	68.969231	5307	139.484787	12511	135.266998	10999	165.858978	13981	3.68E-12	-1.232523755	down	--	--	Biological Process: regulation of cell growth (GO:0001558);; Molecular Function: insulin-like growth factor binding (GO:0005520);; Cellular Component: extracellular space (GO:0005615);; Biological Process: inflammatory response (GO:0006954);; Biological Process: regulation of glucose metabolic process (GO:0010906);; Biological Process: positive regulation of MAPK cascade (GO:0043410);; Biological…	K23576|1.2e-157|csab:103243511|K23576 insulin-like growth factor-binding protein 4 | (RefSeq) IGFBP4; insulin like growth factor binding protein 4	--	--	--	Thyroglobulin type-1 repeat	Insulin-like growth factor-binding protein 4 OS=Homo sapiens OX=9606 GN=IGFBP4 PE=1 SV=2	O	Posttranslational modification, protein turnover, chaperones	insulin-like growth factor-binding protein 4 precursor [Macaca mulatta]	biological process: biological regulation (GO:0065007);; molecular function: binding (GO:0005488);; cellular component: extracellular region (GO:0005576);; cellular component: extracellular region part (GO:0044421);; biological process: response to stimulus (GO:0050896);; biological process: single-organism process (GO:0044699)
ENSG00000149554	CHEK1	3.040851	453	4.268364	487	3.762324	405	10.659125	1099	10.382413	1146	6.542892	704	1.36E-08	-1.231174362	down	[M]	Cell wall/membrane/envelope biogenesis	Biological Process: DNA damage checkpoint (GO:0000077);; Biological Process: G2/M transition of mitotic cell cycle (GO:0000086);; Cellular Component: chromatin (GO:0000785);; Biological Process: inner cell mass cell proliferation (GO:0001833);; Molecular Function: ATP binding (GO:0005524);; Cellular Component: nucleoplasm (GO:0005654);; Cellular Component: replication fork (GO:0005657);; Biologic…	K02216|1.6e-283|hsa:1111|K02216 serine/threonine-protein kinase CHEK1 [EC:2.7.11.1] | (RefSeq) CHEK1, CHK1; checkpoint kinase 1	Cell cycle (ko04110);; p53 signaling pathway (ko04115);; Cellular senescence (ko04218);; Human T-cell leukemia virus 1 infection (ko05166);; Human immunodeficiency virus 1 infection (ko05170);; Viral carcinogenesis (ko05203)	[D]	Cell cycle control, cell division, chromosome partitioning	Protein kinase domain	Serine/threonine-protein kinase Chk1 OS=Homo sapiens OX=9606 GN=CHEK1 PE=1 SV=2	D	Cell cycle control, cell division, chromosome partitioning	serine/threonine-protein kinase Chk1 isoform 1 [Homo sapiens]	biological process: cellular process (GO:0009987);; biological process: response to stimulus (GO:0050896);; biological process: biological regulation (GO:0065007);; biological process: single-organism process (GO:0044699);; cellular component: cell (GO:0005623);; cellular component: organelle (GO:0043226);; cellular component: organelle part (GO:0044422);; cellular component: cell part (GO:004446…
ENSG00000109805	NCAPG	2.73897	596	2.510247	418	2.468024	403	8.175947	1552	7.355402	1268	2.479826	440	6.36E-05	-1.229659397	down	--	--	Cellular Component: condensin complex (GO:0000796);; Biological Process: mitotic chromosome condensation (GO:0007076);;	K06678|0.0e+00|hsa:64151|K06678 condensin complex subunit 3 | (RefSeq) NCAPG, CAPG, CHCG, NY-MEL-3, YCG1; non-SMC condensin I complex subunit G	--	[BD]	Chromatin structure and dynamics;; Cell cycle control, cell division, chromosome partitioning	Nuclear condensing complex subunits, C-term domain	Condensin complex subunit 3 OS=Homo sapiens OX=9606 GN=NCAPG PE=1 SV=1	--	--	condensin complex subunit 3 [Homo sapiens]	cellular component: cell (GO:0005623);; cellular component: macromolecular complex (GO:0032991);; cellular component: organelle (GO:0043226);; cellular component: organelle part (GO:0044422);; cellular component: cell part (GO:0044464);; biological process: cellular process (GO:0009987);; biological process: single-organism process (GO:0044699);; biological process: cellular component organizatio…
ENSG00000146918	NCAPG2	9.282681	1662	9.047357	1510	7.793575	1080	22.099898	3706	22.886637	3292	14.31142	2140	1.15E-09	-1.228243747	down	--	--	Cellular Component: nucleus (GO:0005634);;	K11492|0.0e+00|hsa:54892|K11492 condensin-2 complex subunit G2 | (RefSeq) NCAPG2, 3KS, CAP-G2, CAPG2, LUZP5, MTB, hCAP-G2; non-SMC condensin II complex subunit G2	--	[S]	Function unknown	Condensin II non structural maintenance of chromosomes subunit	Condensin-2 complex subunit G2 OS=Homo sapiens OX=9606 GN=NCAPG2 PE=1 SV=1	K	Transcription	condensin-2 complex subunit G2 isoform b [Homo sapiens]	cellular component: cell (GO:0005623);; cellular component: organelle (GO:0043226);; cellular component: cell part (GO:0044464)
ENSG00000112039	FANCE	1.61004	192	2.326042	217	1.978528	177	4.338223	452	3.586678	339	5.04138	494	3.17E-07	-1.22682147	down	--	--	Biological Process: interstrand cross-link repair (GO:0036297);; Cellular Component: Fanconi anaemia nuclear complex (GO:0043240);;	K10892|3.4e-295|hsa:2178|K10892 fanconi anemia group E protein | (RefSeq) FANCE, FACE, FAE; FA complementation group E	Fanconi anemia pathway (ko03460)	--	--	Fanconi Anaemia group E protein FANCE	Fanconi anemia group E protein OS=Homo sapiens OX=9606 GN=FANCE PE=1 SV=1	L	Replication, recombination and repair	Fanconi anemia group E protein [Homo sapiens]	biological process: metabolic process (GO:0008152);; biological process: cellular process (GO:0009987);; biological process: response to stimulus (GO:0050896);; cellular component: cell (GO:0005623);; cellular component: membrane-enclosed lumen (GO:0031974);; cellular component: macromolecular complex (GO:0032991);; cellular component: organelle (GO:0043226);; cellular component: organelle part (…
ENSG00000187514	PTMA	730.086814	40989	665.240395	26748	762.710282	29322	1460.424607	66703	1469.50112	61858	1562.399964	72867	1.89E-14	-1.223638719	down	--	--	Cellular Component: nucleoplasm (GO:0005654);; Cellular Component: cytosol (GO:0005829);;	K13784|3.0e-20|ccan:109696535|K13784 prothymosin alpha | (RefSeq) Ptma; prothymosin alpha	--	--	--	Prothymosin/parathymosin family	Prothymosin alpha OS=Homo sapiens OX=9606 GN=PTMA PE=1 SV=2	S	Function unknown	prothymosin alpha-like [Rhinopithecus roxellana]	cellular component: cell (GO:0005623);; cellular component: organelle (GO:0043226);; cellular component: organelle part (GO:0044422);; cellular component: cell part (GO:0044464)
ENSG00000129194	SOX15	6.969299	442	7.322381	365	7.482196	364	15.083895	753	15.878612	771	18.49799	948	6.58E-10	-1.219270201	down	--	--	Molecular Function: transcription regulatory region sequence-specific DNA binding (GO:0000976);; Molecular Function: transcriptional activator activity, RNA polymerase II transcription regulatory region sequence-specific binding (GO:0001228);; Cellular Component: nucleoplasm (GO:0005654);; Biological Process: adenohypophysis development (GO:0021984);; Biological Process: positive regulation of ce…	K09271|5.4e-128|hsa:6665|K09271 transcription factor SOX15/30 | (RefSeq) SOX15, SOX20, SOX26, SOX27; SRY-box transcription factor 15	--	[K]	Transcription	HMG (high mobility group) box	Protein SOX-15 OS=Homo sapiens OX=9606 GN=SOX15 PE=1 SV=1	K	Transcription	protein SOX-15 [Homo sapiens]	molecular function: binding (GO:0005488);; biological process: biological regulation (GO:0065007);; molecular function: nucleic acid binding transcription factor activity (GO:0001071);; cellular component: cell (GO:0005623);; cellular component: organelle (GO:0043226);; cellular component: organelle part (GO:0044422);; cellular component: cell part (GO:0044464);; biological process: developmental…
ENSG00000173825	TIGD3	2.651481	250	2.743587	202	2.66404	188	5.045877	414	4.961827	369	7.60689	587	5.93E-07	-1.218219653	down	--	--	Molecular Function: nucleic acid binding (GO:0003676);; Molecular Function: DNA binding (GO:0003677);;	K11496|3.6e-30|hai:109383852|K11496 centromere protein B | (RefSeq) CENPB; centromere protein B	--	[BD]	Chromatin structure and dynamics;; Cell cycle control, cell division, chromosome partitioning	DDE superfamily endonuclease	Tigger transposable element-derived protein 3 OS=Homo sapiens OX=9606 GN=TIGD3 PE=1 SV=1	--	--	tigger transposable element-derived protein 3 [Homo sapiens]	molecular function: binding (GO:0005488)
ENSG00000141401	IMPA2	33.278652	2448	35.283603	2030	31.935388	1701	64.81821	3991	68.826525	3786	85.646718	5065	5.76E-11	-1.212835528	down	[G]	Carbohydrate transport and metabolism	Biological Process: phosphatidylinositol phosphorylation (GO:0046854);; Biological Process: inositol phosphate dephosphorylation (GO:0046855);;	K01092|5.4e-66|hsa:3613|K01092 myo-inositol-1(or 4)-monophosphatase [EC:3.1.3.25] | (RefSeq) IMPA2; inositol monophosphatase 2	Inositol phosphate metabolism (ko00562);; Phosphatidylinositol signaling system (ko04070)	[G]	Carbohydrate transport and metabolism	Inositol monophosphatase family	Inositol monophosphatase 2 OS=Homo sapiens OX=9606 GN=IMPA2 PE=1 SV=1	F	Nucleotide transport and metabolism	IMPA2 isoform 5 [Pan troglodytes]	biological process: metabolic process (GO:0008152);; biological process: cellular process (GO:0009987);; biological process: single-organism process (GO:0044699)
ENSG00000130520	LSM4	37.944764	3268	35.037289	2321	40.122886	2417	71.299091	5129	83.032518	5105	91.010239	6332	3.92E-12	-1.212390698	down	--	--	Biological Process: mRNA splicing, via spliceosome (GO:0000398);; Biological Process: nuclear-transcribed mRNA catabolic process (GO:0000956);; Molecular Function: RNA binding (GO:0003723);; Cellular Component: spliceosomal complex (GO:0005681);;	K12623|4.9e-60|aju:106969085|K12623 U6 snRNA-associated Sm-like protein LSm4 | (RefSeq) LSM4; U6 snRNA-associated Sm-like protein LSm4 isoform X1	RNA degradation (ko03018);; Spliceosome (ko03040)	[A]	RNA processing and modification	LSM domain	U6 snRNA-associated Sm-like protein LSm4 OS=Homo sapiens OX=9606 GN=LSM4 PE=1 SV=1	A	RNA processing and modification	LSM4 homolog, U6 small nuclear RNA associated (S. cerevisiae), isoform CRA_b [Homo sapiens]	biological process: metabolic process (GO:0008152);; biological process: cellular process (GO:0009987);; biological process: biological regulation (GO:0065007);; molecular function: binding (GO:0005488);; cellular component: cell (GO:0005623);; cellular component: macromolecular complex (GO:0032991);; cellular component: organelle (GO:0043226);; cellular component: organelle part (GO:0044422);; c…
ENSG00000197299	BLM	0.771488	190	1.243509	239	0.749947	138	2.572586	553	3.210805	624	0.837113	169	0.000553007	-1.206022431	down	[L]	Replication, recombination and repair	Molecular Function: DNA binding (GO:0003677);; Molecular Function: ATP binding (GO:0005524);; Cellular Component: nucleus (GO:0005634);; Biological Process: DNA replication (GO:0006260);; Biological Process: DNA repair (GO:0006281);; Biological Process: DNA recombination (GO:0006310);; Molecular Function: 3'-5' DNA helicase activity (GO:0043138);;	K10901|0.0e+00|hsa:641|K10901 bloom syndrome protein [EC:3.6.4.12] | (RefSeq) BLM, BS, MGRISCE1, RECQ2, RECQL2, RECQL3; BLM RecQ like helicase	Homologous recombination (ko03440);; Fanconi anemia pathway (ko03460)	[L]	Replication, recombination and repair	N-terminal region of Bloom syndrome protein	Bloom syndrome protein OS=Homo sapiens OX=9606 GN=BLM PE=1 SV=1	L	Replication, recombination and repair	Bloom syndrome protein isoform 1 [Homo sapiens]	molecular function: binding (GO:0005488);; cellular component: cell (GO:0005623);; cellular component: organelle (GO:0043226);; cellular component: cell part (GO:0044464);; biological process: metabolic process (GO:0008152);; biological process: cellular process (GO:0009987);; biological process: response to stimulus (GO:0050896);; biological process: cellular component organization or biogenesis…
ENSG00000196584	XRCC2	1.899712	272	2.731294	306	1.790536	193	6.390291	800	5.237788	594	2.78363	328	1.57E-05	-1.205826012	down	--	--	Biological Process: double-strand break repair via homologous recombination (GO:0000724);; Biological Process: in utero embryonic development (GO:0001701);; Biological Process: somitogenesis (GO:0001756);; Molecular Function: DNA binding (GO:0003677);; Molecular Function: ATP binding (GO:0005524);; Cellular Component: replication fork (GO:0005657);; Molecular Function: DNA-dependent ATPase activi…	K10879|1.2e-158|hsa:7516|K10879 DNA-repair protein XRCC2 | (RefSeq) XRCC2, FANCU; X-ray repair cross complementing 2	Homologous recombination (ko03440)	[L]	Replication, recombination and repair	Rad51	DNA repair protein XRCC2 OS=Homo sapiens OX=9606 GN=XRCC2 PE=1 SV=1	L	Replication, recombination and repair	DNA repair protein XRCC2 [Homo sapiens]	biological process: metabolic process (GO:0008152);; biological process: cellular process (GO:0009987);; biological process: response to stimulus (GO:0050896);; biological process: multicellular organismal process (GO:0032501);; biological process: developmental process (GO:0032502);; biological process: single-organism process (GO:0044699);; molecular function: binding (GO:0005488);; cellular co…
Homo_sapiens_newGene_9910	--	0.320851	45	0.573464	63	0.302927	32	1.110125	136	0.967971	107	0.720968	83	0.000361911	-1.204000614	down	--	--	--	K02927|3.7e-14|nle:100604619|K02927 ubiquitin-large subunit ribosomal protein L40e | (RefSeq) ubiquitin-60S ribosomal protein L40-like isoform X2	Ribosome (ko03010);; Ubiquitin mediated proteolysis (ko04120);; Mitophagy - animal (ko04137);; Parkinson disease (ko05012);; Kaposi sarcoma-associated herpesvirus infection (ko05167)	--	--	--	Uncharacterized protein C9orf85 OS=Homo sapiens OX=9606 GN=C9orf85 PE=1 SV=1	--	--	ELP4 isoform 9 [Pan troglodytes]	--
ENSG00000164032	H2AFZ	132.499725	6055	122.059441	4365	133.578506	4574	273.315552	10909	276.192596	9994	260.36441	9767	2.13E-20	-1.201625733	down	--	--	Cellular Component: nucleosome (GO:0000786);; Molecular Function: DNA binding (GO:0003677);; Cellular Component: nucleus (GO:0005634);; Molecular Function: protein heterodimerization activity (GO:0046982);;	K11251|4.4e-63|aju:106978991|K11251 histone H2A | (RefSeq) histone H2A.Z	Necroptosis (ko04217);; Alcoholism (ko05034);; Systemic lupus erythematosus (ko05322)	[B]	Chromatin structure and dynamics	Core histone H2A/H2B/H3/H4	Histone H2A.Z OS=Homo sapiens OX=9606 GN=H2AZ1 PE=1 SV=2	B	Chromatin structure and dynamics	histone H2A isoform X1 [Theropithecus gelada]	cellular component: cell (GO:0005623);; cellular component: macromolecular complex (GO:0032991);; cellular component: organelle (GO:0043226);; cellular component: organelle part (GO:0044422);; cellular component: cell part (GO:0044464);; molecular function: binding (GO:0005488)
ENSG00000141480	ARRB2	6.21188	492	6.865222	425	6.721328	345	13.366355	848	11.986569	787	14.645556	980	2.50E-10	-1.201219719	down	--	--	Biological Process: signal transduction (GO:0007165);;	K04439|6.0e-239|hsa:409|K04439 beta-arrestin | (RefSeq) ARRB2, ARB2, ARR2, BARR2; arrestin beta 2	MAPK signaling pathway (ko04010);; Chemokine signaling pathway (ko04062);; Endocytosis (ko04144);; Hedgehog signaling pathway (ko04340);; Dopaminergic synapse (ko04728);; Olfactory transduction (ko04740);; Relaxin signaling pathway (ko04926);; Parathyroid hormone synthesis, secretion and action (ko04928);; GnRH secretion (ko04929);; Morphine addiction (ko05032)	[T]	Signal transduction mechanisms	Arrestin (or S-antigen), N-terminal domain	Beta-arrestin-2 OS=Homo sapiens OX=9606 GN=ARRB2 PE=1 SV=2	T	Signal transduction mechanisms	beta-arrestin-2 [Pongo abelii]	biological process: cellular process (GO:0009987);; biological process: biological regulation (GO:0065007)
ENSG00000141576	RNF157	0.15517	36	0.166016	31	0.154055	27	0.36764	75	0.28081	53	0.46401	90	0.00076718	-1.200895375	down	--	--	--	K10604|1.8e-163|lcm:102358123|K10604 E3 ubiquitin-protein ligase MGRN1 [EC:2.3.2.27] | (RefSeq) MGRN1; mahogunin ring finger 1	Ubiquitin mediated proteolysis (ko04120);; Hedgehog signaling pathway (ko04340)	[O]	Posttranslational modification, protein turnover, chaperones	Zinc finger, C3HC4 type (RING finger)	E3 ubiquitin ligase RNF157 OS=Homo sapiens OX=9606 GN=RNF157 PE=1 SV=3	O	Posttranslational modification, protein turnover, chaperones	E3 ubiquitin ligase RNF157 isoform 1 [Homo sapiens]	--
ENSG00000170860	LSM3	7.860915	1400	6.2514	872	7.58685	1013	12.371	1925	15.438168	2177	18.231808	2666	4.11E-09	-1.200454792	down	[K]	Transcription	Biological Process: mRNA splicing, via spliceosome (GO:0000398);; Biological Process: nuclear-transcribed mRNA catabolic process (GO:0000956);; Molecular Function: RNA binding (GO:0003723);; Cellular Component: spliceosomal complex (GO:0005681);; Cellular Component: U6 snRNP (GO:0005688);; Cellular Component: U4/U6 x U5 tri-snRNP complex (GO:0046540);;	K12622|6.8e-51|aju:106978680|K12622 U6 snRNA-associated Sm-like protein LSm3 | (RefSeq) LSM3; U6 snRNA-associated Sm-like protein LSm3	RNA degradation (ko03018);; Spliceosome (ko03040)	[A]	RNA processing and modification	LSM domain	U6 snRNA-associated Sm-like protein LSm3 OS=Homo sapiens OX=9606 GN=LSM3 PE=1 SV=2	A	RNA processing and modification	U6 snRNA-associated Sm-like protein LSm3 [Carlito syrichta]	biological process: metabolic process (GO:0008152);; biological process: cellular process (GO:0009987);; biological process: biological regulation (GO:0065007);; molecular function: binding (GO:0005488);; cellular component: cell (GO:0005623);; cellular component: macromolecular complex (GO:0032991);; cellular component: organelle (GO:0043226);; cellular component: organelle part (GO:0044422);; c…
ENSG00000070814	TCOF1	7.819497	1792	8.62345	1506	7.333236	1234	16.402852	3192	16.802779	2921	17.159919	3149	5.41E-16	-1.197211684	down	--	--	Cellular Component: fibrillar center (GO:0001650);; Cellular Component: nucleoplasm (GO:0005654);; Cellular Component: cytosol (GO:0005829);;	K14562|0.0e+00|hsa:6949|K14562 Treacher Collins syndrome protein | (RefSeq) TCOF1, MFD1, TCS, TCS1, treacle; treacle ribosome biogenesis factor 1	Ribosome biogenesis in eukaryotes (ko03008)	--	--	Treacher Collins syndrome protein Treacle	Treacle protein OS=Homo sapiens OX=9606 GN=TCOF1 PE=1 SV=3	K	Transcription	treacle protein isoform d [Homo sapiens]	cellular component: cell (GO:0005623);; cellular component: membrane-enclosed lumen (GO:0031974);; cellular component: organelle (GO:0043226);; cellular component: organelle part (GO:0044422);; cellular component: cell part (GO:0044464)
ENSG00000100092	SH3BP1	2.91598	369	2.704051	274	2.509141	239	4.974612	550	5.568881	565	6.580957	701	9.57E-09	-1.194426538	down	--	--	Molecular Function: GTPase activator activity (GO:0005096);; Cellular Component: cytoplasm (GO:0005737);; Biological Process: signal transduction (GO:0007165);;	K20652|5.2e-244|hsa:23616|K20652 SH3-domain binding protein 1 | (RefSeq) SH3BP1, ARHGAP43; SH3 domain binding protein 1	--	[T]	Signal transduction mechanisms	RhoGAP domain	SH3 domain-binding protein 1 OS=Homo sapiens OX=9606 GN=SH3BP1 PE=1 SV=3	T	Signal transduction mechanisms	SH3 domain-binding protein 1 isoform X3 [Pan troglodytes]	biological process: biological regulation (GO:0065007);; molecular function: molecular function regulator (GO:0098772);; cellular component: cell (GO:0005623);; cellular component: cell part (GO:0044464);; biological process: cellular process (GO:0009987)
ENSG00000092036	HAUS4	11.459551	723	9.457897	518	9.930391	503	18.661239	1123	19.651601	1094	24.629951	1351	9.01E-11	-1.19398687	down	--	--	Biological Process: centrosome cycle (GO:0007098);; Biological Process: spindle assembly (GO:0051225);; Cellular Component: HAUS complex (GO:0070652);;	K16587|5.7e-201|hsa:54930|K16587 HAUS augmin-like complex subunit 4 | (RefSeq) HAUS4, C14orf94; HAUS augmin like complex subunit 4	--	--	--	HAUS augmin-like complex subunit 4	HAUS augmin-like complex subunit 4 OS=Homo sapiens OX=9606 GN=HAUS4 PE=1 SV=1	S	Function unknown	HAUS augmin-like complex subunit 4 isoform 1 [Homo sapiens]	biological process: cellular process (GO:0009987);; biological process: single-organism process (GO:0044699);; biological process: cellular component organization or biogenesis (GO:0071840);; cellular component: cell (GO:0005623);; cellular component: macromolecular complex (GO:0032991);; cellular component: organelle (GO:0043226);; cellular component: organelle part (GO:0044422);; cellular compo…
ENSG00000156136	DCK	6.965827	870	6.35827	619	7.093894	651	13.877652	1534	15.680144	1574	12.12021	1264	5.35E-14	-1.189100039	down	[F]	Nucleotide transport and metabolism	Molecular Function: ATP binding (GO:0005524);; Cellular Component: nucleoplasm (GO:0005654);; Molecular Function: deoxynucleoside kinase activity (GO:0019136);;	K00893|8.7e-151|hsa:1633|K00893 deoxycitidine kinase [EC:2.7.1.74] | (RefSeq) DCK; deoxycytidine kinase	Purine metabolism (ko00230);; Pyrimidine metabolism (ko00240)	[F]	Nucleotide transport and metabolism	Deoxynucleoside kinase	Deoxycytidine kinase OS=Homo sapiens OX=9606 GN=DCK PE=1 SV=1	F	Nucleotide transport and metabolism	deoxycytidine kinase [Homo sapiens]	molecular function: binding (GO:0005488);; cellular component: cell (GO:0005623);; cellular component: organelle (GO:0043226);; cellular component: organelle part (GO:0044422);; cellular component: cell part (GO:0044464);; biological process: metabolic process (GO:0008152);; biological process: cellular process (GO:0009987);; biological process: single-organism process (GO:0044699);; molecular fu…
ENSG00000115461	IGFBP5	69.079875	19999	31.00386	7023	47.87917	10381	112.78774	28555	105.259276	24167	99.125954	23604	8.90E-07	-1.18648478	down	--	--	Molecular Function: insulin-like growth factor binding (GO:0005520);; Cellular Component: extracellular region (GO:0005576);;	K23577|3.8e-157|hsa:3488|K23577 insulin-like growth factor-binding protein 5 | (RefSeq) IGFBP5, IBP5; insulin like growth factor binding protein 5	--	--	--	Thyroglobulin type-1 repeat	Insulin-like growth factor-binding protein 5 OS=Homo sapiens OX=9606 GN=IGFBP5 PE=1 SV=1	T	Signal transduction mechanisms	insulin-like growth factor-binding protein 5 precursor [Homo sapiens]	molecular function: binding (GO:0005488);; cellular component: extracellular region (GO:0005576)
ENSG00000019144	PHLDB1	0.332688	93	0.291815	55	0.41947	79	1.177081	207	0.765905	141	0.644767	143	2.56E-05	-1.182987591	down	--	--	Cellular Component: cellular_component (GO:0005575);; Cellular Component: intracellular (GO:0005622);; Cellular Component: cell (GO:0005623);; Cellular Component: cytoplasm (GO:0005737);; Cellular Component: cell cortex (GO:0005938);; Biological Process: biological_process (GO:0008150);; Biological Process: regulation of gastrulation (GO:0010470);; Biological Process: regulation of epithelial to …	K17916|2.3e-34|spis:111330590|K17916 kinesin family member 16B | (RefSeq) kinesin-like protein KIF16B	--	--	--	--	Pleckstrin homology-like domain family B member 1 OS=Homo sapiens OX=9606 GN=PHLDB1 PE=1 SV=1	T	Signal transduction mechanisms	PHLDB1 protein [Homo sapiens]	cellular component: cell (GO:0005623);; cellular component: cell part (GO:0044464);; biological process: biological regulation (GO:0065007)
ENSG00000136492	BRIP1	0.92375	249	1.609261	339	0.923926	196	4.038412	977	3.265174	720	0.820794	191	0.00131119	-1.180212277	down	[L]	Replication, recombination and repair	Biological Process: reproduction (GO:0000003);; Biological Process: cell cycle checkpoint (GO:0000075);; Biological Process: DNA damage checkpoint (GO:0000077);; Biological Process: nuclear division (GO:0000280);; Biological Process: meiotic DNA double-strand break processing (GO:0000706);; Biological Process: telomere maintenance (GO:0000723);; Biological Process: DNA double-strand break process…	K15362|0.0e+00|hsa:83990|K15362 fanconi anemia group J protein [EC:3.6.4.12] | (RefSeq) BRIP1, BACH1, FANCJ, OF; BRCA1 interacting protein C-terminal helicase 1	Homologous recombination (ko03440);; Fanconi anemia pathway (ko03460)	[L]	Replication, recombination and repair	Helicase C-terminal domain	Fanconi anemia group J protein OS=Homo sapiens OX=9606 GN=BRIP1 PE=1 SV=2	L	Replication, recombination and repair	Fanconi anemia group J protein [Homo sapiens]	biological process: reproduction (GO:0000003);; biological process: cellular process (GO:0009987);; biological process: biological regulation (GO:0065007);; biological process: response to stimulus (GO:0050896);; biological process: cellular component organization or biogenesis (GO:0071840);; biological process: metabolic process (GO:0008152);; biological process: reproductive process (GO:0022414…
ENSG00000135045	C9orf40	0.593289	65	0.307701	27	0.452164	37	0.829848	79	1.357859	117	0.984449	88	0.000689183	-1.178980963	down	--	--	Molecular Function: RNA polymerase II transcription factor activity, sequence-specific DNA binding (GO:0000981);; Molecular Function: molecular_function (GO:0003674);; Molecular Function: transcription factor activity, sequence-specific DNA binding (GO:0003700);; Biological Process: regulation of transcription, DNA-templated (GO:0006355);; Biological Process: regulation of transcription from RNA …	--	--	--	--	Putative WW-binding domain and destruction box	Uncharacterized protein C9orf40 OS=Homo sapiens OX=9606 GN=C9orf40 PE=1 SV=1	K	Transcription	uncharacterized protein C9orf40 homolog [Gorilla gorilla gorilla]	biological process: biological regulation (GO:0065007);; molecular function: nucleic acid binding transcription factor activity (GO:0001071)
ENSG00000175093	SPSB4	0.2583	36	0.271518	29	0.192711	20	0.439176	53	0.582517	63	0.68449	77	0.001355924	-1.177522615	down	--	--	Molecular Function: protein binding (GO:0005515);; Cellular Component: cellular_component (GO:0005575);; Cellular Component: intracellular (GO:0005622);; Cellular Component: cell (GO:0005623);; Cellular Component: cytoplasm (GO:0005737);; Cellular Component: cytosol (GO:0005829);; Biological Process: cellular protein modification process (GO:0006464);; Biological Process: nitrogen compound metabo…	K10343|5.9e-158|ggo:101131310|K10343 SPRY domain-containing SOCS box protein 1/4 | (RefSeq) SPSB4; SPRY domain-containing SOCS box protein 4	--	[R]	General function prediction only	SPRY domain	SPRY domain-containing SOCS box protein 4 OS=Homo sapiens OX=9606 GN=SPSB4 PE=1 SV=1	S	Function unknown	SPRY domain-containing SOCS box protein 4 [Homo sapiens]	molecular function: binding (GO:0005488);; cellular component: cell (GO:0005623);; cellular component: cell part (GO:0044464);; biological process: metabolic process (GO:0008152);; biological process: cellular process (GO:0009987)
ENSG00000204308	RNF5	26.228823	1430	26.76087	1142	25.484068	1042	44.095772	2100	52.595177	2271	66.496948	2976	3.36E-09	-1.177432079	down	--	--	Cellular Component: endoplasmic reticulum (GO:0005783);; Biological Process: response to bacterium (GO:0009617);; Biological Process: negative regulation of autophagy (GO:0010507);; Cellular Component: integral component of membrane (GO:0016021);; Biological Process: protein ubiquitination (GO:0016567);; Biological Process: protein destabilization (GO:0031648);; Biological Process: regulation of …	K10666|7.9e-103|ggo:101124724|K10666 E3 ubiquitin-protein ligase RNF5 [EC:2.3.2.27] | (RefSeq) RNF5; E3 ubiquitin-protein ligase RNF5	Protein processing in endoplasmic reticulum (ko04141)	[O]	Posttranslational modification, protein turnover, chaperones	Zinc finger, C3HC4 type (RING finger)	E3 ubiquitin-protein ligase RNF5 OS=Homo sapiens OX=9606 GN=RNF5 PE=1 SV=1	O	Posttranslational modification, protein turnover, chaperones	E3 ubiquitin-protein ligase RNF5 [Homo sapiens]	cellular component: cell (GO:0005623);; cellular component: organelle (GO:0043226);; cellular component: cell part (GO:0044464);; biological process: response to stimulus (GO:0050896);; biological process: multi-organism process (GO:0051704);; biological process: biological regulation (GO:0065007);; cellular component: membrane (GO:0016020);; cellular component: membrane part (GO:0044425);; biolo…
ENSG00000078295	ADCY2	0.264814	82	0.164086	40	0.247087	57	0.502162	135	0.517948	126	0.477195	121	6.41E-05	-1.176106191	down	[T]	Signal transduction mechanisms	Molecular Function: adenylate cyclase activity (GO:0004016);; Molecular Function: ATP binding (GO:0005524);; Cellular Component: plasma membrane (GO:0005886);; Biological Process: cAMP biosynthetic process (GO:0006171);; Cellular Component: integral component of membrane (GO:0016021);; Biological Process: intracellular signal transduction (GO:0035556);; Molecular Function: metal ion binding (GO:0…	K08042|0.0e+00|hsa:108|K08042 adenylate cyclase 2 [EC:4.6.1.1] | (RefSeq) ADCY2, AC2, HBAC2; adenylate cyclase 2	Purine metabolism (ko00230);; Endocrine resistance (ko01522);; Rap1 signaling pathway (ko04015);; Calcium signaling pathway (ko04020);; cGMP-PKG signaling pathway (ko04022);; cAMP signaling pathway (ko04024);; Chemokine signaling pathway (ko04062);; Phospholipase D signaling pathway (ko04072);; Oocyte meiosis (ko04114);; Longevity regulating pathway (ko04211);; Longevity regulating pathway - mult…	[C]	Energy production and conversion	Adenylate and Guanylate cyclase catalytic domain	Adenylate cyclase type 2 OS=Homo sapiens OX=9606 GN=ADCY2 PE=1 SV=5	C	Energy production and conversion	adenylate cyclase type 2 [Homo sapiens]	molecular function: catalytic activity (GO:0003824);; molecular function: binding (GO:0005488);; cellular component: cell (GO:0005623);; cellular component: membrane (GO:0016020);; cellular component: cell part (GO:0044464);; biological process: metabolic process (GO:0008152);; biological process: cellular process (GO:0009987);; biological process: single-organism process (GO:0044699);; cellular …
ENSG00000124107	SLPI	12.844535	358	16.607979	362	14.319351	299	28.636751	696	24.598423	542	38.895672	889	6.26E-07	-1.174683307	down	--	--	Biological Process: cell activation (GO:0001775);; Biological Process: response to molecule of bacterial origin (GO:0002237);; Biological Process: immune effector process (GO:0002252);; Biological Process: cell activation involved in immune response (GO:0002263);; Biological Process: myeloid leukocyte activation (GO:0002274);; Biological Process: myeloid cell activation involved in immune respons…	K23638|3.8e-78|hsa:6590|K23638 antileukoproteinase | (RefSeq) SLPI, ALK1, ALP, BLPI, HUSI, HUSI-I, MPI, WAP4, WFDC4; secretory leukocyte peptidase inhibitor	--	--	--	WAP-type (Whey Acidic Protein) 'four-disulfide core'	Antileukoproteinase OS=Homo sapiens OX=9606 GN=SLPI PE=1 SV=2	W	Extracellular structures	antileukoproteinase precursor [Homo sapiens]	biological process: cellular process (GO:0009987);; biological process: single-organism process (GO:0044699);; biological process: response to stimulus (GO:0050896);; biological process: immune system process (GO:0002376);; molecular function: binding (GO:0005488);; biological process: biological regulation (GO:0065007);; molecular function: molecular function regulator (GO:0098772);; cellular co…
ENSG00000143499	SMYD2	10.226733	796	8.556071	523	9.384202	549	20.361209	1386	19.205736	1187	18.456335	1182	1.07E-13	-1.172900089	down	--	--	Biological Process: negative regulation of transcription from RNA polymerase II promoter (GO:0000122);; Molecular Function: RNA polymerase II core binding (GO:0000993);; Molecular Function: basal transcription machinery binding (GO:0001098);; Molecular Function: basal RNA polymerase II transcription machinery binding (GO:0001099);; Molecular Function: p53 binding (GO:0002039);; Molecular Function…	K11426|2.2e-255|hsa:56950|K11426 [histone H3]-lysine4/36 N-trimethyltransferase SMYD [EC:2.1.1.354 2.1.1.357] | (RefSeq) SMYD2, HSKM-B, KMT3C, ZMYND14; SET and MYND domain containing 2	Lysine degradation (ko00310)	[B]	Chromatin structure and dynamics	SET domain	N-lysine methyltransferase SMYD2 OS=Homo sapiens OX=9606 GN=SMYD2 PE=1 SV=2	B	Chromatin structure and dynamics	N-lysine methyltransferase SMYD2 [Homo sapiens]	biological process: biological regulation (GO:0065007);; molecular function: binding (GO:0005488);; molecular function: catalytic activity (GO:0003824);; cellular component: cell (GO:0005623);; cellular component: cell part (GO:0044464);; cellular component: organelle (GO:0043226);; cellular component: organelle part (GO:0044422);; biological process: cellular process (GO:0009987);; biological pr…
ENSG00000104872	PIH1D1	46.071668	2481	37.982726	1591	48.280606	1974	84.883355	4005	84.839547	3611	103.942007	4591	2.12E-10	-1.169693054	down	--	--	Biological Process: small nucleolar ribonucleoprotein complex assembly (GO:0000491);; Biological Process: box C/D snoRNP assembly (GO:0000492);; Molecular Function: transcription regulatory region sequence-specific DNA binding (GO:0000976);; Molecular Function: RNA polymerase I regulatory region DNA binding (GO:0001013);; Molecular Function: core promoter sequence-specific DNA binding (GO:0001046…	K12302|6.5e-30|cmy:102947352|K12302 MFS transporter, ACS family, solute carrier family 17 (sodium-dependent inorganic phosphate cotransporter), member 6/7/8 | (RefSeq) PIH1 domain-containing protein 1-like	--	[S]	Function unknown	PIH1 N-terminal domain	PIH1 domain-containing protein 1 OS=Homo sapiens OX=9606 GN=PIH1D1 PE=1 SV=1	K	Transcription	PIH1 domain-containing protein 1 [Homo sapiens]	biological process: cellular process (GO:0009987);; biological process: cellular component organization or biogenesis (GO:0071840);; molecular function: binding (GO:0005488);; biological process: metabolic process (GO:0008152);; biological process: biological regulation (GO:0065007);; cellular component: cell (GO:0005623);; cellular component: cell part (GO:0044464);; cellular component: organell…
ENSG00000134871	COL4A2	0.24364	75	0.287378	68	0.341842	52	0.609968	155	0.481393	104	0.717319	159	6.96E-05	-1.169421446	down	--	--	Molecular Function: extracellular matrix structural constituent (GO:0005201);; Cellular Component: collagen type IV trimer (GO:0005587);; Biological Process: transcription, DNA-templated (GO:0006351);; Biological Process: aging (GO:0007568);; Biological Process: response to activity (GO:0014823);; Biological Process: collagen-activated tyrosine kinase receptor signaling pathway (GO:0038063);; Bio…	K06237|2.7e-192|hsa:1284|K06237 collagen type IV alpha | (RefSeq) COL4A2, BSVD2, ICH, POREN2; collagen type IV alpha 2 chain	PI3K-Akt signaling pathway (ko04151);; Focal adhesion (ko04510);; ECM-receptor interaction (ko04512);; Relaxin signaling pathway (ko04926);; AGE-RAGE signaling pathway in diabetic complications (ko04933);; Protein digestion and absorption (ko04974);; Amoebiasis (ko05146);; Human papillomavirus infection (ko05165);; Pathways in cancer (ko05200);; Small cell lung cancer (ko05222)	[W]	Extracellular structures	Collagen triple helix repeat (20 copies)	Collagen alpha-2(IV) chain OS=Homo sapiens OX=9606 GN=COL4A2 PE=1 SV=4	W	Extracellular structures	collagen alpha-2(IV) chain preproprotein [Homo sapiens]	molecular function: structural molecule activity (GO:0005198);; cellular component: extracellular region (GO:0005576);; cellular component: macromolecular complex (GO:0032991);; cellular component: extracellular region part (GO:0044421);; cellular component: supramolecular complex (GO:0099080);; biological process: metabolic process (GO:0008152);; biological process: cellular process (GO:0009987)…
ENSG00000153048	CARHSP1	23.477269	2132	18.625981	1289	23.372457	1510	41.987301	3204	40.92466	2940	52.86532	3749	3.60E-10	-1.169237683	down	--	--	Molecular Function: nucleic acid binding (GO:0003676);;	K15441|1.8e-28|tsp:Tsp_04322|K15441 tRNA-specific adenosine deaminase 2 [EC:3.5.4.-] | (RefSeq) tRNA-specific adenosine deaminase 2	--	[J]	Translation, ribosomal structure and biogenesis	'Cold-shock' DNA-binding domain	Calcium-regulated heat-stable protein 1 OS=Homo sapiens OX=9606 GN=CARHSP1 PE=1 SV=2	K	Transcription	calcium-regulated heat-stable protein 1 [Homo sapiens]	molecular function: binding (GO:0005488)
ENSG00000149503	INCENP	13.997911	2570	16.847501	2429	13.111242	1799	31.005283	4974	29.051803	4242	29.971061	4512	9.67E-14	-1.169144633	down	--	--	Biological Process: mitotic sister chromatid segregation (GO:0000070);; Biological Process: regulation of mitotic cytokinesis (GO:1902412);;	K11515|0.0e+00|hsa:3619|K11515 inner centromere protein | (RefSeq) INCENP; inner centromere protein	--	[D]	Cell cycle control, cell division, chromosome partitioning	Chromosome passenger complex (CPC) protein INCENP N terminal	Inner centromere protein OS=Homo sapiens OX=9606 GN=INCENP PE=1 SV=3	D	Cell cycle control, cell division, chromosome partitioning	inner centromere protein isoform 1 [Homo sapiens]	biological process: cellular process (GO:0009987);; biological process: single-organism process (GO:0044699);; biological process: cellular component organization or biogenesis (GO:0071840);; biological process: biological regulation (GO:0065007)
ENSG00000172482	AGXT	0.780313	68	0.320705	22	0.241921	16	1.162819	89	0.664944	46	1.568563	113	0.005817367	-1.167959553	down	[EF]	Amino acid transport and metabolism;; Nucleotide transport and metabolism	Molecular Function: serine-pyruvate transaminase activity (GO:0004760);; Molecular Function: alanine-glyoxylate transaminase activity (GO:0008453);;	K00830|5.9e-228|hsa:189|K00830 alanine-glyoxylate transaminase / serine-glyoxylate transaminase / serine-pyruvate transaminase [EC:2.6.1.44 2.6.1.45 2.6.1.51] | (RefSeq) AGXT, AGT, AGT1, AGXT1, PH1, SPAT, SPT, TLH6; alanine--glyoxylate and serine--pyruvate aminotransferase	Alanine, aspartate and glutamate metabolism (ko00250);; Glycine, serine and threonine metabolism (ko00260);; Glyoxylate and dicarboxylate metabolism (ko00630);; Carbon metabolism (ko01200);; Peroxisome (ko04146)	[R]	General function prediction only	Aminotransferase class-V	Serine--pyruvate aminotransferase OS=Homo sapiens OX=9606 GN=AGXT PE=1 SV=1	E	Amino acid transport and metabolism	serine--pyruvate aminotransferase [Homo sapiens]	molecular function: catalytic activity (GO:0003824)
ENSG00000129810	SGO1	2.260147	210	3.587043	283	2.477106	186	6.779921	613	6.089793	500	4.044068	347	5.61E-06	-1.167099532	down	--	--	Cellular Component: chromosome, centromeric region (GO:0000775);; Cellular Component: nucleoplasm (GO:0005654);; Cellular Component: cytosol (GO:0005829);; Cellular Component: nuclear body (GO:0016604);; Biological Process: meiotic chromosome segregation (GO:0045132);; Biological Process: mitotic sister chromatid cohesion, centromeric (GO:0071962);;	K11580|4.5e-271|hsa:151648|K11580 shugoshin-like 1 | (RefSeq) SGO1, CAID, NY-BR-85, SGO, SGOL1; shugoshin 1	Oocyte meiosis (ko04114)	--	--	Shugoshin N-terminal coiled-coil region	Shugoshin 1 OS=Homo sapiens OX=9606 GN=SGO1 PE=1 SV=1	K	Transcription	shugoshin 1 isoform 1 [Homo sapiens]	cellular component: cell (GO:0005623);; cellular component: organelle (GO:0043226);; cellular component: organelle part (GO:0044422);; cellular component: cell part (GO:0044464);; cellular component: membrane-enclosed lumen (GO:0031974);; biological process: reproduction (GO:0000003);; biological process: cellular process (GO:0009987);; biological process: reproductive process (GO:0022414);; biol…
ENSG00000176894	PXMP2	4.84717	205	4.867517	161	5.019112	161	10.033505	374	8.492488	287	11.837888	425	4.70E-07	-1.166299082	down	--	--	Cellular Component: integral component of membrane (GO:0016021);;	K13347|1.6e-104|hsa:5827|K13347 peroxisomal membrane protein 2 | (RefSeq) PXMP2, MPV17L3, PMP22; peroxisomal membrane protein 2	Peroxisome (ko04146)	[R]	General function prediction only	Mpv17 / PMP22 family	Peroxisomal membrane protein 2 OS=Homo sapiens OX=9606 GN=PXMP2 PE=1 SV=3	U	Intracellular trafficking, secretion, and vesicular transport	peroxisomal membrane protein 2 [Homo sapiens]	cellular component: membrane (GO:0016020);; cellular component: membrane part (GO:0044425)
ENSG00000104824	HNRNPL	74.736437	7437	60.661822	4800	72.245063	5451	129.986044	11448	135.02283	11215	147.745045	12609	6.15E-13	-1.165900253	down	--	--	Molecular Function: RNA binding (GO:0003723);; Cellular Component: nucleus (GO:0005634);; Biological Process: mRNA processing (GO:0006397);;	K13159|1.5e-288|bbub:102397362|K13159 heterogeneous nuclear ribonucleoprotein L | (RefSeq) HNRNPL; heterogeneous nuclear ribonucleoprotein L isoform X1	--	[A]	RNA processing and modification	RNA recognition motif. (a.k.a. RRM, RBD, or RNP domain)	Heterogeneous nuclear ribonucleoprotein L OS=Homo sapiens OX=9606 GN=HNRNPL PE=1 SV=2	A	RNA processing and modification	heterogeneous nuclear ribonucleoprotein L isoform X2 [Nomascus leucogenys]	molecular function: binding (GO:0005488);; cellular component: cell (GO:0005623);; cellular component: organelle (GO:0043226);; cellular component: cell part (GO:0044464);; biological process: metabolic process (GO:0008152);; biological process: cellular process (GO:0009987)
ENSG00000137561	TTPA	1.224797	134	0.841397	72	0.746637	62	1.658742	159	2.547325	221	1.932545	174	5.51E-05	-1.164333926	down	--	--	Biological Process: reproduction (GO:0000003);; Biological Process: in utero embryonic development (GO:0001701);; Biological Process: placenta development (GO:0001890);; Biological Process: embryonic placenta development (GO:0001892);; Biological Process: developmental process involved in reproduction (GO:0003006);; Molecular Function: molecular_function (GO:0003674);; Molecular Function: transpo…	K19625|1.4e-37|mze:101483584|K19625 retinaldehyde-binding protein 1 | (RefSeq) retinaldehyde-binding protein 1	--	[I]	Lipid transport and metabolism	CRAL/TRIO domain	Alpha-tocopherol transfer protein OS=Homo sapiens OX=9606 GN=TTPA PE=1 SV=1	I	Lipid transport and metabolism	alpha-tocopherol transfer protein [Homo sapiens]	biological process: reproduction (GO:0000003);; biological process: multicellular organismal process (GO:0032501);; biological process: developmental process (GO:0032502);; biological process: single-organism process (GO:0044699);; biological process: reproductive process (GO:0022414);; molecular function: transporter activity (GO:0005215);; biological process: localization (GO:0051179);; molecul…
Homo_sapiens_newGene_1509	--	0.231019	67	0.363767	83	0.117788	26	0.631886	160	0.61044	140	0.406523	97	0.001230512	-1.158238469	down	--	--	--	--	--	--	--	Leucine-rich repeat-containing protein 37 family	Putative uncharacterized protein FLJ43944 OS=Homo sapiens OX=9606 PE=5 SV=1	B	Chromatin structure and dynamics	RecName: Full=Putative uncharacterized protein FLJ43944 [Homo sapiens]	--
ENSG00000099377	HSD3B7	12.505408	1255	9.861557	772	13.304301	966	19.987704	1762	23.105634	1830	29.351989	2413	3.93E-08	-1.156540041	down	[M]	Cell wall/membrane/envelope biogenesis	Molecular Function: 3-beta-hydroxy-delta5-steroid dehydrogenase activity (GO:0003854);; Cellular Component: lipid droplet (GO:0005811);; Biological Process: steroid biosynthetic process (GO:0006694);;	K12408|3.8e-98|hsa:80270|K12408 cholest-5-ene-3beta,7alpha-diol 3beta-dehydrogenase [EC:1.1.1.181] | (RefSeq) HSD3B7, CBAS1, PFIC4, SDR11E3; hydroxy-delta-5-steroid dehydrogenase, 3 beta- and steroid delta-isomerase 7	Primary bile acid biosynthesis (ko00120)	[IE]	Lipid transport and metabolism;; Amino acid transport and metabolism	3-beta hydroxysteroid dehydrogenase/isomerase family	3 beta-hydroxysteroid dehydrogenase type 7 OS=Homo sapiens OX=9606 GN=HSD3B7 PE=1 SV=2	--	--	3 beta-hydroxysteroid dehydrogenase type 7 isoform b [Homo sapiens]	biological process: metabolic process (GO:0008152);; biological process: single-organism process (GO:0044699);; molecular function: catalytic activity (GO:0003824);; cellular component: cell (GO:0005623);; cellular component: organelle (GO:0043226);; cellular component: cell part (GO:0044464)
ENSG00000163950	SLBP	19.262326	1774	14.971138	1082	15.957629	1104	32.788728	2621	37.8801	2757	32.130796	2422	1.40E-12	-1.154502454	down	--	--	Molecular Function: mRNA binding (GO:0003729);; Cellular Component: nucleoplasm (GO:0005654);; Cellular Component: nucleolus (GO:0005730);; Cellular Component: cytosol (GO:0005829);; Biological Process: mRNA 3'-end processing by stem-loop binding and cleavage (GO:0006398);; Cellular Component: histone pre-mRNA 3'end processing complex (GO:0071204);; Molecular Function: histone pre-mRNA stem-loop …	K18710|3.3e-153|ggo:101139035|K18710 histone RNA hairpin-binding protein | (RefSeq) SLBP; histone RNA hairpin-binding protein isoform X2	--	[A]	RNA processing and modification	Histone RNA hairpin-binding protein RNA-binding domain	Histone RNA hairpin-binding protein OS=Homo sapiens OX=9606 GN=SLBP PE=1 SV=1	A	RNA processing and modification	histone RNA hairpin-binding protein isoform 1 [Homo sapiens]	molecular function: binding (GO:0005488);; cellular component: cell (GO:0005623);; cellular component: organelle (GO:0043226);; cellular component: organelle part (GO:0044422);; cellular component: cell part (GO:0044464);; biological process: metabolic process (GO:0008152);; biological process: cellular process (GO:0009987);; cellular component: macromolecular complex (GO:0032991)
ENSG00000168243	GNG4	0.524082	122	0.50679	95	0.948555	140	1.421925	226	1.361474	232	1.539463	296	2.58E-05	-1.154402496	down	--	--	Molecular Function: GTPase activity (GO:0003924);; Cellular Component: heterotrimeric G-protein complex (GO:0005834);; Biological Process: G-protein coupled receptor signaling pathway (GO:0007186);;	K04541|6.6e-35|aju:106982557|K04541 guanine nucleotide-binding protein G(I)/G(S)/G(O) subunit gamma-4 | (RefSeq) GNG4; guanine nucleotide-binding protein G(I)/G(S)/G(O) subunit gamma-4 isoform X1	Ras signaling pathway (ko04014);; Chemokine signaling pathway (ko04062);; PI3K-Akt signaling pathway (ko04151);; Apelin signaling pathway (ko04371);; Circadian entrainment (ko04713);; Retrograde endocannabinoid signaling (ko04723);; Glutamatergic synapse (ko04724);; Cholinergic synapse (ko04725);; Serotonergic synapse (ko04726);; GABAergic synapse (ko04727);; Dopaminergic synapse (ko04728);; Rela…	[T]	Signal transduction mechanisms	GGL domain	Guanine nucleotide-binding protein G(I)/G(S)/G(O) subunit gamma-4 OS=Homo sapiens OX=9606 GN=GNG4 PE=1 SV=1	T	Signal transduction mechanisms	guanine nucleotide-binding protein G(I)/G(S)/G(O) subunit gamma-4 [Homo sapiens]	molecular function: catalytic activity (GO:0003824);; cellular component: cell (GO:0005623);; cellular component: membrane (GO:0016020);; cellular component: macromolecular complex (GO:0032991);; cellular component: membrane part (GO:0044425);; cellular component: cell part (GO:0044464);; biological process: cellular process (GO:0009987);; biological process: signaling (GO:0023052);; biological p…
ENSG00000140451	PIF1	1.07151	134	0.759317	75	0.478484	45	1.769341	194	1.68252	168	1.577316	163	0.000138778	-1.154293655	down	[S]	Function unknown	Biological Process: telomere maintenance (GO:0000723);; Molecular Function: DNA helicase activity (GO:0003678);; Molecular Function: ATP binding (GO:0005524);; Biological Process: DNA repair (GO:0006281);; Biological Process: DNA recombination (GO:0006310);;	K15255|0.0e+00|hsa:80119|K15255 ATP-dependent DNA helicase PIF1 [EC:3.6.4.12] | (RefSeq) PIF1, C15orf20, PIF; PIF1 5'-to-3' DNA helicase	--	[D]	Cell cycle control, cell division, chromosome partitioning	PIF1-like helicase	ATP-dependent DNA helicase PIF1 OS=Homo sapiens OX=9606 GN=PIF1 PE=1 SV=2	L	Replication, recombination and repair	ATP-dependent DNA helicase PIF1 isoform a [Homo sapiens]	biological process: metabolic process (GO:0008152);; biological process: cellular process (GO:0009987);; biological process: biological regulation (GO:0065007);; biological process: cellular component organization or biogenesis (GO:0071840);; molecular function: catalytic activity (GO:0003824);; molecular function: binding (GO:0005488);; biological process: response to stimulus (GO:0050896)
Homo_sapiens_newGene_11300	--	8.223201	301	7.008381	194	9.310666	257	15.708698	485	15.500015	434	21.143934	614	8.38E-07	-1.154024671	down	--	--	Molecular Function: endopeptidase inhibitor activity (GO:0004866);; Cellular Component: extracellular space (GO:0005615);;	K23589|4.7e-66|ggo:101143538|K23589 pregnancy zone protein | (RefSeq) LOW QUALITY PROTEIN: pregnancy zone protein-like	--	[O]	Posttranslational modification, protein turnover, chaperones	A-macroglobulin TED domain	Alpha-2-macroglobulin OS=Homo sapiens OX=9606 GN=A2M PE=1 SV=3	O	Posttranslational modification, protein turnover, chaperones	LOW QUALITY PROTEIN: pregnancy zone protein-like [Gorilla gorilla gorilla]	biological process: biological regulation (GO:0065007);; molecular function: molecular function regulator (GO:0098772);; cellular component: extracellular region (GO:0005576);; cellular component: extracellular region part (GO:0044421)
ENSG00000115325	DOK1	0.87134	104	1.209562	107	1.062523	91	1.716046	175	2.469841	220	2.792412	235	1.39E-05	-1.153421869	down	--	--	Biological Process: cell morphogenesis (GO:0000902);; Biological Process: cell morphogenesis involved in differentiation (GO:0000904);; Biological Process: regulation of protein phosphorylation (GO:0001932);; Biological Process: negative regulation of protein phosphorylation (GO:0001933);; Cellular Component: cellular_component (GO:0005575);; Cellular Component: intracellular (GO:0005622);; Cellu…	K14752|1.9e-284|hsa:1796|K14752 docking protein 1 | (RefSeq) DOK1, P62DOK, pp62; docking protein 1	--	[T]	Signal transduction mechanisms	PTB domain (IRS-1 type)	Docking protein 1 OS=Homo sapiens OX=9606 GN=DOK1 PE=1 SV=1	T	Signal transduction mechanisms	docking protein 1 isoform a [Homo sapiens]	biological process: cellular process (GO:0009987);; biological process: developmental process (GO:0032502);; biological process: single-organism process (GO:0044699);; biological process: cellular component organization or biogenesis (GO:0071840);; biological process: biological regulation (GO:0065007);; cellular component: cell (GO:0005623);; cellular component: cell part (GO:0044464);; cellular…
Homo_sapiens_newGene_10825	--	0.289327	19	0.630114	36	0.174265	13	0.738296	58	0.672899	48	0.893634	61	0.005231864	-1.153403412	down	--	--	--	--	--	--	--	--	--	--	--	--	--
ENSG00000161692	DBF4B	3.181835	410	3.567637	392	3.388443	320	6.362331	745	7.513315	772	6.838331	738	8.33E-11	-1.152365512	down	--	--	Biological Process: regulation of protein phosphorylation (GO:0001932);; Biological Process: positive regulation of protein phosphorylation (GO:0001934);; Molecular Function: molecular_function (GO:0003674);; Molecular Function: binding (GO:0005488);; Molecular Function: protein binding (GO:0005515);; Cellular Component: cellular_component (GO:0005575);; Cellular Component: intracellular (GO:0005…	K06629|1.9e-15|lcm:102356028|K06629 activator of S phase kinase | (RefSeq) DBF4; DBF4 zinc finger	Cell cycle (ko04110)	[LD]	Replication, recombination and repair;; Cell cycle control, cell division, chromosome partitioning	--	Protein DBF4 homolog B OS=Homo sapiens OX=9606 GN=DBF4B PE=1 SV=1	K	Transcription	unnamed protein product [Homo sapiens]	biological process: biological regulation (GO:0065007);; molecular function: binding (GO:0005488);; cellular component: cell (GO:0005623);; cellular component: cell part (GO:0044464);; cellular component: organelle (GO:0043226);; cellular component: organelle part (GO:0044422);; molecular function: molecular function regulator (GO:0098772);; cellular component: membrane-enclosed lumen (GO:0031974)
ENSG00000235162	C12orf75	0.901725	58	1.071139	54	1.053188	51	1.914205	108	2.546419	127	2.107506	111	7.42E-05	-1.151834026	down	--	--	--	K02953|9.5e-19|umr:103676563|K02953 small subunit ribosomal protein S13e | (RefSeq) chromosome unknown open reading frame, human C12orf75	Ribosome (ko03010)	--	--	OCC1 family	Overexpressed in colon carcinoma 1 protein OS=Homo sapiens OX=9606 GN=OCC1 PE=1 SV=2	S	Function unknown	overexpressed in colon carcinoma 1 protein [Homo sapiens]	--
ENSG00000136997	MYC	22.054044	2323	16.84463	1362	18.382919	1494	43.67332	4031	35.606589	3047	36.351921	3160	1.46E-11	-1.149243705	down	--	--	Biological Process: negative regulation of transcription from RNA polymerase II promoter (GO:0000122);; Biological Process: re-entry into mitotic cell cycle (GO:0000320);; Biological Process: ovarian follicle development (GO:0001541);; Biological Process: in utero embryonic development (GO:0001701);; Molecular Function: double-stranded DNA binding (GO:0003690);; Molecular Function: transcription …	K04377|8.6e-239|hsa:4609|K04377 Myc proto-oncogene protein | (RefSeq) MYC, MRTL, MYCC, bHLHe39, c-Myc; MYC proto-oncogene, bHLH transcription factor	MAPK signaling pathway (ko04010);; ErbB signaling pathway (ko04012);; Cell cycle (ko04110);; PI3K-Akt signaling pathway (ko04151);; Cellular senescence (ko04218);; Wnt signaling pathway (ko04310);; TGF-beta signaling pathway (ko04350);; Hippo signaling pathway (ko04390);; Signaling pathways regulating pluripotency of stem cells (ko04550);; JAK-STAT signaling pathway (ko04630);; Thyroid hormone si…	--	--	Myc amino-terminal region	Myc proto-oncogene protein OS=Homo sapiens OX=9606 GN=MYC PE=1 SV=1	K	Transcription	myc proto-oncogene protein isoform 1 [Homo sapiens]	biological process: biological regulation (GO:0065007);; biological process: cellular process (GO:0009987);; biological process: single-organism process (GO:0044699);; biological process: reproduction (GO:0000003);; biological process: reproductive process (GO:0022414);; biological process: multicellular organismal process (GO:0032501);; biological process: developmental process (GO:0032502);; bi…
ENSG00000141682	PMAIP1	3.985375	361	3.817478	268	3.778326	254	9.403192	707	8.543504	609	6.184014	462	2.61E-09	-1.148186059	down	--	--	Biological Process: release of cytochrome c from mitochondria (GO:0001836);; Biological Process: activation of cysteine-type endopeptidase activity involved in apoptotic process (GO:0006919);; Biological Process: cellular response to DNA damage stimulus (GO:0006974);;	K10131|5.4e-23|ggo:101152154|K10131 phorbol-12-myristate-13-acetate-induced protein 1 | (RefSeq) PMAIP1; phorbol-12-myristate-13-acetate-induced protein 1 isoform X2	Platinum drug resistance (ko01524);; p53 signaling pathway (ko04115);; Apoptosis (ko04210);; Apoptosis - multiple species (ko04215);; Pathways in cancer (ko05200);; Viral carcinogenesis (ko05203);; Colorectal cancer (ko05210)	--	--	Phorbol-12-myristate-13-acetate-induced	Phorbol-12-myristate-13-acetate-induced protein 1 OS=Homo sapiens OX=9606 GN=PMAIP1 PE=1 SV=1	K	Transcription	phorbol-12-myristate-13-acetate-induced protein 1 isoform 6 [Homo sapiens]	biological process: cellular process (GO:0009987);; biological process: single-organism process (GO:0044699);; biological process: cellular component organization or biogenesis (GO:0071840);; biological process: biological regulation (GO:0065007);; biological process: response to stimulus (GO:0050896)
Homo_sapiens_newGene_7912	--	1.174272	254	1.342534	232	1.146846	236	3.049891	597	2.787939	500	2.461081	386	3.73E-08	-1.147787443	down	--	--	--	--	--	--	--	--	--	--	--	--	--
ENSG00000172009	THOP1	11.474732	2358	9.040135	1441	11.541763	1715	18.930975	3477	19.653137	3307	23.008399	4110	5.45E-10	-1.147114532	down	[E]	Amino acid transport and metabolism	Molecular Function: metalloendopeptidase activity (GO:0004222);; Molecular Function: metal ion binding (GO:0046872);;	K01392|0.0e+00|hsa:7064|K01392 thimet oligopeptidase [EC:3.4.24.15] | (RefSeq) THOP1, EP24.15, MEPD_HUMAN, MP78, TOP; thimet oligopeptidase 1	Renin-angiotensin system (ko04614);; African trypanosomiasis (ko05143)	[O]	Posttranslational modification, protein turnover, chaperones	Peptidase family M3	Thimet oligopeptidase OS=Homo sapiens OX=9606 GN=THOP1 PE=1 SV=2	O	Posttranslational modification, protein turnover, chaperones	thimet oligopeptidase [Homo sapiens]	biological process: metabolic process (GO:0008152);; molecular function: catalytic activity (GO:0003824);; molecular function: binding (GO:0005488)
ENSG00000116273	PHF13	2.976164	512	4.083292	550	2.949977	380	6.151279	924	7.032979	957	7.259299	1024	8.14E-09	-1.147093681	down	--	--	Molecular Function: metal ion binding (GO:0046872);;	--	--	[R]	General function prediction only	PHD-finger	PHD finger protein 13 OS=Homo sapiens OX=9606 GN=PHF13 PE=1 SV=2	S	Function unknown	PHD finger protein 13 [Homo sapiens]	molecular function: binding (GO:0005488)
ENSG00000077514	POLD3	5.200346	795	6.541467	805	5.604853	619	13.82174	1923	12.404357	1579	8.216562	1053	6.03E-08	-1.145398817	down	--	--	Cellular Component: nucleoplasm (GO:0005654);; Biological Process: DNA replication (GO:0006260);; Cellular Component: delta DNA polymerase complex (GO:0043625);;	K03504|2.2e-229|hsa:10714|K03504 DNA polymerase delta subunit 3 | (RefSeq) POLD3, P66, P68, PPP1R128; DNA polymerase delta 3, accessory subunit	DNA replication (ko03030);; Base excision repair (ko03410);; Nucleotide excision repair (ko03420);; Mismatch repair (ko03430);; Homologous recombination (ko03440)	--	--	DNA polymerase subunit Cdc27	DNA polymerase delta subunit 3 OS=Homo sapiens OX=9606 GN=POLD3 PE=1 SV=2	L	Replication, recombination and repair	DNA polymerase delta subunit 3 isoform 1 [Homo sapiens]	cellular component: cell (GO:0005623);; cellular component: organelle (GO:0043226);; cellular component: organelle part (GO:0044422);; cellular component: cell part (GO:0044464);; biological process: metabolic process (GO:0008152);; biological process: cellular process (GO:0009987);; cellular component: membrane-enclosed lumen (GO:0031974);; cellular component: macromolecular complex (GO:0032991)
ENSG00000134291	TMEM106C	51.770439	3395	37.014869	1904	58.553661	2792	94.476304	5390	101.821563	5213	102.567332	5496	1.87E-09	-1.144440096	down	--	--	Cellular Component: integral component of membrane (GO:0016021);;	--	--	--	--	Protein of unknown function (DUF1356)	Transmembrane protein 106C OS=Homo sapiens OX=9606 GN=TMEM106C PE=1 SV=1	S	Function unknown	transmembrane protein 106C isoform a [Homo sapiens]	cellular component: membrane (GO:0016020);; cellular component: membrane part (GO:0044425)
ENSG00000278023	RDM1	1.097876	60	0.949375	44	0.463468	22	1.683531	90	1.800732	81	2.169185	99	0.00096828	-1.144315886	down	--	--	Molecular Function: RNA binding (GO:0003723);; Cellular Component: nucleolus (GO:0005730);; Cellular Component: cytosol (GO:0005829);;	K10874|2.4e-140|hsa:201299|K10874 RAD52 motif-containing protein 1 | (RefSeq) RDM1, RAD52B; RAD52 motif containing 1	--	--	--	RNA recognition motif. (a.k.a. RRM, RBD, or RNP domain)	RAD52 motif-containing protein 1 OS=Homo sapiens OX=9606 GN=RDM1 PE=1 SV=1	A	RNA processing and modification	RAD52 motif-containing protein 1 isoform 8 [Homo sapiens]	molecular function: binding (GO:0005488);; cellular component: cell (GO:0005623);; cellular component: organelle (GO:0043226);; cellular component: organelle part (GO:0044422);; cellular component: cell part (GO:0044464)
ENSG00000105329	TGFB1	0.312742	27	0.429378	18	0.30624	21	0.552447	56	0.457218	42	0.605362	52	0.002639817	-1.140874086	down	--	--	Biological Process: negative regulation of transcription from RNA polymerase II promoter (GO:0000122);; Biological Process: vasculogenesis (GO:0001570);; Biological Process: ureteric bud development (GO:0001657);; Biological Process: response to hypoxia (GO:0001666);; Biological Process: epithelial to mesenchymal transition (GO:0001837);; Biological Process: neural tube closure (GO:0001843);; Bio…	K13375|1.4e-229|ggo:101124474|K13375 transforming growth factor beta-1 | (RefSeq) TGFB1; transforming growth factor beta-1 proprotein isoform X2	MAPK signaling pathway (ko04010);; Cytokine-cytokine receptor interaction (ko04060);; FoxO signaling pathway (ko04068);; Cell cycle (ko04110);; Cellular senescence (ko04218);; TGF-beta signaling pathway (ko04350);; Osteoclast differentiation (ko04380);; Hippo signaling pathway (ko04390);; Th17 cell differentiation (ko04659);; Intestinal immune network for IgA production (ko04672);; Relaxin signal…	[T]	Signal transduction mechanisms	TGF-beta propeptide	Transforming growth factor beta-1 proprotein OS=Homo sapiens OX=9606 GN=TGFB1 PE=1 SV=2	T	Signal transduction mechanisms	transforming growth factor beta-1 proprotein preproprotein [Homo sapiens]	biological process: biological regulation (GO:0065007);; biological process: cellular process (GO:0009987);; biological process: developmental process (GO:0032502);; biological process: single-organism process (GO:0044699);; biological process: multicellular organismal process (GO:0032501);; biological process: response to stimulus (GO:0050896);; biological process: immune system process (GO:0002…
ENSG00000186193	SAPCD2	20.028229	3598	20.818281	2927	21.181311	2851	37.292789	5851	39.389214	5602	47.89941	7063	2.46E-11	-1.139951765	down	--	--	Biological Process: establishment of mitotic spindle orientation (GO:0000132);; Biological Process: microtubule cytoskeleton organization (GO:0000226);; Biological Process: mitotic cell cycle (GO:0000278);; Cellular Component: cellular_component (GO:0005575);; Cellular Component: intracellular (GO:0005622);; Cellular Component: cell (GO:0005623);; Cellular Component: nucleus (GO:0005634);; Cellul…	--	--	--	--	Adenomatous polyposis coli tumour suppressor protein	Suppressor APC domain-containing protein 2 OS=Homo sapiens OX=9606 GN=SAPCD2 PE=1 SV=2	S	Function unknown	suppressor APC domain-containing protein 2 [Homo sapiens]	biological process: cellular process (GO:0009987);; biological process: single-organism process (GO:0044699);; biological process: localization (GO:0051179);; biological process: cellular component organization or biogenesis (GO:0071840);; cellular component: cell (GO:0005623);; cellular component: cell part (GO:0044464);; cellular component: organelle (GO:0043226);; cellular component: organelle…
ENSG00000172005	MAL	0.804183	42	0.541319	22	0.926498	37	1.614801	74	1.631866	68	1.837192	79	0.001176717	-1.137890791	down	--	--	Biological Process: protein localization to paranode region of axon (GO:0002175);; Cellular Component: integral component of membrane (GO:0016021);; Cellular Component: extrinsic component of membrane (GO:0019898);; Molecular Function: structural constituent of myelin sheath (GO:0019911);; Biological Process: myelination (GO:0042552);; Cellular Component: plasma membrane raft (GO:0044853);; Biolo…	K19657|4.9e-21|dle:111187405|K19657 nephrocystin-1 | (RefSeq) NPHP1; nephrocystin-1 isoform X2	--	[V]	Defense mechanisms	Membrane-associating domain	Myelin and lymphocyte protein OS=Homo sapiens OX=9606 GN=MAL PE=1 SV=1	U	Intracellular trafficking, secretion, and vesicular transport	myelin and lymphocyte protein isoform a [Homo sapiens]	biological process: localization (GO:0051179);; cellular component: membrane (GO:0016020);; cellular component: membrane part (GO:0044425);; molecular function: structural molecule activity (GO:0005198);; biological process: cellular process (GO:0009987);; biological process: multicellular organismal process (GO:0032501);; biological process: developmental process (GO:0032502);; biological proces…
ENSG00000143321	HDGF	110.819569	12117	110.666354	9526	110.637236	9059	192.214898	18413	207.78655	18094	265.214129	23917	2.77E-10	-1.137786462	down	--	--	Biological Process: negative regulation of transcription from RNA polymerase II promoter (GO:0000122);; Molecular Function: transcription regulatory region sequence-specific DNA binding (GO:0000976);; Molecular Function: RNA polymerase II regulatory region sequence-specific DNA binding (GO:0000977);; Molecular Function: RNA polymerase II core promoter proximal region sequence-specific DNA binding…	K16641|6.8e-118|hsa:3068|K16641 hepatoma-derived growth factor | (RefSeq) HDGF, HMG1L2; heparin binding growth factor	--	[K]	Transcription	PWWP domain	Hepatoma-derived growth factor OS=Homo sapiens OX=9606 GN=HDGF PE=1 SV=1	K	Transcription	hepatoma-derived growth factor isoform a [Homo sapiens]	biological process: biological regulation (GO:0065007);; molecular function: binding (GO:0005488);; molecular function: nucleic acid binding transcription factor activity (GO:0001071);; molecular function: transcription factor activity, protein binding (GO:0000988);; cellular component: extracellular region (GO:0005576);; cellular component: extracellular region part (GO:0044421);; cellular compo…
Homo_sapiens_newGene_4276	--	1.666983	41	1.829086	35	2.598264	47	4.289254	91	5.437784	104	3.713984	74	0.000579782	-1.136296425	down	[J]	Translation, ribosomal structure and biogenesis	Molecular Function: structural constituent of ribosome (GO:0003735);; Cellular Component: ribosome (GO:0005840);; Biological Process: translation (GO:0006412);;	K02870|3.4e-72|aju:106965589|K02870 large subunit ribosomal protein L12e | (RefSeq) RPL12; 60S ribosomal protein L12	Ribosome (ko03010)	[J]	Translation, ribosomal structure and biogenesis	Ribosomal protein L11, RNA binding domain	60S ribosomal protein L12 OS=Homo sapiens OX=9606 GN=RPL12 PE=1 SV=1	J	Translation, ribosomal structure and biogenesis	60S ribosomal protein L12 [Macaca mulatta]	molecular function: structural molecule activity (GO:0005198);; cellular component: cell (GO:0005623);; cellular component: macromolecular complex (GO:0032991);; cellular component: organelle (GO:0043226);; cellular component: cell part (GO:0044464);; biological process: metabolic process (GO:0008152);; biological process: cellular process (GO:0009987)
ENSG00000120149	MSX2	19.221823	1950	16.387249	1292	15.345129	1158	31.715132	2795	34.340514	2794	34.978022	2945	3.58E-12	-1.136069377	down	--	--	Cellular Component: cytosol (GO:0005829);; Cellular Component: nuclear speck (GO:0016607);;	K09341|2.1e-144|ggo:101131683|K09341 homeobox protein MSX | (RefSeq) MSX2; homeobox protein MSX-2 isoform X1	Human T-cell leukemia virus 1 infection (ko05166)	[R]	General function prediction only	Homeodomain	Homeobox protein MSX-2 OS=Homo sapiens OX=9606 GN=MSX2 PE=1 SV=3	K	Transcription	homeobox protein MSX-2 isoform 1 [Homo sapiens]	cellular component: cell (GO:0005623);; cellular component: cell part (GO:0044464);; cellular component: membrane-enclosed lumen (GO:0031974);; cellular component: organelle (GO:0043226);; cellular component: organelle part (GO:0044422)
ENSG00000141510	TP53	31.853125	3879	27.557719	2640	33.688095	3069	57.217612	6151	57.433138	5584	70.423919	7099	1.14E-10	-1.134022172	down	--	--	Biological Process: negative regulation of transcription from RNA polymerase II promoter (GO:0000122);; Molecular Function: RNA polymerase II core promoter proximal region sequence-specific DNA binding (GO:0000978);; Molecular Function: transcriptional activator activity, RNA polymerase II transcription regulatory region sequence-specific binding (GO:0001228);; Biological Process: in utero embryo…	K04451|9.8e-187|hsa:7157|K04451 tumor protein p53 | (RefSeq) TP53, BCC7, BMFS5, LFS1, P53, TRP53; tumor protein p53	Endocrine resistance (ko01522);; Platinum drug resistance (ko01524);; MAPK signaling pathway (ko04010);; Sphingolipid signaling pathway (ko04071);; Cell cycle (ko04110);; p53 signaling pathway (ko04115);; Mitophagy - animal (ko04137);; PI3K-Akt signaling pathway (ko04151);; Apoptosis (ko04210);; Longevity regulating pathway (ko04211);; Ferroptosis (ko04216);; Cellular senescence (ko04218);; Wnt s…	--	--	P53 DNA-binding domain	Cellular tumor antigen p53 OS=Homo sapiens OX=9606 GN=TP53 PE=1 SV=4	B	Chromatin structure and dynamics	cellular tumor antigen p53 isoform b [Homo sapiens]	biological process: biological regulation (GO:0065007);; molecular function: binding (GO:0005488);; molecular function: nucleic acid binding transcription factor activity (GO:0001071);; biological process: multicellular organismal process (GO:0032501);; biological process: developmental process (GO:0032502);; biological process: single-organism process (GO:0044699);; biological process: cellular …
ENSG00000143228	NUF2	4.797496	435	6.506387	458	5.128101	342	13.127664	1034	12.925616	897	7.871918	591	2.52E-07	-1.13390346	down	--	--	Cellular Component: Ndc80 complex (GO:0031262);; Biological Process: cell division (GO:0051301);;	K11548|2.5e-233|csab:103230704|K11548 kinetochore protein Nuf2 | (RefSeq) NUF2; NUF2, NDC80 kinetochore complex component	--	[D]	Cell cycle control, cell division, chromosome partitioning	Nuf2 family	Kinetochore protein Nuf2 OS=Homo sapiens OX=9606 GN=NUF2 PE=1 SV=2	D	Cell cycle control, cell division, chromosome partitioning	kinetochore protein Nuf2 [Macaca mulatta]	cellular component: cell (GO:0005623);; cellular component: macromolecular complex (GO:0032991);; cellular component: organelle (GO:0043226);; cellular component: organelle part (GO:0044422);; cellular component: cell part (GO:0044464);; biological process: cellular process (GO:0009987);; biological process: single-organism process (GO:0044699)
ENSG00000137563	GGH	13.28246	997	14.291546	839	15.599381	877	28.36606	1859	30.363247	1804	27.468458	1692	6.53E-14	-1.132019655	down	--	--	Molecular Function: gamma-glutamyl-peptidase activity (GO:0034722);;	K01307|2.5e-184|hsa:8836|K01307 gamma-glutamyl hydrolase [EC:3.4.19.9] | (RefSeq) GGH, GH; gamma-glutamyl hydrolase	Folate biosynthesis (ko00790);; Antifolate resistance (ko01523)	[H]	Coenzyme transport and metabolism	Peptidase C26	Gamma-glutamyl hydrolase OS=Homo sapiens OX=9606 GN=GGH PE=1 SV=2	H	Coenzyme transport and metabolism	gamma-glutamyl hydrolase precursor [Homo sapiens]	biological process: metabolic process (GO:0008152);; molecular function: catalytic activity (GO:0003824)
ENSG00000164105	SAP30	6.236129	323	4.04671	164	6.317165	245	10.328586	467	11.417655	468	12.288603	522	1.18E-06	-1.131531889	down	--	--	Cellular Component: histone deacetylase complex (GO:0000118);; Biological Process: negative regulation of transcription from RNA polymerase II promoter (GO:0000122);; Cellular Component: nuclear chromosome (GO:0000228);; Cellular Component: chromatin (GO:0000785);; Cellular Component: nuclear chromatin (GO:0000790);; Molecular Function: molecular_function (GO:0003674);; Molecular Function: transc…	K19202|2.5e-106|ggo:101126980|K19202 histone deacetylase complex subunit SAP30 | (RefSeq) SAP30; histone deacetylase complex subunit SAP30 isoform X1	Epstein-Barr virus infection (ko05169)	--	--	SAP30 zinc-finger	Histone deacetylase complex subunit SAP30 OS=Homo sapiens OX=9606 GN=SAP30 PE=1 SV=1	K	Transcription	histone deacetylase complex subunit SAP30 [Homo sapiens]	cellular component: cell (GO:0005623);; cellular component: membrane-enclosed lumen (GO:0031974);; cellular component: macromolecular complex (GO:0032991);; cellular component: organelle (GO:0043226);; cellular component: organelle part (GO:0044422);; cellular component: cell part (GO:0044464);; biological process: biological regulation (GO:0065007);; molecular function: transcription factor acti…
Homo_sapiens_newGene_11971	--	1.840427	162	1.126092	78	1.546575	101	3.608938	277	3.128312	215	2.75738	196	1.41E-05	-1.12952835	down	--	--	--	--	--	--	--	--	--	--	--	--	--
ENSG00000177084	POLE	11.025574	4029	12.00207	3437	10.454957	2868	22.926802	7319	21.810866	6322	21.66058	6507	8.69E-17	-1.129123767	down	--	--	Molecular Function: DNA binding (GO:0003677);; Molecular Function: DNA-directed DNA polymerase activity (GO:0003887);; Biological Process: DNA replication (GO:0006260);; Biological Process: DNA repair (GO:0006281);; Cellular Component: epsilon DNA polymerase complex (GO:0008622);; Molecular Function: metal ion binding (GO:0046872);; Molecular Function: 4 iron, 4 sulfur cluster binding (GO:0051539…	K02324|2.1e-172|hsa:5426|K02324 DNA polymerase epsilon subunit 1 [EC:2.7.7.7] | (RefSeq) POLE, CRCS12, FILS, IMAGEI, POLE1; DNA polymerase epsilon, catalytic subunit	DNA replication (ko03030);; Base excision repair (ko03410);; Nucleotide excision repair (ko03420)	[L]	Replication, recombination and repair	DNA polymerase family B, exonuclease domain	DNA polymerase epsilon catalytic subunit A OS=Homo sapiens OX=9606 GN=POLE PE=1 SV=5	L	Replication, recombination and repair	POLE isoform 3 [Pan troglodytes]	molecular function: binding (GO:0005488);; biological process: metabolic process (GO:0008152);; biological process: cellular process (GO:0009987);; molecular function: catalytic activity (GO:0003824);; biological process: response to stimulus (GO:0050896);; cellular component: cell (GO:0005623);; cellular component: membrane-enclosed lumen (GO:0031974);; cellular component: macromolecular complex…
ENSG00000129255	MPDU1	63.105006	3567	48.999216	2405	67.633329	2873	105.272406	5031	118.447031	5397	170.282615	6956	1.50E-08	-1.129089933	down	--	--	Cellular Component: integral component of membrane (GO:0016021);;	K09660|2.7e-125|hsa:9526|K09660 mannose-P-dolichol utilization defect 1 | (RefSeq) MPDU1, CDGIF, HBEBP2BPA, Lec35, My008, PP3958, PQLC5, SL15, SLC66A5; mannose-P-dolichol utilization defect 1	--	[R]	General function prediction only	PQ loop repeat	Mannose-P-dolichol utilization defect 1 protein OS=Homo sapiens OX=9606 GN=MPDU1 PE=1 SV=2	S	Function unknown	mannose-P-dolichol utilization defect 1 protein isoform 1 [Homo sapiens]	cellular component: membrane (GO:0016020);; cellular component: membrane part (GO:0044425)
ENSG00000112877	CEP72	3.688083	420	5.56956	496	3.755896	320	8.258137	820	8.468902	762	9.627697	898	1.96E-07	-1.127245559	down	--	--	Cellular Component: centrosome (GO:0005813);; Biological Process: regulation of protein localization to centrosome (GO:1904779);;	K16532|0.0e+00|hsa:55722|K16532 centrosomal protein CEP72 | (RefSeq) CEP72; centrosomal protein 72	--	--	--	Leucine-rich repeat	Centrosomal protein of 72 kDa OS=Homo sapiens OX=9606 GN=CEP72 PE=1 SV=2	Z	Cytoskeleton	centrosomal protein of 72 kDa [Homo sapiens]	cellular component: cell (GO:0005623);; cellular component: organelle (GO:0043226);; cellular component: organelle part (GO:0044422);; cellular component: cell part (GO:0044464);; biological process: biological regulation (GO:0065007)
ENSG00000278259	MYO19	32.432758	5866	36.761017	5163	32.030889	4128	64.453017	10192	64.723361	9311	67.37423	9991	6.64E-15	-1.126286444	down	--	--	Molecular Function: motor activity (GO:0003774);; Molecular Function: actin binding (GO:0003779);; Molecular Function: ATP binding (GO:0005524);; Cellular Component: mitochondrion (GO:0005739);; Cellular Component: myosin complex (GO:0016459);;	K10357|1.4e-109|pss:102444310|K10357 myosin V | (RefSeq) unconventional myosin-Vb-like	--	[Z]	Cytoskeleton	Myosin head (motor domain)	Unconventional myosin-XIX OS=Homo sapiens OX=9606 GN=MYO19 PE=1 SV=2	Z	Cytoskeleton	unconventional myosin-XIX isoform 2 [Homo sapiens]	molecular function: catalytic activity (GO:0003824);; molecular function: binding (GO:0005488);; cellular component: cell (GO:0005623);; cellular component: organelle (GO:0043226);; cellular component: cell part (GO:0044464);; cellular component: macromolecular complex (GO:0032991);; cellular component: organelle part (GO:0044422)
ENSG00000149328	GLB1L2	0.234596	37	0.186153	23	0.160025	19	0.385582	53	0.597779	75	0.349955	46	0.003006233	-1.123851104	down	[G]	Carbohydrate transport and metabolism	Molecular Function: beta-galactosidase activity (GO:0004565);; Biological Process: carbohydrate metabolic process (GO:0005975);;	K12309|3.5e-113|oas:101112930|K12309 beta-galactosidase [EC:3.2.1.23] | (RefSeq) beta-galactosidase isoform X2	Galactose metabolism (ko00052);; Other glycan degradation (ko00511);; Glycosaminoglycan degradation (ko00531);; Sphingolipid metabolism (ko00600);; Glycosphingolipid biosynthesis - ganglio series (ko00604);; Lysosome (ko04142)	[G]	Carbohydrate transport and metabolism	Glycosyl hydrolases family 35	Beta-galactosidase-1-like protein 2 OS=Homo sapiens OX=9606 GN=GLB1L2 PE=1 SV=1	G	Carbohydrate transport and metabolism	beta-galactosidase-1-like protein 2 isoform b precursor [Homo sapiens]	molecular function: catalytic activity (GO:0003824);; biological process: metabolic process (GO:0008152)
ENSG00000174547	MRPL11	31.494345	1569	17.646284	1015	21.01226	1152	51.904991	2160	59.059638	2214	66.957092	2910	1.91E-08	-1.123451977	down	[J]	Translation, ribosomal structure and biogenesis	Molecular Function: structural constituent of ribosome (GO:0003735);; Cellular Component: ribosome (GO:0005840);; Biological Process: translation (GO:0006412);;	K02867|1.1e-97|hsa:65003|K02867 large subunit ribosomal protein L11 | (RefSeq) MRPL11, CGI-113, L11MT, MRP-L11; mitochondrial ribosomal protein L11	Ribosome (ko03010)	[J]	Translation, ribosomal structure and biogenesis	Ribosomal protein L11, N-terminal domain	39S ribosomal protein L11, mitochondrial OS=Homo sapiens OX=9606 GN=MRPL11 PE=1 SV=1	J	Translation, ribosomal structure and biogenesis	39S ribosomal protein L11, mitochondrial isoform a [Homo sapiens]	molecular function: structural molecule activity (GO:0005198);; cellular component: cell (GO:0005623);; cellular component: macromolecular complex (GO:0032991);; cellular component: organelle (GO:0043226);; cellular component: cell part (GO:0044464);; biological process: metabolic process (GO:0008152);; biological process: cellular process (GO:0009987)
ENSG00000165501	LRR1	7.363556	445	7.034194	350	5.721335	287	14.296449	767	12.909244	637	15.133774	705	1.61E-10	-1.122103323	down	--	--	Molecular Function: isomerase activity (GO:0016853);;	K10348|1.6e-47|ggo:101128313|K10348 LRR-repeat protein 1 | (RefSeq) LRR1; leucine-rich repeat protein 1 isoform X1	--	[R]	General function prediction only	--	Leucine-rich repeat protein 1 OS=Homo sapiens OX=9606 GN=LRR1 PE=1 SV=2	S	Function unknown	peptidylprolyl isomerase (cyclophilin)-like 5, isoform CRA_d [Homo sapiens]	molecular function: catalytic activity (GO:0003824)
ENSG00000169258	GPRIN1	6.174635	1214	6.962935	1071	5.661765	834	10.472739	1798	11.014885	1715	16.195774	2614	3.33E-07	-1.119711407	down	--	--	Molecular Function: molecular_function (GO:0003674);; Molecular Function: binding (GO:0005488);; Molecular Function: protein binding (GO:0005515);; Cellular Component: cellular_component (GO:0005575);; Cellular Component: cell (GO:0005623);; Cellular Component: plasma membrane (GO:0005886);; Biological Process: multicellular organism development (GO:0007275);; Biological Process: nervous system d…	--	--	--	--	G protein-regulated inducer of neurite outgrowth C-terminus	G protein-regulated inducer of neurite outgrowth 1 OS=Homo sapiens OX=9606 GN=GPRIN1 PE=1 SV=2	S	Function unknown	G protein-regulated inducer of neurite outgrowth 1 [Homo sapiens]	molecular function: binding (GO:0005488);; cellular component: cell (GO:0005623);; cellular component: membrane (GO:0016020);; cellular component: cell part (GO:0044464);; biological process: multicellular organismal process (GO:0032501);; biological process: developmental process (GO:0032502);; biological process: single-organism process (GO:0044699);; biological process: cellular process (GO:00…
ENSG00000118655	DCLRE1B	1.650648	273	2.61343	346	1.461909	195	3.571202	551	4.090889	541	3.821262	547	2.12E-06	-1.118582504	down	[L]	Replication, recombination and repair	Biological Process: cell cycle checkpoint (GO:0000075);; Cellular Component: nuclear chromosome (GO:0000228);; Biological Process: mitotic cell cycle (GO:0000278);; Biological Process: telomere maintenance (GO:0000723);; Biological Process: non-recombinational repair (GO:0000726);; Cellular Component: chromosome, telomeric region (GO:0000781);; Cellular Component: nuclear chromosome, telomeric re…	K15341|0.0e+00|hsa:64858|K15341 DNA cross-link repair 1B protein [EC:3.1.-.-] | (RefSeq) DCLRE1B, APOLLO, SNM1B, SNMIB; DNA cross-link repair 1B	--	[L]	Replication, recombination and repair	DNA repair metallo-beta-lactamase	5' exonuclease Apollo OS=Homo sapiens OX=9606 GN=DCLRE1B PE=1 SV=1	L	Replication, recombination and repair	5' exonuclease Apollo isoform a [Homo sapiens]	biological process: cellular process (GO:0009987);; biological process: biological regulation (GO:0065007);; cellular component: cell (GO:0005623);; cellular component: organelle (GO:0043226);; cellular component: organelle part (GO:0044422);; cellular component: cell part (GO:0044464);; biological process: single-organism process (GO:0044699);; biological process: metabolic process (GO:0008152);…
ENSG00000169684	CHRNA5	0.876894	139	1.157782	154	0.976984	116	1.504584	219	2.66519	345	1.987408	269	2.97E-05	-1.117812094	down	--	--	Molecular Function: transmembrane signaling receptor activity (GO:0004888);; Cellular Component: integral component of membrane (GO:0016021);; Molecular Function: acetylcholine-gated cation-selective channel activity (GO:0022848);; Cellular Component: postsynaptic membrane (GO:0045211);;	K04807|2.8e-269|hsa:1138|K04807 nicotinic acetylcholine receptor alpha-5 | (RefSeq) CHRNA5, LNCR2; cholinergic receptor nicotinic alpha 5 subunit	Neuroactive ligand-receptor interaction (ko04080)	[T]	Signal transduction mechanisms	Neurotransmitter-gated ion-channel ligand binding domain	Neuronal acetylcholine receptor subunit alpha-5 OS=Homo sapiens OX=9606 GN=CHRNA5 PE=1 SV=2	T	Signal transduction mechanisms	neuronal acetylcholine receptor subunit alpha-5 isoform 1 precursor [Homo sapiens]	biological process: cellular process (GO:0009987);; biological process: signaling (GO:0023052);; biological process: single-organism process (GO:0044699);; biological process: response to stimulus (GO:0050896);; biological process: biological regulation (GO:0065007);; molecular function: signal transducer activity (GO:0004871);; molecular function: molecular transducer activity (GO:0060089);; cel…
ENSG00000170345	FOS	0.335784	30	0.483361	37	0.089151	7	0.677185	60	1.076568	74	0.630911	45	0.010150921	-1.116773998	down	--	--	Molecular Function: RNA polymerase II core promoter proximal region sequence-specific DNA binding (GO:0000978);; Molecular Function: transcriptional activator activity, RNA polymerase II transcription regulatory region sequence-specific binding (GO:0001228);; Biological Process: conditioned taste aversion (GO:0001661);; Molecular Function: chromatin binding (GO:0003682);; Cellular Component: nucl…	K04379|8.1e-206|hsa:2353|K04379 proto-oncogene protein c-fos | (RefSeq) FOS, AP-1, C-FOS, p55; Fos proto-oncogene, AP-1 transcription factor subunit	Endocrine resistance (ko01522);; MAPK signaling pathway (ko04010);; cAMP signaling pathway (ko04024);; Apoptosis (ko04210);; Osteoclast differentiation (ko04380);; Toll-like receptor signaling pathway (ko04620);; IL-17 signaling pathway (ko04657);; Th1 and Th2 cell differentiation (ko04658);; Th17 cell differentiation (ko04659);; T cell receptor signaling pathway (ko04660);; B cell receptor signa…	[K]	Transcription	bZIP transcription factor	Proto-oncogene c-Fos OS=Homo sapiens OX=9606 GN=FOS PE=1 SV=1	K	Transcription	proto-oncogene c-Fos [Homo sapiens]	molecular function: binding (GO:0005488);; biological process: biological regulation (GO:0065007);; molecular function: nucleic acid binding transcription factor activity (GO:0001071);; biological process: behavior (GO:0007610);; biological process: multicellular organismal process (GO:0032501);; biological process: single-organism process (GO:0044699);; cellular component: cell (GO:0005623);; ce…
ENSG00000110108	TMEM109	42.281444	4757	44.691155	3936	40.307078	3398	76.007446	7478	77.322027	6892	97.792929	9038	1.61E-10	-1.115686798	down	--	--	Cellular Component: integral component of membrane (GO:0016021);; Biological Process: negative regulation of cell death (GO:0060548);; Biological Process: cellular response to gamma radiation (GO:0071480);;	--	--	--	--	Negative regulator of p53/TP53	Transmembrane protein 109 OS=Homo sapiens OX=9606 GN=TMEM109 PE=1 SV=1	U	Intracellular trafficking, secretion, and vesicular transport	transmembrane protein 109 precursor [Homo sapiens]	cellular component: membrane (GO:0016020);; cellular component: membrane part (GO:0044425);; biological process: biological regulation (GO:0065007);; biological process: cellular process (GO:0009987);; biological process: response to stimulus (GO:0050896)
Homo_sapiens_newGene_420	--	1.744617	104	2.854819	137	2.172162	104	5.22103	252	4.686522	225	4.983718	231	1.33E-05	-1.115621903	down	--	--	--	--	--	--	--	--	--	--	--	--	--
ENSG00000125450	NUP85	14.138316	1343	11.012743	820	12.344175	894	21.202587	1782	24.046796	1877	27.967641	2227	4.97E-09	-1.115595542	down	--	--	Biological Process: protein transport (GO:0015031);; Molecular Function: structural constituent of nuclear pore (GO:0017056);; Cellular Component: nuclear pore outer ring (GO:0031080);; Cellular Component: nuclear membrane (GO:0031965);; Biological Process: mRNA transport (GO:0051028);;	K14304|1.1e-85|hsa:79902|K14304 nuclear pore complex protein Nup85 | (RefSeq) NUP85, FROUNT, NPHS17, Nup75; nucleoporin 85	RNA transport (ko03013);; Amyotrophic lateral sclerosis (ko05014)	[YU]	Nuclear structure;; Intracellular trafficking, secretion, and vesicular transport	Nup85 Nucleoporin	Nuclear pore complex protein Nup85 OS=Homo sapiens OX=9606 GN=NUP85 PE=1 SV=1	--	--	NUP85 isoform 8 [Pan troglodytes]	biological process: localization (GO:0051179);; molecular function: structural molecule activity (GO:0005198);; cellular component: cell (GO:0005623);; cellular component: macromolecular complex (GO:0032991);; cellular component: organelle (GO:0043226);; cellular component: organelle part (GO:0044422);; cellular component: cell part (GO:0044464);; cellular component: membrane (GO:0016020)
ENSG00000167397	VKORC1	36.197848	1594	38.873085	1345	35.070431	1221	72.631426	2787	66.354871	2420	75.781029	2849	4.67E-13	-1.114153726	down	--	--	Molecular Function: serine-type endopeptidase activity (GO:0004252);; Cellular Component: endoplasmic reticulum (GO:0005783);; Biological Process: blood coagulation (GO:0007596);; Biological Process: peptidyl-glutamic acid carboxylation (GO:0017187);; Biological Process: vitamin K metabolic process (GO:0042373);; Molecular Function: vitamin-K-epoxide reductase (warfarin-sensitive) activity (GO:00…	K05357|9.8e-49|ggo:101127117|K05357 vitamin-K-epoxide reductase (warfarin-sensitive) [EC:1.17.4.4] | (RefSeq) VKORC1; vitamin K epoxide reductase complex subunit 1 isoform X1	Ubiquinone and other terpenoid-quinone biosynthesis (ko00130)	--	--	Vitamin K epoxide reductase family	Vitamin K epoxide reductase complex subunit 1 OS=Homo sapiens OX=9606 GN=VKORC1 PE=1 SV=1	--	--	MSTP134 [Homo sapiens]	biological process: metabolic process (GO:0008152);; molecular function: catalytic activity (GO:0003824);; cellular component: cell (GO:0005623);; cellular component: organelle (GO:0043226);; cellular component: cell part (GO:0044464);; biological process: multicellular organismal process (GO:0032501);; biological process: single-organism process (GO:0044699);; biological process: biological regu…
ENSG00000197785	ATAD3A	15.591178	1779	15.057571	1362	15.026896	1295	26.536673	2688	28.245057	2587	34.688378	3294	2.72E-10	-1.113690596	down	[R]	General function prediction only	Molecular Function: ATP binding (GO:0005524);; Cellular Component: mitochondrion (GO:0005739);; Biological Process: mitochondrion organization (GO:0007005);;	K17681|0.0e+00|hsa:55210|K17681 ATPase family AAA domain-containing protein 3A/B | (RefSeq) ATAD3A, HAYOS, PHRINL; ATPase family AAA domain containing 3A	--	[O]	Posttranslational modification, protein turnover, chaperones	Domain of unknown function (DUF3523)	ATPase family AAA domain-containing protein 3A OS=Homo sapiens OX=9606 GN=ATAD3A PE=1 SV=2	O	Posttranslational modification, protein turnover, chaperones	ATPase family AAA domain-containing protein 3A isoform 1 [Homo sapiens]	molecular function: binding (GO:0005488);; cellular component: cell (GO:0005623);; cellular component: organelle (GO:0043226);; cellular component: cell part (GO:0044464);; biological process: cellular process (GO:0009987);; biological process: cellular component organization or biogenesis (GO:0071840)
ENSG00000116237	ICMT	17.202738	3487	15.817338	2717	16.57353	2495	29.697638	5324	34.232903	5559	34.578815	5821	5.95E-14	-1.113313267	down	[O]	Posttranslational modification, protein turnover, chaperones	Molecular Function: protein C-terminal S-isoprenylcysteine carboxyl O-methyltransferase activity (GO:0004671);; Cellular Component: endoplasmic reticulum membrane (GO:0005789);; Cellular Component: integral component of membrane (GO:0016021);;	K00587|7.7e-161|hsa:23463|K00587 protein-S-isoprenylcysteine O-methyltransferase [EC:2.1.1.100] | (RefSeq) ICMT, HSTE14, MST098, MSTP098, PCCMT, PCMT, PPMT; isoprenylcysteine carboxyl methyltransferase	Terpenoid backbone biosynthesis (ko00900)	[O]	Posttranslational modification, protein turnover, chaperones	Isoprenylcysteine carboxyl methyltransferase (ICMT) family	Protein-S-isoprenylcysteine O-methyltransferase OS=Homo sapiens OX=9606 GN=ICMT PE=1 SV=1	O	Posttranslational modification, protein turnover, chaperones	protein-S-isoprenylcysteine O-methyltransferase [Homo sapiens]	biological process: metabolic process (GO:0008152);; biological process: cellular process (GO:0009987);; molecular function: catalytic activity (GO:0003824);; cellular component: cell (GO:0005623);; cellular component: membrane (GO:0016020);; cellular component: organelle (GO:0043226);; cellular component: organelle part (GO:0044422);; cellular component: membrane part (GO:0044425);; cellular com…
ENSG00000169679	BUB1	6.832222	1120	7.592453	974	6.3647	782	16.757201	2397	15.464421	2005	9.701432	1305	4.38E-08	-1.113140165	down	--	--	Molecular Function: protein kinase activity (GO:0004672);; Molecular Function: ATP binding (GO:0005524);; Biological Process: mitotic spindle assembly checkpoint (GO:0007094);;	K02178|0.0e+00|hsa:699|K02178 checkpoint serine/threonine-protein kinase [EC:2.7.11.1] | (RefSeq) BUB1, BUB1A, BUB1L, hBUB1; BUB1 mitotic checkpoint serine/threonine kinase	Cell cycle (ko04110);; Oocyte meiosis (ko04114);; Progesterone-mediated oocyte maturation (ko04914)	[D]	Cell cycle control, cell division, chromosome partitioning	Mad3/BUB1 homology region 1	Mitotic checkpoint serine/threonine-protein kinase BUB1 OS=Homo sapiens OX=9606 GN=BUB1 PE=1 SV=1	D	Cell cycle control, cell division, chromosome partitioning	mitotic checkpoint serine/threonine-protein kinase BUB1 isoform 2 [Homo sapiens]	biological process: metabolic process (GO:0008152);; biological process: cellular process (GO:0009987);; molecular function: catalytic activity (GO:0003824);; molecular function: binding (GO:0005488);; biological process: single-organism process (GO:0044699);; biological process: biological regulation (GO:0065007)
ENSG00000147889	CDKN2A	2.923968	167	1.950446	90	3.582869	148	6.07451	305	4.095727	190	6.89164	333	0.000130831	-1.112403444	down	--	--	Biological Process: apoptotic process (GO:0006915);; Biological Process: cell cycle arrest (GO:0007050);; Biological Process: negative regulation of cell proliferation (GO:0008285);;	K06621|2.2e-62|csab:103219354|K06621 cyclin-dependent kinase inhibitor 2A | (RefSeq) cyclin-dependent kinase inhibitor 2A, isoform 4	Endocrine resistance (ko01522);; Platinum drug resistance (ko01524);; Cell cycle (ko04110);; p53 signaling pathway (ko04115);; Cellular senescence (ko04218);; Cushing syndrome (ko04934);; Human cytomegalovirus infection (ko05163);; Human T-cell leukemia virus 1 infection (ko05166);; Pathways in cancer (ko05200);; Viral carcinogenesis (ko05203);; MicroRNAs in cancer (ko05206);; Pancreatic cancer (…	--	--	Cyclin-dependent kinase inhibitor 2a p19Arf N-terminus	Tumor suppressor ARF OS=Homo sapiens OX=9606 GN=CDKN2A PE=1 SV=2	K	Transcription	cyclin-dependent kinase inhibitor 2A isoform p14ARF [Homo sapiens]	biological process: cellular process (GO:0009987);; biological process: single-organism process (GO:0044699);; biological process: biological regulation (GO:0065007)
ENSG00000198055	GRK6	18.131686	2305	20.010294	1871	18.054438	1700	34.196851	3667	31.673403	3317	42.222491	4373	2.22E-10	-1.111450979	down	[T]	Signal transduction mechanisms	Molecular Function: G-protein coupled receptor kinase activity (GO:0004703);; Molecular Function: ATP binding (GO:0005524);; Biological Process: signal transduction (GO:0007165);;	K08291|0.0e+00|hsa:2870|K08291 G protein-coupled receptor kinase [EC:2.7.11.16] | (RefSeq) GRK6, GPRK6; G protein-coupled receptor kinase 6	Chemokine signaling pathway (ko04062);; Endocytosis (ko04144);; Morphine addiction (ko05032)	[T]	Signal transduction mechanisms	Protein kinase domain	G protein-coupled receptor kinase 6 OS=Homo sapiens OX=9606 GN=GRK6 PE=1 SV=2	T	Signal transduction mechanisms	G protein-coupled receptor kinase 6 isoform A [Homo sapiens]	biological process: metabolic process (GO:0008152);; biological process: cellular process (GO:0009987);; molecular function: catalytic activity (GO:0003824);; molecular function: binding (GO:0005488);; biological process: biological regulation (GO:0065007)
ENSG00000243927	MRPS6	17.91979	829	13.936451	504	16.840364	584	29.30459	1183	30.710987	1124	36.645676	1391	8.83E-09	-1.111445251	down	--	--	Cellular Component: organellar ribosome (GO:0000313);; Cellular Component: organellar small ribosomal subunit (GO:0000314);; Molecular Function: molecular_function (GO:0003674);; Molecular Function: nucleic acid binding (GO:0003676);; Molecular Function: RNA binding (GO:0003723);; Molecular Function: structural constituent of ribosome (GO:0003735);; Molecular Function: structural molecule activit…	K02990|5.0e-64|hsa:64968|K02990 small subunit ribosomal protein S6 | (RefSeq) MRPS6, C21orf101, MRP-S6, RPMS6, S6mt; mitochondrial ribosomal protein S6	Ribosome (ko03010)	[J]	Translation, ribosomal structure and biogenesis	Ribosomal protein S6	28S ribosomal protein S6, mitochondrial OS=Homo sapiens OX=9606 GN=MRPS6 PE=1 SV=3	J	Translation, ribosomal structure and biogenesis	28S ribosomal protein S6, mitochondrial [Pan troglodytes]	cellular component: cell (GO:0005623);; cellular component: macromolecular complex (GO:0032991);; cellular component: organelle (GO:0043226);; cellular component: organelle part (GO:0044422);; cellular component: cell part (GO:0044464);; molecular function: binding (GO:0005488);; molecular function: structural molecule activity (GO:0005198);; cellular component: membrane (GO:0016020);; cellular c…
ENSG00000095059	DHPS	22.41946	1161	22.239802	911	21.022472	837	33.818628	1524	40.309724	1847	52.715202	2271	8.04E-08	-1.111018929	down	[OJ]	Posttranslational modification, protein turnover, chaperones;; Translation, ribosomal structure and biogenesis	Biological Process: peptidyl-lysine modification to peptidyl-hypusine (GO:0008612);;	K00809|7.8e-214|hsa:1725|K00809 deoxyhypusine synthase [EC:2.5.1.46] | (RefSeq) DHPS, DHS, DS, MIG13, NEDSSWI; deoxyhypusine synthase	--	[O]	Posttranslational modification, protein turnover, chaperones	Deoxyhypusine synthase	Deoxyhypusine synthase OS=Homo sapiens OX=9606 GN=DHPS PE=1 SV=1	O	Posttranslational modification, protein turnover, chaperones	deoxyhypusine synthase isoform a [Homo sapiens]	biological process: metabolic process (GO:0008152);; biological process: cellular process (GO:0009987)
ENSG00000151224	MAT1A	1.203039	192	0.350211	44	0.881797	106	1.612408	224	1.781281	226	1.909468	249	0.001285838	-1.107324625	down	[H]	Coenzyme transport and metabolism	Molecular Function: methionine adenosyltransferase activity (GO:0004478);; Molecular Function: ATP binding (GO:0005524);; Biological Process: S-adenosylmethionine biosynthetic process (GO:0006556);; Biological Process: one-carbon metabolic process (GO:0006730);; Molecular Function: metal ion binding (GO:0046872);;	K00789|8.3e-230|ggo:101149660|K00789 S-adenosylmethionine synthetase [EC:2.5.1.6] | (RefSeq) MAT1A; S-adenosylmethionine synthase isoform X1	Cysteine and methionine metabolism (ko00270);; Biosynthesis of amino acids (ko01230)	[H]	Coenzyme transport and metabolism	S-adenosylmethionine synthetase, C-terminal domain	S-adenosylmethionine synthase isoform type-1 OS=Homo sapiens OX=9606 GN=MAT1A PE=1 SV=2	H	Coenzyme transport and metabolism	S-adenosylmethionine synthase isoform type-1 [Homo sapiens]	molecular function: catalytic activity (GO:0003824);; molecular function: binding (GO:0005488);; biological process: metabolic process (GO:0008152);; biological process: cellular process (GO:0009987);; biological process: single-organism process (GO:0044699)
ENSG00000102034	ELF4	0.728947	140	1.036923	157	0.647225	95	1.261388	215	1.642694	246	2.086199	329	8.78E-05	-1.105690743	down	--	--	Molecular Function: RNA polymerase II transcription factor activity, sequence-specific DNA binding (GO:0000981);; Biological Process: natural killer cell proliferation (GO:0001787);; Biological Process: NK T cell proliferation (GO:0001866);; Cellular Component: nucleoplasm (GO:0005654);; Cellular Component: nuclear body (GO:0016604);; Molecular Function: sequence-specific DNA binding (GO:0043565)…	K09428|0.0e+00|hsa:2000|K09428 E74-like factor 1/2/4 | (RefSeq) ELF4, ELFR, MEF; E74 like ETS transcription factor 4	--	[K]	Transcription	Ets-domain	ETS-related transcription factor Elf-4 OS=Homo sapiens OX=9606 GN=ELF4 PE=1 SV=1	K	Transcription	ETS-related transcription factor Elf-4 [Homo sapiens]	biological process: biological regulation (GO:0065007);; molecular function: nucleic acid binding transcription factor activity (GO:0001071);; biological process: immune system process (GO:0002376);; biological process: cellular process (GO:0009987);; biological process: single-organism process (GO:0044699);; cellular component: cell (GO:0005623);; cellular component: organelle (GO:0043226);; cel…
ENSG00000186777	ZNF732	0.748767	77	1.136785	91	0.807409	63	2.098	188	1.962496	159	1.503788	127	8.21E-05	-1.101152063	down	--	--	Molecular Function: nucleic acid binding (GO:0003676);; Biological Process: regulation of transcription, DNA-templated (GO:0006355);; Molecular Function: metal ion binding (GO:0046872);;	K09228|1.8e-116|ptr:100609994|K09228 KRAB domain-containing zinc finger protein | (RefSeq) ZNF732; LOW QUALITY PROTEIN: zinc finger protein 732	Herpes simplex virus 1 infection (ko05168)	[R]	General function prediction only	Zinc-finger double domain	Zinc finger protein 732 OS=Homo sapiens OX=9606 GN=ZNF732 PE=2 SV=1	K	Transcription	zinc finger protein 732 [Homo sapiens]	molecular function: binding (GO:0005488);; biological process: biological regulation (GO:0065007)
ENSG00000138030	KHK	6.511985	733	5.04799	445	5.253538	444	10.415838	1025	11.292653	1007	11.322196	1046	7.22E-10	-1.099335814	down	[G]	Carbohydrate transport and metabolism	Molecular Function: ketohexokinase activity (GO:0004454);; Biological Process: fructose metabolic process (GO:0006000);; Biological Process: response to sucrose (GO:0009744);; Biological Process: response to glucose (GO:0009749);; Biological Process: response to fructose (GO:0009750);; Biological Process: response to zinc ion (GO:0010043);; Biological Process: response to insulin (GO:0032868);;	K00846|2.4e-168|hsa:3795|K00846 ketohexokinase [EC:2.7.1.3] | (RefSeq) KHK; ketohexokinase	Fructose and mannose metabolism (ko00051)	[G]	Carbohydrate transport and metabolism	pfkB family carbohydrate kinase	Ketohexokinase OS=Homo sapiens OX=9606 GN=KHK PE=1 SV=2	G	Carbohydrate transport and metabolism	ketohexokinase isoform a [Homo sapiens]	biological process: metabolic process (GO:0008152);; biological process: cellular process (GO:0009987);; molecular function: catalytic activity (GO:0003824);; biological process: single-organism process (GO:0044699);; biological process: response to stimulus (GO:0050896)
ENSG00000143401	ANP32E	1.787234	281	1.695557	214	1.601296	194	4.448228	599	3.56988	448	2.414697	317	1.68E-06	-1.098923189	down	--	--	Cellular Component: nuclear chromosome (GO:0000228);; Cellular Component: chromatin (GO:0000785);; Cellular Component: nuclear chromatin (GO:0000790);; Cellular Component: Swr1 complex (GO:0000812);; Molecular Function: molecular_function (GO:0003674);; Molecular Function: enzyme inhibitor activity (GO:0004857);; Molecular Function: binding (GO:0005488);; Molecular Function: protein binding (GO:0…	K18648|5.1e-98|hsa:81611|K18648 acidic leucine-rich nuclear phosphoprotein 32 family member E | (RefSeq) ANP32E, LANP-L, LANPL; acidic nuclear phosphoprotein 32 family member E	--	[DR]	Cell cycle control, cell division, chromosome partitioning;; General function prediction only	Leucine Rich repeats (2 copies)	Acidic leucine-rich nuclear phosphoprotein 32 family member E OS=Homo sapiens OX=9606 GN=ANP32E PE=1 SV=1	D	Cell cycle control, cell division, chromosome partitioning	acidic leucine-rich nuclear phosphoprotein 32 family member E isoform 1 [Homo sapiens]	cellular component: cell (GO:0005623);; cellular component: organelle (GO:0043226);; cellular component: organelle part (GO:0044422);; cellular component: cell part (GO:0044464);; cellular component: membrane-enclosed lumen (GO:0031974);; cellular component: macromolecular complex (GO:0032991);; biological process: biological regulation (GO:0065007);; molecular function: molecular function regula…
ENSG00000061337	LZTS1	0.317122	85	0.431189	89	0.383101	77	0.739355	172	0.764306	161	0.788082	171	2.03E-05	-1.09799111	down	--	--	Molecular Function: molecular_function (GO:0003674);; Molecular Function: nucleic acid binding (GO:0003676);; Molecular Function: DNA binding (GO:0003677);; Molecular Function: transcription factor activity, sequence-specific DNA binding (GO:0003700);; Molecular Function: binding (GO:0005488);; Cellular Component: cellular_component (GO:0005575);; Cellular Component: cell (GO:0005623);; Cellular …	--	--	--	--	Fez1	Leucine zipper putative tumor suppressor 1 OS=Homo sapiens OX=9606 GN=LZTS1 PE=1 SV=3	K	Transcription	leucine zipper putative tumor suppressor 1 [Homo sapiens]	molecular function: binding (GO:0005488);; biological process: biological regulation (GO:0065007);; molecular function: nucleic acid binding transcription factor activity (GO:0001071);; cellular component: cell (GO:0005623);; cellular component: membrane (GO:0016020);; cellular component: cell part (GO:0044464);; biological process: metabolic process (GO:0008152);; biological process: cellular pr…
ENSG00000127337	YEATS4	9.505289	616	8.623131	438	9.79523	489	15.937748	903	21.168949	1104	17.826096	958	2.09E-09	-1.09727332	down	--	--	Cellular Component: nucleus (GO:0005634);; Biological Process: regulation of transcription, DNA-templated (GO:0006355);;	K11341|1.6e-124|cjc:100394047|K11341 YEATS domain-containing protein 4 | (RefSeq) YEATS4; YEATS domain containing 4	--	[K]	Transcription	YEATS family	YEATS domain-containing protein 4 OS=Homo sapiens OX=9606 GN=YEATS4 PE=1 SV=1	K	Transcription	YEATS domain-containing protein 4 isoform 1 [Homo sapiens]	cellular component: cell (GO:0005623);; cellular component: organelle (GO:0043226);; cellular component: cell part (GO:0044464);; biological process: biological regulation (GO:0065007)
ENSG00000148346	LCN2	15.103893	579	12.559919	378	16.324986	471	26.022213	874	24.225686	740	36.897455	1164	1.75E-06	-1.09723888	down	--	--	Molecular Function: small molecule binding (GO:0036094);;	K21129|6.0e-112|hsa:3934|K21129 lipocalin 2 | (RefSeq) LCN2, 24p3, MSFI, NGAL, p25; lipocalin 2	IL-17 signaling pathway (ko04657)	--	--	Lipocalin / cytosolic fatty-acid binding protein family	Neutrophil gelatinase-associated lipocalin OS=Homo sapiens OX=9606 GN=LCN2 PE=1 SV=2	W	Extracellular structures	neutrophil gelatinase-associated lipocalin precursor [Homo sapiens]	molecular function: binding (GO:0005488)
ENSG00000133119	RFC3	8.682371	966	9.040061	789	7.86205	648	18.430013	1744	21.567136	1838	12.509779	1092	5.95E-08	-1.095985581	down	[L]	Replication, recombination and repair	Molecular Function: DNA binding (GO:0003677);; Biological Process: DNA replication (GO:0006260);;	K10756|7.1e-204|fca:101081597|K10756 replication factor C subunit 3/5 | (RefSeq) RFC3; replication factor C subunit 3 isoform X1	DNA replication (ko03030);; Nucleotide excision repair (ko03420);; Mismatch repair (ko03430)	[DL]	Cell cycle control, cell division, chromosome partitioning;; Replication, recombination and repair	DNA polymerase III, delta subunit	Replication factor C subunit 3 OS=Homo sapiens OX=9606 GN=RFC3 PE=1 SV=2	L	Replication, recombination and repair	replication factor C subunit 3 isoform 1 [Homo sapiens]	molecular function: binding (GO:0005488);; biological process: metabolic process (GO:0008152);; biological process: cellular process (GO:0009987)
ENSG00000177096	PHETA2	2.108348	224	2.237084	190	2.342935	173	4.004046	364	3.86771	335	5.098836	443	7.03E-07	-1.095196082	down	--	--	Biological Process: receptor recycling (GO:0001881);; Molecular Function: molecular_function (GO:0003674);; Molecular Function: binding (GO:0005488);; Molecular Function: protein binding (GO:0005515);; Cellular Component: cellular_component (GO:0005575);; Cellular Component: intracellular (GO:0005622);; Cellular Component: cell (GO:0005623);; Cellular Component: cytoplasm (GO:0005737);; Cellular …	K23791|1.6e-149|hsa:150368|K23791 sesquipedalian | (RefSeq) PHETA2, FAM109B, IPIP27B, Ses2; PH domain containing endocytic trafficking adaptor 2	--	--	--	PH domain	Sesquipedalian-2 OS=Homo sapiens OX=9606 GN=PHETA2 PE=1 SV=1	U	Intracellular trafficking, secretion, and vesicular transport	sesquipedalian-2 [Homo sapiens]	biological process: metabolic process (GO:0008152);; biological process: cellular process (GO:0009987);; molecular function: binding (GO:0005488);; cellular component: cell (GO:0005623);; cellular component: cell part (GO:0044464);; cellular component: organelle (GO:0043226);; cellular component: organelle part (GO:0044422);; biological process: localization (GO:0051179);; biological process: cel…
ENSG00000005189	REXO5	2.465429	289	2.15484	197	1.972411	174	4.305386	446	4.538891	433	4.12332	384	1.77E-08	-1.094553751	down	--	--	Molecular Function: RNA binding (GO:0003723);; Molecular Function: exonuclease activity (GO:0004527);;	K14570|0.0e+00|hsa:81691|K14570 RNA exonuclease 1 [EC:3.1.-.-] | (RefSeq) REXO5, NEF-sp; RNA exonuclease 5	Ribosome biogenesis in eukaryotes (ko03008)	[L]	Replication, recombination and repair	RNA recognition motif. (a.k.a. RRM, RBD, or RNP domain)	RNA exonuclease 5 OS=Homo sapiens OX=9606 GN=REXO5 PE=2 SV=1	L	Replication, recombination and repair	RNA exonuclease 5 isoform 1 [Homo sapiens]	molecular function: binding (GO:0005488);; biological process: metabolic process (GO:0008152);; biological process: cellular process (GO:0009987);; molecular function: catalytic activity (GO:0003824)
ENSG00000100473	COCH	0.987971	120	0.891456	94	1.063696	103	2.327968	258	1.660722	172	1.878668	200	1.03E-05	-1.091284735	down	--	--	Biological Process: sensory perception of sound (GO:0007605);; Biological Process: defense response to bacterium (GO:0042742);; Biological Process: positive regulation of innate immune response (GO:0045089);;	K23574|0.0e+00|ggo:101141969|K23574 cochlin | (RefSeq) COCH; cochlin isoform X1	--	[WV]	Extracellular structures;; Defense mechanisms	von Willebrand factor type A domain	Cochlin OS=Homo sapiens OX=9606 GN=COCH PE=1 SV=1	--	--	cochlin isoform b precursor [Homo sapiens]	biological process: multicellular organismal process (GO:0032501);; biological process: response to stimulus (GO:0050896);; biological process: multi-organism process (GO:0051704);; biological process: biological regulation (GO:0065007)
Homo_sapiens_newGene_12017	--	4.197596	216	3.622972	146	4.645082	179	6.869873	308	8.329293	339	9.621709	404	3.60E-06	-1.089753765	down	--	--	--	K13784|3.8e-11|tup:102502543|K13784 prothymosin alpha | (RefSeq) prothymosin alpha	--	--	--	Prothymosin/parathymosin family	Prothymosin alpha OS=Homo sapiens OX=9606 GN=PTMA PE=1 SV=2	S	Function unknown	open reading frame A [Homo sapiens]	--
ENSG00000196550	FAM72A	0.628808	71	1.254417	108	0.963826	79	2.109768	206	2.203566	195	1.503248	137	0.000253879	-1.089450885	down	--	--	Cellular Component: cellular_component (GO:0005575);; Cellular Component: intracellular (GO:0005622);; Cellular Component: cell (GO:0005623);; Cellular Component: cytoplasm (GO:0005737);; Cellular Component: cytosol (GO:0005829);; Cellular Component: organelle (GO:0043226);; Cellular Component: membrane-bounded organelle (GO:0043227);; Cellular Component: intracellular organelle (GO:0043229);; Ce…	--	--	--	--	FAM72 protein	Protein FAM72A OS=Homo sapiens OX=9606 GN=FAM72A PE=1 SV=1	S	Function unknown	protein FAM72A isoform 1 [Homo sapiens]	cellular component: cell (GO:0005623);; cellular component: cell part (GO:0044464);; cellular component: organelle (GO:0043226)
ENSG00000213626	LBH	2.180344	315	1.484214	168	2.432485	257	3.466754	438	4.20227	481	4.311552	512	4.05E-06	-1.086518277	down	--	--	Biological Process: regulation of transcription, DNA-templated (GO:0006355);;	--	--	--	--	Cardiac transcription factor regulator, Developmental protein	Protein LBH OS=Homo sapiens OX=9606 GN=LBH PE=1 SV=1	K	Transcription	protein LBH [Homo sapiens]	biological process: biological regulation (GO:0065007)
ENSG00000167550	RHEBL1	0.277805	17	0.72775	33	0.146506	7	1.112156	54	0.804517	38	1.099926	49	0.014925232	-1.086199882	down	--	--	--	K07849|8.1e-08|cge:100765176|K07849 Ras homolog enriched in brain like 1 | (RefSeq) Rhebl1; GTPase RhebL1 isoform X1	--	--	--	--	--	--	--	RHEBL1 isoform 1 [Pan troglodytes]	--
ENSG00000125835	SNRPB	193.211798	9927	175.691179	7214	193.046459	7475	316.914412	14331	336.730582	13791	438.474736	18530	3.14E-09	-1.085671265	down	--	--	Molecular Function: RNA binding (GO:0003723);; Cellular Component: nucleoplasm (GO:0005654);;	K11086|1.8e-99|aml:100466329|K11086 small nuclear ribonucleoprotein B and B' | (RefSeq) SNRPB; small nuclear ribonucleoprotein-associated proteins B and B' isoform X2	Spliceosome (ko03040);; Systemic lupus erythematosus (ko05322)	[K]	Transcription	LSM domain	Small nuclear ribonucleoprotein-associated proteins B and B' OS=Homo sapiens OX=9606 GN=SNRPB PE=1 SV=2	A	RNA processing and modification	PREDICTED: LOW QUALITY PROTEIN: small nuclear ribonucleoprotein-associated proteins B and B' [Rhinopithecus bieti]	molecular function: binding (GO:0005488);; cellular component: cell (GO:0005623);; cellular component: organelle (GO:0043226);; cellular component: organelle part (GO:0044422);; cellular component: cell part (GO:0044464)
ENSG00000112576	CCND3	10.62498	1009	9.012669	673	8.772805	632	17.598357	1461	17.711426	1342	20.016472	1545	1.71E-10	-1.08518525	down	--	--	Cellular Component: nucleoplasm (GO:0005654);; Cellular Component: cytosol (GO:0005829);; Cellular Component: nuclear body (GO:0016604);; Cellular Component: host cell nucleus (GO:0042025);;	K10152|1.9e-111|hsa:896|K10152 G1/S-specific cyclin-D3 | (RefSeq) CCND3; cyclin D3	Cell cycle (ko04110);; p53 signaling pathway (ko04115);; PI3K-Akt signaling pathway (ko04151);; Cellular senescence (ko04218);; Wnt signaling pathway (ko04310);; Hippo signaling pathway (ko04390);; Focal adhesion (ko04510);; JAK-STAT signaling pathway (ko04630);; Measles (ko05162);; Influenza A (ko05164);; Human papillomavirus infection (ko05165);; Human T-cell leukemia virus 1 infection (ko05166…	[D]	Cell cycle control, cell division, chromosome partitioning	Cyclin, N-terminal domain	G1/S-specific cyclin-D3 OS=Homo sapiens OX=9606 GN=CCND3 PE=1 SV=2	D	Cell cycle control, cell division, chromosome partitioning	G1/S-specific cyclin-D3 isoform 5 [Homo sapiens]	cellular component: cell (GO:0005623);; cellular component: organelle (GO:0043226);; cellular component: organelle part (GO:0044422);; cellular component: cell part (GO:0044464);; cellular component: membrane-enclosed lumen (GO:0031974);; cellular component: other organism (GO:0044215);; cellular component: other organism part (GO:0044217)
ENSG00000141858	SAMD1	11.599701	1172	11.093287	877	11.378976	862	20.411501	1801	20.823902	1666	24.454557	2028	1.14E-10	-1.082134729	down	--	--	Molecular Function: protein binding (GO:0005515);;	K04431|1.8e-15|gfr:102038813|K04431 mitogen-activated protein kinase kinase 7 [EC:2.7.12.2] | (RefSeq) MAP2K7; mitogen-activated protein kinase kinase 7	MAPK signaling pathway (ko04010);; ErbB signaling pathway (ko04012);; Protein processing in endoplasmic reticulum (ko04141);; Tight junction (ko04530);; Toll-like receptor signaling pathway (ko04620);; GnRH signaling pathway (ko04912);; Salmonella infection (ko05132)	--	--	SAM domain (Sterile alpha motif)	Atherin OS=Homo sapiens OX=9606 GN=SAMD1 PE=1 SV=1	B	Chromatin structure and dynamics	SAMD1 isoform 3 [Pongo abelii]	molecular function: binding (GO:0005488)
ENSG00000213988	ZNF90	0.477471	47	0.684	52	0.571841	40	1.550738	123	1.228572	89	1.01768	77	0.000681454	-1.082022967	down	--	--	Molecular Function: nucleic acid binding (GO:0003676);; Biological Process: regulation of transcription, DNA-templated (GO:0006355);; Molecular Function: metal ion binding (GO:0046872);;	K09228|5.7e-97|hsa:7643|K09228 KRAB domain-containing zinc finger protein | (RefSeq) ZNF90, HTF9; zinc finger protein 90	Herpes simplex virus 1 infection (ko05168)	[R]	General function prediction only	Zinc-finger double domain	Zinc finger protein 90 OS=Homo sapiens OX=9606 GN=ZNF90 PE=2 SV=3	K	Transcription	zinc finger protein 90 [Homo sapiens]	molecular function: binding (GO:0005488);; biological process: biological regulation (GO:0065007)
[truncated: 1,295 more rows]
