# Supplementary material for: Dalpiciclib partially abrogates ER signaling activation induced by pyrotinib in HER2+HR+ breast cancer
Source: eLife. 2023 Jan 5;12:e85246. doi: 10.7554/eLife.85246 (PMC9822241; doi:10.7554/eLife.85246)
Supplement: Figure 4—figure supplement 1—source data 1. [file elife-85246-fig4-figsupp1-data1.xlsx]

## Sheet: Sheet1
WT			NC			sh1			sh2			sh3
relative expression	SD		relative expression	SD		relative expression	SD		relative expression	SD		relative expression	SD
0.9625	0.234425		1	0.282725		0.0805	0.0162		0.10966	0.01014		0.116415	0.039525
