# Supplementary material for: Dalpiciclib partially abrogates ER signaling activation induced by pyrotinib in HER2+HR+ breast cancer
Source: eLife. 2023 Jan 5;12:e85246. doi: 10.7554/eLife.85246 (PMC9822241; doi:10.7554/eLife.85246)
Supplement: Figure 4—source data 2. [file elife-85246-fig4-data2.xlsx]

## Sheet: Sheet1
Figure 4 b		G0-G1			S			G2-M
		test1	test2	test3	test1	test2	test3	test1	test2	test3
	DMSO ctrl	72.14	69.55	69.11	18.19	20.5	20.61	9.67	9.95	10.29
	pyrotinib	73.86	73.86	73.58	16.18	16.76	17.31	9.96	9.38	9.11
	tamoxifen	70.94	71.37	71.61	18.97	17.74	18.41	10.09	10.89	9.98
	dalipiciclib	83.47	82.98	83.42	6.59	7.08	6.54	9.94	9.94	10.05
	pyrotinib+tamoxifen	76.93	78.02	78.72	15.02	13.57	13.81	8.05	8.41	7.48
	pyrotinib+dalpiciclib	83.38	83.26	83.58	7.48	7.86	7.04	9.14	8.88	9.38
	tamoxifen+dalpiciclib	83.36	82.69	82.8	7.22	7.24	7.14	9.42	10.07	10.06
	3 combination	84.71	84.91	84.33	7.66	7.68	8.25	7.62	7.41	7.42
Figure 4 c			Trastuzumab+chemotherapy					pyrotinib+dalpiciclib+letrozole
			CALML5 positive	CALML5 negative				CALML5 positive	CALML5 negative
		PR+PCR	3	8			PR+PCR	5	12
		PD+SD	15	15			PD+SD	5	4
Figure 4 d				trastuzumab+chemotherapy	pyrotinib+letrozole+dalpiciclib
			CALML5 reduced or unchanged	17	20
			CALML5 elevated	24	6
Figure 4 f			tumor volume
		days	NC DMSO						sh DMSO						NC pyrotinib+tamoxifen						sh pyrotinib+tamoxifen						NC pyrotinib+tamoxifen+dalpiciclib						sh pyrotinib+tamoxifen+dalpiciclib
		1	48.5	51.5	57.9	44.8	60.32		53.2	51	55.6	44.3	58.7		56.8	51.8	44.8	50.4	51.8		53.2	50.8	52.6	51.3	48.6		53.2	50.8	52.6	43.4	48.6		51.2	41.2	54.3	46.8	54.8
		4	70.5	68.5	90.8	75.8	100.8		78.6	70.4	88.4	73.2	89.4		66.8	54.9	51.6	52.3	57.8		62.3	52.5	61.2	58.9	54.3		58.9	52.5	63.8	48.7	54.3		62.3	44.5	54.6	48.7	60.3
		7	90.6	88.7	112.4	94.8	136.4		88.4	91.6	108.2	94.8	118.4		88.4	78.5	71.4	81.2	84.8		83.2	88.6	77.8	84.3	68.4		65.3	63.2	81.5	64.8	81.2		74.3	53.2	60.6	64.8	71.5
		10	134.8	121.4	143.2	138.4	178.3		121.4	128.6	140.4	131.5	170.4		101.8	84.6	88.5	93.4	91.2		91.2	96.5	91.2	94.5	82.5		71.8	76.5	92.4	78.4	92.3		88.6	56.4	71.3	70.3	82.4
		13	190.2	210.2	194.2	189.4	248.6		180.2	190.4	191.2	184.2	208.9		138.6	112.4	103.6	124.4	118.6		108.4	118.2	108.5	112.4	91.4		82.4	86.8	124.3	94.3	104.5		93.4	61.2	81.3	81.2	91.6
		16	286.5	288.4	275	232.8	297.5		244.5	249.2	266.4	225.6	320.8		194.3	145.6	136.4	184.6	158.6		131.6	147.4	140.4	135.6	108.2		91.3	96.7	158.6	108.5	134.3		108.5	63.8	90.1	84.8	118.2
		19	324.8	364.8	365.8	312.4	396		320.6	331.4	384.2	304.8	412.5		288.5	256.8	189.6	274.3	260.4		210.4	258.7	194.3	248.3	154.2		104.2	118.5	214.3	116.4	185.2		112.8	69.4	91.2	88.6	189.2
		22	512.3	580.4	587.6	472.8	543		484.2	560.2	568.4	488.5	664.2		384.6	352.1	274.5	365.2	344.6		279.6	311.6	289.5	303.2	178.3		128.8	132.4	324.5	131.4	274.3		131.2	81.2	104.2	93.6	257.4
		25	648.4	676	697.4	568.3	689		589.3	664.5	708.2	544.3	768.2		574.3	437.4	392.4	564.8	552.3		383.2	423.4	413.2	396.8	210.4		204.8	242.3	408.2	192.4	449.2		210.1	88.9	124.3	118.5	386.5
		28	976	923	1034	876	732		889.5	974.3	1123.4	788.5	1189.4		847.8	742.3	580.9	812.3	823.4		411.4	514.2	584.8	567.4	248.1		272.4	308.4	476.3	268.4	589.4		286.4	108.4	204.1	213.4	412.8
		31	1448	1364	1568	1224	1143		1248	1432	1523.6	1187.6	1634.5		1218.4	987.6	741.8	1023.4	1134.8		532	643.8	748.3	732.3	334.2		384.3	443.2	543.2	364.3	784.3		387.8	124.3	284.3	292.3	523.4
		34	2025	2010	2176	1800	1764		1685	1986	2024	1552	2189		1605.5	1372	982	1470	1764.4		716	857	1008	968	486		506.25	590.6	756.5	532.5	1058		578.8	158.6	379.3	382.5	716.6
			tumor weight
			NC DMSO	sh DMSO	NC pyrotinib+tamoxifen	sh pyrotinib+tamoxifen	NC pyrotinib+tamoxifen+dalpiciclib	sh pyrotinib+tamoxifen+dalpiciclib
			2293	2248	1582	1208	942	721
			2142	2038	1343	1014	684	612
			1783	2124	1132	856	538	483
			1894	1682	1782	738	562	388
			1621	1883	1231	532	487	212
