# Supplementary figures and images for: Dalpiciclib partially abrogates ER signaling activation induced by pyrotinib in HER2+HR+ breast cancer
Source: eLife journal article supplement (doi:10.7554/elife.85246), 2022-12-30

## Raw gels of Figure 4 a

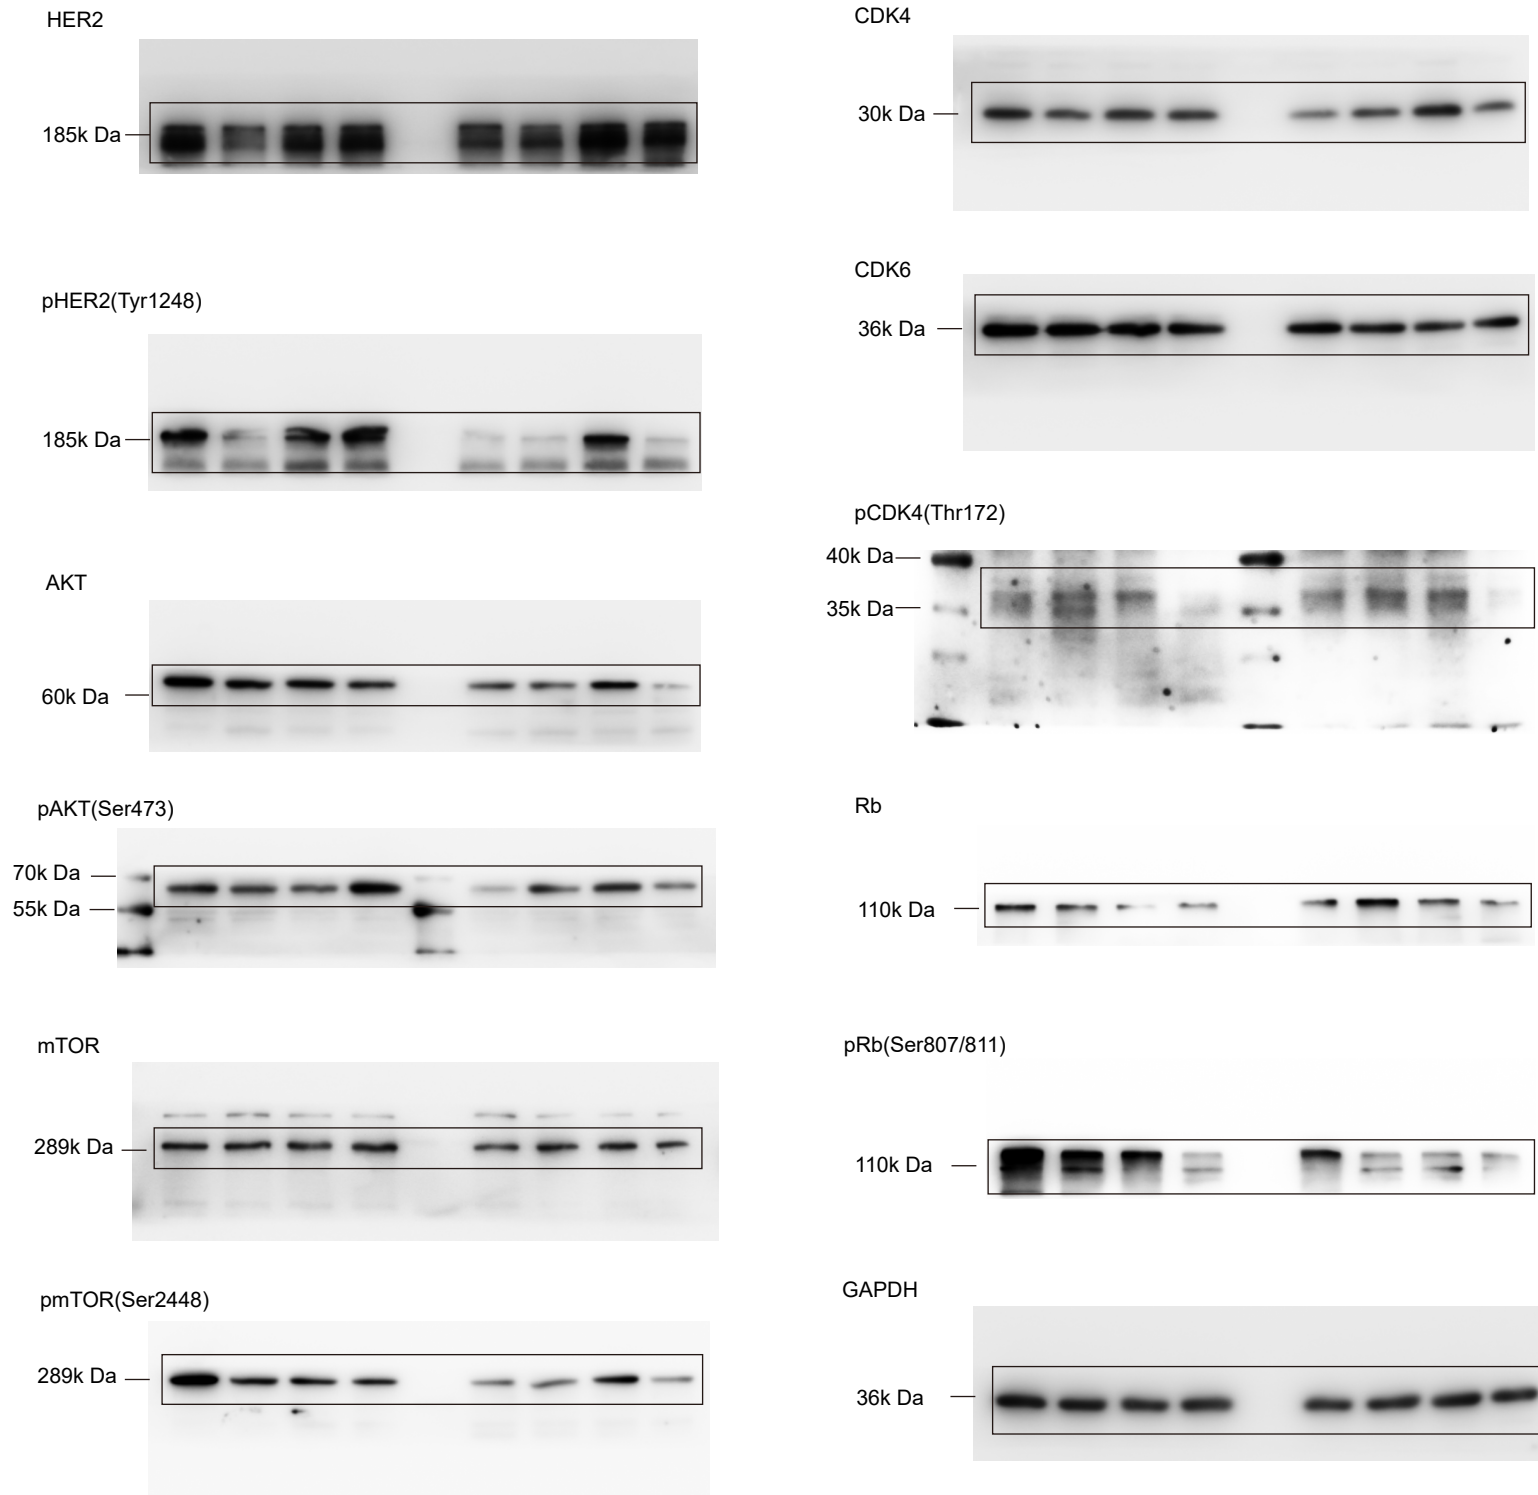

Supplement: fig4-data1 [file elife-85246-fig4-data1-v2.zip]

Raw gels of Figure 2-figure supplement 1 a, b and d

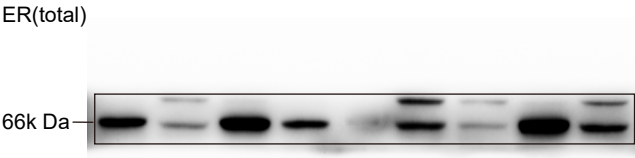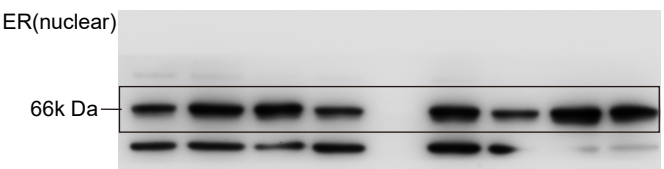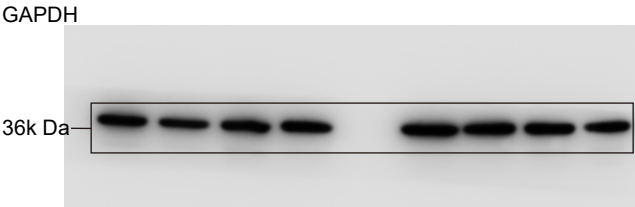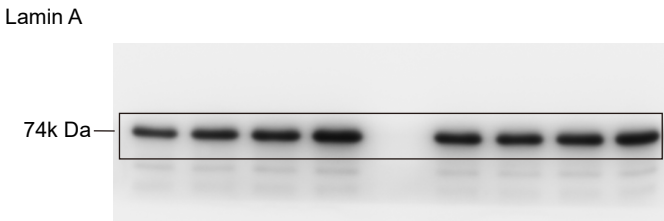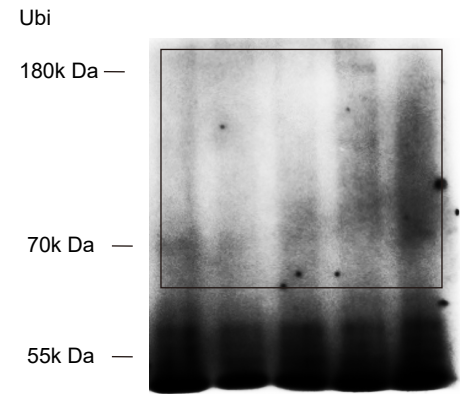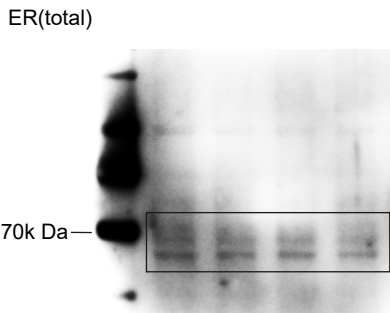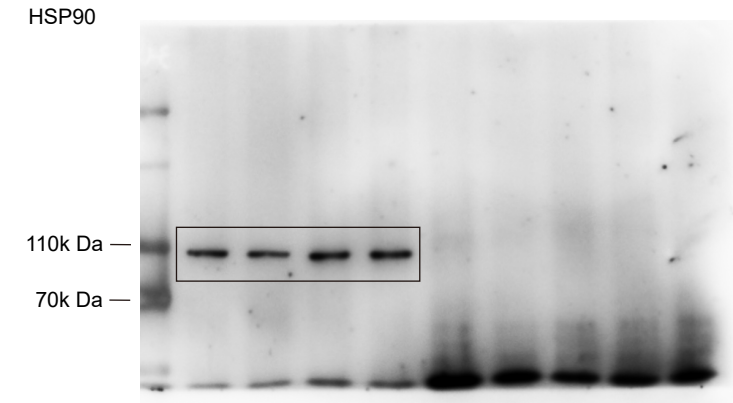

Supplement: supp [file Figure 2-figure supplement 1 a b and d.pdf › Figure 2-sigure supplement 1 source data 1/Figure 2-figure supplement 1 a b and d.pdf]

# Fig 1-figure supplement 1

**a**

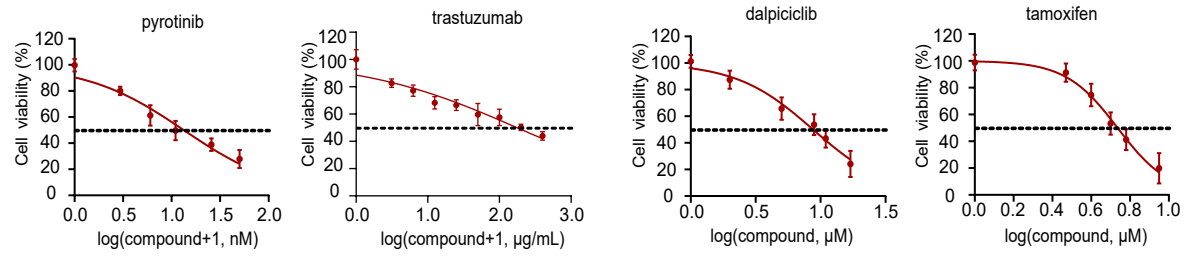

**b**

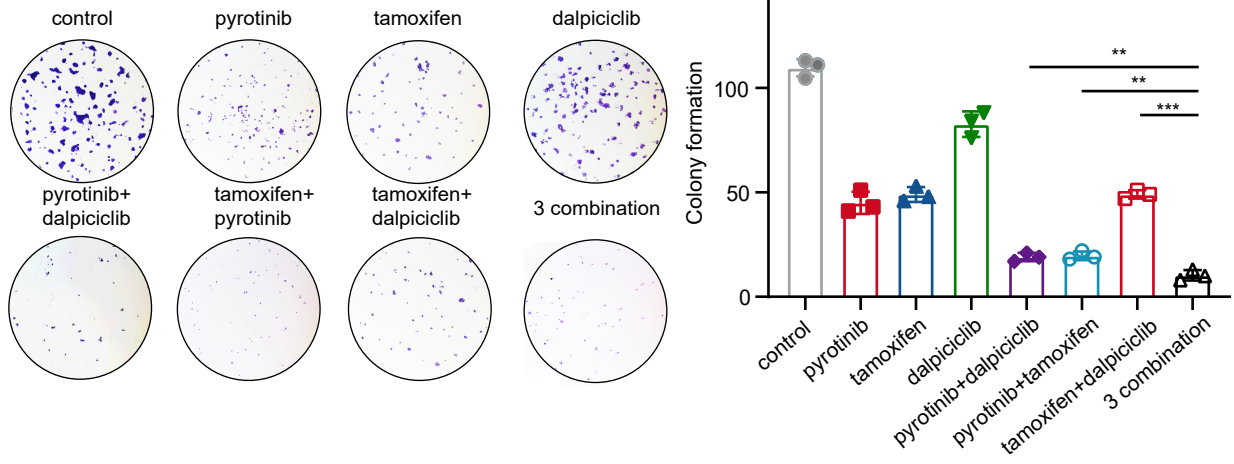

Supplement: supp [file elife_poa_e85246_Figure_1_figure_supplement_1.pdf › elife_poa_e85246_Figure_1_figure_supplement_1.pdf]

Fig 2-figure supplement 1

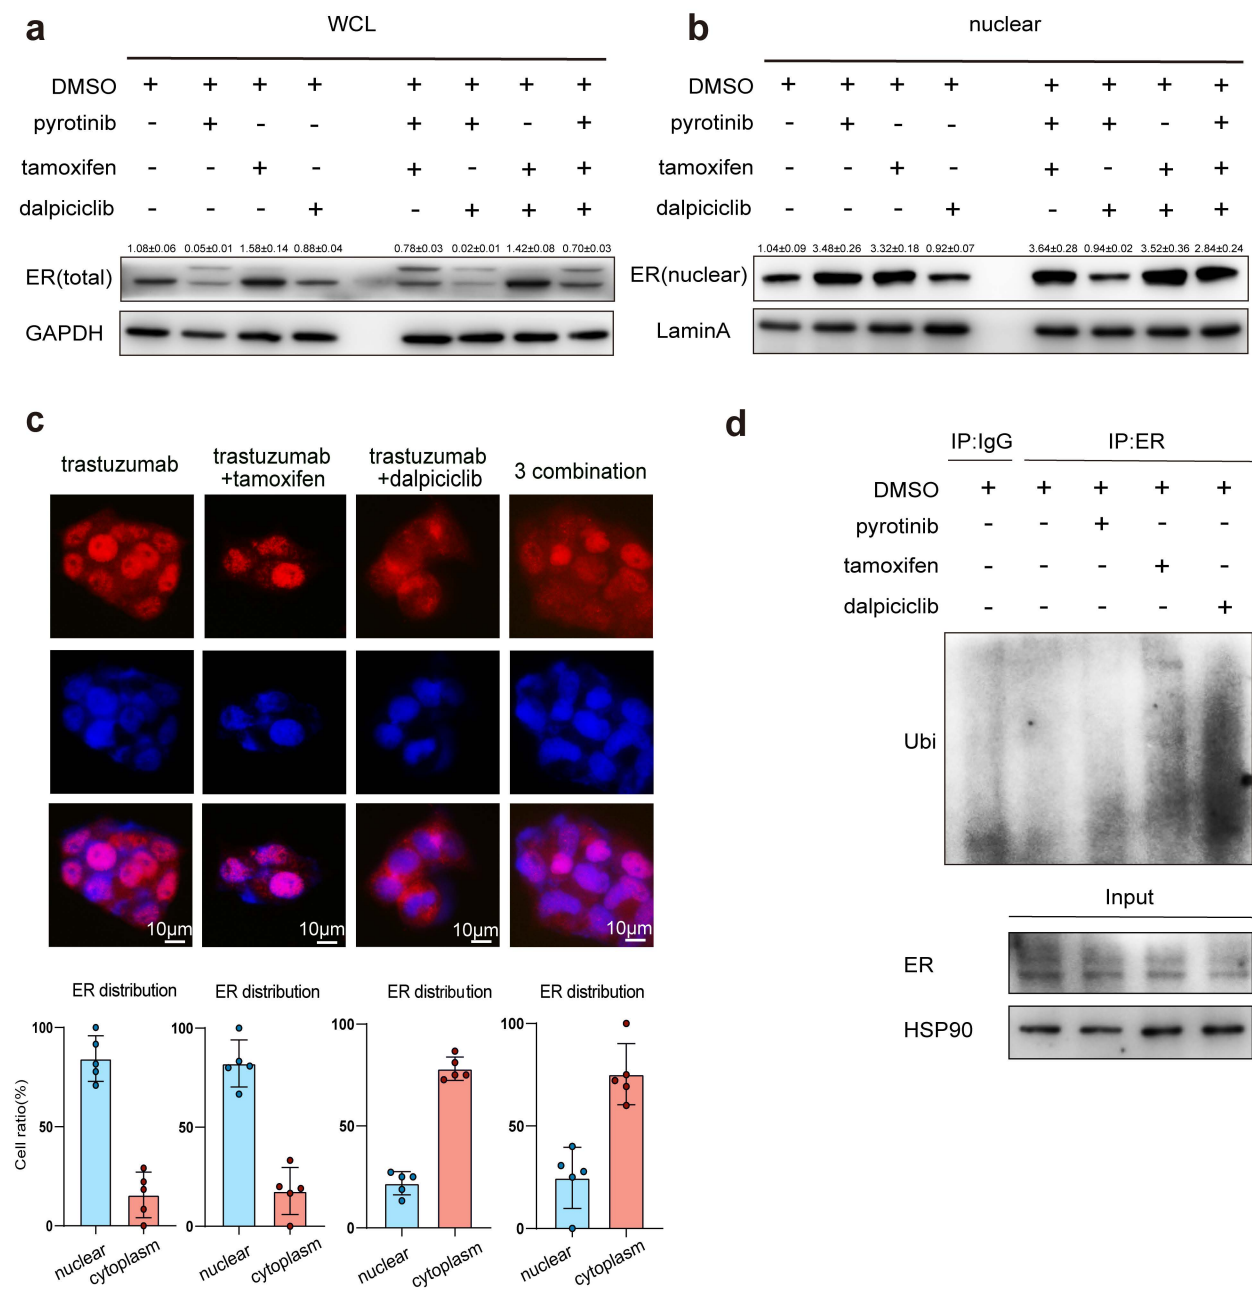

Supplement: supp [file elife_poa_e85246_Figure_2_figure_supplement_1.pdf › elife_poa_e85246_Figure_2_figure_supplement_1.pdf]

Fig 4-figure supplement 1

a

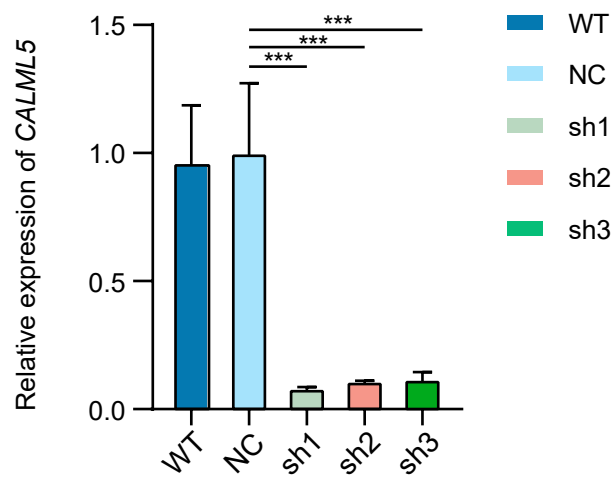

b

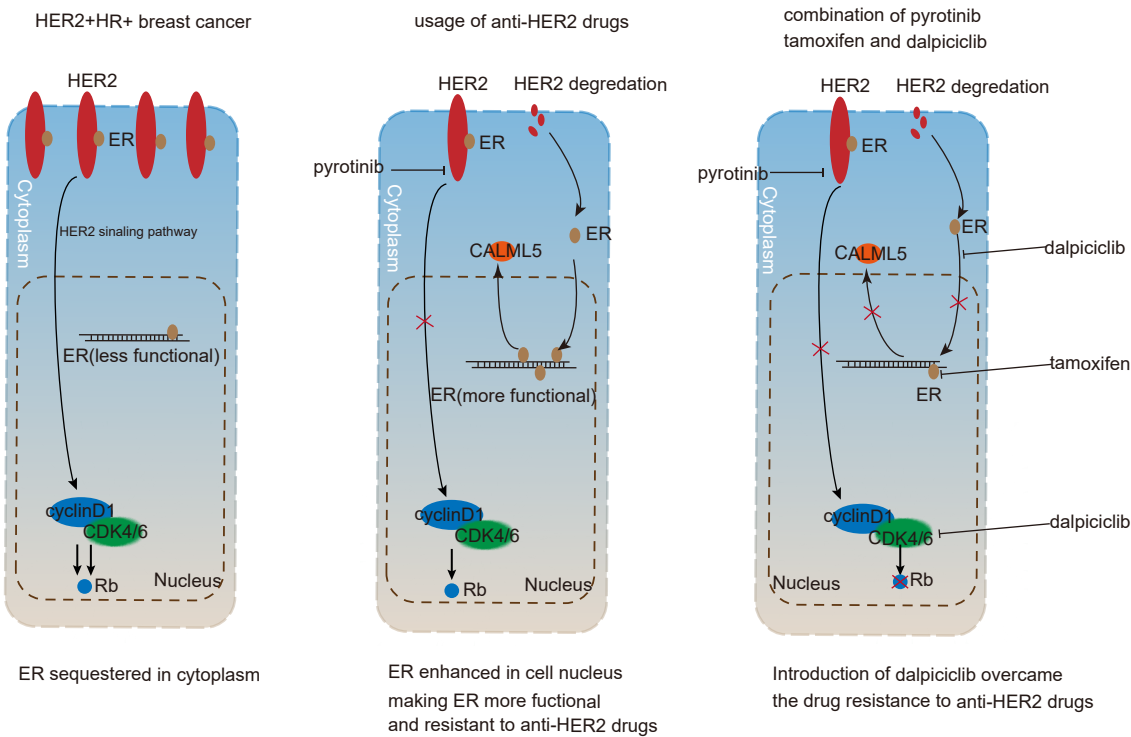

Supplement: supp [file elife_poa_e85246_Figure_4_figure_supplement_1.pdf › elife_poa_e85246_Figure_4_figure_supplement_1.pdf]
